# Supplementary material for: A multifaceted analysis reveals two distinct phases of chloroplast biogenesis during de-etiolation in Arabidopsis
Source: eLife. 2021 Feb 25;10:e62709. doi: 10.7554/eLife.62709 (PMC7906606; doi:10.7554/eLife.62709)
Supplement: Figure 5—source data 1. [file elife-62709-fig5-data1.xlsx]

## Sheet: Protein quantification
								FC > 8
								FC between 4 and 8
								FC between 2 and 4
								FC between 0.5 and 2
								FC between 0.5 and 0.25
								FC between 0.25 and 0.125
								FC < 0.125
	If more than one identifier, i.e. a protein group, is listed: The first identifier is the "lead" identifier, followed by the identifiers that do not have unique peptides, but only ones that are shared with the "lead". The “lead” identifier matches to all peptides associated to the group and may have own unique peptides. It furthermore has the greatest coverage of all identifiers (or highest score…						calculations excluding replicates 0h_rep4 and 48h_rep3
							96h timepoint vs 0h timepoint					72h timepoint vs 0h timepoint					48h timepoint vs 0h timepoint					24h timepoint vs 0h timepoint					12h timepoint vs 0h timepoint					8h timepoint vs 0h timepoint					4h timepoint vs 0h timepoint					96h timepoint vs 72h timepoint					96h timepoint vs 48h timepoint
location_consensus	Accession	Description	Peptide count	Unique peptides	Confidence score for identification	Mass	Accession	Fold change 96h/0h	Anova (p)	q Value (BH method)	Power	Accession	Fold change 72h/0h	Anova (p)	q Value (BH method)	Power	Accession	Fold change 48h/0h	Anova (p)	q Value (BH method)	Power	Accession	Fold change 24h/0h	Anova (p)	q Value (BH method)	Power	Accession	Fold change 12h/0h	Anova (p)	q Value (BH method)	Power	Accession	Fold change 8h/0h	Anova (p)	q Value (BH method)	Power	Accession	Fold change 4h/0h	Anova (p)	q Value (BH method)	Power	Accession	Fold change 96h/72h	Anova (p)	q Value (BH method)	Power	Accession	Fold Change 96h/48h	Anova (p)
plastid	AT4G39120.2	| inositol monophosphatase family protein | Chr4:18225578-18227988 REVERSE LENGTH=375 | 201606	2	2	1.994	41761.1	AT4G39120.2	3006.2	0.000661288	0.00378453	0.999943	AT4G39120.2	4088.48	0.000388806	0.00207554	0.999997	AT4G39120.2	2017.21	0.0121915	0.065218	0.8939	AT4G39120.2	446.909	0.401568	0.519925	0.118358	AT4G39120.2	27.6392	0.83401	0.944488	0.0538865	AT4G39120.2	11.9397	0.885649	0.98168	0.0518241	AT4G39120.2	40.0259	0.814305	0.943684	0.0548902	AT4G39120.2	0.735286	0.384302	0.804409	0.125187	AT4G39120.2	1.49027	0.308352
plastid	AT5G38520.1;AT5G38520.2	| alpha/beta-Hydrolases superfamily protein | Chr5:15421605-15423234 FORWARD LENGTH=362 | 201606 [AT5G38520.1,AT5G38520.2]	2	2	1.982	39570.5	AT5G38520.1;AT5G38520.2	2241.58	0.00372084	0.0125393	0.981646	AT5G38520.1;AT5G38520.2	1596.41	0.00441755	0.0120764	0.973688	AT5G38520.1;AT5G38520.2	1310.44	0.0160121	0.0759791	0.844764	AT5G38520.1;AT5G38520.2	288.417	0.0102964	0.0345618	0.893529	AT5G38520.1;AT5G38520.2	21.9478	0.0530065	0.409391	0.537777	AT5G38520.1;AT5G38520.2	7.59982	0.2057	0.67925	0.224221	AT5G38520.1;AT5G38520.2	4.38287	0.155967	0.763824	0.279159	AT5G38520.1;AT5G38520.2	1.40414	0.0797893	0.669977	0.425107	AT5G38520.1;AT5G38520.2	1.71055	0.0461766
endoplasmic reticulum	AT4G12310.1;AT4G12300.1	| cytochrome P450%2C family 706%2C subfamily A%2C polypeptide 5 | Chr4:7310598-7312522 REVERSE LENGTH=520 | 201606	4	2	3.981	59048.4	AT4G12310.1;AT4G12300.1	1876.98	0.121395	0.184654	0.333829	AT4G12310.1;AT4G12300.1	2383.04	0.00101356	0.00411744	0.999628	AT4G12310.1;AT4G12300.1	2324.55	0.00468395	0.0393627	0.984759	AT4G12310.1;AT4G12300.1	883.497	0.00173226	0.0104677	0.997536	AT4G12310.1;AT4G12300.1	85.7387	0.0923932	0.476673	0.397913	AT4G12310.1;AT4G12300.1	34.062	0.0202887	0.297139	0.771548	AT4G12310.1;AT4G12300.1	3.81337	0.988803	0.997439	0.0500173	AT4G12310.1;AT4G12300.1	0.787642	0.346261	0.803914	0.139475	AT4G12310.1;AT4G12300.1	0.80746	0.433209
plastid	AT5G46110.1;AT5G46110.2;AT5G46110.3;AT5G46110.4	| Glucose-6-phosphate/phosphate translocator-like protein | Chr5:18697606-18700212 FORWARD LENGTH=410 | 201606 [AT5G46110.1,AT5G46110.3,AT5G46110.4]	3	2	3.98	44634.5	AT5G46110.1;AT5G46110.2;AT5G46110.3;AT5G46110.4	1101.82	0.00447799	0.0142401	0.97296	AT5G46110.1;AT5G46110.2;AT5G46110.3;AT5G46110.4	183.005	0.00824617	0.0194104	0.922112	AT5G46110.1;AT5G46110.2;AT5G46110.3;AT5G46110.4	19.3613	0.823229	0.884866	0.0540448	AT5G46110.1;AT5G46110.2;AT5G46110.3;AT5G46110.4	61.9115	0.0197784	0.055349	0.776988	AT5G46110.1;AT5G46110.2;AT5G46110.3;AT5G46110.4	7.62775	0.282641	0.68189	0.168966	AT5G46110.1;AT5G46110.2;AT5G46110.3;AT5G46110.4	3.22888	0.665577	0.919897	0.0668809	AT5G46110.1;AT5G46110.2;AT5G46110.3;AT5G46110.4	41.3906	0.543251	0.858829	0.0842769	AT5G46110.1;AT5G46110.2;AT5G46110.3;AT5G46110.4	6.02067	0.052728	0.628633	0.523737	AT5G46110.1;AT5G46110.2;AT5G46110.3;AT5G46110.4	56.908	0.0233943
cytosol	AT5G45900.1	| ThiF family protein | Chr5:18615304-18618436 FORWARD LENGTH=697 | 201606	2	1	1.968	76523.9	AT5G45900.1	916.352	0.12395	0.187866	0.329122	AT5G45900.1	524.483	0.368599	0.444523	0.129649	AT5G45900.1	1326.82	0.25182	0.397314	0.180022	AT5G45900.1	3173.86	0.00030804	0.00345576	0.999999	AT5G45900.1	917.393	0.679994	0.88598	0.065336	AT5G45900.1	698.306	0.361241	0.776905	0.132407	AT5G45900.1	861.2	0.356543	0.810716	0.134218	AT5G45900.1	1.74716	0.554236	0.872678	0.0830512	AT5G45900.1	0.690638	0.822989
plastid	AT1G15820.1	| light harvesting complex photosystem II subunit 6 | Chr1:5446685-5447676 REVERSE LENGTH=258 | 201606	9	9	10.895	27523.5	AT1G15820.1	545.695	3.92925e-08	2.85264e-05	1	AT1G15820.1	451.445	3.43515e-09	3.96125e-06	1	AT1G15820.1	351.755	1.47405e-06	0.00251867	1	AT1G15820.1	122.722	2.49781e-07	0.000133542	1	AT1G15820.1	21.9358	0.000379383	0.0602507	0.999997	AT1G15820.1	12.5433	6.40914e-07	0.00325712	1	AT1G15820.1	3.81168	1.56348e-05	0.030739	1	AT1G15820.1	1.20877	0.0643767	0.645464	0.475887	AT1G15820.1	1.55135	0.0178885
cytosol	AT1G72910.1;AT1G72930.1;AT1G72930.2;AT1G17600.1;AT1G27170.1;AT1G72860.1;AT1G72860.2;AT1G72860.3;AT1G72920.1	| Toll-Interleukin-Resistance (TIR) domain-containing protein | Chr1:27435634-27436887 FORWARD LENGTH=380 | 201606	2	1	1.986	42903.4	AT1G72910.1;AT1G72930.1;AT1G72930.2;AT1G17600.1;AT1G27170.1;AT1G72860.1;AT1G72860.2;AT1G72860.3;AT1G72920.1	354.231	0.00331858	0.0115435	0.985804	AT1G72910.1;AT1G72930.1;AT1G72930.2;AT1G17600.1;AT1G27170.1;AT1G72860.1;AT1G72860.2;AT1G72860.3;AT1G72920.1	286.493	0.00361587	0.0103692	0.982766	AT1G72910.1;AT1G72930.1;AT1G72930.2;AT1G17600.1;AT1G27170.1;AT1G72860.1;AT1G72860.2;AT1G72860.3;AT1G72920.1	221.665	0.0213851	0.0889355	0.781747	AT1G72910.1;AT1G72930.1;AT1G72930.2;AT1G17600.1;AT1G27170.1;AT1G72860.1;AT1G72860.2;AT1G72860.3;AT1G72920.1	8.17844	0.841924	0.889349	0.0535177	AT1G72910.1;AT1G72930.1;AT1G72930.2;AT1G17600.1;AT1G27170.1;AT1G72860.1;AT1G72860.2;AT1G72860.3;AT1G72920.1	3.79661	0.672913	0.884703	0.0660833	AT1G72910.1;AT1G72930.1;AT1G72930.2;AT1G17600.1;AT1G27170.1;AT1G72860.1;AT1G72860.2;AT1G72860.3;AT1G72920.1	2.74874	0.921147	0.987549	0.0508628	AT1G72910.1;AT1G72930.1;AT1G72930.2;AT1G17600.1;AT1G27170.1;AT1G72860.1;AT1G72860.2;AT1G72860.3;AT1G72920.1	1.2807	0.879212	0.963554	0.0520375	AT1G72910.1;AT1G72930.1;AT1G72930.2;AT1G17600.1;AT1G27170.1;AT1G72860.1;AT1G72860.2;AT1G72860.3;AT1G72920.1	1.23644	0.684206	0.910834	0.0652641	AT1G72910.1;AT1G72930.1;AT1G72930.2;AT1G17600.1;AT1G27170.1;AT1G72860.1;AT1G72860.2;AT1G72860.3;AT1G72920.1	1.59805	0.283935
mitochondrion	AT5G50100.1	| Putative thiol-disulfide oxidoreductase DCC | Chr5:20371916-20373172 FORWARD LENGTH=214 | 201606	2	2	1.994	24430.3	AT5G50100.1	333.831	0.0136312	0.0327225	0.849179	AT5G50100.1	305.892	0.0142309	0.0296035	0.841577	AT5G50100.1	230.868	0.0444756	0.13782	0.589446	AT5G50100.1	158.527	0.0197279	0.055349	0.77753	AT5G50100.1	24.1838	0.0553346	0.417198	0.526729	AT5G50100.1	8.09645	0.104976	0.562158	0.367418	AT5G50100.1	6.28719	0.167039	0.763824	0.264987	AT5G50100.1	1.09133	0.198851	0.763688	0.230613	AT5G50100.1	1.44598	0.192592
cytosol	AT5G59160.1;AT5G59160.2;AT5G59160.3	| type one serine/threonine protein phosphatase 2 | Chr5:23879567-23881102 FORWARD LENGTH=312 | 201606 [AT5G59160.1,AT5G59160.2,AT5G59160.3]	3	1	3.987	35533.5	AT5G59160.1;AT5G59160.2;AT5G59160.3	196.294	0.623113	0.698117	0.0719961	AT5G59160.1;AT5G59160.2;AT5G59160.3	5.7747	0.932581	0.945606	0.0506299	AT5G59160.1;AT5G59160.2;AT5G59160.3	0.464838	0.29937	0.447601	0.152896	AT5G59160.1;AT5G59160.2;AT5G59160.3	0.80124	0.520104	0.627383	0.0886111	AT5G59160.1;AT5G59160.2;AT5G59160.3	0.287726	0.241748	0.649229	0.195056	AT5G59160.1;AT5G59160.2;AT5G59160.3	0.904078	0.531906	0.873287	0.0863524	AT5G59160.1;AT5G59160.2;AT5G59160.3	0.787987	0.415548	0.822372	0.114043	AT5G59160.1;AT5G59160.2;AT5G59160.3	33.992	0.582204	0.880517	0.0784294	AT5G59160.1;AT5G59160.2;AT5G59160.3	422.284	0.215599
mitochondrion	AT1G64880.1	| Ribosomal protein S5 family protein | Chr1:24105713-24108780 FORWARD LENGTH=515 | 201606	3	2	2.947	60238.2	AT1G64880.1	172.442	0.953157	0.965699	0.0503036	AT1G64880.1	0.292353	0.108613	0.158567	0.359432	AT1G64880.1	37.3131	0.060324	0.163941	0.504948	AT1G64880.1	2.91762	0.691412	0.774467	0.064177	AT1G64880.1	3.21529	0.563626	0.835834	0.0807721	AT1G64880.1	1.58525	0.690575	0.927762	0.06426	AT1G64880.1	1.03366	0.617439	0.880641	0.0727477	AT1G64880.1	589.842	0.277442	0.795981	0.172941	AT1G64880.1	4.6215	0.50758
plastid	AT4G33470.1	| histone deacetylase 14 | Chr4:16102774-16105439 REVERSE LENGTH=423 | 201606	3	3	2.942	45578.5	AT4G33470.1	148.638	0.00237695	0.00910297	0.993829	AT4G33470.1	126.49	0.00278749	0.00851591	0.990665	AT4G33470.1	47.3587	0.0367378	0.122749	0.642278	AT4G33470.1	51.5963	0.00673101	0.0260793	0.943301	AT4G33470.1	8.56623	0.112145	0.512649	0.351992	AT4G33470.1	3.93109	0.174387	0.657616	0.256275	AT4G33470.1	6.09787	0.0484316	0.742917	0.560988	AT4G33470.1	1.1751	0.591201	0.88369	0.0770451	AT4G33470.1	3.13856	0.0803509
plastid	AT1G29930.1	| chlorophyll A/B binding protein 1 | Chr1:10478071-10478874 FORWARD LENGTH=267 | 201606	10	5	13.887	28241.9	AT1G29930.1	146.122	1.22323e-07	3.45358e-05	1	AT1G29930.1	121.758	1.27637e-07	1.8533e-05	1	AT1G29930.1	75.9528	7.02834e-06	0.00251867	1	AT1G29930.1	33.0822	1.75608e-06	0.000241199	1	AT1G29930.1	8.22969	0.00103795	0.0925416	0.999592	AT1G29930.1	4.54848	5.52458e-05	0.0195379	1	AT1G29930.1	1.71039	0.00332331	0.459162	0.985757	AT1G29930.1	1.2001	0.017578	0.494837	0.771198	AT1G29930.1	1.92385	0.000405483
plastid	AT5G39830.1;AT5G39830.2	| Trypsin family protein with PDZ domain-containing protein | Chr5:15942883-15945676 FORWARD LENGTH=448 | 201606 [AT5G39830.1,AT5G39830.2]	2	1	1.994	47492.8	AT5G39830.1;AT5G39830.2	122.266	0.55975	0.641112	0.0814177	AT5G39830.1;AT5G39830.2	143.839	0.581698	0.650284	0.0778875	AT5G39830.1;AT5G39830.2	0.481675	0.922922	0.951763	0.0507537	AT5G39830.1;AT5G39830.2	0.0530433	0.387961	0.507405	0.122818	AT5G39830.1;AT5G39830.2	0.586123	0.810949	0.938941	0.0550735	AT5G39830.1;AT5G39830.2	0.0606891	0.556329	0.883745	0.0819956	AT5G39830.1;AT5G39830.2	2.53481	0.883519	0.963554	0.0518933	AT5G39830.1;AT5G39830.2	0.850019	0.986292	0.997232	0.0500266	AT5G39830.1;AT5G39830.2	253.834	0.575467
plastid	AT4G10340.1	| light harvesting complex of photosystem II 5 | Chr4:6408200-6409496 FORWARD LENGTH=280 | 201606	16	16	20.916	30158.3	AT4G10340.1	120.033	2.5008e-08	2.68058e-05	1	AT4G10340.1	94.5086	1.78252e-08	6.64826e-06	1	AT4G10340.1	74.4354	2.07792e-05	0.00405256	1	AT4G10340.1	35.7237	4.45264e-07	0.000188569	1	AT4G10340.1	8.23968	0.000355133	0.0602507	0.999998	AT4G10340.1	4.98341	3.2093e-06	0.00494932	1	AT4G10340.1	1.83323	0.000509692	0.350906	0.999985	AT4G10340.1	1.27008	0.00236267	0.333464	0.985286	AT4G10340.1	1.61258	0.0193823
plastid	AT4G12830.1	| alpha/beta-Hydrolases superfamily protein | Chr4:7531189-7533327 FORWARD LENGTH=393 | 201606	2	1	1.986	43763.9	AT4G12830.1	113.962	0.0221219	0.0474762	0.752653	AT4G12830.1	210.951	0.315669	0.390039	0.151821	AT4G12830.1	58.2452	0.154004	0.289006	0.272724	AT4G12830.1	70.4535	0.0229102	0.0618649	0.744828	AT4G12830.1	4.2132	0.405515	0.762612	0.117113	AT4G12830.1	3.12229	0.933406	0.988941	0.0506146	AT4G12830.1	0.359159	0.895393	0.965497	0.0515239	AT4G12830.1	0.54023	0.550585	0.87123	0.083692	AT4G12830.1	1.95659	0.169617
plastid	AT2G46910.1	| Plastid-lipid associated protein PAP / fibrillin family protein | Chr2:19272427-19273856 FORWARD LENGTH=284 | 201606	3	2	2.983	31580.5	AT2G46910.1	110.674	0.0100257	0.0257847	0.897264	AT2G46910.1	117.53	0.0101577	0.0227206	0.895442	AT2G46910.1	43.8164	0.0573102	0.159415	0.519054	AT2G46910.1	24.2864	0.157503	0.258956	0.277111	AT2G46910.1	15.0396	0.620799	0.86035	0.0723006	AT2G46910.1	0.481566	0.814071	0.962924	0.0549029	AT2G46910.1	17.1789	0.906781	0.969548	0.0512081	AT2G46910.1	0.941674	0.961815	0.995194	0.050207	AT2G46910.1	2.52587	0.139252
plastid	AT1G34000.1	| one-helix protein 2 | Chr1:12358151-12358902 REVERSE LENGTH=172 | 201606	2	2	2.991	18665.6	AT1G34000.1	97.6541	3.90479e-06	0.000191088	1	AT1G34000.1	92.5566	6.34604e-07	4.03132e-05	1	AT1G34000.1	28.9902	0.00122773	0.0218728	0.999919	AT1G34000.1	9.18865	0.000265284	0.00314993	1	AT1G34000.1	4.93294	0.0335407	0.349645	0.654217	AT1G34000.1	3.29863	0.0444991	0.425985	0.582724	AT1G34000.1	1.89101	0.518456	0.84985	0.0889349	AT1G34000.1	1.05507	0.834663	0.961798	0.0539556	AT1G34000.1	3.36852	0.0127164
plastid	AT1G31330.1	| photosystem I subunit F | Chr1:11215011-11215939 REVERSE LENGTH=221 | 201606	6	6	6.922	24174.7	AT1G31330.1	89.5431	5.30805e-07	7.04906e-05	1	AT1G31330.1	73.007	1.69624e-07	2.15109e-05	1	AT1G31330.1	45.4	1.81824e-05	0.00401751	1	AT1G31330.1	21.3963	4.63646e-06	0.00038004	1	AT1G31330.1	3.92817	0.0131933	0.241181	0.854806	AT1G31330.1	2.4756	0.000270007	0.0442638	1	AT1G31330.1	1.22099	0.136065	0.751498	0.308399	AT1G31330.1	1.2265	0.0611085	0.637914	0.488342	AT1G31330.1	1.97232	0.00334194
plastid	ATCG00020.1	| photosystem II reaction center protein A | ChrC:383-1444 REVERSE LENGTH=353 | 201606	10	10	14.929	38937.6	ATCG00020.1	80.058	1.64965e-05	0.000406966	1	ATCG00020.1	70.8886	1.0893e-06	5.76649e-05	1	ATCG00020.1	33.6622	0.00738281	0.0500259	0.956141	ATCG00020.1	25.2649	3.10171e-05	0.000973018	1	ATCG00020.1	7.6207	0.00223762	0.110993	0.994768	ATCG00020.1	3.83701	0.00178842	0.096689	0.99728	ATCG00020.1	2.03307	0.01008	0.593805	0.896514	ATCG00020.1	1.12935	0.706681	0.919521	0.0630259	ATCG00020.1	2.37827	0.107418
mitochondrion	AT2G35660.1;AT2G29720.1	| FAD/NAD(P)-binding oxidoreductase family protein | Chr2:14988499-14990320 FORWARD LENGTH=439 | 201606	2	2	1.994	48315.8	AT2G35660.1;AT2G29720.1	79.8786	0.0120195	0.029724	0.870197	AT2G35660.1;AT2G29720.1	115.346	0.0099779	0.022437	0.897925	AT2G35660.1;AT2G29720.1	19.8274	0.0705637	0.179805	0.462337	AT2G35660.1;AT2G29720.1	14.2095	0.0285786	0.0725094	0.693344	AT2G35660.1;AT2G29720.1	12.5456	0.238618	0.648133	0.197328	AT2G35660.1;AT2G29720.1	2.92622	0.406516	0.803601	0.1168	AT2G35660.1;AT2G29720.1	5.49679	0.0449503	0.742917	0.580139	AT2G35660.1;AT2G29720.1	0.692515	0.0729577	0.656153	0.446157	AT2G35660.1;AT2G29720.1	4.02869	0.0289088
plastid	AT3G61470.1	| photosystem I light harvesting complex protein | Chr3:22745736-22747032 FORWARD LENGTH=257 | 201606	3	2	4.914	27756.3	AT3G61470.1	64.6969	3.85448e-05	0.000677802	1	AT3G61470.1	51.0234	4.93047e-05	0.000542352	1	AT3G61470.1	23.6855	0.0027118	0.0301561	0.99718	AT3G61470.1	8.1238	0.00105482	0.00760371	0.999565	AT3G61470.1	1.11931	0.743956	0.914751	0.059528	AT3G61470.1	0.667012	0.457987	0.832773	0.102403	AT3G61470.1	0.429975	0.121969	0.747071	0.332762	AT3G61470.1	1.26798	0.0317604	0.560329	0.643937	AT3G61470.1	2.7315	0.010392
plastid	AT4G05180.1;AT4G05180.2	| photosystem II subunit Q-2 | Chr4:2672093-2673170 REVERSE LENGTH=230 | 201606 [AT4G05180.1,AT4G05180.2]	11	9	13.817	24643.9	AT4G05180.1;AT4G05180.2	61.1104	6.70399e-07	7.60345e-05	1	AT4G05180.1;AT4G05180.2	45.518	4.42912e-09	3.96125e-06	1	AT4G05180.1;AT4G05180.2	33.9792	3.10667e-05	0.0052627	1	AT4G05180.1;AT4G05180.2	12.3093	3.90351e-08	7.20725e-05	1	AT4G05180.1;AT4G05180.2	3.16262	0.000203642	0.0431212	1	AT4G05180.1;AT4G05180.2	1.94617	0.000120066	0.0305087	1	AT4G05180.1;AT4G05180.2	1.11571	0.361187	0.81327	0.132428	AT4G05180.1;AT4G05180.2	1.34256	0.0563605	0.635867	0.507735	AT4G05180.1;AT4G05180.2	1.79847	0.0267042
peroxisome	AT1G52400.1;AT1G52400.3	| beta glucosidase 18 | Chr1:19515250-19517930 FORWARD LENGTH=528 | 201606 [AT1G52400.1,AT1G52400.3]	8	6	9.858	60460.5	AT1G52400.1;AT1G52400.3	45.4127	1.30644e-05	0.000364799	1	AT1G52400.1;AT1G52400.3	24.5278	3.5515e-05	0.000450093	1	AT1G52400.1;AT1G52400.3	8.97927	0.000149084	0.00912822	1	AT1G52400.1;AT1G52400.3	4.54721	0.0861133	0.162265	0.41507	AT1G52400.1;AT1G52400.3	1.25036	0.902217	0.970846	0.0513302	AT1G52400.1;AT1G52400.3	1.61086	0.237569	0.708108	0.198099	AT1G52400.1;AT1G52400.3	0.993171	0.824232	0.946748	0.0543691	AT1G52400.1;AT1G52400.3	1.85148	0.0405627	0.591426	0.586545	AT1G52400.1;AT1G52400.3	5.0575	0.000677381
plastid	AT2G05070.1;AT2G05100.2;AT3G27690.1;AT3G27690.2	| photosystem II light harvesting complex protein 2.2 | Chr2:1799436-1800329 REVERSE LENGTH=265 | 201606	8	4	8.947	28621.5	AT2G05070.1;AT2G05100.2;AT3G27690.1;AT3G27690.2	43.8695	2.51198e-06	0.000150187	1	AT2G05070.1;AT2G05100.2;AT3G27690.1;AT3G27690.2	40.6512	4.76846e-06	0.000130287	1	AT2G05070.1;AT2G05100.2;AT3G27690.1;AT3G27690.2	28.8422	6.98724e-05	0.00710322	1	AT2G05070.1;AT2G05100.2;AT3G27690.1;AT3G27690.2	12.2907	1.33388e-05	0.000613617	1	AT2G05070.1;AT2G05100.2;AT3G27690.1;AT3G27690.2	3.27944	0.00152273	0.104622	0.998371	AT2G05070.1;AT2G05100.2;AT3G27690.1;AT3G27690.2	2.64449	0.0031871	0.121667	0.987079	AT2G05070.1;AT2G05100.2;AT3G27690.1;AT3G27690.2	1.71689	0.0345228	0.739622	0.647036	AT2G05070.1;AT2G05100.2;AT3G27690.1;AT3G27690.2	1.07917	0.486722	0.844434	0.0964878	AT2G05070.1;AT2G05100.2;AT3G27690.1;AT3G27690.2	1.52102	0.013666
extracellular	AT4G17050.1	| ureidoglycine aminohydrolase | Chr4:9589662-9592413 FORWARD LENGTH=298 | 201606	2	2	1.994	33674.3	AT4G17050.1	43.691	0.0019686	0.00800996	0.996371	AT4G17050.1	58.1242	0.000899255	0.00373672	0.999772	AT4G17050.1	25.5682	0.0153514	0.0744427	0.853045	AT4G17050.1	15.3152	0.00394674	0.018086	0.97916	AT4G17050.1	10.9243	0.00700299	0.193938	0.939525	AT4G17050.1	11.3812	0.00687485	0.171534	0.941307	AT4G17050.1	12.4886	0.0410038	0.742917	0.603627	AT4G17050.1	0.751683	0.251293	0.781634	0.189191	AT4G17050.1	1.7088	0.271657
plastid	AT4G02770.1	| photosystem I subunit D-1 | Chr4:1229247-1229873 REVERSE LENGTH=208 | 201606	13	12	16.798	22598.6	AT4G02770.1	40.9556	7.13079e-08	2.89933e-05	1	AT4G02770.1	32.6929	1.07674e-08	5.14987e-06	1	AT4G02770.1	23.7418	1.66928e-06	0.00251867	1	AT4G02770.1	10.3074	1.27505e-06	0.000215993	1	AT4G02770.1	2.88332	0.000489397	0.0690866	0.999988	AT4G02770.1	2.46546	0.000182405	0.0386243	1	AT4G02770.1	1.59598	0.00697	0.562247	0.939984	AT4G02770.1	1.25274	0.0109696	0.44949	0.854033	AT4G02770.1	1.72504	0.00108252
plastid	ATCG00710.1	| photosystem II reaction center protein H | ChrC:74485-74706 FORWARD LENGTH=73 | 201606	3	3	3.988	7702.2	ATCG00710.1	40.6417	9.69993e-07	9.38761e-05	1	ATCG00710.1	28.8309	6.66224e-07	4.1673e-05	1	ATCG00710.1	15.2338	0.000318278	0.0122537	1	ATCG00710.1	6.31734	3.88345e-06	0.000334503	1	ATCG00710.1	2.14031	7.24646e-05	0.0334786	1	ATCG00710.1	1.76499	0.00205028	0.100639	0.995914	ATCG00710.1	1.26906	0.0629184	0.742917	0.493821	ATCG00710.1	1.40966	0.0384997	0.590381	0.598928	ATCG00710.1	2.66787	0.00574532
plastid	AT3G61870.1	| plant/protein | Chr3:22902702-22903895 FORWARD LENGTH=272 | 201606	2	2	1.994	29586.5	AT3G61870.1	38.2726	5.33667e-06	0.000216968	1	AT3G61870.1	35.901	3.95847e-06	0.000114301	1	AT3G61870.1	19.8577	0.000604309	0.0155508	0.999999	AT3G61870.1	10.7647	5.4877e-05	0.00130498	1	AT3G61870.1	3.13934	0.0797983	0.4627	0.433876	AT3G61870.1	2.75983	0.00249738	0.113319	0.99296	AT3G61870.1	2.15215	0.0185829	0.642303	0.79005	AT3G61870.1	1.06606	0.572877	0.878932	0.079916	AT3G61870.1	1.92734	0.0255353
plasma membrane	AT3G28270.1;AT3G28270.2	| transmembrane protein%2C putative (DUF677) | Chr3:10538725-10539849 FORWARD LENGTH=374 | 201606 [AT3G28270.1,AT3G28270.2]	3	2	2.964	41613.9	AT3G28270.1;AT3G28270.2	38.1954	0.00946098	0.0247711	0.905102	AT3G28270.1;AT3G28270.2	21.0414	0.0112672	0.024681	0.880284	AT3G28270.1;AT3G28270.2	1.68897	0.393943	0.535729	0.11574	AT3G28270.1;AT3G28270.2	0.94059	0.710941	0.790072	0.0623212	AT3G28270.1;AT3G28270.2	1.62544	0.203374	0.624878	0.226357	AT3G28270.1;AT3G28270.2	1.56596	0.683741	0.925865	0.0649495	AT3G28270.1;AT3G28270.2	6.23158	0.583034	0.87273	0.0776822	AT3G28270.1;AT3G28270.2	1.81525	0.219885	0.778246	0.212316	AT3G28270.1;AT3G28270.2	22.6146	0.0031412
mitochondrion	AT5G24165.1;AT5G24165.2	| hypothetical protein | Chr5:8188622-8189087 FORWARD LENGTH=75 | 201606 [AT5G24165.1,AT5G24165.2]	2	2	1.977	7756.1	AT5G24165.1;AT5G24165.2	37.5271	0.000206925	0.00179453	1	AT5G24165.1;AT5G24165.2	28.5215	0.000243937	0.00150444	1	AT5G24165.1;AT5G24165.2	25.3846	0.595259	0.711623	0.0737635	AT5G24165.1;AT5G24165.2	3.98827	0.102499	0.186036	0.373054	AT5G24165.1;AT5G24165.2	3.82646	0.0149888	0.256475	0.832144	AT5G24165.1;AT5G24165.2	1.51465	0.209157	0.684548	0.22111	AT5G24165.1;AT5G24165.2	57.1905	0.423113	0.827694	0.111813	AT5G24165.1;AT5G24165.2	1.31575	0.271755	0.793772	0.176275	AT5G24165.1;AT5G24165.2	1.47834	0.165388
plastid	AT3G25760.1	| allene oxide cyclase 1 | Chr3:9403972-9405105 FORWARD LENGTH=254 | 201606	3	1	2.984	27802.8	AT3G25760.1	37.3384	0.000873054	0.00461212	0.999799	AT3G25760.1	26.5674	0.00114663	0.00449628	0.999401	AT3G25760.1	8.69971	0.020336	0.0864834	0.793422	AT3G25760.1	2.81592	0.0835322	0.158459	0.422556	AT3G25760.1	1.03551	0.674772	0.884703	0.065885	AT3G25760.1	0.664555	0.65062	0.912066	0.0685835	AT3G25760.1	1.24906	0.901713	0.967935	0.0513441	AT3G25760.1	1.40542	0.173722	0.7474	0.256329	AT3G25760.1	4.29192	0.00292781
plastid	AT4G28750.1	| Photosystem I reaction centre subunit IV / PsaE protein | Chr4:14202951-14203888 REVERSE LENGTH=143 | 201606	4	2	3.907	14966.7	AT4G28750.1	37.1475	1.2122e-08	2.05347e-05	1	AT4G28750.1	29.5953	6.05577e-08	1.21686e-05	1	AT4G28750.1	12.9878	9.55416e-05	0.00714033	1	AT4G28750.1	7.39021	1.55129e-06	0.000229537	1	AT4G28750.1	2.43451	0.000771886	0.0791857	0.999882	AT4G28750.1	2.05695	0.000634015	0.0582119	0.999953	AT4G28750.1	1.33321	0.00479081	0.502514	0.969115	AT4G28750.1	1.25518	0.00327331	0.335811	0.972731	AT4G28750.1	2.86017	0.000435925
plasma membrane	AT5G58800.1;AT5G58800.2	| Quinone reductase family protein | Chr5:23746032-23746895 REVERSE LENGTH=207 | 201606 [AT5G58800.1,AT5G58800.2]	2	2	1.993	22723	AT5G58800.1;AT5G58800.2	36.8607	2.03563e-06	0.000138316	1	AT5G58800.1;AT5G58800.2	28.6504	1.62264e-05	0.0002766	1	AT5G58800.1;AT5G58800.2	7.23807	0.0544697	0.154386	0.533108	AT5G58800.1;AT5G58800.2	6.1835	5.76718e-05	0.00132493	1	AT5G58800.1;AT5G58800.2	3.07593	0.0373818	0.361776	0.627076	AT5G58800.1;AT5G58800.2	1.33161	0.459556	0.833286	0.102011	AT5G58800.1;AT5G58800.2	1.58651	0.172354	0.763824	0.258633	AT5G58800.1;AT5G58800.2	1.28657	0.158928	0.74039	0.273945	AT5G58800.1;AT5G58800.2	5.09262	0.0147735
cytosol	AT5G18410.1;AT5G18410.2	| transcription activator | Chr5:6097456-6104783 REVERSE LENGTH=1283 | 201606 [AT5G18410.1,AT5G18410.2]	2	2	1.972	145491	AT5G18410.1;AT5G18410.2	36.5762	0.537934	0.621314	0.0852382	AT5G18410.1;AT5G18410.2	5.80709	0.126485	0.180764	0.324574	AT5G18410.1;AT5G18410.2	9.77091	0.912375	0.94665	0.0509753	AT5G18410.1;AT5G18410.2	6.68739	0.308984	0.43032	0.155056	AT5G18410.1;AT5G18410.2	20.4369	0.0358263	0.353533	0.637766	AT5G18410.1;AT5G18410.2	10.0033	0.640001	0.909774	0.0698566	AT5G18410.1;AT5G18410.2	13.3391	0.111858	0.742917	0.352584	AT5G18410.1;AT5G18410.2	6.29854	0.856075	0.963393	0.0529826	AT5G18410.1;AT5G18410.2	3.74338	0.664513
plastid	AT5G38430.1;AT5G38430.2	| Ribulose bisphosphate carboxylase (small chain) family protein | Chr5:15384350-15385155 REVERSE LENGTH=181 | 201606 [AT5G38430.1,AT5G38430.2]	14	3	19.742	20286.6	AT5G38430.1;AT5G38430.2	36.1253	3.67352e-06	0.000190179	1	AT5G38430.1;AT5G38430.2	27.8831	0.000137656	0.00104882	1	AT5G38430.1;AT5G38430.2	24.0332	7.55466e-05	0.00710322	1	AT5G38430.1;AT5G38430.2	10.5973	2.17939e-06	0.000259079	1	AT5G38430.1;AT5G38430.2	3.24662	0.00477222	0.156467	0.969347	AT5G38430.1;AT5G38430.2	2.02091	0.0107978	0.218582	0.886658	AT5G38430.1;AT5G38430.2	1.34396	0.0599145	0.742917	0.506329	AT5G38430.1;AT5G38430.2	1.2956	0.298321	0.796387	0.161531	AT5G38430.1;AT5G38430.2	1.50314	0.0878333
plastid	AT3G54890.1;AT3G54890.4	| chlorophyll a-b binding protein 6 | Chr3:20339706-20340922 REVERSE LENGTH=241 | 201606 [AT3G54890.1,AT3G54890.4]	4	4	4.985	25996.8	AT3G54890.1;AT3G54890.4	35.848	4.19673e-05	0.000715269	1	AT3G54890.1;AT3G54890.4	28.8835	5.94773e-05	0.000605738	1	AT3G54890.1;AT3G54890.4	27.5661	0.00159824	0.0241634	0.999687	AT3G54890.1;AT3G54890.4	8.26953	0.000547118	0.0050177	0.999978	AT3G54890.1;AT3G54890.4	2.42163	0.0817002	0.4627	0.428035	AT3G54890.1;AT3G54890.4	1.67761	0.104473	0.561179	0.368549	AT3G54890.1;AT3G54890.4	0.780055	0.598067	0.875228	0.0754442	AT3G54890.1;AT3G54890.4	1.24112	0.00172989	0.303032	0.992478	AT3G54890.1;AT3G54890.4	1.30044	0.216138
nucleus	AT4G14540.1;AT5G47640.1	| nuclear factor Y%2C subunit B3 | Chr4:8344663-8345148 FORWARD LENGTH=161 | 201606 [AT4G14540.1,AT5G47640.1]	2	2	1.961	17186.2	AT4G14540.1;AT5G47640.1	35.6469	0.00142071	0.00644071	0.99871	AT4G14540.1;AT5G47640.1	37.3921	0.00235806	0.00756066	0.99396	AT4G14540.1;AT5G47640.1	21.6368	0.398155	0.538861	0.114447	AT4G14540.1;AT5G47640.1	0.700911	0.927691	0.950701	0.050725	AT4G14540.1;AT5G47640.1	3.55584	0.378532	0.744753	0.12607	AT4G14540.1;AT5G47640.1	1.38476	0.513157	0.861664	0.0899902	AT4G14540.1;AT5G47640.1	1.44376	0.715353	0.909146	0.0619233	AT4G14540.1;AT5G47640.1	0.953329	0.985976	0.997232	0.0500279	AT4G14540.1;AT5G47640.1	1.64751	0.145079
plastid	ATCG00580.1	| photosystem II reaction center protein E | ChrC:64071-64322 REVERSE LENGTH=83 | 201606	2	2	1.994	9397.2	ATCG00580.1	35.1587	8.55765e-08	2.89933e-05	1	ATCG00580.1	29.3969	6.12021e-09	4.17464e-06	1	ATCG00580.1	18.2834	0.000399628	0.0133534	1	ATCG00580.1	5.14305	2.12537e-07	0.000133542	1	ATCG00580.1	1.74537	0.0161504	0.266072	0.818064	ATCG00580.1	1.38552	0.00465861	0.14436	0.970756	ATCG00580.1	0.977528	0.714003	0.909146	0.0620443	ATCG00580.1	1.196	0.0399759	0.591426	0.590008	ATCG00580.1	1.92299	0.0259034
plastid	AT1G61520.1;AT1G61520.2;AT1G61520.3	| PSI type III chlorophyll a/b-binding protein | Chr1:22700152-22701149 FORWARD LENGTH=273 | 201606 [AT1G61520.1,AT1G61520.2,AT1G61520.3]	7	6	8.964	29182.9	AT1G61520.1;AT1G61520.2;AT1G61520.3	33.6671	4.56488e-08	2.89933e-05	1	AT1G61520.1;AT1G61520.2;AT1G61520.3	28.906	1.40018e-07	1.87256e-05	1	AT1G61520.1;AT1G61520.2;AT1G61520.3	25.1188	4.48561e-05	0.00584509	1	AT1G61520.1;AT1G61520.2;AT1G61520.3	9.4951	5.433e-06	0.000418341	1	AT1G61520.1;AT1G61520.2;AT1G61520.3	2.48793	0.00906809	0.212839	0.910587	AT1G61520.1;AT1G61520.2;AT1G61520.3	1.78968	0.00263098	0.117286	0.991938	AT1G61520.1;AT1G61520.2;AT1G61520.3	1.10416	0.866714	0.959635	0.052487	AT1G61520.1;AT1G61520.2;AT1G61520.3	1.16471	0.0164375	0.494837	0.784147	AT1G61520.1;AT1G61520.2;AT1G61520.3	1.34031	0.0577498
plastid	AT1G32900.1	| UDP-Glycosyltransferase superfamily protein | Chr1:11920582-11923506 REVERSE LENGTH=610 | 201606	7	6	6.966	66879.4	AT1G32900.1	33.3446	0.000442463	0.00292026	0.999993	AT1G32900.1	19.4622	0.00106511	0.00426547	0.999548	AT1G32900.1	6.61908	0.0264746	0.101927	0.72935	AT1G32900.1	1.89953	0.160991	0.263412	0.272562	AT1G32900.1	1.60587	0.454812	0.788235	0.103205	AT1G32900.1	4.23726	0.132762	0.616643	0.313804	AT1G32900.1	1.70423	0.2136	0.770629	0.217218	AT1G32900.1	1.7133	0.0038216	0.359585	0.964441	AT1G32900.1	5.03765	0.000715229
plastid	AT5G01530.1	| light harvesting complex photosystem II | Chr5:209084-210243 FORWARD LENGTH=290 | 201606	7	5	9.939	31140.7	AT5G01530.1	33.1979	2.03274e-05	0.000476054	1	AT5G01530.1	27.6086	2.69838e-05	0.000374676	1	AT5G01530.1	21.3073	0.000370417	0.0132184	1	AT5G01530.1	8.39455	0.000342841	0.00368673	0.999999	AT5G01530.1	1.89996	0.0968816	0.482632	0.386484	AT5G01530.1	1.68546	0.155177	0.639189	0.280221	AT5G01530.1	0.980498	0.900856	0.967283	0.0513678	AT5G01530.1	1.20245	0.00741927	0.419012	0.907023	AT5G01530.1	1.55805	0.00118941
extracellular	AT1G28400.1	| GATA zinc finger protein | Chr1:9972732-9973739 REVERSE LENGTH=335 | 201606	2	2	1.99	39655.7	AT1G28400.1	32.2802	0.0181021	0.0405622	0.795433	AT1G28400.1	14.6217	0.0374172	0.0649655	0.626837	AT1G28400.1	13.3401	0.083474	0.197778	0.41793	AT1G28400.1	17.5732	0.0292543	0.0736357	0.687717	AT1G28400.1	10.9523	0.0497087	0.3972	0.554297	AT1G28400.1	4.94838	0.0952593	0.540851	0.39054	AT1G28400.1	3.20334	0.153817	0.763824	0.28207	AT1G28400.1	2.20769	0.0168236	0.494837	0.779706	AT1G28400.1	2.41978	0.0212085
plastid	AT3G08940.2	| light harvesting complex photosystem II | Chr3:2717717-2718665 FORWARD LENGTH=287 | 201606	8	6	11.955	31194.7	AT3G08940.2	32.0953	7.78361e-08	2.89933e-05	1	AT3G08940.2	26.6647	1.17651e-06	5.91985e-05	1	AT3G08940.2	18.5842	4.22561e-05	0.00584509	1	AT3G08940.2	7.32134	9.32202e-06	0.000531532	1	AT3G08940.2	2.36618	0.00896416	0.211888	0.912041	AT3G08940.2	1.69679	0.0126771	0.238166	0.861521	AT3G08940.2	1.47963	0.00975967	0.593805	0.900949	AT3G08940.2	1.20367	0.0800788	0.669977	0.42426	AT3G08940.2	1.72703	0.00492173
plastid	AT4G12800.2	| photosystem I subunit l | Chr4:7521283-7522493 FORWARD LENGTH=281 | 201606	6	6	7.929	30442.4	AT4G12800.2	31.7741	1.07791e-07	3.42371e-05	1	AT4G12800.2	25.7963	4.9097e-07	3.60601e-05	1	AT4G12800.2	14.496	0.00020688	0.0106198	1	AT4G12800.2	6.39929	1.38353e-06	0.000226011	1	AT4G12800.2	2.02587	0.0306719	0.33456	0.676229	AT4G12800.2	1.27087	0.0333791	0.371187	0.655416	AT4G12800.2	1.00167	0.983344	0.99601	0.0500383	AT4G12800.2	1.23173	0.0399732	0.591426	0.590024	AT4G12800.2	2.19192	0.00477042
plastid	ATCG00560.1	| photosystem II reaction center protein L | ChrC:63804-63920 REVERSE LENGTH=38 | 201606	4	4	4.984	4470.3	ATCG00560.1	31.7695	0.000136788	0.00141869	1	ATCG00560.1	33.9441	1.94559e-06	7.90998e-05	1	ATCG00560.1	18.3531	0.0610649	0.165099	0.501598	ATCG00560.1	16.5374	1.26424e-05	0.000600453	1	ATCG00560.1	5.47583	2.18555e-05	0.0185116	1	ATCG00560.1	2.80638	0.002783	0.119577	0.990702	ATCG00560.1	1.82655	0.00496299	0.502514	0.966948	ATCG00560.1	0.935937	0.61543	0.893173	0.0735482	ATCG00560.1	1.73101	0.271408
plastid	AT2G39730.1	| rubisco activase | Chr2:16570951-16573345 REVERSE LENGTH=474 | 201606	62	58	85.204	51982	AT2G39730.1	30.1996	5.63937e-08	2.89933e-05	1	AT2G39730.1	27.106	1.73543e-07	2.15109e-05	1	AT2G39730.1	22.5637	0.000283021	0.0117467	1	AT2G39730.1	11.9722	5.67277e-08	7.20725e-05	1	AT2G39730.1	3.60946	6.08859e-05	0.0310873	1	AT2G39730.1	2.40079	6.9522e-05	0.020783	1	AT2G39730.1	1.26764	0.0103744	0.593805	0.892457	AT2G39730.1	1.11413	0.171484	0.746579	0.258862	AT2G39730.1	1.33841	0.17002
plastid	AT1G57770.1	| FAD/NAD(P)-binding oxidoreductase family protein | Chr1:21395254-21398135 FORWARD LENGTH=574 | 201606	3	3	2.91	61725.6	AT1G57770.1	29.715	1.18949e-06	0.000102458	1	AT1G57770.1	27.5592	9.05311e-07	4.89446e-05	1	AT1G57770.1	25.3185	3.25519e-05	0.00529465	1	AT1G57770.1	11.6312	5.59329e-06	0.000419132	1	AT1G57770.1	2.78752	0.0320331	0.341284	0.665586	AT1G57770.1	1.93661	0.00560663	0.155699	0.958584	AT1G57770.1	1.01104	0.867205	0.95966	0.0524685	AT1G57770.1	1.07822	0.320219	0.798124	0.150813	AT1G57770.1	1.17365	0.168522
nucleus	AT5G62190.1	| DEAD box RNA helicase (PRH75) | Chr5:24980542-24983879 REVERSE LENGTH=671 | 201606	2	2	1.873	72893	AT5G62190.1	29.5553	0.000171791	0.00163432	1	AT5G62190.1	31.592	0.000130742	0.0010222	1	AT5G62190.1	16.5723	0.00203852	0.0268387	0.999068	AT5G62190.1	7.04478	0.0019631	0.0114936	0.9964	AT5G62190.1	2.52366	0.514077	0.815109	0.0898054	AT5G62190.1	10.0776	0.162135	0.64524	0.2711	AT5G62190.1	2.33121	0.629416	0.883617	0.0711807	AT5G62190.1	0.935531	0.424792	0.823526	0.112377	AT5G62190.1	1.78341	0.00525265
plastid	ATCG00680.1	| photosystem II reaction center protein B | ChrC:72371-73897 FORWARD LENGTH=508 | 201606	18	17	22.774	56037.9	ATCG00680.1	29.0595	2.42639e-07	4.51577e-05	1	ATCG00680.1	22.699	6.57165e-09	4.17464e-06	1	ATCG00680.1	19.013	0.000101298	0.0074608	1	ATCG00680.1	8.94915	3.9795e-05	0.0011055	1	ATCG00680.1	2.88072	0.0102671	0.223068	0.893933	ATCG00680.1	1.85532	8.52845e-05	0.0240787	1	ATCG00680.1	1.17491	0.0802459	0.742917	0.432487	ATCG00680.1	1.28021	0.0231678	0.525516	0.714408	ATCG00680.1	1.5284	0.0525886
plastid	ATCG00490.1	| ribulose-bisphosphate carboxylase | ChrC:54958-56397 FORWARD LENGTH=479 | 201606	46	45	68.618	52955.6	ATCG00490.1	28.7272	8.0164e-08	2.89933e-05	1	ATCG00490.1	26.4268	1.48535e-08	6.29045e-06	1	ATCG00490.1	18.0856	7.9125e-06	0.00251867	1	ATCG00490.1	8.3466	4.43398e-06	0.000369402	1	ATCG00490.1	2.49271	0.00607095	0.178473	0.952352	ATCG00490.1	1.77891	0.000531148	0.0562353	0.999981	ATCG00490.1	1.28595	0.0782973	0.742917	0.4386	ATCG00490.1	1.08705	0.139557	0.727088	0.300572	ATCG00490.1	1.5884	0.00294177
plastid	ATCG00120.1	| ATP synthase subunit alpha | ChrC:9938-11461 REVERSE LENGTH=507 | 201606	25	24	32.825	55329.8	ATCG00120.1	28.5524	2.49741e-07	4.51577e-05	1	ATCG00120.1	23.4767	4.6768e-09	3.96125e-06	1	ATCG00120.1	17.4048	8.96039e-06	0.00251867	1	ATCG00120.1	6.86479	1.43607e-06	0.000226011	1	ATCG00120.1	2.16287	0.0136365	0.244878	0.849112	ATCG00120.1	1.67256	0.0067145	0.169767	0.943529	ATCG00120.1	1.29068	0.0127933	0.594609	0.860002	ATCG00120.1	1.2162	0.0372983	0.586726	0.606418	ATCG00120.1	1.64048	0.00687436
plastid	AT2G46820.1;AT2G46820.2	| photosystem I P subunit | Chr2:19243729-19244870 FORWARD LENGTH=174 | 201606 [AT2G46820.1,AT2G46820.2]	3	3	3.981	18482.5	AT2G46820.1;AT2G46820.2	28.4029	5.93696e-06	0.000226854	1	AT2G46820.1;AT2G46820.2	25.2144	4.94854e-06	0.000131788	1	AT2G46820.1;AT2G46820.2	14.5045	0.0176886	0.0805614	0.824252	AT2G46820.1;AT2G46820.2	8.1065	0.000176373	0.00250371	1	AT2G46820.1;AT2G46820.2	2.66349	0.0815999	0.4627	0.428339	AT2G46820.1;AT2G46820.2	1.81326	0.143043	0.628254	0.297531	AT2G46820.1;AT2G46820.2	1.07372	0.771169	0.928252	0.0575308	AT2G46820.1;AT2G46820.2	1.12646	0.302975	0.796387	0.159153	AT2G46820.1;AT2G46820.2	1.95821	0.126907
plastid	AT3G18890.1	| NAD(P)-binding Rossmann-fold superfamily protein | Chr3:6511169-6514729 FORWARD LENGTH=641 | 201606	13	13	13.903	68341.9	AT3G18890.1	28.0597	3.5107e-06	0.000187804	1	AT3G18890.1	24.7157	2.95269e-07	2.88569e-05	1	AT3G18890.1	14.5482	0.000567081	0.0153293	1	AT3G18890.1	8.48307	7.15966e-06	0.000491515	1	AT3G18890.1	2.40887	0.0116775	0.2282	0.874762	AT3G18890.1	2.01474	0.00128909	0.0791928	0.999081	AT3G18890.1	1.28252	0.075489	0.742917	0.447725	AT3G18890.1	1.1353	0.356457	0.803914	0.135401	AT3G18890.1	1.92874	0.0344081
plastid	AT4G04640.1	| ATPase%2C F1 complex%2C gamma subunit protein | Chr4:2350761-2351882 REVERSE LENGTH=373 | 201606	14	14	15.882	40911.9	AT4G04640.1	27.5408	3.74176e-08	2.85264e-05	1	AT4G04640.1	23.579	1.83148e-08	6.64826e-06	1	AT4G04640.1	13.7663	0.000448472	0.0139447	1	AT4G04640.1	5.66987	1.51254e-05	0.000630061	1	AT4G04640.1	1.96222	0.0482593	0.394934	0.561904	AT4G04640.1	1.57333	0.000242973	0.0425789	1	AT4G04640.1	1.17854	0.0503247	0.742917	0.55113	AT4G04640.1	1.16802	0.0101608	0.44949	0.865575	AT4G04640.1	2.00059	0.0140284
plastid	AT3G01500.1	| carbonic anhydrase 1 | Chr3:194853-196716 REVERSE LENGTH=270 | 201606	25	15	30.679	29504.5	AT3G01500.1	27.3462	5.26343e-06	0.000216968	1	AT3G01500.1	24.9078	6.07949e-06	0.000155256	1	AT3G01500.1	19.0669	0.000529339	0.0147575	1	AT3G01500.1	10.7589	3.03261e-05	0.000957249	1	AT3G01500.1	2.49949	0.0176007	0.270184	0.801126	AT3G01500.1	2.11176	0.00658446	0.167311	0.945325	AT3G01500.1	1.30963	0.131478	0.749842	0.315953	AT3G01500.1	1.0979	0.0873014	0.677793	0.404183	AT3G01500.1	1.43422	0.0816574
cytosol	AT4G10060.1;AT4G10060.2;AT1G33700.1;AT1G33700.2;AT1G33700.3	| Beta-glucosidase%2C GBA2 type family protein | Chr4:6289355-6295258 FORWARD LENGTH=922 | 201606 [AT4G10060.1,AT4G10060.2]	4	3	3.929	104352	AT4G10060.1;AT4G10060.2;AT1G33700.1;AT1G33700.2;AT1G33700.3	27.1427	0.00122495	0.00583818	0.999235	AT4G10060.1;AT4G10060.2;AT1G33700.1;AT1G33700.2;AT1G33700.3	31.4475	0.000194704	0.00130885	1	AT4G10060.1;AT4G10060.2;AT1G33700.1;AT1G33700.2;AT1G33700.3	18.9509	0.00231268	0.0283114	0.998446	AT4G10060.1;AT4G10060.2;AT1G33700.1;AT1G33700.2;AT1G33700.3	12.8692	0.00112444	0.00791385	0.999444	AT4G10060.1;AT4G10060.2;AT1G33700.1;AT1G33700.2;AT1G33700.3	1.77303	0.230901	0.640786	0.203123	AT4G10060.1;AT4G10060.2;AT1G33700.1;AT1G33700.2;AT1G33700.3	0.945749	0.79513	0.958002	0.0559871	AT4G10060.1;AT4G10060.2;AT1G33700.1;AT1G33700.2;AT1G33700.3	1.44804	0.861597	0.957253	0.0526845	AT4G10060.1;AT4G10060.2;AT1G33700.1;AT1G33700.2;AT1G33700.3	0.863113	0.542853	0.869007	0.0850788	AT4G10060.1;AT4G10060.2;AT1G33700.1;AT1G33700.2;AT1G33700.3	1.43227	0.550641
plastid	AT5G21930.1;AT5G21930.2;AT5G21930.4	| P-type ATPase of Arabidopsis 2 | Chr5:7243129-7248721 FORWARD LENGTH=883 | 201606 [AT5G21930.1,AT5G21930.2,AT5G21930.4]	5	5	4.857	94262.2	AT5G21930.1;AT5G21930.2;AT5G21930.4	27.0989	0.000727229	0.00407473	0.99991	AT5G21930.1;AT5G21930.2;AT5G21930.4	28.4639	0.00070297	0.00312828	0.999923	AT5G21930.1;AT5G21930.2;AT5G21930.4	23.5303	0.00468277	0.0393627	0.984769	AT5G21930.1;AT5G21930.2;AT5G21930.4	10.652	0.00376128	0.0174104	0.981208	AT5G21930.1;AT5G21930.2;AT5G21930.4	1.39349	0.280217	0.681746	0.170348	AT5G21930.1;AT5G21930.2;AT5G21930.4	1.24193	0.533966	0.875359	0.0859687	AT5G21930.1;AT5G21930.2;AT5G21930.4	0.681205	0.760747	0.924897	0.0582643	AT5G21930.1;AT5G21930.2;AT5G21930.4	0.952047	0.577291	0.879999	0.0792057	AT5G21930.1;AT5G21930.2;AT5G21930.4	1.15166	0.315349
mitochondrion	AT2G31790.1	| UDP-Glycosyltransferase superfamily protein | Chr2:13518269-13520167 FORWARD LENGTH=457 | 201606	4	4	3.89	51632.7	AT2G31790.1	27.0036	0.000592127	0.00354023	0.999967	AT2G31790.1	10.2233	0.00206531	0.00683772	0.995828	AT2G31790.1	2.33204	0.12736	0.259096	0.314511	AT2G31790.1	0.793431	0.631262	0.72368	0.0709458	AT2G31790.1	1.21645	0.670041	0.883765	0.0663927	AT2G31790.1	0.474939	0.248691	0.712429	0.190171	AT2G31790.1	0.898737	0.944915	0.982868	0.0504201	AT2G31790.1	2.64137	0.0107096	0.44949	0.857709	AT2G31790.1	11.5794	0.000578193
peroxisome	AT1G07010.1;AT1G07010.2;AT1G07010.3	| Calcineurin-like metallo-phosphoesterase superfamily protein | Chr1:2152949-2154968 FORWARD LENGTH=389 | 201606 [AT1G07010.1,AT1G07010.2,AT1G07010.3]	2	1	1.989	43732.4	AT1G07010.1;AT1G07010.2;AT1G07010.3	26.1978	0.0402151	0.0752202	0.60857	AT1G07010.1;AT1G07010.2;AT1G07010.3	43.6291	0.000685122	0.00307222	0.999932	AT1G07010.1;AT1G07010.2;AT1G07010.3	10.9226	0.0294868	0.108275	0.701427	AT1G07010.1;AT1G07010.2;AT1G07010.3	2.19295	0.794554	0.8564	0.056022	AT1G07010.1;AT1G07010.2;AT1G07010.3	0.206945	0.237837	0.646704	0.197901	AT1G07010.1;AT1G07010.2;AT1G07010.3	2.37979	0.433681	0.816284	0.108816	AT1G07010.1;AT1G07010.2;AT1G07010.3	0.54552	0.380521	0.815263	0.125372	AT1G07010.1;AT1G07010.2;AT1G07010.3	0.600466	0.271373	0.793772	0.176503	AT1G07010.1;AT1G07010.2;AT1G07010.3	2.3985	0.654949
plastid	AT3G25770.1	| allene oxide cyclase 2 | Chr3:9406975-9407839 FORWARD LENGTH=253 | 201606	5	2	4.954	27636.5	AT3G25770.1	25.7705	0.00150459	0.00672502	0.998435	AT3G25770.1	19.9954	0.00206421	0.00683772	0.995834	AT3G25770.1	5.7737	0.0592281	0.162385	0.509986	AT3G25770.1	1.77841	0.127299	0.219747	0.323139	AT3G25770.1	0.917766	0.926217	0.977984	0.050755	AT3G25770.1	0.62196	0.94344	0.990841	0.0504429	AT3G25770.1	0.208354	0.154227	0.763824	0.28151	AT3G25770.1	1.28882	0.00164246	0.303032	0.993329	AT3G25770.1	4.46343	0.00396737
plastid	AT2G34430.1	| light-harvesting chlorophyll-protein complex II subunit B1 | Chr2:14524818-14525618 FORWARD LENGTH=266 | 201606	8	3	9.946	28170.9	AT2G34430.1	25.5357	5.38921e-05	0.000822461	1	AT2G34430.1	21.6825	6.67982e-05	0.000655345	1	AT2G34430.1	13.161	0.00209557	0.0270785	0.998954	AT2G34430.1	5.20336	0.00108611	0.00771975	0.999513	AT2G34430.1	1.57845	0.123179	0.528265	0.33053	AT2G34430.1	1.21089	0.340643	0.766985	0.140654	AT2G34430.1	0.908759	0.960989	0.986815	0.0502104	AT2G34430.1	1.17771	0.0450798	0.605067	0.561346	AT2G34430.1	1.94026	0.0126147
plastid	AT3G46780.1	| plastid transcriptionally active 16 | Chr3:17228766-17231021 FORWARD LENGTH=510 | 201606	19	19	21.853	54358.6	AT3G46780.1	25.4936	7.90691e-08	2.89933e-05	1	AT3G46780.1	21.8564	2.43425e-08	7.44606e-06	1	AT3G46780.1	15.5252	3.82849e-05	0.00555896	1	AT3G46780.1	7.61218	4.11328e-07	0.000188569	1	AT3G46780.1	2.17611	0.00240244	0.110993	0.993649	AT3G46780.1	1.89241	0.00245796	0.113319	0.99325	AT3G46780.1	1.08613	0.373282	0.8138	0.127941	AT3G46780.1	1.16642	0.0416287	0.595819	0.580371	AT3G46780.1	1.64209	0.00939835
plastid	AT1G09340.1;AT1G09340.2	| chloroplast RNA binding protein | Chr1:3015473-3018035 FORWARD LENGTH=378 | 201606 [AT1G09340.1,AT1G09340.2]	17	15	19.883	42621.4	AT1G09340.1;AT1G09340.2	25.0555	5.23371e-07	7.04906e-05	1	AT1G09340.1;AT1G09340.2	20.5206	2.07334e-07	2.34149e-05	1	AT1G09340.1;AT1G09340.2	14.7148	0.000824303	0.0187852	0.999993	AT1G09340.1;AT1G09340.2	7.87241	1.31112e-05	0.000611294	1	AT1G09340.1;AT1G09340.2	2.29448	0.00289018	0.115653	0.989788	AT1G09340.1;AT1G09340.2	1.67919	0.000826608	0.0662312	0.999841	AT1G09340.1;AT1G09340.2	1.04719	0.661548	0.892068	0.0673294	AT1G09340.1;AT1G09340.2	1.22099	0.0356524	0.569902	0.617035	AT1G09340.1;AT1G09340.2	1.70274	0.0573069
plastid	AT1G67090.1	| ribulose bisphosphate carboxylase small chain 1A | Chr1:25048465-25049249 REVERSE LENGTH=180 | 201606	12	7	18.83	20216.6	AT1G67090.1	25.0486	6.88231e-07	7.60345e-05	1	AT1G67090.1	22.8833	4.47321e-07	3.54333e-05	1	AT1G67090.1	17.7235	4.96008e-05	0.00614807	1	AT1G67090.1	7.7392	7.51164e-06	0.000491515	1	AT1G67090.1	2.55756	0.01447	0.255334	0.83858	AT1G67090.1	1.9344	0.00138896	0.0820781	0.998806	AT1G67090.1	1.30165	0.0859342	0.742917	0.415581	AT1G67090.1	1.09462	0.12186	0.71572	0.329408	AT1G67090.1	1.41329	0.0205801
plastid	AT2G21960.1	| transmembrane protein | Chr2:9354990-9356958 FORWARD LENGTH=332 | 201606	5	5	4.973	35807.7	AT2G21960.1	24.8657	0.000151604	0.00150812	1	AT2G21960.1	20.9806	0.00259111	0.00806863	0.992249	AT2G21960.1	10.9983	0.0157378	0.0755385	0.848189	AT2G21960.1	2.27376	0.0417791	0.0955804	0.598851	AT2G21960.1	1.20973	0.388255	0.752359	0.122718	AT2G21960.1	1.32027	0.546719	0.880642	0.0836607	AT2G21960.1	1.08092	0.693634	0.899936	0.0639578	AT2G21960.1	1.18518	0.417969	0.819116	0.114385	AT2G21960.1	2.26086	0.0404936
plastid	ATCG00280.1	| photosystem II reaction center protein C | ChrC:33720-35141 FORWARD LENGTH=473 | 201606	17	14	20.799	51869.4	ATCG00280.1	24.1564	1.40017e-05	0.000384631	1	ATCG00280.1	17.1188	2.31219e-05	0.00034459	1	ATCG00280.1	10.9503	0.000524241	0.0147575	1	ATCG00280.1	6.03957	0.000806248	0.00645865	0.999857	ATCG00280.1	2.01787	0.0464071	0.388199	0.571957	ATCG00280.1	1.51541	0.0880405	0.523633	0.409651	ATCG00280.1	0.931274	0.907229	0.969718	0.0511965	ATCG00280.1	1.4111	1.10764e-05	0.0434214	1	ATCG00280.1	2.206	7.33289e-05
plastid	AT1G06680.1;AT1G06680.2	| photosystem II subunit P-1 | Chr1:2047940-2049186 FORWARD LENGTH=263 | 201606 [AT1G06680.1,AT1G06680.2]	15	15	18.877	28095.4	AT1G06680.1;AT1G06680.2	24.0519	5.57075e-07	7.04906e-05	1	AT1G06680.1;AT1G06680.2	19.6981	7.7742e-09	4.38983e-06	1	AT1G06680.1;AT1G06680.2	15.4116	0.000350014	0.0128896	1	AT1G06680.1;AT1G06680.2	7.62256	2.62774e-07	0.000133542	1	AT1G06680.1;AT1G06680.2	2.48077	0.000145228	0.0369024	1	AT1G06680.1;AT1G06680.2	2.03717	0.000380327	0.0508637	0.999997	AT1G06680.1;AT1G06680.2	1.1827	0.0131856	0.594609	0.854906	AT1G06680.1;AT1G06680.2	1.22103	0.0688869	0.653012	0.459761	AT1G06680.1;AT1G06680.2	1.56064	0.0753466
plastid	AT4G21210.1	| PPDK regulatory protein | Chr4:11307002-11308587 FORWARD LENGTH=403 | 201606	6	5	5.969	43685.2	AT4G21210.1	23.992	0.0001232	0.00132151	1	AT4G21210.1	19.4563	0.000178333	0.00122803	1	AT4G21210.1	12.4922	0.00466948	0.0393627	0.984883	AT4G21210.1	6.37917	0.00116745	0.00803929	0.999359	AT4G21210.1	1.75785	0.104677	0.497499	0.36809	AT4G21210.1	1.10821	0.720652	0.934575	0.0614558	AT4G21210.1	0.782105	0.713242	0.909146	0.0621127	AT4G21210.1	1.23312	0.0997022	0.695384	0.373823	AT4G21210.1	1.92057	0.0359501
plastid	AT1G79040.1	| photosystem II subunit R | Chr1:29736085-29736781 FORWARD LENGTH=140 | 201606	4	4	4.939	14586.2	AT1G79040.1	23.2741	1.43187e-07	3.63839e-05	1	AT1G79040.1	17.9923	6.87282e-07	4.20815e-05	1	AT1G79040.1	12.8237	0.00114626	0.0218072	0.999945	AT1G79040.1	9.25439	3.40612e-05	0.00101823	1	AT1G79040.1	2.91537	0.000126997	0.0369024	1	AT1G79040.1	2.40644	0.00091217	0.0681713	0.999758	AT1G79040.1	1.51849	0.205063	0.769564	0.224802	AT1G79040.1	1.29356	0.0287449	0.559862	0.666746	AT1G79040.1	1.81493	0.0459831
endoplasmic reticulum	AT2G24180.1	| cytochrome p450 71b6 | Chr2:10281890-10283589 FORWARD LENGTH=503 | 201606	3	2	2.945	57011.1	AT2G24180.1	22.8476	0.0034829	0.0119515	0.98415	AT2G24180.1	12.5092	0.0034952	0.0100695	0.984024	AT2G24180.1	12.1308	0.0260079	0.10072	0.733873	AT2G24180.1	5.52046	0.0144114	0.0439607	0.839313	AT2G24180.1	8.47922	0.011594	0.2282	0.875882	AT2G24180.1	3.11183	0.105995	0.562576	0.365147	AT2G24180.1	7.7213	0.024291	0.676948	0.731535	AT2G24180.1	1.82646	0.166695	0.745213	0.264436	AT2G24180.1	1.88343	0.224204
plastid	AT5G66570.1	| PS II oxygen-evolving complex 1 | Chr5:26568744-26570124 FORWARD LENGTH=332 | 201606	25	9	31.516	35142.8	AT5G66570.1	22.7057	2.53505e-07	4.51577e-05	1	AT5G66570.1	19.4409	1.58467e-07	2.06494e-05	1	AT5G66570.1	15.334	0.000373588	0.0132184	1	AT5G66570.1	8.34637	7.08312e-07	0.000191772	1	AT5G66570.1	2.99392	0.000107234	0.0369024	1	AT5G66570.1	2.10765	1.92952e-05	0.0104088	1	AT5G66570.1	1.23413	0.049701	0.742917	0.554336	AT5G66570.1	1.16793	0.113326	0.709634	0.345252	AT5G66570.1	1.48075	0.0921485
plastid	AT3G62410.1	| CP12 domain-containing protein 2 | Chr3:23091006-23091401 FORWARD LENGTH=131 | 201606	3	3	2.916	14166.5	AT3G62410.1	22.6215	6.12499e-07	7.23889e-05	1	AT3G62410.1	18.7836	1.37971e-07	1.87256e-05	1	AT3G62410.1	14.6198	0.00652483	0.0473027	0.966191	AT3G62410.1	9.70842	8.91725e-07	0.000196741	1	AT3G62410.1	3.21218	6.05702e-07	0.00307818	1	AT3G62410.1	2.31778	0.000266963	0.0442638	1	AT3G62410.1	1.60886	0.000427231	0.350906	0.999994	AT3G62410.1	1.20432	0.12452	0.719837	0.324748	AT3G62410.1	1.54732	0.197293
plasma membrane	AT5G54060.1	| UDP-glucose:flavonoid 3-o-glucosyltransferase | Chr5:21936902-21938308 REVERSE LENGTH=468 | 201606	3	3	2.956	52047.8	AT5G54060.1	22.236	0.000384986	0.00268381	0.999997	AT5G54060.1	25.6722	0.000295735	0.00171698	0.999999	AT5G54060.1	10.3619	0.0224934	0.0920384	0.769745	AT5G54060.1	10.7358	0.00012898	0.00211444	1	AT5G54060.1	7.21399	0.00303866	0.119453	0.988464	AT5G54060.1	4.36895	0.00920705	0.200816	0.908644	AT5G54060.1	3.53845	0.380841	0.815263	0.125261	AT5G54060.1	0.866151	0.674536	0.907033	0.0662942	AT5G54060.1	2.14594	0.152849
plastid	AT5G16715.1	| protein EMBRYO DEFECTIVE 2247 | Chr5:5485353-5493229 FORWARD LENGTH=974 | 201606	14	12	14.812	110633	AT5G16715.1	21.8834	0.0037112	0.0125247	0.98175	AT5G16715.1	10.5279	5.4995e-06	0.00014187	1	AT5G16715.1	9.7482	0.000551226	0.0151423	1	AT5G16715.1	6.88894	4.04611e-05	0.0011055	1	AT5G16715.1	2.95059	0.116838	0.521807	0.342548	AT5G16715.1	1.48847	0.0530831	0.454448	0.537406	AT5G16715.1	1.31708	0.14	0.751498	0.302182	AT5G16715.1	2.0786	0.366427	0.803914	0.131596	AT5G16715.1	2.24486	0.368761
plastid	ATCG00480.1	| ATP synthase subunit beta | ChrC:52660-54156 REVERSE LENGTH=498 | 201606	56	54	73.38	53934.8	ATCG00480.1	21.8407	6.74197e-07	7.60345e-05	1	ATCG00480.1	18.8036	5.05277e-07	3.61665e-05	1	ATCG00480.1	13.7034	0.000269344	0.0115026	1	ATCG00480.1	6.72994	7.93078e-06	0.000491515	1	ATCG00480.1	2.15401	0.0186173	0.274241	0.789668	ATCG00480.1	1.7435	0.00329499	0.121667	0.986036	ATCG00480.1	1.05938	0.597883	0.875228	0.0754707	ATCG00480.1	1.16152	0.0323389	0.560798	0.639767	ATCG00480.1	1.59381	0.0314601
plasma membrane	AT4G27560.1;AT3G29630.1;AT3G29630.2;AT4G27570.1	| UDP-Glycosyltransferase superfamily protein | Chr4:13760114-13761481 REVERSE LENGTH=455 | 201606	2	2	1.971	50615	AT4G27560.1;AT3G29630.1;AT3G29630.2;AT4G27570.1	21.7924	0.000287593	0.00223264	1	AT4G27560.1;AT3G29630.1;AT3G29630.2;AT4G27570.1	13.6991	0.000713857	0.00317117	0.999918	AT4G27560.1;AT3G29630.1;AT3G29630.2;AT4G27570.1	6.95796	0.138943	0.272422	0.294968	AT4G27560.1;AT3G29630.1;AT3G29630.2;AT4G27570.1	6.03287	0.00483382	0.020678	0.968577	AT4G27560.1;AT3G29630.1;AT3G29630.2;AT4G27570.1	3.4155	0.0168219	0.266072	0.810134	AT4G27560.1;AT3G29630.1;AT3G29630.2;AT4G27570.1	2.9303	0.0200962	0.29517	0.773591	AT4G27560.1;AT3G29630.1;AT3G29630.2;AT4G27570.1	1.12861	0.689268	0.898921	0.0643903	AT4G27560.1;AT3G29630.1;AT3G29630.2;AT4G27570.1	1.59079	0.0175901	0.494837	0.771063	AT4G27560.1;AT3G29630.1;AT3G29630.2;AT4G27570.1	3.13201	0.0689864
mitochondrion,cytosol	AT4G35830.1	| aconitase 1 | Chr4:16973007-16977949 REVERSE LENGTH=898 | 201606	32	22	36.698	98153.3	AT4G35830.1	21.5973	0.000214423	0.00183899	1	AT4G35830.1	18.9395	0.000118837	0.000960143	1	AT4G35830.1	8.90499	0.00372118	0.0357051	0.992029	AT4G35830.1	4.99513	0.000572498	0.00513128	0.999972	AT4G35830.1	2.15009	0.0172428	0.267159	0.805241	AT4G35830.1	1.19793	0.591201	0.894785	0.0764501	AT4G35830.1	1.45987	0.186006	0.763824	0.243494	AT4G35830.1	1.14033	0.717076	0.923604	0.0620619	AT4G35830.1	2.42531	0.0471994
plastid	AT3G50820.1	| photosystem II subunit O-2 | Chr3:18891008-18892311 REVERSE LENGTH=331 | 201606	24	8	28.564	35019.9	AT3G50820.1	21.5002	1.96709e-07	4.51577e-05	1	AT3G50820.1	18.2447	6.46503e-08	1.21686e-05	1	AT3G50820.1	15.0213	0.000599303	0.0155461	0.999999	AT3G50820.1	8.54241	1.63023e-07	0.000133542	1	AT3G50820.1	2.85019	0.000139794	0.0369024	1	AT3G50820.1	1.96874	1.76096e-05	0.0104088	1	AT3G50820.1	1.18763	0.23164	0.780335	0.202555	AT3G50820.1	1.17844	0.0738163	0.658295	0.443394	AT3G50820.1	1.43132	0.133159
plastid	ATCG00350.1	| Photosystem I%2C PsaA/PsaB protein | ChrC:39605-41857 REVERSE LENGTH=750 | 201606	5	4	4.967	83233.3	ATCG00350.1	21.0239	1.05292e-06	9.38761e-05	1	ATCG00350.1	26.0846	3.91481e-06	0.000114084	1	ATCG00350.1	25.2704	0.000531139	0.0147575	1	ATCG00350.1	17.6974	7.21524e-05	0.00149567	1	ATCG00350.1	7.70961	0.000644009	0.0775005	0.999949	ATCG00350.1	5.11013	0.00529008	0.152423	0.962744	ATCG00350.1	1.8573	0.0225966	0.659975	0.747921	ATCG00350.1	0.805988	0.187991	0.756707	0.241149	ATCG00350.1	0.831957	0.722198
plastid	AT5G24020.1	| septum site-determining protein (MIND) | Chr5:8116731-8117711 FORWARD LENGTH=326 | 201606	2	2	1.971	35691.6	AT5G24020.1	20.7481	0.00456524	0.0144404	0.971901	AT5G24020.1	16.7762	0.0997499	0.148225	0.379511	AT5G24020.1	13.1264	0.0228637	0.0927321	0.76581	AT5G24020.1	11.3855	0.0102823	0.0345373	0.893724	AT5G24020.1	5.89633	0.064726	0.433916	0.486599	AT5G24020.1	2.08059	0.951278	0.992216	0.0503284	AT5G24020.1	3.38258	0.179676	0.763824	0.250313	AT5G24020.1	1.23676	0.360613	0.803914	0.133794	AT5G24020.1	1.58064	0.0563062
plastid	ATCG00130.1	| ATPase%2C F0 complex%2C subunit B/B'%2C bacterial/chloroplast | ChrC:11529-12798 REVERSE LENGTH=184 | 201606	9	6	9.97	21057.8	ATCG00130.1	20.7222	4.69498e-05	0.000758777	1	ATCG00130.1	18.8925	3.79324e-05	0.000464405	1	ATCG00130.1	7.58246	0.0093583	0.0568207	0.93121	ATCG00130.1	2.62116	0.00521458	0.0216862	0.963724	ATCG00130.1	1.36787	0.368211	0.739322	0.129792	ATCG00130.1	1.47785	0.160309	0.643943	0.273441	ATCG00130.1	1.30551	0.233451	0.7831	0.201177	ATCG00130.1	1.09685	0.374333	0.804409	0.128699	ATCG00130.1	2.73292	0.0142684
plastid	AT5G38420.1	| Ribulose bisphosphate carboxylase (small chain) family protein | Chr5:15381203-15381978 REVERSE LENGTH=181 | 201606	14	3	20.744	20350.6	AT5G38420.1	20.4827	3.63178e-05	0.000656821	1	AT5G38420.1	19.9358	2.2711e-05	0.000340464	1	AT5G38420.1	14.3047	0.000511355	0.0147575	1	AT5G38420.1	6.36066	0.00024361	0.00306249	1	AT5G38420.1	2.09303	0.0650797	0.433916	0.485212	AT5G38420.1	1.58538	0.0501354	0.445616	0.552099	AT5G38420.1	1.00759	0.810908	0.941735	0.0550758	AT5G38420.1	1.02743	0.854375	0.962972	0.0530546	AT5G38420.1	1.43188	0.0508733
plastid	AT5G67030.1;AT5G67030.2	| zeaxanthin epoxidase (ZEP) (ABA1) | Chr5:26753745-26757090 REVERSE LENGTH=667 | 201606	14	14	15.905	73843.7	AT5G67030.1;AT5G67030.2	20.3196	5.21436e-06	0.000216968	1	AT5G67030.1;AT5G67030.2	18.4199	2.10976e-06	8.25915e-05	1	AT5G67030.1;AT5G67030.2	11.533	0.00437161	0.038442	0.987341	AT5G67030.1;AT5G67030.2	7.17298	2.55322e-05	0.00086706	1	AT5G67030.1;AT5G67030.2	2.52242	0.0613208	0.428428	0.500392	AT5G67030.1;AT5G67030.2	2.26447	0.00201344	0.100639	0.996123	AT5G67030.1;AT5G67030.2	1.55517	0.324626	0.802443	0.147656	AT5G67030.1;AT5G67030.2	1.10313	0.34174	0.803914	0.141344	AT5G67030.1;AT5G67030.2	1.76187	0.0947657
plastid	AT3G53470.1;AT3G53470.2	| 2%2C3-bisphosphoglycerate-independent phosphoglycerate mutase | Chr3:19822813-19823298 FORWARD LENGTH=135 | 201606 [AT3G53470.1,AT3G53470.2]	2	2	1.988	15376.3	AT3G53470.1;AT3G53470.2	19.7233	4.11207e-05	0.000708376	1	AT3G53470.1;AT3G53470.2	12.1899	0.0012309	0.00468924	0.999222	AT3G53470.1;AT3G53470.2	14.3132	0.00139349	0.0229926	0.999841	AT3G53470.1;AT3G53470.2	5.60729	0.000563606	0.00509653	0.999974	AT3G53470.1;AT3G53470.2	1.14663	0.555344	0.833627	0.0821635	AT3G53470.1;AT3G53470.2	2.65887	0.0535644	0.454448	0.535085	AT3G53470.1;AT3G53470.2	2.17591	0.0803436	0.742917	0.432185	AT3G53470.1;AT3G53470.2	1.618	0.0944035	0.687198	0.386222	AT3G53470.1;AT3G53470.2	1.37798	0.18843
plastid	ATCG00270.1	| photosystem II reaction center protein D | ChrC:32711-33772 FORWARD LENGTH=353 | 201606	11	11	12.944	39548.8	ATCG00270.1	19.5775	2.50654e-07	4.51577e-05	1	ATCG00270.1	15.4666	7.90484e-08	1.38526e-05	1	ATCG00270.1	9.23204	0.000112257	0.00792347	1	ATCG00270.1	6.36037	4.30132e-05	0.00116273	1	ATCG00270.1	2.30857	0.0121151	0.230046	0.868927	ATCG00270.1	1.68076	0.00014824	0.035874	1	ATCG00270.1	1.02265	0.871254	0.961674	0.0523184	ATCG00270.1	1.26579	0.0108297	0.44949	0.856007	ATCG00270.1	2.12061	0.00213126
plastid	ATCG00520.1	| unfolded protein binding protein | ChrC:59772-60326 FORWARD LENGTH=184 | 201606	3	2	2.984	21408.4	ATCG00520.1	19.0999	5.42272e-05	0.000825098	1	ATCG00520.1	15.4525	5.37054e-05	0.000572182	1	ATCG00520.1	21.2706	0.00172862	0.0247344	0.999548	ATCG00520.1	8.45925	0.000337291	0.00365482	0.999999	ATCG00520.1	2.39917	0.189312	0.608018	0.240061	ATCG00520.1	2.40618	0.344294	0.768087	0.139133	ATCG00520.1	1.62537	0.399868	0.819023	0.1189	ATCG00520.1	1.23604	0.102508	0.695384	0.367569	ATCG00520.1	0.897951	0.955869
plastid	AT1G18060.1	| microbial collagenase | Chr1:6212065-6213314 REVERSE LENGTH=226 | 201606	3	3	2.991	25199.2	AT1G18060.1	18.7701	0.00938927	0.0246468	0.906101	AT1G18060.1	15.7518	0.0103894	0.0231575	0.89225	AT1G18060.1	16.793	0.0285185	0.106401	0.71017	AT1G18060.1	6.78201	0.028714	0.0725633	0.692208	AT1G18060.1	3.8282	0.261987	0.664764	0.181367	AT1G18060.1	1.15593	0.753998	0.944961	0.05876	AT1G18060.1	0.964148	0.628249	0.882796	0.0713302	AT1G18060.1	1.19162	0.520905	0.853972	0.0892478	AT1G18060.1	1.11773	0.710522
nucleus	AT2G16440.1	| Minichromosome maintenance (MCM2/3/5) family protein | Chr2:7126536-7130665 REVERSE LENGTH=847 | 201606	2	1	1.9	93659.4	AT2G16440.1	18.5169	0.0315808	0.0624733	0.669082	AT2G16440.1	5.1189	0.0504946	0.0837238	0.550263	AT2G16440.1	4.9057	0.497583	0.626872	0.0898793	AT2G16440.1	0.198832	0.765047	0.831927	0.057957	AT2G16440.1	0.385875	0.860789	0.955543	0.0527164	AT2G16440.1	0	0.285591	0.733317	0.167308	AT2G16440.1	0	0.285591	0.789232	0.167308	AT2G16440.1	3.61735	0.0435578	0.603514	0.569562	AT2G16440.1	3.77456	0.174132
plastid	AT2G21330.1	| fructose-bisphosphate aldolase 1 | Chr2:9128416-9130152 REVERSE LENGTH=399 | 201606	27	11	33.776	42931.5	AT2G21330.1	18.1625	1.44671e-06	0.000111508	1	AT2G21330.1	16.4334	1.70696e-06	7.22883e-05	1	AT2G21330.1	10.4774	0.000323275	0.0122603	1	AT2G21330.1	7.30722	2.40393e-05	0.000831074	1	AT2G21330.1	2.20141	0.0140347	0.250241	0.844051	AT2G21330.1	1.77022	0.00555032	0.155216	0.95933	AT2G21330.1	1.12915	0.291787	0.789608	0.163913	AT2G21330.1	1.10522	0.00269041	0.335811	0.980999	AT2G21330.1	1.73349	0.00723478
plastid	AT3G10230.1	| lycopene cyclase | Chr3:3164340-3165845 REVERSE LENGTH=501 | 201606	2	2	1.994	56177.5	AT3G10230.1	18.0339	0.000251161	0.00203344	1	AT3G10230.1	15.8355	0.000179578	0.00123493	1	AT3G10230.1	11.8245	0.00337647	0.0341285	0.994095	AT3G10230.1	4.76186	0.00238984	0.01306	0.993738	AT3G10230.1	2.42611	0.253148	0.657008	0.187142	AT3G10230.1	1.93154	0.086755	0.521035	0.41325	AT3G10230.1	1.13814	0.487216	0.842546	0.0954872	AT3G10230.1	1.13883	0.465273	0.837165	0.101551	AT3G10230.1	1.52513	0.126402
extracellular	AT5G65730.1	| xyloglucan endotransglucosylase/hydrolase 6 | Chr5:26299080-26300290 FORWARD LENGTH=292 | 201606	3	2	3.981	33692.7	AT5G65730.1	17.5484	2.1004e-05	0.00048242	1	AT5G65730.1	17.6158	4.59323e-06	0.000126863	1	AT5G65730.1	8.15033	0.00259699	0.0296582	0.99759	AT5G65730.1	4.5359	9.49455e-05	0.00176745	1	AT5G65730.1	1.45202	0.0409527	0.37635	0.603944	AT5G65730.1	1.91355	0.147552	0.63122	0.290877	AT5G65730.1	2.09641	0.190933	0.763824	0.238408	AT5G65730.1	0.996175	0.898516	0.977745	0.0514715	AT5G65730.1	2.1531	0.0329862
cytosol	AT2G01520.1	| MLP-like protein 328 | Chr2:235992-236881 FORWARD LENGTH=151 | 201606	9	4	11.951	17513	AT2G01520.1	16.8789	3.09449e-05	0.000604382	1	AT2G01520.1	8.11997	0.000568519	0.0027002	0.999973	AT2G01520.1	2.8473	0.102218	0.225074	0.366686	AT2G01520.1	1.45801	0.0980408	0.17956	0.383636	AT2G01520.1	1.2478	0.341765	0.720973	0.140184	AT2G01520.1	1.19945	0.500614	0.855237	0.0925777	AT2G01520.1	2.84824	0.166065	0.763824	0.266181	AT2G01520.1	2.07869	0.00327546	0.335811	0.972699	AT2G01520.1	5.92804	0.00195525
plastid	AT3G45140.1	| lipoxygenase 2 | Chr3:16525437-16529233 FORWARD LENGTH=896 | 201606	27	26	28.703	102049	AT3G45140.1	16.7933	2.054e-05	0.000478827	1	AT3G45140.1	11.163	3.89558e-05	0.00047362	1	AT3G45140.1	5.61542	0.00142405	0.0230673	0.999823	AT3G45140.1	1.32863	0.133408	0.228199	0.312733	AT3G45140.1	0.913669	0.719168	0.90131	0.0615857	AT3G45140.1	2.00608	0.153699	0.639189	0.28223	AT3G45140.1	1.59637	0.620493	0.880641	0.0723411	AT3G45140.1	1.50437	0.00254283	0.335811	0.982968	AT3G45140.1	2.99057	0.000163955
plastid	AT2G37240.1	| Thioredoxin superfamily protein | Chr2:15640235-15641720 REVERSE LENGTH=248 | 201606	2	1	1.934	26605	AT2G37240.1	16.62	0.000222928	0.00188522	1	AT2G37240.1	17.1077	0.000117369	0.000954354	1	AT2G37240.1	11.6544	0.0200375	0.0857884	0.796799	AT2G37240.1	8.91755	0.000285351	0.00327349	1	AT2G37240.1	3.55247	0.0163024	0.266072	0.816256	AT2G37240.1	2.44785	0.0589262	0.465529	0.51059	AT2G37240.1	1.23954	0.384643	0.817206	0.123946	AT2G37240.1	0.971495	0.774995	0.940021	0.0574566	AT2G37240.1	1.42607	0.293875
plastid	AT1G13930.1;AT1G13930.2;AT1G13930.3	| oleosin-B3-like protein | Chr1:4761091-4761558 FORWARD LENGTH=155 | 201606 [AT1G13930.1,AT1G13930.2,AT1G13930.3]	16	16	17.731	16164	AT1G13930.1;AT1G13930.2;AT1G13930.3	16.6145	3.72998e-06	0.000190179	1	AT1G13930.1;AT1G13930.2;AT1G13930.3	12.8316	1.90296e-07	2.24903e-05	1	AT1G13930.1;AT1G13930.2;AT1G13930.3	8.36152	0.00405388	0.0366581	0.989753	AT1G13930.1;AT1G13930.2;AT1G13930.3	4.80667	6.08805e-07	0.000191772	1	AT1G13930.1;AT1G13930.2;AT1G13930.3	4.31831	5.8989e-06	0.0126608	1	AT1G13930.1;AT1G13930.2;AT1G13930.3	3.38771	0.00209913	0.100639	0.995629	AT1G13930.1;AT1G13930.2;AT1G13930.3	1.24196	0.0258908	0.699879	0.71676	AT1G13930.1;AT1G13930.2;AT1G13930.3	1.29481	0.0799261	0.669977	0.424706	AT1G13930.1;AT1G13930.2;AT1G13930.3	1.98701	0.0554567
plastid	AT1G12900.1;AT1G12900.3;AT1G12900.4;AT1G12900.5	| glyceraldehyde 3-phosphate dehydrogenase A subunit 2 | Chr1:4392634-4394283 REVERSE LENGTH=399 | 201606 [AT1G12900.1,AT1G12900.3,AT1G12900.4,AT1G12900.5]	22	5	30.77	42847.2	AT1G12900.1;AT1G12900.3;AT1G12900.4;AT1G12900.5	16.5778	1.1904e-07	3.45358e-05	1	AT1G12900.1;AT1G12900.3;AT1G12900.4;AT1G12900.5	13.815	2.58262e-08	7.44606e-06	1	AT1G12900.1;AT1G12900.3;AT1G12900.4;AT1G12900.5	10.6559	6.17864e-05	0.00668082	1	AT1G12900.1;AT1G12900.3;AT1G12900.4;AT1G12900.5	5.6668	7.92377e-06	0.000491515	1	AT1G12900.1;AT1G12900.3;AT1G12900.4;AT1G12900.5	1.98124	0.00273593	0.114909	0.991093	AT1G12900.1;AT1G12900.3;AT1G12900.4;AT1G12900.5	1.51083	0.00130897	0.0791928	0.999029	AT1G12900.1;AT1G12900.3;AT1G12900.4;AT1G12900.5	1.15427	0.107136	0.742917	0.362634	AT1G12900.1;AT1G12900.3;AT1G12900.4;AT1G12900.5	1.19999	0.0146012	0.487102	0.806113	AT1G12900.1;AT1G12900.3;AT1G12900.4;AT1G12900.5	1.55574	0.0129
peroxisome	AT2G13360.1;AT2G13360.2;AT2G13360.3	| alanine:glyoxylate aminotransferase | Chr2:5539417-5540902 REVERSE LENGTH=401 | 201606 [AT2G13360.1,AT2G13360.2,AT2G13360.3]	11	11	12.936	44209.1	AT2G13360.1;AT2G13360.2;AT2G13360.3	16.3945	6.49533e-06	0.000236928	1	AT2G13360.1;AT2G13360.2;AT2G13360.3	15.4113	2.41882e-05	0.000351543	1	AT2G13360.1;AT2G13360.2;AT2G13360.3	15.656	0.000331523	0.0122978	1	AT2G13360.1;AT2G13360.2;AT2G13360.3	6.56332	5.60174e-05	0.00130498	1	AT2G13360.1;AT2G13360.2;AT2G13360.3	2.31098	0.00940052	0.214669	0.905945	AT2G13360.1;AT2G13360.2;AT2G13360.3	1.42002	0.165897	0.650531	0.266388	AT2G13360.1;AT2G13360.2;AT2G13360.3	1.38275	0.0946347	0.742917	0.392123	AT2G13360.1;AT2G13360.2;AT2G13360.3	1.06379	0.568781	0.87778	0.0805857	AT2G13360.1;AT2G13360.2;AT2G13360.3	1.04717	0.668407
mitochondrion	AT5G20935.1	| DUF3148 family protein | Chr5:7103448-7103945 FORWARD LENGTH=121 | 201606	2	2	1.994	13273.8	AT5G20935.1	16.1608	1.34766e-06	0.000107012	1	AT5G20935.1	14.6526	2.00374e-06	7.95548e-05	1	AT5G20935.1	15.6238	5.8853e-05	0.00664646	1	AT5G20935.1	8.24798	3.13975e-06	0.000306418	1	AT5G20935.1	2.89461	0.00872798	0.209954	0.91535	AT5G20935.1	2.26049	0.00788072	0.184324	0.927244	AT5G20935.1	1.53086	0.195249	0.763987	0.234104	AT5G20935.1	1.10293	0.221636	0.778246	0.210904	AT5G20935.1	1.03438	0.710377
plastid	AT2G20260.1	| photosystem I subunit E-2 | Chr2:8736780-8737644 FORWARD LENGTH=145 | 201606	5	4	5.981	15189.4	AT2G20260.1	16.1328	5.68697e-07	7.04906e-05	1	AT2G20260.1	13.0413	3.32407e-07	3.12832e-05	1	AT2G20260.1	7.2073	0.000899931	0.0192413	0.999987	AT2G20260.1	4.79606	2.55921e-05	0.00086706	1	AT2G20260.1	1.78857	0.00738139	0.198753	0.934244	AT2G20260.1	1.43187	0.0099583	0.209132	0.898197	AT2G20260.1	1.06363	0.458391	0.838136	0.102302	AT2G20260.1	1.23705	0.00932411	0.44035	0.877852	AT2G20260.1	2.2384	0.0055071
plastid	AT4G37925.1	| subunit NDH-M of NAD(P)H:plastoquinone dehydrogenase complex | Chr4:17830748-17831485 REVERSE LENGTH=217 | 201606	7	7	6.956	24794.9	AT4G37925.1	15.9782	6.23443e-06	0.000232966	1	AT4G37925.1	14.996	4.01829e-07	3.2937e-05	1	AT4G37925.1	14.8104	7.96546e-05	0.00710322	1	AT4G37925.1	6.61668	3.63657e-05	0.00106827	1	AT4G37925.1	1.98691	0.00239688	0.110993	0.993689	AT4G37925.1	1.7541	0.000847113	0.0662312	0.999823	AT4G37925.1	1.30962	0.0472863	0.742917	0.567137	AT4G37925.1	1.0655	0.690937	0.914456	0.0645712	AT4G37925.1	1.07885	0.672506
plastid	ATCG00900.1;ATCG01240.1	| Ribosomal protein S7p/S5e family protein | ChrC:97478-97945 REVERSE LENGTH=155 | 201606 [ATCG00900.1,ATCG01240.1]	4	4	4.982	17358	ATCG00900.1;ATCG01240.1	15.9617	6.82223e-06	0.000240768	1	ATCG00900.1;ATCG01240.1	13.3871	8.60662e-07	4.7031e-05	1	ATCG00900.1;ATCG01240.1	11.0014	0.00169887	0.0247159	0.999582	ATCG00900.1;ATCG01240.1	3.90526	0.000225928	0.00287041	1	ATCG00900.1;ATCG01240.1	2.76615	0.0920971	0.476673	0.39869	ATCG00900.1;ATCG01240.1	1.64396	0.0144894	0.250337	0.838337	ATCG00900.1;ATCG01240.1	1.29001	0.0508354	0.742917	0.548533	ATCG00900.1;ATCG01240.1	1.19232	0.226514	0.7799	0.207054	ATCG00900.1;ATCG01240.1	1.45088	0.172946
nucleus	AT3G57040.1;AT3G57040.2	| response regulator 9 | Chr3:21110059-21111228 FORWARD LENGTH=234 | 201606 [AT3G57040.1,AT3G57040.2]	2	2	1.92	26089.3	AT3G57040.1;AT3G57040.2	15.9484	0.024164	0.0509098	0.732736	AT3G57040.1;AT3G57040.2	1.82081	0.15686	0.216151	0.277965	AT3G57040.1;AT3G57040.2	0.576892	0.336189	0.482631	0.136313	AT3G57040.1;AT3G57040.2	0.881656	0.978134	0.985308	0.0500661	AT3G57040.1;AT3G57040.2	1.10199	0.510484	0.813543	0.0905309	AT3G57040.1;AT3G57040.2	1.5112	0.496697	0.855237	0.0934124	AT3G57040.1;AT3G57040.2	0.547097	0.261314	0.78813	0.181796	AT3G57040.1;AT3G57040.2	8.75896	0.0330197	0.564761	0.634939	AT3G57040.1;AT3G57040.2	27.6454	0.0143311
plastid	AT1G64355.1	| 1-acyl-sn-glycerol-3-phosphate acyltransferase | Chr1:23886152-23886987 FORWARD LENGTH=199 | 201606	2	2	1.994	21865	AT1G64355.1	15.8862	3.12681e-05	0.000604382	1	AT1G64355.1	12.941	8.82509e-06	0.000189237	1	AT1G64355.1	4.28547	0.592857	0.70992	0.0740895	AT1G64355.1	4.59572	0.000488967	0.00464473	0.999988	AT1G64355.1	1.87763	0.0850726	0.4679	0.418056	AT1G64355.1	1.47425	0.0507078	0.44737	0.549179	AT1G64355.1	1.44952	0.0250705	0.684991	0.724254	AT1G64355.1	1.22759	0.262807	0.787478	0.18174	AT1G64355.1	3.707	0.20147
plastid	AT1G52230.1;AT3G16140.1	| photosystem I subunit H2 | Chr1:19454902-19455508 FORWARD LENGTH=145 | 201606 [AT1G52230.1,AT3G16140.1]	3	3	3.988	15274.5	AT1G52230.1;AT3G16140.1	15.7081	0.000746976	0.00413973	0.999898	AT1G52230.1;AT3G16140.1	16.1127	0.000765836	0.00331232	0.999886	AT1G52230.1;AT3G16140.1	17.648	0.00498309	0.0405793	0.982106	AT1G52230.1;AT3G16140.1	7.60811	0.00293516	0.0150084	0.989394	AT1G52230.1;AT3G16140.1	2.58135	0.0556593	0.417198	0.525226	AT1G52230.1;AT3G16140.1	1.81748	0.179915	0.660004	0.25005	AT1G52230.1;AT3G16140.1	1.81167	0.389975	0.81822	0.122141	AT1G52230.1;AT3G16140.1	0.97489	0.766558	0.939658	0.0580501	AT1G52230.1;AT3G16140.1	0.890076	0.80086
plastid	AT2G35800.1	| mitochondrial substrate carrier family protein | Chr2:15044437-15048352 FORWARD LENGTH=823 | 201606	2	2	1.911	90629.2	AT2G35800.1	15.4026	0.0917913	0.147156	0.399496	AT2G35800.1	16.6443	0.0810108	0.12423	0.430134	AT2G35800.1	12.6541	0.171534	0.309896	0.250456	AT2G35800.1	6.47641	0.132078	0.226228	0.314945	AT2G35800.1	4.82021	0.175142	0.599375	0.255408	AT2G35800.1	2.13802	0.759744	0.947304	0.0583369	AT2G35800.1	2.96919	0.201697	0.768468	0.227919	AT2G35800.1	0.925394	0.616371	0.893973	0.0734188	AT2G35800.1	1.2172	0.655268
plastid	AT5G43750.1	| NAD(P)H dehydrogenase 18 | Chr5:17580100-17581145 REVERSE LENGTH=212 | 201606	4	3	3.935	23746.9	AT5G43750.1	15.2254	2.46534e-06	0.000149153	1	AT5G43750.1	14.4824	2.56719e-09	3.96125e-06	1	AT5G43750.1	10.488	5.39032e-05	0.0063706	1	AT5G43750.1	5.41172	1.02723e-06	0.000196741	1	AT5G43750.1	1.91601	0.0123564	0.232574	0.865735	AT5G43750.1	1.16195	0.278387	0.732658	0.171403	AT5G43750.1	1.02069	0.902778	0.968732	0.0513149	AT5G43750.1	1.05131	0.704056	0.919189	0.0632764	AT5G43750.1	1.4517	0.0571289
mitochondrion	AT4G14090.1	| UDP-Glycosyltransferase superfamily protein | Chr4:8122434-8123804 REVERSE LENGTH=456 | 201606	2	2	1.967	50703.3	AT4G14090.1	15.0923	0.0209382	0.0455513	0.76474	AT4G14090.1	7.97317	0.0421976	0.0719143	0.596308	AT4G14090.1	0	0.00927922	0.0566572	0.932237	AT4G14090.1	2.07235	0.168186	0.271684	0.263592	AT4G14090.1	7.12276	0.334461	0.718095	0.143292	AT4G14090.1	0.513301	0.390939	0.797253	0.121818	AT4G14090.1	7.25518	0.747739	0.920528	0.0592343	AT4G14090.1	1.89288	0.224085	0.778246	0.208957	AT4G14090.1	Infinite (div by 0)	6.50932e-07
mitochondrion	AT2G34050.1	| ATP synthase F1 complex assembly factor | Chr2:14382843-14384198 REVERSE LENGTH=248 | 201606	2	2	1.835	28379.7	AT2G34050.1	15.0173	1.71847e-06	0.000123004	1	AT2G34050.1	14.8126	2.37862e-06	8.87068e-05	1	AT2G34050.1	10.9576	0.000661129	0.0162271	0.999999	AT2G34050.1	4.30885	8.63341e-05	0.00168103	1	AT2G34050.1	1.08792	0.495913	0.803969	0.0935811	AT2G34050.1	0.935055	0.688268	0.927152	0.0644906	AT2G34050.1	1.11048	0.595384	0.875228	0.0758341	AT2G34050.1	1.01382	0.812849	0.95251	0.0550978	AT2G34050.1	1.37049	0.111925
plastid	AT5G57030.1	| Lycopene beta/epsilon cyclase protein | Chr5:23077398-23079818 FORWARD LENGTH=524 | 201606	5	4	4.877	58492.6	AT5G57030.1	14.8833	3.90089e-05	0.000683597	1	AT5G57030.1	10.4376	0.000312847	0.0017884	0.999999	AT5G57030.1	5.87072	0.0501127	0.147413	0.556249	AT5G57030.1	5.11364	0.000463591	0.00447053	0.999991	AT5G57030.1	1.4186	0.318178	0.703341	0.150636	AT5G57030.1	2.55977	0.00182165	0.0974487	0.997123	AT5G57030.1	1.37397	0.265738	0.789232	0.179005	AT5G57030.1	1.42593	0.17219	0.746579	0.258058	AT5G57030.1	2.53518	0.0660415
plasma membrane	AT1G64500.1	| Glutaredoxin family protein | Chr1:23953270-23954376 FORWARD LENGTH=368 | 201606	4	4	3.915	41015.8	AT1G64500.1	14.8336	0.0175283	0.0395378	0.801955	AT1G64500.1	11.2612	0.0766104	0.118736	0.444036	AT1G64500.1	10.4796	0.160501	0.296822	0.264062	AT1G64500.1	9.25284	0.0280865	0.0715826	0.697505	AT1G64500.1	2.132	0.301282	0.692285	0.158924	AT1G64500.1	3.92368	0.082527	0.513344	0.425545	AT1G64500.1	3.03503	0.102949	0.742917	0.372018	AT1G64500.1	1.31723	0.365753	0.803914	0.131848	AT1G64500.1	1.41548	0.335717
mitochondrion	AT1G28960.1;AT1G28960.3;AT1G28960.5	| nudix hydrolase homolog 15 | Chr1:10110135-10111607 REVERSE LENGTH=293 | 201606 [AT1G28960.1,AT1G28960.3,AT1G28960.5]	3	3	2.941	32825.6	AT1G28960.1;AT1G28960.3;AT1G28960.5	14.7503	0.00697143	0.0198815	0.939964	AT1G28960.1;AT1G28960.3;AT1G28960.5	7.88317	0.011026	0.0242468	0.883551	AT1G28960.1;AT1G28960.3;AT1G28960.5	12.1988	0.0269947	0.102993	0.724373	AT1G28960.1;AT1G28960.3;AT1G28960.5	6.95684	0.0668901	0.134044	0.478235	AT1G28960.1;AT1G28960.3;AT1G28960.5	2.65118	0.412239	0.76338	0.115041	AT1G28960.1;AT1G28960.3;AT1G28960.5	0.127424	0.115456	0.582221	0.345279	AT1G28960.1;AT1G28960.3;AT1G28960.5	1.69346	0.371051	0.8138	0.128751	AT1G28960.1;AT1G28960.3;AT1G28960.5	1.87111	0.235472	0.7799	0.200284	AT1G28960.1;AT1G28960.3;AT1G28960.5	1.20916	0.655764
plastid	AT2G23670.1	| homolog of Synechocystis YCF37 | Chr2:10063307-10063810 REVERSE LENGTH=167 | 201606	2	1	1.991	17078.3	AT2G23670.1	14.5588	1.49204e-06	0.000111508	1	AT2G23670.1	13.9429	2.56075e-06	9.3624e-05	1	AT2G23670.1	10.1399	0.00130173	0.0224251	0.999889	AT2G23670.1	6.11689	1.19679e-06	0.000214558	1	AT2G23670.1	3.18	0.00010336	0.0369024	1	AT2G23670.1	2.29616	0.000651534	0.0582119	0.999947	AT2G23670.1	1.25919	0.00726839	0.567165	0.935824	AT2G23670.1	1.04417	0.733338	0.928141	0.0606404	AT2G23670.1	1.4358	0.156326
plastid	AT5G54270.1	| light-harvesting chlorophyll B-binding protein 3 | Chr5:22038424-22039383 FORWARD LENGTH=265 | 201606	6	5	5.879	28707.4	AT5G54270.1	14.5478	2.59231e-05	0.000551219	1	AT5G54270.1	12.4279	4.08859e-05	0.000492375	1	AT5G54270.1	8.12994	0.00186139	0.0255665	0.999369	AT5G54270.1	4.92898	0.000294878	0.00334807	0.999999	AT5G54270.1	1.58188	0.32235	0.706777	0.148697	AT5G54270.1	1.4607	0.621499	0.906241	0.0722082	AT5G54270.1	1.42055	0.183427	0.763824	0.246232	AT5G54270.1	1.17057	0.082613	0.674897	0.416989	AT5G54270.1	1.78941	0.0164063
mitochondrion	AT2G23390.1	| acyl-CoA | Chr2:9960568-9963476 REVERSE LENGTH=469 | 201606	2	1	1.987	54311.3	AT2G23390.1	14.4206	0.000287757	0.00223264	1	AT2G23390.1	8.3177	0.000814253	0.00346279	0.999851	AT2G23390.1	5.94284	0.0315849	0.113248	0.683206	AT2G23390.1	2.96924	0.0156765	0.0469189	0.823752	AT2G23390.1	1.54724	0.605342	0.8552	0.0744074	AT2G23390.1	0.860187	0.805639	0.961277	0.055371	AT2G23390.1	0.667749	0.35906	0.81327	0.133243	AT2G23390.1	1.73373	0.00994363	0.447687	0.868729	AT2G23390.1	2.42656	0.0378703
plastid	AT1G32060.1	| phosphoribulokinase | Chr1:11532668-11534406 FORWARD LENGTH=395 | 201606	19	18	23.914	44465.3	AT1G32060.1	14.3698	4.38005e-06	0.000203569	1	AT1G32060.1	13.2714	2.8545e-06	9.80174e-05	1	AT1G32060.1	9.96261	0.000224129	0.0108951	1	AT1G32060.1	5.27996	2.68742e-05	0.000875291	1	AT1G32060.1	1.83108	0.0443944	0.383695	0.583327	AT1G32060.1	1.55825	0.0147161	0.250337	0.835515	AT1G32060.1	1.02909	0.760274	0.924897	0.0582986	AT1G32060.1	1.08276	0.180198	0.755267	0.249237	AT1G32060.1	1.44237	0.0239691
plastid	AT1G55670.1	| photosystem I subunit G | Chr1:20802874-20803356 REVERSE LENGTH=160 | 201606	3	3	2.937	17086.1	AT1G55670.1	13.965	0.798637	0.847146	0.0557775	AT1G55670.1	21.5931	0.00236399	0.00756537	0.993919	AT1G55670.1	47.7278	0.0157409	0.0755385	0.84815	AT1G55670.1	7.45501	0.0169231	0.049547	0.808952	AT1G55670.1	1.97405	0.273065	0.673976	0.174535	AT1G55670.1	0.814792	0.834623	0.965086	0.0538572	AT1G55670.1	1.32499	0.99643	0.998803	0.0500018	AT1G55670.1	0.646735	0.165124	0.743788	0.266312	AT1G55670.1	0.292597	0.196199
plastid	ATCG00720.1	| photosynthetic electron transfer B | ChrC:74841-76292 FORWARD LENGTH=215 | 201606	6	6	5.968	24152.8	ATCG00720.1	13.8046	1.00649e-06	9.38761e-05	1	ATCG00720.1	11.6631	2.00123e-06	7.95548e-05	1	ATCG00720.1	7.57845	0.000119701	0.00833316	1	ATCG00720.1	4.0905	6.86371e-05	0.00145339	1	ATCG00720.1	1.58228	0.098737	0.48458	0.381945	ATCG00720.1	1.23944	0.326769	0.759052	0.146687	ATCG00720.1	0.948303	0.682718	0.898331	0.0650544	ATCG00720.1	1.18362	0.0571872	0.636255	0.50424	ATCG00720.1	1.82156	0.00192696
plastid	AT4G25080.1;AT4G25080.2;AT4G25080.3;AT4G25080.4;AT4G25080.5;AT4G25080.6	| magnesium-protoporphyrin IX methyltransferase | Chr4:12877015-12878128 FORWARD LENGTH=312 | 201606 [AT4G25080.1,AT4G25080.2,AT4G25080.3,AT4G25080.4,AT4G25080.5,AT4G25080.6]	16	13	18.732	33796.3	AT4G25080.1;AT4G25080.2;AT4G25080.3;AT4G25080.4;AT4G25080.5;AT4G25080.6	13.737	3.28881e-07	5.39152e-05	1	AT4G25080.1;AT4G25080.2;AT4G25080.3;AT4G25080.4;AT4G25080.5;AT4G25080.6	12.4412	1.04997e-07	1.66748e-05	1	AT4G25080.1;AT4G25080.2;AT4G25080.3;AT4G25080.4;AT4G25080.5;AT4G25080.6	9.10643	3.47004e-05	0.00534386	1	AT4G25080.1;AT4G25080.2;AT4G25080.3;AT4G25080.4;AT4G25080.5;AT4G25080.6	6.853	4.23522e-06	0.000358724	1	AT4G25080.1;AT4G25080.2;AT4G25080.3;AT4G25080.4;AT4G25080.5;AT4G25080.6	2.5826	0.00306837	0.119453	0.988192	AT4G25080.1;AT4G25080.2;AT4G25080.3;AT4G25080.4;AT4G25080.5;AT4G25080.6	2.14703	0.000199464	0.0389876	1	AT4G25080.1;AT4G25080.2;AT4G25080.3;AT4G25080.4;AT4G25080.5;AT4G25080.6	1.58176	0.00192918	0.44641	0.996581	AT4G25080.1;AT4G25080.2;AT4G25080.3;AT4G25080.4;AT4G25080.5;AT4G25080.6	1.10416	0.0743416	0.660719	0.441721	AT4G25080.1;AT4G25080.2;AT4G25080.3;AT4G25080.4;AT4G25080.5;AT4G25080.6	1.5085	0.00540128
plastid	AT3G26650.1	| glyceraldehyde 3-phosphate dehydrogenase A subunit | Chr3:9795226-9796848 FORWARD LENGTH=396 | 201606	23	6	31.738	42490.1	AT3G26650.1	13.6527	1.39813e-07	3.63839e-05	1	AT3G26650.1	11.5517	5.73426e-08	1.21686e-05	1	AT3G26650.1	9.2686	3.61216e-05	0.00539911	1	AT3G26650.1	5.17717	5.33661e-06	0.000418341	1	AT3G26650.1	2.04677	0.00869396	0.209954	0.915827	AT3G26650.1	1.64091	9.48505e-05	0.02537	1	AT3G26650.1	1.26508	0.0199825	0.642303	0.774803	AT3G26650.1	1.18188	0.0194916	0.513143	0.750574	AT3G26650.1	1.47301	0.0108305
plastid	AT3G25820.1;AT3G25830.1;AT3G25820.2	| terpene synthase-like sequence-1%2C8-cineole | Chr3:9439282-9442053 FORWARD LENGTH=600 | 201606 [AT3G25820.1,AT3G25830.1]	4	4	4.938	70456.9	AT3G25820.1;AT3G25830.1;AT3G25820.2	13.5678	0.000613412	0.00361223	0.99996	AT3G25820.1;AT3G25830.1;AT3G25820.2	13.0581	0.000249034	0.00152297	1	AT3G25820.1;AT3G25830.1;AT3G25820.2	7.64854	0.0139769	0.0710307	0.870592	AT3G25820.1;AT3G25830.1;AT3G25820.2	3.3721	0.00855376	0.0306776	0.917794	AT3G25820.1;AT3G25830.1;AT3G25820.2	1.86235	0.473144	0.793446	0.0987151	AT3G25820.1;AT3G25830.1;AT3G25820.2	1.02755	0.77605	0.951501	0.0572004	AT3G25820.1;AT3G25830.1;AT3G25820.2	0.449062	0.063482	0.742917	0.491546	AT3G25820.1;AT3G25830.1;AT3G25820.2	1.03903	0.996369	0.998499	0.0500019	AT3G25820.1;AT3G25830.1;AT3G25820.2	1.77391	0.143719
plastid	AT5G06690.1	| WCRKC thioredoxin 1 | Chr5:2060651-2061956 REVERSE LENGTH=210 | 201606	3	3	2.971	24517.4	AT5G06690.1	13.4992	0.00749426	0.0209033	0.932664	AT5G06690.1	45.5563	0.0155711	0.0318455	0.825029	AT5G06690.1	5.06785	1.87567e-06	0.00251867	1	AT5G06690.1	2.83415	0.0172111	0.0500956	0.805607	AT5G06690.1	1.97196	0.341525	0.720973	0.140284	AT5G06690.1	1.1504	0.603301	0.897275	0.0746953	AT5G06690.1	1.05645	0.941798	0.982868	0.0504691	AT5G06690.1	0.296319	0.348783	0.803914	0.138449	AT5G06690.1	2.6637	0.272783
plastid	AT3G47470.1	| light-harvesting chlorophyll-protein complex I subunit A4 | Chr3:17493622-17494773 REVERSE LENGTH=251 | 201606	8	8	8.932	27734.4	AT3G47470.1	13.4151	0.00722357	0.0203381	0.93645	AT3G47470.1	11.2877	0.00907077	0.0208398	0.910549	AT3G47470.1	8.93178	0.0339764	0.1185	0.663569	AT3G47470.1	4.11653	0.0449515	0.100769	0.580132	AT3G47470.1	1.80393	0.212594	0.627789	0.218089	AT3G47470.1	1.6065	0.240954	0.71152	0.195629	AT3G47470.1	0.869586	0.802544	0.938672	0.0555487	AT3G47470.1	1.18847	0.0268337	0.549767	0.682215	AT3G47470.1	1.50195	0.00428357
plastid	AT1G68660.1;AT1G68660.2	| Ribosomal protein L12/ ATP-dependent Clp protease adaptor protein ClpS family protein | Chr1:25778058-25779083 REVERSE LENGTH=159 | 201606 [AT1G68660.1,AT1G68660.2]	3	2	3.853	17000.8	AT1G68660.1;AT1G68660.2	13.1862	0.00087943	0.0046164	0.999792	AT1G68660.1;AT1G68660.2	2.42963	0.0523129	0.0862044	0.541164	AT1G68660.1;AT1G68660.2	8.40015	0.743088	0.826932	0.0587904	AT1G68660.1;AT1G68660.2	5.55313	6.13314e-05	0.00137914	1	AT1G68660.1;AT1G68660.2	2.80759	0.00131073	0.0989693	0.999025	AT1G68660.1;AT1G68660.2	2.82668	0.00380614	0.130694	0.980719	AT1G68660.1;AT1G68660.2	1.74791	0.608032	0.877847	0.0740315	AT1G68660.1;AT1G68660.2	5.42724	0.00461181	0.378598	0.951997	AT1G68660.1;AT1G68660.2	1.56976	0.273306
golgi	AT3G05680.1;AT3G05680.2	| embryo defective 2016 | Chr3:1660802-1672015 REVERSE LENGTH=2138 | 201606 [AT3G05680.1,AT3G05680.2]	4	1	3.88	234228	AT3G05680.1;AT3G05680.2	13.1765	0.0834865	0.136864	0.422691	AT3G05680.1;AT3G05680.2	13.9842	0.00380107	0.0107257	0.980775	AT3G05680.1;AT3G05680.2	26.3873	0.0655196	0.171582	0.482377	AT3G05680.1;AT3G05680.2	0.379581	0.384735	0.504754	0.123915	AT3G05680.1;AT3G05680.2	1.4397	0.681122	0.88598	0.065219	AT3G05680.1;AT3G05680.2	0.551886	0.673362	0.923624	0.0660352	AT3G05680.1;AT3G05680.2	1.13982	0.443166	0.835256	0.106236	AT3G05680.1;AT3G05680.2	0.942243	0.490191	0.845725	0.0957084	AT3G05680.1;AT3G05680.2	0.499349	0.722475
extracellular	AT4G28250.1;AT4G28250.2	| expansin B3 | Chr4:14000446-14001945 REVERSE LENGTH=264 | 201606 [AT4G28250.1,AT4G28250.2]	2	2	1.979	28425.2	AT4G28250.1;AT4G28250.2	13.1158	0.0074919	0.0209033	0.932697	AT4G28250.1;AT4G28250.2	8.85733	0.00720178	0.0174113	0.936754	AT4G28250.1;AT4G28250.2	8.89072	0.0260973	0.100857	0.733003	AT4G28250.1;AT4G28250.2	5.77102	0.0145363	0.0441843	0.837752	AT4G28250.1;AT4G28250.2	3.49878	0.0552242	0.417198	0.527242	AT4G28250.1;AT4G28250.2	4.07793	0.0262511	0.340845	0.713521	AT4G28250.1;AT4G28250.2	2.2387	0.121149	0.747071	0.33429	AT4G28250.1;AT4G28250.2	1.48078	0.358007	0.803914	0.134798	AT4G28250.1;AT4G28250.2	1.47522	0.423828
plastid	AT2G47840.1	| Uncharacterized conserved protein ycf60 | Chr2:19594331-19594957 REVERSE LENGTH=208 | 201606	2	1	1.936	22912.8	AT2G47840.1	13.0744	0.0579328	0.101017	0.514949	AT2G47840.1	72.5466	0.000197178	0.00131676	1	AT2G47840.1	11.2691	0.479799	0.611418	0.0935552	AT2G47840.1	4.21122	0.0818092	0.156064	0.427705	AT2G47840.1	4.75716	0.236083	0.645632	0.1992	AT2G47840.1	2.92266	0.542774	0.879584	0.0843625	AT2G47840.1	4.46082	0.00104557	0.44641	0.99958	AT2G47840.1	0.180221	0.0316961	0.560329	0.644405	AT2G47840.1	1.1602	0.465504
cytosol	AT1G42550.1	| plastid movement impaired1 | Chr1:15977131-15979734 FORWARD LENGTH=843 | 201606	15	14	14.839	93875.4	AT1G42550.1	12.9802	0.000290993	0.00224405	0.999999	AT1G42550.1	12.6755	0.000158464	0.00113906	1	AT1G42550.1	10.8131	0.00086063	0.019183	0.999991	AT1G42550.1	5.48685	1.22436e-06	0.000214558	1	AT1G42550.1	2.41283	0.00709646	0.194942	0.938224	AT1G42550.1	2.23942	0.000820336	0.0662312	0.999846	AT1G42550.1	1.62852	0.0444315	0.742917	0.583114	AT1G42550.1	1.02404	0.986668	0.997232	0.0500252	AT1G42550.1	1.20042	0.648464
plastid	AT5G47190.1	| Ribosomal protein L19 family protein | Chr5:19164432-19166064 REVERSE LENGTH=229 | 201606	7	5	8.857	25469.2	AT5G47190.1	12.9796	1.7383e-05	0.000423955	1	AT5G47190.1	12.5549	2.64319e-05	0.000371754	1	AT5G47190.1	10.2955	0.00116411	0.0218072	0.99994	AT5G47190.1	5.66596	0.00012543	0.00208969	1	AT5G47190.1	2.27316	0.062365	0.428428	0.496077	AT5G47190.1	2.02037	0.024671	0.333368	0.727965	AT5G47190.1	1.70935	0.0173395	0.642303	0.804125	AT5G47190.1	1.03383	0.593038	0.884422	0.0767684	AT5G47190.1	1.26071	0.186257
plastid	ATCG00790.1	| ribosomal protein L16 | ChrC:81189-82652 REVERSE LENGTH=135 | 201606	5	4	5.982	15294.6	ATCG00790.1	12.9702	1.07884e-06	9.45286e-05	1	ATCG00790.1	12.1447	2.89182e-08	7.73485e-06	1	ATCG00790.1	10.4222	7.71409e-05	0.00710322	1	ATCG00790.1	6.95861	1.56289e-05	0.00063541	1	ATCG00790.1	2.55116	0.0412757	0.377749	0.601943	ATCG00790.1	2.19669	2.33623e-05	0.0104088	1	ATCG00790.1	1.87377	2.47074e-05	0.0313907	1	ATCG00790.1	1.06797	0.507443	0.848969	0.0919849	ATCG00790.1	1.24448	0.17938
plastid	AT5G51720.1	| 2 iron%2C 2 sulfur cluster binding protein | Chr5:21009645-21010227 FORWARD LENGTH=108 | 201606	2	2	1.994	11626.2	AT5G51720.1	12.8956	4.40625e-06	0.000203569	1	AT5G51720.1	12.3388	1.41396e-06	6.47365e-05	1	AT5G51720.1	10.9382	0.00251073	0.0293322	0.997873	AT5G51720.1	6.45006	7.00112e-06	0.000491515	1	AT5G51720.1	2.28861	0.00117926	0.0946254	0.999335	AT5G51720.1	1.51656	0.010041	0.209132	0.897053	AT5G51720.1	1.09151	0.419721	0.824938	0.112804	AT5G51720.1	1.04513	0.644802	0.899768	0.0697296	AT5G51720.1	1.17895	0.411845
plastid	AT5G13650.1;AT5G13650.2	| elongation factor family protein | Chr5:4397821-4402364 FORWARD LENGTH=675 | 201606 [AT5G13650.1,AT5G13650.2]	11	7	11.929	74316.1	AT5G13650.1;AT5G13650.2	12.8841	2.08866e-05	0.00048242	1	AT5G13650.1;AT5G13650.2	12.3042	3.19421e-06	0.000102689	1	AT5G13650.1;AT5G13650.2	12.5035	7.47899e-05	0.00710322	1	AT5G13650.1;AT5G13650.2	7.84159	4.02491e-05	0.0011055	1	AT5G13650.1;AT5G13650.2	2.98156	0.00576699	0.172444	0.956448	AT5G13650.1;AT5G13650.2	1.66431	0.198063	0.673972	0.23137	AT5G13650.1;AT5G13650.2	1.39644	0.0586062	0.742917	0.511985	AT5G13650.1;AT5G13650.2	1.04713	0.817972	0.955353	0.0548156	AT5G13650.1;AT5G13650.2	1.03044	0.898956
plastid	AT5G14740.2;AT5G14740.6;AT5G14740.7;AT5G14740.8;AT5G14740.9;AT5G14740.5	| carbonic anhydrase 2 | Chr5:4760536-4762382 FORWARD LENGTH=259 | 201606 [AT5G14740.2,AT5G14740.6,AT5G14740.7,AT5G14740.8,AT5G14740.9]	22	12	26.708	28344.7	AT5G14740.2;AT5G14740.6;AT5G14740.7;AT5G14740.8;AT5G14740.9;AT5G14740.5	12.7585	7.75406e-08	2.89933e-05	1	AT5G14740.2;AT5G14740.6;AT5G14740.7;AT5G14740.8;AT5G14740.9;AT5G14740.5	11.2367	5.81107e-08	1.21686e-05	1	AT5G14740.2;AT5G14740.6;AT5G14740.7;AT5G14740.8;AT5G14740.9;AT5G14740.5	9.14133	0.00123048	0.0218728	0.999918	AT5G14740.2;AT5G14740.6;AT5G14740.7;AT5G14740.8;AT5G14740.9;AT5G14740.5	6.21497	5.36763e-07	0.000191772	1	AT5G14740.2;AT5G14740.6;AT5G14740.7;AT5G14740.8;AT5G14740.9;AT5G14740.5	2.05042	0.00277463	0.115276	0.990772	AT5G14740.2;AT5G14740.6;AT5G14740.7;AT5G14740.8;AT5G14740.9;AT5G14740.5	1.7944	0.00122083	0.0791928	0.999245	AT5G14740.2;AT5G14740.6;AT5G14740.7;AT5G14740.8;AT5G14740.9;AT5G14740.5	1.29674	0.00258631	0.44641	0.992286	AT5G14740.2;AT5G14740.6;AT5G14740.7;AT5G14740.8;AT5G14740.9;AT5G14740.5	1.13544	0.0158914	0.494837	0.790531	AT5G14740.2;AT5G14740.6;AT5G14740.7;AT5G14740.8;AT5G14740.9;AT5G14740.5	1.39569	0.133175
plastid	AT5G46390.2	| Peptidase S41 family protein | Chr5:18816612-18819148 FORWARD LENGTH=489 | 201606	8	7	7.906	53034.4	AT5G46390.2	12.636	3.15154e-05	0.000604382	1	AT5G46390.2	13.3746	9.72829e-05	0.000856831	1	AT5G46390.2	13.1021	9.28105e-06	0.00251867	1	AT5G46390.2	6.96567	1.8072e-05	0.000701085	1	AT5G46390.2	3.05636	0.0373998	0.361776	0.626954	AT5G46390.2	1.99018	0.0961546	0.543	0.388291	AT5G46390.2	1.0757	0.993123	0.998742	0.0500065	AT5G46390.2	0.944769	0.88161	0.972106	0.0520081	AT5G46390.2	0.964419	0.724983
extracellular	AT2G33530.1	| serine carboxypeptidase-like 46 | Chr2:14197866-14200536 REVERSE LENGTH=465 | 201606	3	2	2.915	51883.7	AT2G33530.1	12.4307	0.0342999	0.0664818	0.648651	AT2G33530.1	5.80284	0.0452576	0.0764371	0.578392	AT2G33530.1	3.2594	0.306997	0.455388	0.14919	AT2G33530.1	1.7191	0.153326	0.253399	0.282743	AT2G33530.1	1.82347	0.815125	0.939474	0.0548459	AT2G33530.1	1.96955	0.400443	0.801295	0.118716	AT2G33530.1	1.7989	0.760387	0.924897	0.0582904	AT2G33530.1	2.14217	0.460259	0.835913	0.102798	AT2G33530.1	3.8138	0.212349
nucleus	AT4G32160.1	| Phox (PX) domain-containing protein | Chr4:15529056-15532892 FORWARD LENGTH=723 | 201606	4	4	3.86	81813.4	AT4G32160.1	12.3552	6.03695e-05	0.000882805	1	AT4G32160.1	11.7	7.0712e-05	0.000672956	1	AT4G32160.1	10.1833	0.00100759	0.0207312	0.999974	AT4G32160.1	4.9549	0.000560012	0.00508211	0.999975	AT4G32160.1	1.67772	0.0998387	0.485531	0.3793	AT4G32160.1	1.3945	0.139904	0.624165	0.302332	AT4G32160.1	1.03987	0.728605	0.912581	0.0607746	AT4G32160.1	1.05599	0.253827	0.781634	0.187508	AT4G32160.1	1.21328	0.112491
plastid	AT1G44575.1;AT1G44575.3	| Chlorophyll A-B binding family protein | Chr1:16871768-16873194 FORWARD LENGTH=265 | 201606 [AT1G44575.1,AT1G44575.3]	7	7	7.944	28009.7	AT1G44575.1;AT1G44575.3	12.3422	2.9478e-09	1.49807e-05	1	AT1G44575.1;AT1G44575.3	11.4791	4.3459e-09	3.96125e-06	1	AT1G44575.1;AT1G44575.3	9.83868	2.07612e-06	0.00251867	1	AT1G44575.1;AT1G44575.3	5.3566	3.66955e-06	0.000333011	1	AT1G44575.1;AT1G44575.3	2.11046	0.0155708	0.262022	0.825032	AT1G44575.1;AT1G44575.3	1.74973	3.83004e-06	0.00494932	1	AT1G44575.1;AT1G44575.3	1.26719	0.0106921	0.593805	0.888102	AT1G44575.1;AT1G44575.3	1.07519	0.0552798	0.632717	0.512384	AT1G44575.1;AT1G44575.3	1.25446	0.00662706
plastid	AT5G18660.1	| NAD(P)-binding Rossmann-fold superfamily protein | Chr5:6220872-6222125 REVERSE LENGTH=417 | 201606	6	6	5.976	45894.7	AT5G18660.1	12.3165	9.64744e-05	0.00115633	1	AT5G18660.1	9.98386	0.000134187	0.00103072	1	AT5G18660.1	8.82386	0.00116388	0.0218072	0.99994	AT5G18660.1	5.49044	0.000571473	0.00513114	0.999972	AT5G18660.1	2.56781	0.0093136	0.214556	0.907157	AT5G18660.1	1.94782	0.0393005	0.403485	0.614413	AT5G18660.1	2.11846	0.0242569	0.676948	0.731857	AT5G18660.1	1.23364	0.0147636	0.487102	0.804112	AT5G18660.1	1.39582	0.00772987
plastid	AT2G05310.1	| transmembrane protein | Chr2:1933391-1934145 REVERSE LENGTH=125 | 201606	2	2	1.99	13808.8	AT2G05310.1	12.2543	0.00858638	0.0231613	0.917336	AT2G05310.1	15.5897	0.00016626	0.00117679	1	AT2G05310.1	7.17424	0.00650271	0.0472697	0.966441	AT2G05310.1	5.07	0.00179797	0.0108005	0.997235	AT2G05310.1	3.12137	0.00829715	0.208492	0.921396	AT2G05310.1	3.14722	0.111341	0.570975	0.353659	AT2G05310.1	1.93695	0.172982	0.763824	0.257901	AT2G05310.1	0.786053	0.349148	0.803914	0.138302	AT2G05310.1	1.7081	0.509555
plastid	AT5G08650.1;AT5G08650.2	| Small GTP-binding protein | Chr5:2806533-2813220 REVERSE LENGTH=681 | 201606 [AT5G08650.1,AT5G08650.2]	4	4	3.95	75440	AT5G08650.1;AT5G08650.2	12.1555	0.00315715	0.0111674	0.987364	AT5G08650.1;AT5G08650.2	9.19836	0.00311324	0.00921998	0.987776	AT5G08650.1;AT5G08650.2	16.5305	0.00733891	0.0500259	0.95667	AT5G08650.1;AT5G08650.2	6.24232	0.00589128	0.0236676	0.95478	AT5G08650.1;AT5G08650.2	1.84301	0.28064	0.681746	0.170105	AT5G08650.1;AT5G08650.2	1.46756	0.315357	0.752414	0.15197	AT5G08650.1;AT5G08650.2	1.20737	0.549079	0.860236	0.083246	AT5G08650.1;AT5G08650.2	1.32148	0.390311	0.804409	0.123143	AT5G08650.1;AT5G08650.2	0.735337	0.414723
plastid	AT4G03280.2	| photosynthetic electron transfer C | Chr4:1440462-1441717 FORWARD LENGTH=210 | 201606	5	5	6.977	22533.1	AT4G03280.2	12.1285	4.09358e-06	0.000193368	1	AT4G03280.2	11.9553	7.19593e-07	4.30232e-05	1	AT4G03280.2	8.35955	0.00361131	0.035086	0.99272	AT4G03280.2	5.52958	3.82898e-06	0.000334503	1	AT4G03280.2	2.153	0.00211682	0.110993	0.995523	AT4G03280.2	1.64326	0.00322355	0.121667	0.98673	AT4G03280.2	1.06484	0.623317	0.881876	0.0719694	AT4G03280.2	1.01449	0.930418	0.986119	0.050689	AT4G03280.2	1.45086	0.166587
plastid	AT3G01510.1	| like SEX4 1 | Chr3:198855-201682 REVERSE LENGTH=591 | 201606	2	2	1.912	65743.2	AT3G01510.1	11.987	0.000369494	0.00261164	0.999998	AT3G01510.1	8.18021	0.000716653	0.00318081	0.999916	AT3G01510.1	5.97913	0.00636957	0.0465757	0.967934	AT3G01510.1	1.8425	0.0817172	0.156064	0.427983	AT3G01510.1	0.73189	0.478494	0.796759	0.0974664	AT3G01510.1	0.410796	0.0996138	0.547898	0.379837	AT3G01510.1	0.383321	0.149439	0.760209	0.288172	AT3G01510.1	1.46536	0.0013282	0.269944	0.996025	AT3G01510.1	2.0048	0.000612048
cytosol	AT5G42250.1	| Zinc-binding alcohol dehydrogenase family protein | Chr5:16894087-16897450 FORWARD LENGTH=390 | 201606	4	4	3.961	42567.7	AT5G42250.1	11.7399	7.84411e-05	0.00103542	1	AT5G42250.1	2.57153	0.137077	0.193292	0.306778	AT5G42250.1	2.68667	0.115822	0.24382	0.336564	AT5G42250.1	1.05262	0.876027	0.913224	0.0521477	AT5G42250.1	1.48717	0.668442	0.882311	0.0665665	AT5G42250.1	1.07488	0.881895	0.979841	0.0519471	AT5G42250.1	1.21666	0.555206	0.861558	0.082187	AT5G42250.1	4.56535	0.00582973	0.383706	0.932388	AT5G42250.1	4.36969	0.00948483
plastid	AT4G38970.1	| fructose-bisphosphate aldolase 2 | Chr4:18163714-18165659 REVERSE LENGTH=398 | 201606	28	12	35.839	42988.1	AT4G38970.1	11.6546	3.98765e-07	6.01427e-05	1	AT4G38970.1	10.8398	4.67145e-07	3.54333e-05	1	AT4G38970.1	8.15559	0.000361314	0.0131157	1	AT4G38970.1	5.02718	1.49152e-05	0.000630061	1	AT4G38970.1	1.82184	0.0112288	0.2282	0.880803	AT4G38970.1	1.59035	0.00284901	0.119577	0.990143	AT4G38970.1	1.14808	0.113077	0.742917	0.350078	AT4G38970.1	1.07517	0.0450317	0.605067	0.561602	AT4G38970.1	1.42903	0.0425881
plastid	ATCG01090.1	| NADPH dehydrogenase | ChrC:119244-119762 REVERSE LENGTH=172 | 201606	3	3	2.978	20086.9	ATCG01090.1	11.6267	8.69161e-07	8.87981e-05	1	ATCG01090.1	10.6473	3.10073e-06	0.000101312	1	ATCG01090.1	6.38662	0.00132648	0.0225458	0.999877	ATCG01090.1	2.64829	0.000264809	0.00314993	1	ATCG01090.1	1.24062	0.565789	0.836069	0.0804162	ATCG01090.1	0.833915	0.2471	0.712429	0.191273	ATCG01090.1	0.890247	0.507777	0.846628	0.0910845	ATCG01090.1	1.09198	0.234353	0.7799	0.201109	ATCG01090.1	1.82047	0.015943
plastid	AT5G37360.1	| LOW protein: ammonium transporter 1-like protein | Chr5:14805437-14808113 REVERSE LENGTH=309 | 201606	3	2	2.935	33441.3	AT5G37360.1	11.3783	0.0068926	0.019712	0.94106	AT5G37360.1	8.88398	0.0102753	0.0229434	0.89382	AT5G37360.1	6.27184	0.0456928	0.139886	0.581937	AT5G37360.1	3.37473	0.0553322	0.117411	0.52674	AT5G37360.1	2.88627	0.112274	0.512649	0.351724	AT5G37360.1	1.34244	0.574966	0.891442	0.0789384	AT5G37360.1	1.47384	0.517995	0.84985	0.0890257	AT5G37360.1	1.28077	0.0167304	0.494837	0.780773	AT5G37360.1	1.81419	0.00366934
plastid	AT3G55800.1	| sedoheptulose-bisphosphatase | Chr3:20709640-20711421 FORWARD LENGTH=393 | 201606	21	19	24.781	42415.6	AT3G55800.1	11.3094	2.40249e-06	0.000147102	1	AT3G55800.1	10.0287	4.33625e-07	3.49791e-05	1	AT3G55800.1	9.58133	8.3419e-05	0.00710322	1	AT3G55800.1	5.22622	2.49348e-06	0.000275476	1	AT3G55800.1	1.91938	0.0110143	0.22753	0.88371	AT3G55800.1	1.59403	0.00565634	0.156226	0.957924	AT3G55800.1	1.12428	0.337065	0.806284	0.142171	AT3G55800.1	1.12771	0.141525	0.727088	0.297654	AT3G55800.1	1.18036	0.218514
plastid	AT2G35260.1	| CAAX protease self-immunity protein | Chr2:14849642-14851601 FORWARD LENGTH=382 | 201606	2	1	1.945	41712.1	AT2G35260.1	11.0347	0.129331	0.194455	0.319607	AT2G35260.1	5.91418	0.628225	0.692997	0.0713333	AT2G35260.1	0.184616	0.447897	0.584565	0.100864	AT2G35260.1	0.0172197	0.181774	0.2885	0.248016	AT2G35260.1	0.782382	0.730853	0.907673	0.0605864	AT2G35260.1	0.404185	0.59341	0.894785	0.0761235	AT2G35260.1	1.05261	0.879272	0.963554	0.0520355	AT2G35260.1	1.86581	0.369185	0.803914	0.130574	AT2G35260.1	59.7712	0.0182771
plastid	AT1G42970.1	| glyceraldehyde-3-phosphate dehydrogenase B subunit | Chr1:16127552-16129584 FORWARD LENGTH=447 | 201606	24	18	34.702	47659.3	AT1G42970.1	10.9144	2.5463e-07	4.51577e-05	1	AT1G42970.1	9.54396	3.95276e-08	1.0044e-05	1	AT1G42970.1	7.41392	0.000180071	0.00993645	1	AT1G42970.1	4.24297	7.52686e-06	0.000491515	1	AT1G42970.1	1.74853	0.0131011	0.240956	0.855999	AT1G42970.1	1.37784	0.00155088	0.0885573	0.99827	AT1G42970.1	1.08121	0.434289	0.833807	0.108647	AT1G42970.1	1.14359	0.0333521	0.564761	0.632613	AT1G42970.1	1.47215	0.0265677
plastid	ATCG00380.1	| chloroplast ribosomal protein S4 | ChrC:45223-45828 REVERSE LENGTH=201 | 201606	5	5	4.93	23241.2	ATCG00380.1	10.9006	4.58729e-05	0.000749602	1	ATCG00380.1	8.87794	2.74645e-05	0.000380312	1	ATCG00380.1	7.62841	0.00355006	0.034964	0.993092	ATCG00380.1	4.95237	0.000506345	0.00474768	0.999985	ATCG00380.1	2.35598	0.0680546	0.444219	0.473856	ATCG00380.1	1.88111	0.0283874	0.352909	0.694955	ATCG00380.1	1.71681	0.0120662	0.594609	0.869576	ATCG00380.1	1.22783	0.108271	0.707886	0.355344	ATCG00380.1	1.42894	0.162129
cytosol	AT2G29490.1	| glutathione S-transferase TAU 1 | Chr2:12631593-12632360 REVERSE LENGTH=224 | 201606	7	7	7.922	25916	AT2G29490.1	10.784	0.220234	0.301597	0.211622	AT2G29490.1	10.2609	0.199004	0.264264	0.230468	AT2G29490.1	10.5368	0.00536882	0.0426318	0.97845	AT2G29490.1	5.21233	0.00325247	0.0159239	0.986451	AT2G29490.1	1.86532	0.14562	0.562655	0.293695	AT2G29490.1	1.79141	0.082313	0.512961	0.426186	AT2G29490.1	1.21885	0.390595	0.81822	0.121933	AT2G29490.1	1.05099	0.986776	0.997232	0.0500248	AT2G29490.1	1.02346	0.602118
plastid	AT3G54050.1;AT3G54050.2	| high cyclic electron flow 1 | Chr3:20016951-20018527 FORWARD LENGTH=417 | 201606 [AT3G54050.1,AT3G54050.2]	9	8	10.876	45162.8	AT3G54050.1;AT3G54050.2	10.7731	4.14206e-07	6.01427e-05	1	AT3G54050.1;AT3G54050.2	9.88181	2.60833e-08	7.44606e-06	1	AT3G54050.1;AT3G54050.2	7.59079	0.00214414	0.0270878	0.998851	AT3G54050.1;AT3G54050.2	4.33533	2.61744e-06	0.000277122	1	AT3G54050.1;AT3G54050.2	1.51583	0.0131335	0.240956	0.855579	AT3G54050.1;AT3G54050.2	1.34527	0.00901865	0.197555	0.911278	AT3G54050.1;AT3G54050.2	1.00878	0.854237	0.956684	0.0529824	AT3G54050.1;AT3G54050.2	1.09019	0.160748	0.740579	0.271662	AT3G54050.1;AT3G54050.2	1.41923	0.140858
plastid	AT3G12780.1	| phosphoglycerate kinase 1 | Chr3:4061127-4063140 REVERSE LENGTH=481 | 201606	31	19	40.649	50113.1	AT3G12780.1	10.7456	1.48115e-06	0.000111508	1	AT3G12780.1	9.66605	5.4843e-07	3.76638e-05	1	AT3G12780.1	6.75302	0.00273246	0.0302535	0.997103	AT3G12780.1	3.89758	9.72698e-06	0.000531532	1	AT3G12780.1	1.54415	0.0321787	0.341403	0.66447	AT3G12780.1	1.38746	0.00328289	0.121667	0.986155	AT3G12780.1	0.953495	0.689665	0.898921	0.0643507	AT3G12780.1	1.11168	0.145782	0.730531	0.291517	AT3G12780.1	1.59123	0.0753992
plastid	AT2G30950.1;AT2G30950.2;AT2G30950.3;AT2G30950.4	| FtsH extracellular protease family | Chr2:13174692-13177064 FORWARD LENGTH=695 | 201606 [AT2G30950.1,AT2G30950.2,AT2G30950.3,AT2G30950.4]	35	15	36.678	74158.9	AT2G30950.1;AT2G30950.2;AT2G30950.3;AT2G30950.4	10.6854	1.2967e-06	0.000107012	1	AT2G30950.1;AT2G30950.2;AT2G30950.3;AT2G30950.4	8.96434	4.37222e-09	3.96125e-06	1	AT2G30950.1;AT2G30950.2;AT2G30950.3;AT2G30950.4	8.47807	8.84094e-05	0.00710322	1	AT2G30950.1;AT2G30950.2;AT2G30950.3;AT2G30950.4	5.35955	2.13895e-07	0.000133542	1	AT2G30950.1;AT2G30950.2;AT2G30950.3;AT2G30950.4	2.35409	0.00110592	0.0946254	0.999478	AT2G30950.1;AT2G30950.2;AT2G30950.3;AT2G30950.4	2.46686	5.98771e-05	0.0195379	1	AT2G30950.1;AT2G30950.2;AT2G30950.3;AT2G30950.4	1.61001	0.00429096	0.499795	0.975194	AT2G30950.1;AT2G30950.2;AT2G30950.3;AT2G30950.4	1.19199	0.0657212	0.645464	0.470956	AT2G30950.1;AT2G30950.2;AT2G30950.3;AT2G30950.4	1.26036	0.14416
plastid	AT1G79790.2	| Haloacid dehalogenase-like hydrolase (HAD) superfamily protein | Chr1:30016987-30018186 REVERSE LENGTH=270 | 201606	2	2	1.985	30620.1	AT1G79790.2	10.6585	0.000654612	0.00376328	0.999945	AT1G79790.2	10.3493	0.000244228	0.00150444	1	AT1G79790.2	7.41459	0.00374975	0.0358281	0.991844	AT1G79790.2	3.49228	0.0118706	0.0382296	0.87218	AT1G79790.2	1.34233	0.50741	0.812284	0.0911599	AT1G79790.2	1.10089	0.863147	0.972403	0.0526239	AT1G79790.2	0.916928	0.659059	0.892068	0.0676101	AT1G79790.2	1.02987	0.994377	0.998274	0.0500045	AT1G79790.2	1.4375	0.251776
plastid	AT3G06510.1;AT3G06510.2	| Glycosyl hydrolase superfamily protein | Chr3:2016450-2019533 FORWARD LENGTH=622 | 201606 [AT3G06510.1,AT3G06510.2]	2	1	1.909	70780.5	AT3G06510.1;AT3G06510.2	10.6367	0.135877	0.202559	0.308703	AT3G06510.1;AT3G06510.2	4.85767	0.179628	0.24259	0.250367	AT3G06510.1;AT3G06510.2	14.0322	0.778631	0.85255	0.0564353	AT3G06510.1;AT3G06510.2	1.86629	0.80937	0.867951	0.055161	AT3G06510.1;AT3G06510.2	0.718875	0.913082	0.974105	0.0510494	AT3G06510.1;AT3G06510.2	0.32856	0.362166	0.777578	0.132056	AT3G06510.1;AT3G06510.2	1.11736	0.869292	0.960587	0.0523905	AT3G06510.1;AT3G06510.2	2.18968	0.40802	0.815817	0.117418	AT3G06510.1;AT3G06510.2	0.758024	0.366189
plasma membrane	AT1G52200.1	| PLAC8 family protein | Chr1:19442271-19443407 REVERSE LENGTH=190 | 201606	2	2	1.994	21178.7	AT1G52200.1	10.5419	0.121994	0.185399	0.332715	AT1G52200.1	9.49723	0.12763	0.182144	0.322559	AT1G52200.1	5.26606	0.284041	0.431336	0.160836	AT1G52200.1	2.6691	0.226607	0.340077	0.206473	AT1G52200.1	1.2711	0.825003	0.943116	0.05433	AT1G52200.1	2.36152	0.27047	0.726112	0.176097	AT1G52200.1	1.09264	0.85668	0.956684	0.0528817	AT1G52200.1	1.11	0.850267	0.962218	0.0532323	AT1G52200.1	2.00186	0.309437
plastid	AT2G43180.1;AT2G43180.3	| Phosphoenolpyruvate carboxylase family protein | Chr2:17953719-17955774 REVERSE LENGTH=479 | 201606 [AT2G43180.1,AT2G43180.3]	3	2	2.99	51987.5	AT2G43180.1;AT2G43180.3	10.5341	0.0652342	0.111661	0.484608	AT2G43180.1;AT2G43180.3	0.93568	0.650744	0.713348	0.068569	AT2G43180.1;AT2G43180.3	4.61203	0.251165	0.396404	0.180452	AT2G43180.1;AT2G43180.3	1.51204	0.316357	0.436763	0.151495	AT2G43180.1;AT2G43180.3	2.249	0.177062	0.599818	0.253229	AT2G43180.1;AT2G43180.3	0.836133	0.530487	0.873287	0.0866184	AT2G43180.1;AT2G43180.3	2.54167	0.721358	0.911243	0.0613943	AT2G43180.1;AT2G43180.3	11.2582	0.0285243	0.559862	0.668489	AT2G43180.1;AT2G43180.3	2.28405	0.389704
plastid	AT5G23120.1;AT5G23120.2	| photosystem II stability/assembly factor%2C chloroplast (HCF136) | Chr5:7778154-7780463 FORWARD LENGTH=403 | 201606 [AT5G23120.1,AT5G23120.2]	13	12	12.935	44105	AT5G23120.1;AT5G23120.2	10.4419	2.24843e-06	0.000142908	1	AT5G23120.1;AT5G23120.2	10.2379	2.16804e-06	8.2842e-05	1	AT5G23120.1;AT5G23120.2	7.67271	0.000811255	0.0185712	0.999994	AT5G23120.1;AT5G23120.2	4.5312	2.14241e-05	0.00076138	1	AT5G23120.1;AT5G23120.2	1.60964	0.0488026	0.395203	0.559027	AT5G23120.1;AT5G23120.2	1.36166	0.028906	0.353449	0.690605	AT5G23120.1;AT5G23120.2	0.860713	0.260316	0.78813	0.182436	AT5G23120.1;AT5G23120.2	1.01993	0.38453	0.804409	0.125108	AT5G23120.1;AT5G23120.2	1.36092	0.0869645
nucleus,cytosol	AT1G52410.1;AT1G52410.2	| TSK-associating protein 1 | Chr1:19520762-19525361 FORWARD LENGTH=755 | 201606 [AT1G52410.1,AT1G52410.2]	4	4	3.976	84020.7	AT1G52410.1;AT1G52410.2	10.4397	0.00107065	0.00532911	0.999539	AT1G52410.1;AT1G52410.2	3.80252	0.0113218	0.0247899	0.879546	AT1G52410.1;AT1G52410.2	0.534608	0.38902	0.531594	0.117284	AT1G52410.1;AT1G52410.2	0.177774	0.00980281	0.0335307	0.900351	AT1G52410.1;AT1G52410.2	0.599759	0.436523	0.781284	0.108032	AT1G52410.1;AT1G52410.2	0.659156	0.501665	0.855237	0.092356	AT1G52410.1;AT1G52410.2	0.743338	0.3996	0.819023	0.118986	AT1G52410.1;AT1G52410.2	2.74547	0.000141722	0.120015	1	AT1G52410.1;AT1G52410.2	19.5278	9.44947e-05
plastid	AT3G47070.1	| thylakoid soluble phosphoprotein | Chr3:17337205-17337507 REVERSE LENGTH=100 | 201606	6	6	6.966	10530.3	AT3G47070.1	10.4199	3.80341e-06	0.000191088	1	AT3G47070.1	8.66164	2.87108e-07	2.86095e-05	1	AT3G47070.1	7.90338	0.000195994	0.0102685	1	AT3G47070.1	3.9127	2.29063e-07	0.000133542	1	AT3G47070.1	1.56013	0.00329773	0.12251	0.986009	AT3G47070.1	1.12377	0.773165	0.951155	0.0573948	AT3G47070.1	0.911866	0.105726	0.742917	0.365744	AT3G47070.1	1.203	0.136553	0.727088	0.30513	AT3G47070.1	1.31841	0.145691
plastid	AT1G62750.1	| Translation elongation factor EFG/EF2 protein | Chr1:23233622-23236321 REVERSE LENGTH=783 | 201606	25	24	27.773	86059	AT1G62750.1	10.2021	1.75916e-05	0.000425717	1	AT1G62750.1	9.47989	1.7496e-06	7.22883e-05	1	AT1G62750.1	7.9893	0.00245462	0.0291457	0.998046	AT1G62750.1	5.84081	9.46529e-06	0.000531532	1	AT1G62750.1	2.3805	0.00172765	0.105989	0.997556	AT1G62750.1	1.83505	0.000558004	0.0567155	0.999975	AT1G62750.1	1.25439	0.169462	0.763824	0.262056	AT1G62750.1	1.07618	0.610991	0.89208	0.0741645	AT1G62750.1	1.27697	0.309227
plastid	AT3G58990.1	| isopropylmalate isomerase 1 | Chr3:21797524-21798285 REVERSE LENGTH=253 | 201606	2	1	1.977	27209	AT3G58990.1	10.1919	0.0874239	0.141628	0.411369	AT3G58990.1	0.252234	0.225803	0.293937	0.207111	AT3G58990.1	0.0648618	0.0930007	0.211184	0.390243	AT3G58990.1	0.0849575	0.0504673	0.109418	0.550402	AT3G58990.1	0.185851	0.103799	0.496093	0.370076	AT3G58990.1	0.946506	0.863061	0.972403	0.0526272	AT3G58990.1	0.589334	0.470132	0.839276	0.0994302	AT3G58990.1	40.4064	0.0322471	0.560798	0.640424	AT3G58990.1	157.132	0.00718801
plastid	AT4G01150.1	| CURVATURE THYLAKOID 1A-like protein | Chr4:493692-494668 FORWARD LENGTH=164 | 201606	3	3	4.956	17698.1	AT4G01150.1	10.1739	9.52694e-07	9.38761e-05	1	AT4G01150.1	8.85954	1.26821e-06	6.08024e-05	1	AT4G01150.1	6.20793	0.00561055	0.0437985	0.976037	AT4G01150.1	3.73238	4.7972e-05	0.00122697	1	AT4G01150.1	1.62112	0.0537298	0.411848	0.534292	AT4G01150.1	1.46649	0.00533722	0.152423	0.96213	AT4G01150.1	1.11648	0.247405	0.787972	0.19106	AT4G01150.1	1.14835	4.42456e-05	0.0449624	1	AT4G01150.1	1.63885	0.0754725
plastid	AT4G15560.1	| Deoxyxylulose-5-phosphate synthase | Chr4:8884218-8887254 FORWARD LENGTH=717 | 201606	5	5	6.876	76834.3	AT4G15560.1	10.1675	0.000216807	0.00185179	1	AT4G15560.1	8.42751	6.42182e-05	0.000634936	1	AT4G15560.1	8.35772	0.000472919	0.0140623	1	AT4G15560.1	8.59017	5.05131e-05	0.00124777	1	AT4G15560.1	2.61975	0.00851782	0.209503	0.918298	AT4G15560.1	3.16939	0.00118838	0.0791928	0.999316	AT4G15560.1	3.01533	0.00432723	0.499795	0.974765	AT4G15560.1	1.20647	0.388275	0.804409	0.123829	AT4G15560.1	1.21654	0.437244
plasma membrane	AT1G66970.1	| SHV3-like 2 | Chr1:24992746-24996005 REVERSE LENGTH=763 | 201606	6	4	5.897	83790.4	AT1G66970.1	10.1499	0.000189666	0.00171205	1	AT1G66970.1	9.20238	0.00034125	0.00187764	0.999999	AT1G66970.1	5.87337	0.00530575	0.042263	0.979065	AT1G66970.1	1.65937	0.228875	0.342402	0.204692	AT1G66970.1	1.12611	0.922007	0.977133	0.050844	AT1G66970.1	0.91608	0.82922	0.964873	0.0541191	AT1G66970.1	1.00806	0.859304	0.956892	0.0527756	AT1G66970.1	1.10297	0.609482	0.890903	0.0743764	AT1G66970.1	1.72813	0.0640905
plastid	ATCG00170.1	| DNA-directed RNA polymerase family protein | ChrC:15938-20068 REVERSE LENGTH=1376 | 201606	5	5	4.809	156372	ATCG00170.1	10.1336	0.000151695	0.00150812	1	ATCG00170.1	12.3882	3.30787e-05	0.000438918	1	ATCG00170.1	6.69677	0.00192671	0.0261108	0.999267	ATCG00170.1	3.53854	0.00279425	0.0145198	0.990608	ATCG00170.1	2.29134	0.325625	0.710226	0.147203	ATCG00170.1	1.90687	0.544241	0.880278	0.0841002	ATCG00170.1	1.59918	0.0940595	0.742917	0.393593	ATCG00170.1	0.818007	0.261642	0.787478	0.182472	ATCG00170.1	1.51321	0.149707
plastid	ATCG00430.1	| photosystem II reaction center protein G | ChrC:49257-49934 REVERSE LENGTH=225 | 201606	3	3	2.904	25367.3	ATCG00430.1	10.0905	0.000457498	0.00298844	0.999992	ATCG00430.1	8.54839	0.00063171	0.0029185	0.999954	ATCG00430.1	6.66827	0.0046434	0.0393627	0.985105	ATCG00430.1	3.30996	0.00744722	0.0281322	0.933323	ATCG00430.1	0.90582	0.953325	0.98511	0.0503014	ATCG00430.1	0.888965	0.971818	0.992933	0.0501098	ATCG00430.1	0.624065	0.354482	0.810716	0.135026	ATCG00430.1	1.18039	0.0480722	0.605991	0.54594	ATCG00430.1	1.51321	0.00161966
plastid	AT4G17090.1	| chloroplast beta-amylase | Chr4:9605266-9607250 REVERSE LENGTH=548 | 201606	6	6	6.864	61353.5	AT4G17090.1	10.0611	1.34605e-05	0.000373805	1	AT4G17090.1	8.28009	1.37696e-05	0.000247753	1	AT4G17090.1	6.03914	0.00293247	0.0313085	0.996291	AT4G17090.1	3.39691	0.000104047	0.00186743	1	AT4G17090.1	1.33799	0.0554612	0.417198	0.526141	AT4G17090.1	0.916675	0.557404	0.883745	0.0818131	AT4G17090.1	1.55639	0.311693	0.799856	0.153732	AT4G17090.1	1.2151	0.2349	0.7799	0.200705	AT4G17090.1	1.66599	0.0796774
plastid	ATCG00470.1	| ATP synthase epsilon chain | ChrC:52265-52663 REVERSE LENGTH=132 | 201606	6	6	7.969	14499.3	ATCG00470.1	9.99961	2.33709e-06	0.000146631	1	ATCG00470.1	8.80967	1.72993e-06	7.22883e-05	1	ATCG00470.1	5.53947	0.00358274	0.0350248	0.992895	ATCG00470.1	3.31808	7.04358e-05	0.00148126	1	ATCG00470.1	1.26985	0.298642	0.692179	0.160286	ATCG00470.1	1.24003	0.283708	0.733215	0.168363	ATCG00470.1	1.07174	0.481156	0.842546	0.096855	ATCG00470.1	1.13507	0.0336789	0.564761	0.630344	ATCG00470.1	1.80516	0.0307584
cytosol	AT1G67950.1;AT1G67950.2;AT1G67950.3;AT1G67950.4	| RNA-binding (RRM/RBD/RNP motifs) family protein | Chr1:25478884-25480420 REVERSE LENGTH=278 | 201606 [AT1G67950.1,AT1G67950.2,AT1G67950.3,AT1G67950.4]	2	1	1.963	29879	AT1G67950.1;AT1G67950.2;AT1G67950.3;AT1G67950.4	9.92368	0.96909	0.977124	0.0501321	AT1G67950.1;AT1G67950.2;AT1G67950.3;AT1G67950.4	0	0.285591	0.357834	0.167308	AT1G67950.1;AT1G67950.2;AT1G67950.3;AT1G67950.4	3.79974	0.93403	0.959325	0.0505514	AT1G67950.1;AT1G67950.2;AT1G67950.3;AT1G67950.4	0	0.285591	0.406661	0.167308	AT1G67950.1;AT1G67950.2;AT1G67950.3;AT1G67950.4	0.717566	0.843305	0.948368	0.0534553	AT1G67950.1;AT1G67950.2;AT1G67950.3;AT1G67950.4	22.2025	0.998204	0.998856	0.0500004	AT1G67950.1;AT1G67950.2;AT1G67950.3;AT1G67950.4	0	0.285591	0.789232	0.167308	AT1G67950.1;AT1G67950.2;AT1G67950.3;AT1G67950.4	Infinite (div by 0)	0.355918	0.803914	0.135611	AT1G67950.1;AT1G67950.2;AT1G67950.3;AT1G67950.4	2.61167	0.901845
plastid	AT3G23710.1	| Tic22-like family protein | Chr3:8534061-8536148 FORWARD LENGTH=313 | 201606	2	2	1.993	34575.8	AT3G23710.1	9.89876	0.225206	0.307413	0.207587	AT3G23710.1	9.91276	0.251967	0.322138	0.187936	AT3G23710.1	10.7028	0.106531	0.23108	0.356589	AT3G23710.1	5.17049	0.105531	0.190586	0.366177	AT3G23710.1	1.49282	0.22725	0.638548	0.205966	AT3G23710.1	1.82496	0.107476	0.563149	0.361892	AT3G23710.1	1.51546	0.185281	0.763824	0.244258	AT3G23710.1	0.998588	0.956773	0.992926	0.0502653	AT3G23710.1	0.924874	0.724711
peroxisome	AT3G14420.6	| Aldolase-type TIM barrel family protein | Chr3:4821899-4823899 FORWARD LENGTH=366 | 201606	21	6	24.905	40317.8	AT3G14420.6	9.84689	5.59513e-07	7.04906e-05	1	AT3G14420.6	9.12525	2.5734e-07	2.66899e-05	1	AT3G14420.6	6.92782	5.34051e-05	0.0063706	1	AT3G14420.6	3.9269	1.92772e-05	0.000725681	1	AT3G14420.6	1.72071	0.0527187	0.407788	0.539177	AT3G14420.6	1.35458	0.0154094	0.254254	0.826993	AT3G14420.6	1.13723	0.146353	0.756486	0.292619	AT3G14420.6	1.07908	0.17436	0.748878	0.255614	AT3G14420.6	1.42136	0.00956439
plastid	AT4G09650.1	| F-type H+-transporting ATPase subunit delta | Chr4:6100799-6101503 FORWARD LENGTH=234 | 201606	18	15	19.909	25669.1	AT4G09650.1	9.82918	3.25641e-06	0.000177947	1	AT4G09650.1	8.59014	4.95307e-06	0.000131788	1	AT4G09650.1	6.38969	0.000141894	0.00890255	1	AT4G09650.1	3.5643	6.27882e-05	0.0013934	1	AT4G09650.1	1.57093	0.0561615	0.419867	0.522919	AT4G09650.1	1.49839	0.00892627	0.196378	0.912571	AT4G09650.1	1.05538	0.54843	0.860236	0.0833596	AT4G09650.1	1.14424	0.0317202	0.560329	0.644229	AT4G09650.1	1.53829	0.00121644
plastid	AT5G42390.1	| Insulinase (Peptidase family M16) family protein | Chr5:16945308-16952647 FORWARD LENGTH=1265 | 201606	10	10	12.862	140610	AT5G42390.1	9.63485	2.14364e-05	0.00048852	1	AT5G42390.1	7.40325	1.67787e-05	0.000282349	1	AT5G42390.1	7.17529	1.13629e-05	0.00276839	1	AT5G42390.1	4.10617	2.69402e-05	0.000875291	1	AT5G42390.1	2.12194	0.0171447	0.267159	0.806376	AT5G42390.1	1.89083	0.000937365	0.069039	0.999729	AT5G42390.1	1.659	0.0362673	0.740247	0.634696	AT5G42390.1	1.30144	0.148172	0.730531	0.288173	AT5G42390.1	1.34278	0.12197
plastid	AT3G19800.1;AT3G19800.2	| E3 ubiquitin-protein ligase%2C putative (DUF177) | Chr3:6876153-6877471 FORWARD LENGTH=229 | 201606 [AT3G19800.1,AT3G19800.2]	2	2	1.993	25289.4	AT3G19800.1;AT3G19800.2	9.52733	0.0468444	0.0849922	0.569549	AT3G19800.1;AT3G19800.2	14.8611	0.0301729	0.0543754	0.680225	AT3G19800.1;AT3G19800.2	14.1944	0.0675113	0.174869	0.474258	AT3G19800.1;AT3G19800.2	10.8068	0.0418253	0.0955804	0.598569	AT3G19800.1;AT3G19800.2	148.723	0.282747	0.68189	0.168905	AT3G19800.1;AT3G19800.2	0.831351	0.349207	0.769487	0.137128	AT3G19800.1;AT3G19800.2	3.32613	0.217783	0.771444	0.21366	AT3G19800.1;AT3G19800.2	0.641091	0.219611	0.778246	0.212538	AT3G19800.1;AT3G19800.2	0.671206	0.323596
nucleus,cytosol	AT3G16810.1	| pumilio 24 | Chr3:5723436-5727539 REVERSE LENGTH=641 | 201606	2	1	1.919	71605.5	AT3G16810.1	9.51714	0.395279	0.485571	0.120386	AT3G16810.1	1.49836	0.439291	0.514514	0.107278	AT3G16810.1	0.638952	0.272977	0.419875	0.167013	AT3G16810.1	0.154965	0.21534	0.32687	0.215726	AT3G16810.1	0.760616	0.481858	0.79743	0.096695	AT3G16810.1	1.01779	0.621814	0.906241	0.0721667	AT3G16810.1	0.663026	0.581343	0.871916	0.0779422	AT3G16810.1	6.35169	0.684485	0.910834	0.065235	AT3G16810.1	14.8949	0.109219
plastid	AT4G32260.1	| ATPase%2C F0 complex%2C subunit B/B'%2C bacterial/chloroplast | Chr4:15573859-15574586 REVERSE LENGTH=219 | 201606	11	10	15.928	23919	AT4G32260.1	9.45977	3.71142e-06	0.000190179	1	AT4G32260.1	7.97533	1.46501e-06	6.58867e-05	1	AT4G32260.1	5.74554	0.000254962	0.0111671	1	AT4G32260.1	3.57109	1.54467e-05	0.00063541	1	AT4G32260.1	1.58429	0.0170457	0.267159	0.807525	AT4G32260.1	1.33812	0.0148836	0.250337	0.833441	AT4G32260.1	0.9791	0.861841	0.957253	0.052675	AT4G32260.1	1.18613	0.0439768	0.603514	0.567273	AT4G32260.1	1.64646	0.00786129
plastid	AT3G50270.1	| HXXXD-type acyl-transferase family protein | Chr3:18635926-18637278 FORWARD LENGTH=450 | 201606	5	5	4.934	49807	AT3G50270.1	9.45785	9.2893e-05	0.0011329	1	AT3G50270.1	7.34463	0.000233457	0.00146292	1	AT3G50270.1	7.91486	0.000213778	0.0106644	1	AT3G50270.1	4.11926	8.83674e-05	0.00170107	1	AT3G50270.1	1.02324	0.893068	0.965859	0.051593	AT3G50270.1	1.00032	0.990566	0.995988	0.0500123	AT3G50270.1	0.856197	0.380523	0.815263	0.125372	AT3G50270.1	1.28772	0.233616	0.7799	0.201655	AT3G50270.1	1.19495	0.384785
plasma membrane,cytosol	AT5G42660.1	| DNA-directed RNA polymerase subunit beta (DUF616) | Chr5:17103062-17105785 REVERSE LENGTH=463 | 201606	2	2	1.901	53062.4	AT5G42660.1	9.44537	0.0105631	0.0268647	0.889867	AT5G42660.1	16.0282	0.000401191	0.00212602	0.999996	AT5G42660.1	17.1089	0.00173267	0.0247344	0.999543	AT5G42660.1	6.81474	0.000919009	0.00697166	0.99975	AT5G42660.1	1.8138	0.108406	0.505431	0.359878	AT5G42660.1	1.64819	0.298485	0.74527	0.160367	AT5G42660.1	1.27903	0.557208	0.861889	0.0818464	AT5G42660.1	0.589296	0.120608	0.71572	0.331646	AT5G42660.1	0.552073	0.149464
plastid	AT5G42650.1	| allene oxide synthase | Chr5:17097803-17099359 REVERSE LENGTH=518 | 201606	9	7	9.906	58199.6	AT5G42650.1	9.41682	0.000250446	0.00203318	1	AT5G42650.1	6.79434	2.67629e-05	0.000372627	1	AT5G42650.1	4.79748	0.00237495	0.0286079	0.998278	AT5G42650.1	2.15582	0.00287185	0.0147941	0.989947	AT5G42650.1	1.50092	0.215624	0.62862	0.215484	AT5G42650.1	1.14936	0.365911	0.780357	0.130646	AT5G42650.1	1.13388	0.379301	0.814352	0.125799	AT5G42650.1	1.38598	0.184913	0.755267	0.244288	AT5G42650.1	1.96287	0.0534524
plastid	AT3G52720.1;AT3G52720.2;AT3G52720.3;AT3G52720.4	| alpha carbonic anhydrase 1 | Chr3:19538804-19541116 REVERSE LENGTH=284 | 201606 [AT3G52720.1,AT3G52720.2,AT3G52720.3,AT3G52720.4]	2	2	1.978	32697.7	AT3G52720.1;AT3G52720.2;AT3G52720.3;AT3G52720.4	9.39061	0.0891909	0.14384	0.406482	AT3G52720.1;AT3G52720.2;AT3G52720.3;AT3G52720.4	6.32636	0.241751	0.310917	0.195054	AT3G52720.1;AT3G52720.2;AT3G52720.3;AT3G52720.4	18.6584	0.0060575	0.0453375	0.971354	AT3G52720.1;AT3G52720.2;AT3G52720.3;AT3G52720.4	19.3502	8.8341e-05	0.00170107	1	AT3G52720.1;AT3G52720.2;AT3G52720.3;AT3G52720.4	3.07942	0.0795126	0.4627	0.434767	AT3G52720.1;AT3G52720.2;AT3G52720.3;AT3G52720.4	5.90218	0.0204786	0.298201	0.769544	AT3G52720.1;AT3G52720.2;AT3G52720.3;AT3G52720.4	1.70358	0.757433	0.924195	0.0585057	AT3G52720.1;AT3G52720.2;AT3G52720.3;AT3G52720.4	1.48436	0.741546	0.93193	0.0599619	AT3G52720.1;AT3G52720.2;AT3G52720.3;AT3G52720.4	0.503292	0.280816
plastid	AT5G36700.1;AT5G36700.2;AT5G36700.4;AT5G36790.1;AT5G36790.2;AT5G36790.3	| 2-phosphoglycolate phosphatase 1 | Chr5:14421929-14424430 REVERSE LENGTH=362 | 201606 [AT5G36700.1,AT5G36700.2,AT5G36700.4,AT5G36790.1,AT5G36790.2,AT5G36790.3]	11	10	12.846	39762.9	AT5G36700.1;AT5G36700.2;AT5G36700.4;AT5G36790.1;AT5G36790.2;AT5G36790.3	9.36519	4.13302e-07	6.01427e-05	1	AT5G36700.1;AT5G36700.2;AT5G36700.4;AT5G36790.1;AT5G36790.2;AT5G36790.3	8.44755	2.34361e-07	2.5341e-05	1	AT5G36700.1;AT5G36700.2;AT5G36700.4;AT5G36790.1;AT5G36790.2;AT5G36790.3	6.95042	0.000273164	0.0115685	1	AT5G36700.1;AT5G36700.2;AT5G36700.4;AT5G36790.1;AT5G36790.2;AT5G36790.3	4.4124	9.72043e-07	0.000196741	1	AT5G36700.1;AT5G36700.2;AT5G36700.4;AT5G36790.1;AT5G36790.2;AT5G36790.3	1.59322	0.0211288	0.285294	0.762765	AT5G36700.1;AT5G36700.2;AT5G36700.4;AT5G36790.1;AT5G36790.2;AT5G36790.3	1.46717	0.00101247	0.0724697	0.99963	AT5G36700.1;AT5G36700.2;AT5G36700.4;AT5G36790.1;AT5G36790.2;AT5G36790.3	1.09613	0.344665	0.810498	0.13898	AT5G36700.1;AT5G36700.2;AT5G36700.4;AT5G36790.1;AT5G36790.2;AT5G36790.3	1.10863	0.099801	0.695384	0.373599	AT5G36700.1;AT5G36700.2;AT5G36700.4;AT5G36790.1;AT5G36790.2;AT5G36790.3	1.34743	0.0671309
plastid	ATCG01110.1	| NAD(P)H dehydrogenase subunit H | ChrC:122011-123192 REVERSE LENGTH=393 | 201606	8	8	8.872	45505.1	ATCG01110.1	9.36274	0.0129973	0.0315888	0.857345	ATCG01110.1	10.8372	0.0048764	0.0129816	0.968042	ATCG01110.1	5.67602	0.0378078	0.124665	0.634399	ATCG01110.1	2.89504	0.0482571	0.106166	0.561916	ATCG01110.1	0.782354	0.860897	0.955543	0.0527122	ATCG01110.1	0.795267	0.839058	0.96569	0.053649	ATCG01110.1	0.583994	0.899633	0.966694	0.051402	ATCG01110.1	0.863945	0.439961	0.828862	0.10811	ATCG01110.1	1.64953	0.340002
peroxisome	AT5G48880.1	| peroxisomal 3-keto-acyl-CoA thiolase 2 | Chr5:19814576-19816775 REVERSE LENGTH=414 | 201606	7	7	7.863	43172.5	AT5G48880.1	9.28556	0.0039471	0.0130424	0.979156	AT5G48880.1	11.7354	4.39234e-05	0.000513297	1	AT5G48880.1	10.9493	0.000307975	0.0120108	1	AT5G48880.1	6.76296	8.58868e-05	0.00167876	1	AT5G48880.1	3.58441	0.00328842	0.12251	0.986101	AT5G48880.1	2.33729	0.0058294	0.157119	0.955611	AT5G48880.1	1.0629	0.791691	0.934364	0.0561968	AT5G48880.1	0.791244	0.336865	0.802699	0.143404	AT5G48880.1	0.848048	0.497861
plastid	AT4G00490.1	| beta-amylase 2 | Chr4:222422-224862 FORWARD LENGTH=542 | 201606	7	7	6.943	61398.6	AT4G00490.1	9.22124	0.030565	0.0609622	0.677081	AT4G00490.1	10.7093	8.83353e-05	0.000791746	1	AT4G00490.1	5.28328	0.00497163	0.0405793	0.982211	AT4G00490.1	3.41764	0.0407581	0.0938526	0.605157	AT4G00490.1	1.9623	0.0162505	0.266072	0.816872	AT4G00490.1	1.97643	0.0144296	0.250337	0.839085	AT4G00490.1	1.1926	0.721991	0.911263	0.0613394	AT4G00490.1	0.861049	0.491811	0.845916	0.095348	AT4G00490.1	1.74536	0.653043
plastid	AT2G47400.1	| CP12 domain-containing protein 1 | Chr2:19446889-19447263 FORWARD LENGTH=124 | 201606	2	2	1.994	13486.6	AT2G47400.1	9.14145	0.463769	0.551058	0.100969	AT2G47400.1	7.26255	0.00101832	0.00412765	0.999621	AT2G47400.1	4.05485	0.680388	0.778593	0.0640276	AT2G47400.1	3.73841	0.00396284	0.0181281	0.978979	AT2G47400.1	2.27812	0.104901	0.497499	0.367586	AT2G47400.1	0.955077	0.535353	0.876567	0.085712	AT2G47400.1	0.894507	0.557642	0.861974	0.0817729	AT2G47400.1	1.25871	0.573633	0.879023	0.0797935	AT2G47400.1	2.25445	0.747037
plastid	AT5G64840.1;AT5G09930.1	| general control non-repressible 5 | Chr5:25916956-25919693 REVERSE LENGTH=692 | 201606	6	4	5.896	78004	AT5G64840.1;AT5G09930.1	9.13158	0.00160715	0.00701678	0.998057	AT5G64840.1;AT5G09930.1	9.93857	0.00105003	0.00421506	0.999573	AT5G64840.1;AT5G09930.1	10.4266	0.00376645	0.0358407	0.991735	AT5G64840.1;AT5G09930.1	10.7422	0.000691652	0.00576225	0.999929	AT5G64840.1;AT5G09930.1	4.96306	0.00945429	0.214669	0.905195	AT5G64840.1;AT5G09930.1	3.22832	0.0639599	0.48073	0.489633	AT5G64840.1;AT5G09930.1	2.5848	0.030698	0.722876	0.676022	AT5G64840.1;AT5G09930.1	0.918803	0.581601	0.880517	0.0785239	AT5G64840.1;AT5G09930.1	0.875797	0.425636
plastid	AT1G65230.1	| transmembrane protein%2C putative (DUF2358) | Chr1:24229167-24230764 FORWARD LENGTH=286 | 201606	2	2	2.975	32736.8	AT1G65230.1	9.12687	0.00667629	0.0192668	0.944057	AT1G65230.1	12.471	0.000665822	0.00301309	0.999941	AT1G65230.1	3.71856	0.0622195	0.167036	0.496469	AT1G65230.1	2.39411	0.045399	0.101414	0.577592	AT1G65230.1	1.51177	0.541326	0.829639	0.0846228	AT1G65230.1	1.23575	0.540388	0.879005	0.0847921	AT1G65230.1	0.840356	0.746479	0.920253	0.0593315	AT1G65230.1	0.731844	0.264456	0.787478	0.180712	AT1G65230.1	2.45441	0.119965
plastid	AT5G14060.1;AT5G14060.2;AT5G14060.3;AT3G02020.1	| Aspartate kinase family protein | Chr5:4536143-4538993 FORWARD LENGTH=544 | 201606 [AT5G14060.1,AT5G14060.2,AT5G14060.3]	2	2	1.994	59605.5	AT5G14060.1;AT5G14060.2;AT5G14060.3;AT3G02020.1	9.10776	9.03276e-05	0.00112787	1	AT5G14060.1;AT5G14060.2;AT5G14060.3;AT3G02020.1	7.28841	4.55719e-05	0.000518222	1	AT5G14060.1;AT5G14060.2;AT5G14060.3;AT3G02020.1	3.9377	0.0328494	0.115706	0.672679	AT5G14060.1;AT5G14060.2;AT5G14060.3;AT3G02020.1	4.14357	0.000444739	0.00437169	0.999993	AT5G14060.1;AT5G14060.2;AT5G14060.3;AT3G02020.1	3.62212	0.00235273	0.110993	0.993997	AT5G14060.1;AT5G14060.2;AT5G14060.3;AT3G02020.1	2.14177	0.00417517	0.139593	0.976551	AT5G14060.1;AT5G14060.2;AT5G14060.3;AT3G02020.1	2.72021	0.0310088	0.722876	0.67356	AT5G14060.1;AT5G14060.2;AT5G14060.3;AT3G02020.1	1.24962	0.14126	0.727088	0.298045	AT5G14060.1;AT5G14060.2;AT5G14060.3;AT3G02020.1	2.31296	0.0375954
plastid	AT4G21280.1	| photosystem II subunit QA | Chr4:11334446-11335587 FORWARD LENGTH=223 | 201606	15	13	18.676	23796.3	AT4G21280.1	9.09765	4.71396e-06	0.000210143	1	AT4G21280.1	7.78565	2.32142e-06	8.80406e-05	1	AT4G21280.1	5.99928	0.00223587	0.0277816	0.99864	AT4G21280.1	3.3659	2.03256e-05	0.000753976	1	AT4G21280.1	1.48289	0.0102711	0.223068	0.893878	AT4G21280.1	1.26067	0.0643744	0.481921	0.487987	AT4G21280.1	0.88332	0.262745	0.788574	0.180886	AT4G21280.1	1.16851	0.119548	0.71572	0.333563	AT4G21280.1	1.51646	0.0830341
plastid	ATCG00820.1	| ribosomal protein S19 | ChrC:84005-84283 REVERSE LENGTH=92 | 201606	3	3	2.984	10577	ATCG00820.1	9.0113	1.25909e-05	0.000353518	1	ATCG00820.1	8.28903	1.57983e-05	0.000273084	1	ATCG00820.1	7.49632	0.00291667	0.0312711	0.996359	ATCG00820.1	3.40402	0.000623601	0.00538969	0.999957	ATCG00820.1	2.1249	0.0961575	0.481101	0.388284	ATCG00820.1	2.23757	0.0109411	0.218909	0.884705	ATCG00820.1	1.5681	0.161525	0.763824	0.271878	ATCG00820.1	1.08714	0.249775	0.781634	0.19021	ATCG00820.1	1.2021	0.321186
mitochondrion	AT5G03370.1	| acylphosphatase family | Chr5:825798-827020 REVERSE LENGTH=171 | 201606	2	2	1.984	18888.3	AT5G03370.1	8.9825	0.000192002	0.00171486	1	AT5G03370.1	9.352	1.36263e-05	0.000247753	1	AT5G03370.1	3.40466	0.060753	0.164665	0.503003	AT5G03370.1	2.29626	0.0173299	0.0502974	0.804235	AT5G03370.1	1.16402	0.416575	0.767597	0.113736	AT5G03370.1	1.62925	0.00642723	0.165803	0.947489	AT5G03370.1	1.51065	0.146737	0.756486	0.29206	AT5G03370.1	0.960489	0.721653	0.925446	0.0616513	AT5G03370.1	2.6383	0.0418368
mitochondrion	AT1G66130.1	| NAD(P)-binding Rossmann-fold superfamily protein | Chr1:24615040-24616742 FORWARD LENGTH=364 | 201606	2	2	1.983	40097.9	AT1G66130.1	8.96348	0.000408101	0.00280742	0.999996	AT1G66130.1	9.05364	0.0005275	0.00255717	0.999982	AT1G66130.1	5.88997	0.00381813	0.0358407	0.991393	AT1G66130.1	4.14816	0.00219	0.0123388	0.995072	AT1G66130.1	2.17102	0.214542	0.628415	0.216408	AT1G66130.1	2.43219	0.20121	0.674966	0.228377	AT1G66130.1	1.15899	0.670167	0.893784	0.0663791	AT1G66130.1	0.990041	0.993838	0.998274	0.0500054	AT1G66130.1	1.52182	0.00853433
plastid	AT4G28730.1;AT4G28730.2	| Glutaredoxin family protein | Chr4:14199174-14200712 FORWARD LENGTH=174 | 201606 [AT4G28730.1,AT4G28730.2]	2	2	2.984	18813.4	AT4G28730.1;AT4G28730.2	8.95977	0.0463329	0.0843352	0.572367	AT4G28730.1;AT4G28730.2	8.7873	0.0224921	0.0425242	0.748957	AT4G28730.1;AT4G28730.2	16.6241	0.0283495	0.106169	0.711718	AT4G28730.1;AT4G28730.2	9.4738	0.0174288	0.0504402	0.803097	AT4G28730.1;AT4G28730.2	7.33118	0.171104	0.596033	0.260103	AT4G28730.1;AT4G28730.2	1.89037	0.413052	0.806118	0.114794	AT4G28730.1;AT4G28730.2	1.03654	0.623636	0.882081	0.0719277	AT4G28730.1;AT4G28730.2	1.01963	0.780802	0.941334	0.0570627	AT4G28730.1;AT4G28730.2	0.538963	0.314304
plastid	AT2G42220.1	| Rhodanese/Cell cycle control phosphatase superfamily protein | Chr2:17592105-17593305 FORWARD LENGTH=234 | 201606	5	4	4.902	25510.8	AT2G42220.1	8.94953	1.88205e-05	0.000446943	1	AT2G42220.1	8.03542	2.40803e-05	0.000351543	1	AT2G42220.1	7.5011	0.000214044	0.0106644	1	AT2G42220.1	4.54418	7.0841e-05	0.00148154	1	AT2G42220.1	1.92628	0.00380765	0.133124	0.980703	AT2G42220.1	1.2647	0.123776	0.601365	0.32944	AT2G42220.1	1.07496	0.471897	0.839276	0.09901	AT2G42220.1	1.11376	0.336184	0.802699	0.143696	AT2G42220.1	1.1931	0.179929
peroxisome	AT1G23310.1	| glutamate:glyoxylate aminotransferase | Chr1:8268720-8271329 REVERSE LENGTH=481 | 201606	25	18	28.689	53302.6	AT1G23310.1	8.94266	1.11762e-05	0.000330218	1	AT1G23310.1	7.62994	1.94844e-05	0.000312366	1	AT1G23310.1	6.65186	0.000388711	0.0133534	1	AT1G23310.1	3.73423	0.000221375	0.00286524	1	AT1G23310.1	1.47989	0.0587967	0.426864	0.511154	AT1G23310.1	1.28985	0.0869001	0.521035	0.41284	AT1G23310.1	0.932476	0.728586	0.912581	0.0607762	AT1G23310.1	1.17205	0.00919461	0.44035	0.879783	AT1G23310.1	1.34438	0.0125847
peroxisome	AT1G70580.1;AT1G70580.2;AT1G70580.3;AT1G70580.4	| alanine-2-oxoglutarate aminotransferase 2 | Chr1:26613222-26615845 FORWARD LENGTH=481 | 201606 [AT1G70580.1,AT1G70580.2,AT1G70580.3,AT1G70580.4]	11	4	13.952	53445.7	AT1G70580.1;AT1G70580.2;AT1G70580.3;AT1G70580.4	8.94266	1.11762e-05	0.000330218	1	AT1G70580.1;AT1G70580.2;AT1G70580.3;AT1G70580.4	7.62994	1.94844e-05	0.000312366	1	AT1G70580.1;AT1G70580.2;AT1G70580.3;AT1G70580.4	6.65186	0.000388711	0.0133534	1	AT1G70580.1;AT1G70580.2;AT1G70580.3;AT1G70580.4	3.73423	0.000221375	0.00286524	1	AT1G70580.1;AT1G70580.2;AT1G70580.3;AT1G70580.4	1.47989	0.0587967	0.426864	0.511154	AT1G70580.1;AT1G70580.2;AT1G70580.3;AT1G70580.4	1.28985	0.0869001	0.521035	0.41284	AT1G70580.1;AT1G70580.2;AT1G70580.3;AT1G70580.4	0.932476	0.728586	0.912581	0.0607762	AT1G70580.1;AT1G70580.2;AT1G70580.3;AT1G70580.4	1.17205	0.00919461	0.44035	0.879783	AT1G70580.1;AT1G70580.2;AT1G70580.3;AT1G70580.4	1.34438	0.0125847
peroxisome	AT5G08640.1;AT5G08640.2	| flavonol synthase 1 | Chr5:2804009-2805175 FORWARD LENGTH=336 | 201606 [AT5G08640.1,AT5G08640.2]	10	9	9.926	38282.7	AT5G08640.1;AT5G08640.2	8.88206	3.90137e-06	0.000191088	1	AT5G08640.1;AT5G08640.2	9.966	3.10992e-06	0.000101312	1	AT5G08640.1;AT5G08640.2	9.6276	0.00088576	0.0192413	0.999989	AT5G08640.1;AT5G08640.2	9.37914	3.92645e-05	0.0011055	1	AT5G08640.1;AT5G08640.2	5.73413	0.000276578	0.0540604	1	AT5G08640.1;AT5G08640.2	4.26659	2.40274e-05	0.0104088	1	AT5G08640.1;AT5G08640.2	1.35032	0.111056	0.742917	0.354254	AT5G08640.1;AT5G08640.2	0.891236	0.0685804	0.653012	0.46082	AT5G08640.1;AT5G08640.2	0.922562	0.860852
plastid	AT3G15850.1	| fatty acid desaturase 5 | Chr3:5359087-5360998 FORWARD LENGTH=371 | 201606	2	2	1.994	42580.5	AT3G15850.1	8.87337	0.0158939	0.0367651	0.821133	AT3G15850.1	5.12002	0.0876165	0.132481	0.410831	AT3G15850.1	9.62742	0.0395018	0.12852	0.622322	AT3G15850.1	11.0194	0.0128383	0.0405749	0.859414	AT3G15850.1	4.18817	0.0725903	0.452296	0.457556	AT3G15850.1	7.60101	0.0589961	0.465529	0.510286	AT3G15850.1	2.99973	0.140777	0.751498	0.300983	AT3G15850.1	1.73307	0.168045	0.745213	0.262843	AT3G15850.1	0.921677	0.758642
mitochondrion	AT1G22660.1;AT1G22660.2;AT1G22660.4	| Polynucleotide adenylyltransferase family protein | Chr1:8017410-8021538 FORWARD LENGTH=605 | 201606 [AT1G22660.1,AT1G22660.2,AT1G22660.4]	2	2	1.979	68957.6	AT1G22660.1;AT1G22660.2;AT1G22660.4	8.76158	9.32023e-05	0.0011329	1	AT1G22660.1;AT1G22660.2;AT1G22660.4	7.23015	9.96174e-05	0.000869855	1	AT1G22660.1;AT1G22660.2;AT1G22660.4	6.84221	0.00135561	0.0228119	0.999863	AT1G22660.1;AT1G22660.2;AT1G22660.4	3.33282	0.00209948	0.0120244	0.995627	AT1G22660.1;AT1G22660.2;AT1G22660.4	1.43961	0.339973	0.720494	0.140936	AT1G22660.1;AT1G22660.2;AT1G22660.4	1.29863	0.341715	0.766985	0.140204	AT1G22660.1;AT1G22660.2;AT1G22660.4	1.22778	0.35401	0.810716	0.135211	AT1G22660.1;AT1G22660.2;AT1G22660.4	1.21181	0.0709002	0.656153	0.452926	AT1G22660.1;AT1G22660.2;AT1G22660.4	1.28052	0.128252
golgi	AT1G24460.2	| TGN-related%2C localized SYP41 interacting protein | Chr1:8666072-8672338 FORWARD LENGTH=1732 | 201606	11	11	10.772	193596	AT1G24460.2	8.7518	0.0897642	0.144636	0.404921	AT1G24460.2	8.71445	0.13823	0.194685	0.30495	AT1G24460.2	11.1108	0.00963132	0.0579247	0.927649	AT1G24460.2	6.93172	0.0053675	0.022123	0.961734	AT1G24460.2	2.92413	0.0408632	0.37635	0.604502	AT1G24460.2	2.07781	0.479473	0.846658	0.0972409	AT1G24460.2	1.91903	0.113948	0.743909	0.348306	AT1G24460.2	1.00429	0.923712	0.983525	0.0508288	AT1G24460.2	0.787685	0.463949
plastid	AT3G17930.1	| transmembrane protein | Chr3:6142307-6143246 REVERSE LENGTH=190 | 201606	3	3	2.967	20912.9	AT3G17930.1	8.59076	0.000855533	0.00454793	0.999815	AT3G17930.1	7.82306	0.0518886	0.0856163	0.543259	AT3G17930.1	6.22407	0.000899292	0.0192413	0.999988	AT3G17930.1	2.02861	0.0273223	0.0704117	0.704078	AT3G17930.1	1.31344	0.338057	0.719617	0.141748	AT3G17930.1	3.282	0.196309	0.673972	0.233068	AT3G17930.1	1.84474	0.0576007	0.742917	0.516424	AT3G17930.1	1.09813	0.511453	0.849575	0.0911546	AT3G17930.1	1.38025	0.402155
plastid	AT5G17170.1;AT5G17170.2	| rubredoxin family protein | Chr5:5649335-5650975 FORWARD LENGTH=271 | 201606 [AT5G17170.1,AT5G17170.2]	4	4	4.985	28459.3	AT5G17170.1;AT5G17170.2	8.53714	0.00373303	0.0125554	0.981514	AT5G17170.1;AT5G17170.2	9.67343	0.000795712	0.00339816	0.999865	AT5G17170.1;AT5G17170.2	7.40654	0.00658414	0.0475968	0.965518	AT5G17170.1;AT5G17170.2	4.242	0.00541667	0.0223075	0.96109	AT5G17170.1;AT5G17170.2	2.02636	0.08196	0.462801	0.427249	AT5G17170.1;AT5G17170.2	1.8699	0.119573	0.588866	0.337265	AT5G17170.1;AT5G17170.2	1.51544	0.185244	0.763824	0.244298	AT5G17170.1;AT5G17170.2	0.882536	0.450676	0.832686	0.105252	AT5G17170.1;AT5G17170.2	1.15265	0.787119
plastid	AT1G73110.1	| P-loop containing nucleoside triphosphate hydrolases superfamily protein | Chr1:27494344-27496844 REVERSE LENGTH=432 | 201606	11	9	10.913	48326.8	AT1G73110.1	8.49489	7.6618e-07	8.28452e-05	1	AT1G73110.1	7.35482	2.83183e-05	0.000387908	1	AT1G73110.1	7.65616	5.55024e-06	0.00251867	1	AT1G73110.1	4.70513	1.46761e-06	0.000226011	1	AT1G73110.1	2.03812	0.000841284	0.0831426	0.999828	AT1G73110.1	1.80651	0.002911	0.120274	0.989606	AT1G73110.1	1.2358	0.0900154	0.742917	0.404241	AT1G73110.1	1.15501	0.234554	0.7799	0.20096	AT1G73110.1	1.10955	0.166756
plastid	ATCG01010.1	| NADH-Ubiquinone oxidoreductase (complex I)%2C chain 5 protein | ChrC:110398-112638 REVERSE LENGTH=746 | 201606	2	2	1.975	85246	ATCG01010.1	8.42871	0.00536761	0.0163932	0.961733	ATCG01010.1	6.84542	0.0230118	0.0433454	0.743833	ATCG01010.1	8.67059	0.0651679	0.170977	0.48384	ATCG01010.1	1.42317	0.436535	0.551585	0.108029	ATCG01010.1	1.14578	0.901977	0.970846	0.0513368	ATCG01010.1	0.450745	0.196495	0.673972	0.232886	ATCG01010.1	0.535471	0.304821	0.795799	0.157127	ATCG01010.1	1.23129	0.563378	0.876126	0.0814855	ATCG01010.1	0.972104	0.651695
plastid	AT3G25920.1	| ribosomal protein L15 | Chr3:9491268-9492558 REVERSE LENGTH=277 | 201606	4	4	4.917	29708.4	AT3G25920.1	8.40051	5.27886e-05	0.000808048	1	AT3G25920.1	8.18717	4.56449e-05	0.000518222	1	AT3G25920.1	5.85456	0.0112708	0.0631192	0.906053	AT3G25920.1	4.33455	0.000493034	0.00467462	0.999987	AT3G25920.1	1.82602	0.137696	0.553122	0.305794	AT3G25920.1	1.37178	0.106326	0.562576	0.364414	AT3G25920.1	1.12999	0.374242	0.8138	0.127596	AT3G25920.1	1.02606	0.734209	0.928141	0.0605672	AT3G25920.1	1.43487	0.174524
plastid	ATCG00770.1	| ribosomal protein S8 | ChrC:80068-80472 REVERSE LENGTH=134 | 201606	4	4	4.978	15480.5	ATCG00770.1	8.38213	5.20664e-05	0.000801822	1	ATCG00770.1	6.94472	7.59376e-06	0.000177025	1	ATCG00770.1	7.49325	8.48011e-05	0.00710322	1	ATCG00770.1	4.33196	9.52637e-06	0.000531532	1	ATCG00770.1	2.11569	0.0840061	0.46719	0.421161	ATCG00770.1	1.63305	0.00873033	0.194669	0.915317	ATCG00770.1	1.49012	0.00272486	0.44641	0.991184	ATCG00770.1	1.20698	0.291358	0.796387	0.165198	ATCG00770.1	1.11863	0.602424
plastid	AT3G15520.1;AT3G15520.3	| Cyclophilin-like peptidyl-prolyl cis-trans isomerase family protein | Chr3:5249739-5252432 REVERSE LENGTH=466 | 201606 [AT3G15520.1,AT3G15520.3]	9	9	9.962	50485.1	AT3G15520.1;AT3G15520.3	8.37965	9.34056e-05	0.0011329	1	AT3G15520.1;AT3G15520.3	7.80583	4.80476e-06	0.000130576	1	AT3G15520.1;AT3G15520.3	5.7295	0.000883923	0.0192413	0.999989	AT3G15520.1;AT3G15520.3	4.4186	2.98216e-05	0.000953164	1	AT3G15520.1;AT3G15520.3	1.74324	0.0191581	0.276975	0.783709	AT3G15520.1;AT3G15520.3	1.59783	0.00780015	0.184324	0.928375	AT3G15520.1;AT3G15520.3	1.09667	0.563707	0.865294	0.0807587	AT3G15520.1;AT3G15520.3	1.07351	0.747794	0.934926	0.0594626	AT3G15520.1;AT3G15520.3	1.46254	0.1275
plastid	AT4G18370.1	| DEGP protease 5 | Chr4:10149235-10151051 FORWARD LENGTH=323 | 201606	4	3	3.988	34924.2	AT4G18370.1	8.36321	6.70903e-05	0.000940318	1	AT4G18370.1	8.17023	6.74823e-05	0.000657354	1	AT4G18370.1	6.9477	0.00469379	0.0393627	0.984674	AT4G18370.1	4.92711	0.000198638	0.00272658	1	AT4G18370.1	1.69322	0.0291828	0.33056	0.688307	AT4G18370.1	1.27961	0.202329	0.67514	0.227328	AT4G18370.1	0.782884	0.30578	0.795943	0.156646	AT4G18370.1	1.02362	0.775452	0.94008	0.0574251	AT4G18370.1	1.20374	0.343464
nucleus	AT1G58025.1;AT1G58025.2;AT1G58025.3;AT1G58025.4;AT1G58025.5;AT1G58025.6	| DNA-binding bromodomain-containing protein | Chr1:21458219-21461757 REVERSE LENGTH=572 | 201606 [AT1G58025.1,AT1G58025.2,AT1G58025.3,AT1G58025.4,AT1G58025.5,AT1G58025.6]	2	2	1.968	64849.6	AT1G58025.1;AT1G58025.2;AT1G58025.3;AT1G58025.4;AT1G58025.5;AT1G58025.6	8.31252	0.00111652	0.00544023	0.999458	AT1G58025.1;AT1G58025.2;AT1G58025.3;AT1G58025.4;AT1G58025.5;AT1G58025.6	12.378	0.000177149	0.00122319	1	AT1G58025.1;AT1G58025.2;AT1G58025.3;AT1G58025.4;AT1G58025.5;AT1G58025.6	10.7121	0.00474257	0.0395266	0.984252	AT1G58025.1;AT1G58025.2;AT1G58025.3;AT1G58025.4;AT1G58025.5;AT1G58025.6	6.54569	0.000661956	0.00560045	0.999942	AT1G58025.1;AT1G58025.2;AT1G58025.3;AT1G58025.4;AT1G58025.5;AT1G58025.6	1.18985	0.770228	0.92446	0.0575955	AT1G58025.1;AT1G58025.2;AT1G58025.3;AT1G58025.4;AT1G58025.5;AT1G58025.6	1.13372	0.618923	0.905092	0.0725495	AT1G58025.1;AT1G58025.2;AT1G58025.3;AT1G58025.4;AT1G58025.5;AT1G58025.6	1.31929	0.330723	0.805287	0.144926	AT1G58025.1;AT1G58025.2;AT1G58025.3;AT1G58025.4;AT1G58025.5;AT1G58025.6	0.671557	0.0472937	0.605991	0.549857	AT1G58025.1;AT1G58025.2;AT1G58025.3;AT1G58025.4;AT1G58025.5;AT1G58025.6	0.775994	0.525099
plastid	AT2G26340.1	| hypothetical protein | Chr2:11215254-11216480 FORWARD LENGTH=253 | 201606	2	2	1.994	27824.8	AT2G26340.1	8.24588	0.000140205	0.00144527	1	AT2G26340.1	7.3175	8.66958e-06	0.000186797	1	AT2G26340.1	4.55382	0.00796191	0.0520733	0.949035	AT2G26340.1	3.62682	0.000117129	0.00203157	1	AT2G26340.1	1.8102	0.00166372	0.105989	0.99783	AT2G26340.1	1.41869	0.0160742	0.258509	0.818974	AT2G26340.1	1.36045	0.378494	0.814352	0.126083	AT2G26340.1	1.12687	0.618154	0.895113	0.0731751	AT2G26340.1	1.81076	0.0844101
plastid	AT4G01800.1;AT4G01800.3	| Albino or Glassy Yellow 1 | Chr4:770926-776131 REVERSE LENGTH=1022 | 201606 [AT4G01800.1,AT4G01800.3]	19	17	19.897	115187	AT4G01800.1;AT4G01800.3	8.24499	0.000896006	0.00467505	0.999775	AT4G01800.1;AT4G01800.3	7.06602	0.000434623	0.00223785	0.999994	AT4G01800.1;AT4G01800.3	7.58751	0.00055594	0.0151897	1	AT4G01800.1;AT4G01800.3	4.2014	9.36401e-05	0.00175601	1	AT4G01800.1;AT4G01800.3	1.45713	0.0422288	0.37957	0.596119	AT4G01800.1;AT4G01800.3	1.76105	0.040167	0.408258	0.608874	AT4G01800.1;AT4G01800.3	1.38863	0.174171	0.763824	0.256524	AT4G01800.1;AT4G01800.3	1.16685	0.68385	0.910834	0.0653013	AT4G01800.1;AT4G01800.3	1.08665	0.916626
plastid	AT1G49380.1	| cytochrome c biogenesis protein family | Chr1:18276794-18279204 FORWARD LENGTH=547 | 201606	3	2	2.9	59394.9	AT1G49380.1	8.19146	0.000281383	0.00220677	1	AT1G49380.1	7.29963	0.000334625	0.00185247	0.999999	AT1G49380.1	5.63466	0.00711887	0.0492889	0.959301	AT1G49380.1	3.67243	0.00518884	0.0216322	0.964056	AT1G49380.1	1.3058	0.535072	0.829581	0.0857639	AT1G49380.1	1.32674	0.249847	0.71314	0.189377	AT1G49380.1	0.949026	0.967504	0.988114	0.050146	AT1G49380.1	1.12218	0.0579058	0.637693	0.501244	AT1G49380.1	1.45376	0.0693377
plasma membrane	AT3G54600.1	| Class I glutamine amidotransferase-like superfamily protein | Chr3:20211048-20212876 FORWARD LENGTH=399 | 201606	2	2	1.989	43142.2	AT3G54600.1	8.17547	0.00514866	0.0159158	0.964574	AT3G54600.1	3.0753	0.00542073	0.0141273	0.961037	AT3G54600.1	1.13022	0.491151	0.621598	0.0911782	AT3G54600.1	4.16559	0.150107	0.249295	0.287226	AT3G54600.1	1.31501	0.769375	0.92446	0.0576544	AT3G54600.1	1.45915	0.195613	0.673972	0.233747	AT3G54600.1	1.49501	0.0745806	0.742917	0.450759	AT3G54600.1	2.65843	0.0519483	0.625484	0.527316	AT3G54600.1	7.23351	0.00550801
plastid	AT1G64510.1;AT1G64510.2	| Translation elongation factor EF1B/ribosomal protein S6 family protein | Chr1:23954993-23956205 REVERSE LENGTH=207 | 201606 [AT1G64510.1,AT1G64510.2]	7	7	10.798	22761.8	AT1G64510.1;AT1G64510.2	8.07211	5.27087e-06	0.000216968	1	AT1G64510.1;AT1G64510.2	8.36775	1.36432e-06	6.39134e-05	1	AT1G64510.1;AT1G64510.2	6.79795	7.32875e-05	0.00710322	1	AT1G64510.1;AT1G64510.2	4.37936	8.72374e-06	0.000527131	1	AT1G64510.1;AT1G64510.2	2.29777	0.00650017	0.185584	0.946487	AT1G64510.1;AT1G64510.2	2.0803	0.000502515	0.0562353	0.999986	AT1G64510.1;AT1G64510.2	1.30138	0.0347398	0.739622	0.645473	AT1G64510.1;AT1G64510.2	0.964669	0.524551	0.855418	0.0885307	AT1G64510.1;AT1G64510.2	1.18743	0.109125
plastid	AT5G64040.1	| photosystem I reaction center subunit PSI-N%2C chloroplast%2C putative / PSI-N%2C putative (PSAN) | Chr5:25628724-25629409 REVERSE LENGTH=171 | 201606	4	3	3.969	18429.1	AT5G64040.1	8.02657	0.366467	0.455962	0.130439	AT5G64040.1	0.531836	0.227397	0.295634	0.20585	AT5G64040.1	9.14142	0.395375	0.536524	0.115298	AT5G64040.1	17.4033	0.170984	0.274547	0.260245	AT5G64040.1	11.0495	0.0605602	0.428428	0.503585	AT5G64040.1	6.39483	0.0738876	0.493012	0.453102	AT5G64040.1	2.93114	0.123158	0.747071	0.330567	AT5G64040.1	15.0922	0.120406	0.71572	0.332009	AT5G64040.1	0.878044	0.941101
plastid	ATCG00830.1;ATCG01310.1	| ribosomal protein L2 | ChrC:84337-85843 REVERSE LENGTH=274 | 201606 [ATCG00830.1,ATCG01310.1]	4	4	3.988	29865.5	ATCG00830.1;ATCG01310.1	8.02575	9.08213e-05	0.00112849	1	ATCG00830.1;ATCG01310.1	7.9869	5.46186e-05	0.000577072	1	ATCG00830.1;ATCG01310.1	7.90252	0.000637838	0.016047	0.999999	ATCG00830.1;ATCG01310.1	5.46457	0.000448664	0.00439328	0.999992	ATCG00830.1;ATCG01310.1	2.23464	0.0578012	0.426337	0.515532	ATCG00830.1;ATCG01310.1	2.04134	0.0383715	0.398781	0.620474	ATCG00830.1;ATCG01310.1	1.93382	0.0871452	0.742917	0.41215	ATCG00830.1;ATCG01310.1	1.00486	0.980806	0.997232	0.0500523	ATCG00830.1;ATCG01310.1	1.01559	0.889815
plastid	AT1G71720.1	| Nucleic acid-binding proteins superfamily | Chr1:26983744-26985893 FORWARD LENGTH=500 | 201606	5	3	4.974	56327.7	AT1G71720.1	8.00685	0.00224505	0.0087428	0.99472	AT1G71720.1	5.45	0.00481642	0.0128623	0.968795	AT1G71720.1	5.91299	0.013648	0.0698381	0.874849	AT1G71720.1	3.64129	0.0141765	0.0433745	0.842261	AT1G71720.1	2.42214	0.0458392	0.387551	0.575117	AT1G71720.1	1.35896	0.764972	0.94951	0.0579624	AT1G71720.1	1.95522	0.114192	0.743909	0.347811	AT1G71720.1	1.46915	0.000205551	0.130551	0.999996	AT1G71720.1	1.35411	0.00318541
plastid	AT4G37200.1	| Thioredoxin superfamily protein | Chr4:17509836-17511230 REVERSE LENGTH=261 | 201606	6	4	5.97	28744.8	AT4G37200.1	8.00346	0.00254517	0.00956005	0.992601	AT4G37200.1	8.30862	8.40725e-06	0.000184162	1	AT4G37200.1	4.42818	0.0229104	0.0928476	0.765317	AT4G37200.1	4.15834	4.80709e-05	0.00122697	1	AT4G37200.1	1.9867	0.0226109	0.296922	0.747778	AT4G37200.1	2.09357	0.15793	0.640361	0.276547	AT4G37200.1	1.04361	0.879487	0.963554	0.0520282	AT4G37200.1	0.963272	0.670043	0.907033	0.066787	AT4G37200.1	1.8074	0.244163
plastid	AT2G34460.1	| NAD(P)-binding Rossmann-fold superfamily protein | Chr2:14529635-14530732 FORWARD LENGTH=280 | 201606	4	4	5.975	30471.4	AT2G34460.1	7.99183	1.077e-08	2.05347e-05	1	AT2G34460.1	6.56413	3.31516e-06	0.000103955	1	AT2G34460.1	4.56076	0.000235679	0.0108951	1	AT2G34460.1	2.86121	5.51432e-05	0.00130498	1	AT2G34460.1	1.56669	0.112214	0.512649	0.351849	AT2G34460.1	1.3472	0.00425527	0.139949	0.975615	AT2G34460.1	1.12161	0.0996996	0.742917	0.379631	AT2G34460.1	1.2175	0.0344275	0.566104	0.625218	AT2G34460.1	1.7523	0.0027267
plastid	AT3G04650.1	| FAD/NAD(P)-binding oxidoreductase family protein | Chr3:1262017-1264343 FORWARD LENGTH=486 | 201606	3	2	2.93	52364.5	AT3G04650.1	7.9894	3.56191e-05	0.000648804	1	AT3G04650.1	9.50757	1.02165e-06	5.46529e-05	1	AT3G04650.1	8.4827	0.00015728	0.00919771	1	AT3G04650.1	7.98105	6.47323e-07	0.000191772	1	AT3G04650.1	2.42301	0.0163664	0.266072	0.815496	AT3G04650.1	1.71663	0.000321015	0.0479823	0.999999	AT3G04650.1	1.59505	0.0597596	0.742917	0.506992	AT3G04650.1	0.84032	0.213587	0.778165	0.217528	AT3G04650.1	0.941846	0.76152
extracellular	AT2G18980.1	| Peroxidase superfamily protein | Chr2:8233419-8235294 REVERSE LENGTH=323 | 201606	6	5	5.982	35832.8	AT2G18980.1	7.98748	5.66513e-05	0.000849268	1	AT2G18980.1	7.43451	5.6586e-05	0.000589587	1	AT2G18980.1	7.15609	8.23897e-06	0.00251867	1	AT2G18980.1	3.7925	1.7301e-05	0.000681579	1	AT2G18980.1	1.62962	0.091562	0.47666	0.400102	AT2G18980.1	1.16681	0.152743	0.639189	0.283545	AT2G18980.1	1.0271	0.699738	0.903932	0.0633665	AT2G18980.1	1.07438	0.710875	0.921419	0.0626317	AT2G18980.1	1.11618	0.609623
plasma membrane	AT3G51420.1	| strictosidine synthase-like 4 | Chr3:19084082-19085451 FORWARD LENGTH=370 | 201606	2	1	1.994	41597.8	AT3G51420.1	7.93383	0.000195567	0.00173754	1	AT3G51420.1	6.58652	2.54995e-05	0.000365038	1	AT3G51420.1	7.88571	0.00129665	0.0224251	0.999891	AT3G51420.1	4.39438	0.000318168	0.00353042	0.999999	AT3G51420.1	1.69365	0.750379	0.914751	0.0590325	AT3G51420.1	1.66303	0.165276	0.64932	0.267155	AT3G51420.1	1.22946	0.788387	0.933442	0.0564018	AT3G51420.1	1.20455	0.362658	0.803914	0.133015	AT3G51420.1	1.0061	0.945956
plastid	AT5G01920.1;AT5G01920.2	| Protein kinase superfamily protein | Chr5:359154-360867 FORWARD LENGTH=495 | 201606 [AT5G01920.1,AT5G01920.2]	3	3	2.96	54981.3	AT5G01920.1;AT5G01920.2	7.90487	7.35333e-05	0.000993873	1	AT5G01920.1;AT5G01920.2	5.94676	2.99331e-06	0.000100884	1	AT5G01920.1;AT5G01920.2	5.4098	2.82819e-06	0.00251867	1	AT5G01920.1;AT5G01920.2	3.77415	0.000134384	0.0021612	1	AT5G01920.1;AT5G01920.2	3.01665	0.00067312	0.0777454	0.999937	AT5G01920.1;AT5G01920.2	2.45473	4.891e-05	0.0191201	1	AT5G01920.1;AT5G01920.2	2.01751	0.00478329	0.502514	0.969209	AT5G01920.1;AT5G01920.2	1.32927	0.148258	0.730531	0.288053	AT5G01920.1;AT5G01920.2	1.46121	0.0983391
cytosol	AT3G48720.1;AT5G63560.1	| HXXXD-type acyl-transferase family protein | Chr3:18046527-18049295 FORWARD LENGTH=430 | 201606	7	7	6.82	48005.6	AT3G48720.1;AT5G63560.1	7.90104	4.43185e-05	0.000735164	1	AT3G48720.1;AT5G63560.1	7.51857	1.9963e-05	0.000317088	1	AT3G48720.1;AT5G63560.1	3.37405	0.0153088	0.0743658	0.853583	AT3G48720.1;AT5G63560.1	2.72449	0.00266411	0.0141431	0.991675	AT3G48720.1;AT5G63560.1	1.51558	0.189173	0.608018	0.240203	AT3G48720.1;AT5G63560.1	1.18088	0.937069	0.989646	0.0505486	AT3G48720.1;AT5G63560.1	0.797888	0.282914	0.789232	0.168811	AT3G48720.1;AT5G63560.1	1.05087	0.722192	0.925446	0.0616035	AT3G48720.1;AT5G63560.1	2.34171	0.0141808
plastid	AT4G02530.1;AT4G02530.2	| chloroplast thylakoid lumen protein | Chr4:1112335-1114005 REVERSE LENGTH=216 | 201606 [AT4G02530.1,AT4G02530.2]	6	4	5.967	23663.9	AT4G02530.1;AT4G02530.2	7.89112	0.000159984	0.00156647	1	AT4G02530.1;AT4G02530.2	6.88177	4.96695e-07	3.60601e-05	1	AT4G02530.1;AT4G02530.2	5.84374	0.00184451	0.0255109	0.999394	AT4G02530.1;AT4G02530.2	3.52474	3.47702e-06	0.000327227	1	AT4G02530.1;AT4G02530.2	1.4887	0.0511782	0.4042	0.546804	AT4G02530.1;AT4G02530.2	1.38885	0.00362304	0.128311	0.98269	AT4G02530.1;AT4G02530.2	0.959258	0.636516	0.884989	0.0702864	AT4G02530.1;AT4G02530.2	1.14667	0.570914	0.878331	0.0802356	AT4G02530.1;AT4G02530.2	1.35035	0.299685
plastid	AT4G10000.1;AT4G10000.2	| Thioredoxin family protein | Chr4:6260707-6263053 REVERSE LENGTH=333 | 201606 [AT4G10000.1,AT4G10000.2]	2	2	1.994	37057	AT4G10000.1;AT4G10000.2	7.84735	6.19218e-05	0.000896543	1	AT4G10000.1;AT4G10000.2	5.4302	0.00022914	0.0014494	1	AT4G10000.1;AT4G10000.2	5.29215	7.46476e-06	0.00251867	1	AT4G10000.1;AT4G10000.2	3.70966	1.24267e-05	0.000597901	1	AT4G10000.1;AT4G10000.2	1.47844	0.108675	0.506219	0.3593	AT4G10000.1;AT4G10000.2	1.30479	0.19319	0.673972	0.236141	AT4G10000.1;AT4G10000.2	1.06589	0.740172	0.916912	0.059827	AT4G10000.1;AT4G10000.2	1.44513	0.112343	0.709634	0.347172	AT4G10000.1;AT4G10000.2	1.48283	0.0718158
plastid	AT3G54210.1	| Ribosomal protein L17 family protein | Chr3:20067672-20068385 REVERSE LENGTH=211 | 201606	4	4	3.979	23482.8	AT3G54210.1	7.8343	0.000105231	0.00121959	1	AT3G54210.1	6.21578	2.10303e-05	0.00032784	1	AT3G54210.1	4.18069	0.00149916	0.0232279	0.999771	AT3G54210.1	2.53686	0.00266706	0.0141431	0.991651	AT3G54210.1	1.43379	0.440773	0.783435	0.106878	AT3G54210.1	1.2687	0.227553	0.702786	0.205727	AT3G54210.1	0.956259	0.744241	0.919433	0.0595057	AT3G54210.1	1.26039	0.148208	0.730531	0.288123	AT3G54210.1	1.87392	0.0178843
plastid	ATCG00810.1	| ribosomal protein L22 | ChrC:83467-83949 REVERSE LENGTH=160 | 201606	3	3	3.964	18587.5	ATCG00810.1	7.8101	2.42455e-05	0.000524321	1	ATCG00810.1	8.02254	3.21454e-05	0.000427652	1	ATCG00810.1	7.32641	0.00302179	0.031615	0.995892	ATCG00810.1	5.08331	0.00020346	0.00275728	1	ATCG00810.1	2.12841	0.030372	0.333479	0.678625	ATCG00810.1	1.95103	0.00340054	0.124269	0.984987	ATCG00810.1	1.62656	0.0288866	0.722876	0.690766	ATCG00810.1	0.97352	0.792248	0.946013	0.0563207	ATCG00810.1	1.06602	0.58512
nucleus	AT1G31970.1	| DEA(D/H)-box RNA helicase family protein | Chr1:11479921-11482707 FORWARD LENGTH=537 | 201606	2	2	1.994	59604.1	AT1G31970.1	7.77106	0.166759	0.240076	0.265329	AT1G31970.1	8.98601	0.0136548	0.0286041	0.848878	AT1G31970.1	2.05843	0.977196	0.987019	0.0500657	AT1G31970.1	2.33673	0.23284	0.3466	0.20164	AT1G31970.1	3.11516	0.874382	0.958294	0.0522057	AT1G31970.1	1.04649	0.741074	0.940577	0.0597553	AT1G31970.1	2.57436	0.163366	0.763824	0.269542	AT1G31970.1	0.864796	0.435533	0.82511	0.109328	AT1G31970.1	3.77523	0.249902
plastid	AT1G71500.1	| Rieske (2Fe-2S) domain-containing protein | Chr1:26936084-26937331 FORWARD LENGTH=287 | 201606	7	7	6.979	31728.2	AT1G71500.1	7.76521	1.55566e-05	0.000395293	1	AT1G71500.1	6.86272	1.89676e-05	0.000308954	1	AT1G71500.1	5.20184	0.00166078	0.0246066	0.999624	AT1G71500.1	3.61578	0.000197548	0.00272658	1	AT1G71500.1	2.08567	0.029038	0.330137	0.689507	AT1G71500.1	1.67921	0.0125379	0.237753	0.863345	AT1G71500.1	1.22513	0.25469	0.787972	0.186113	AT1G71500.1	1.13151	0.0030264	0.335811	0.976317	AT1G71500.1	1.49278	0.0273978
plastid	AT4G39970.1	| Haloacid dehalogenase-like hydrolase (HAD) superfamily protein | Chr4:18536678-18538429 REVERSE LENGTH=316 | 201606	10	10	11.834	34656.3	AT4G39970.1	7.74243	2.24963e-06	0.000142908	1	AT4G39970.1	6.75141	2.30689e-07	2.5341e-05	1	AT4G39970.1	6.08381	0.00191391	0.0261098	0.999288	AT4G39970.1	3.90993	3.55613e-06	0.000328586	1	AT4G39970.1	1.56747	0.00358769	0.126615	0.983063	AT4G39970.1	1.64674	0.044138	0.424828	0.584811	AT4G39970.1	1.44587	0.00285932	0.44641	0.990055	AT4G39970.1	1.14679	0.140204	0.727088	0.299608	AT4G39970.1	1.27263	0.237379
plastid	AT5G04140.1;AT5G04140.2	| glutamate synthase 1 | Chr5:1130031-1138186 FORWARD LENGTH=1622 | 201606 [AT5G04140.1,AT5G04140.2]	60	50	73.411	176754	AT5G04140.1;AT5G04140.2	7.73908	2.86829e-05	0.000578438	1	AT5G04140.1;AT5G04140.2	7.49853	3.61117e-05	0.000454603	1	AT5G04140.1;AT5G04140.2	6.00688	0.00113628	0.0218072	0.999948	AT5G04140.1;AT5G04140.2	3.46243	0.000318151	0.00353042	0.999999	AT5G04140.1;AT5G04140.2	1.09831	0.736426	0.91185	0.0601284	AT5G04140.1;AT5G04140.2	1.12924	0.394736	0.798299	0.120564	AT5G04140.1;AT5G04140.2	0.967053	0.8558	0.956684	0.0529178	AT5G04140.1;AT5G04140.2	1.03208	0.574208	0.879576	0.0797005	AT5G04140.1;AT5G04140.2	1.28837	0.0792589
plastid	AT1G58290.1;AT2G31250.1	| Glutamyl-tRNA reductase family protein | Chr1:21624028-21626051 REVERSE LENGTH=543 | 201606	7	7	7.897	59515	AT1G58290.1;AT2G31250.1	7.73448	5.82561e-05	0.000865268	1	AT1G58290.1;AT2G31250.1	7.33224	8.27347e-06	0.000183606	1	AT1G58290.1;AT2G31250.1	9.27786	0.00291653	0.0312711	0.99636	AT1G58290.1;AT2G31250.1	7.16073	1.16604e-05	0.000577667	1	AT1G58290.1;AT2G31250.1	3.77974	0.00215835	0.110993	0.99527	AT1G58290.1;AT2G31250.1	3.49478	0.000241032	0.0425789	1	AT1G58290.1;AT2G31250.1	2.63445	0.0023636	0.44641	0.993922	AT1G58290.1;AT2G31250.1	1.05486	0.761487	0.939309	0.0584192	AT1G58290.1;AT2G31250.1	0.833649	0.739858
plastid	AT1G50320.1	| thioredoxin X | Chr1:18638606-18639464 REVERSE LENGTH=182 | 201606	4	2	5.898	19648.2	AT1G50320.1	7.71569	0.00223619	0.00872582	0.994777	AT1G50320.1	7.17287	0.0101748	0.0227389	0.895206	AT1G50320.1	3.94622	0.018777	0.0830576	0.811341	AT1G50320.1	2.60027	0.0134571	0.0417349	0.851409	AT1G50320.1	1.61892	0.124914	0.532559	0.32738	AT1G50320.1	1.67455	0.0721816	0.492385	0.458978	AT1G50320.1	1.23818	0.279402	0.789232	0.170816	AT1G50320.1	1.07568	0.727754	0.926282	0.0611168	AT1G50320.1	1.95521	0.0917629
plastid	AT1G15980.1	| NDH-dependent cyclic electron flow 1 | Chr1:5489314-5491199 FORWARD LENGTH=461 | 201606	8	8	8.959	51024.2	AT1G15980.1	7.71033	0.000138014	0.00142558	1	AT1G15980.1	6.26691	0.000214943	0.00138798	1	AT1G15980.1	4.88144	0.00252635	0.0293797	0.997823	AT1G15980.1	2.42178	0.0051132	0.0214047	0.96503	AT1G15980.1	0.92505	0.815431	0.939474	0.0548295	AT1G15980.1	0.651409	0.202919	0.675775	0.22678	AT1G15980.1	0.851993	0.593401	0.875228	0.0761248	AT1G15980.1	1.23032	0.00230382	0.333464	0.986021	AT1G15980.1	1.57952	0.000916166
cytosol	AT4G37980.1;AT4G37980.2;AT4G37990.1	| cinnamyl alcohol dehydrogenase 7 | Chr4:17852670-17854302 FORWARD LENGTH=357 | 201606 [AT4G37980.1,AT4G37980.2]	2	2	1.987	38246	AT4G37980.1;AT4G37980.2;AT4G37990.1	7.64628	0.000143682	0.00146796	1	AT4G37980.1;AT4G37980.2;AT4G37990.1	6.37602	1.66555e-05	0.000281207	1	AT4G37980.1;AT4G37980.2;AT4G37990.1	3.81228	0.000579575	0.0155461	1	AT4G37980.1;AT4G37980.2;AT4G37990.1	1.26667	0.255781	0.373851	0.18539	AT4G37980.1;AT4G37980.2;AT4G37990.1	1.06815	0.527227	0.824168	0.0872353	AT4G37980.1;AT4G37980.2;AT4G37990.1	0.735784	0.24865	0.712429	0.190199	AT4G37980.1;AT4G37980.2;AT4G37990.1	0.604065	0.174961	0.763824	0.255615	AT4G37980.1;AT4G37980.2;AT4G37990.1	1.19922	0.364242	0.803914	0.132416	AT4G37980.1;AT4G37980.2;AT4G37990.1	2.0057	0.0160819
extracellular	AT3G45010.1;AT5G22980.1	| serine carboxypeptidase-like 48 | Chr3:16466328-16468845 FORWARD LENGTH=510 | 201606	8	8	7.939	56896.9	AT3G45010.1;AT5G22980.1	7.62617	0.0241347	0.050872	0.733014	AT3G45010.1;AT5G22980.1	5.72877	0.156478	0.215741	0.278474	AT3G45010.1;AT5G22980.1	4.45615	0.0455036	0.139481	0.583091	AT3G45010.1;AT5G22980.1	1.33973	0.854721	0.897272	0.0529623	AT3G45010.1;AT5G22980.1	0.805807	0.513419	0.814865	0.0899375	AT3G45010.1;AT5G22980.1	0.67661	0.184828	0.666166	0.244738	AT3G45010.1;AT5G22980.1	0.821895	0.52953	0.852685	0.0867987	AT3G45010.1;AT5G22980.1	1.3312	0.5856	0.881605	0.0779013	AT3G45010.1;AT5G22980.1	1.71138	0.512644
plastid	AT3G01440.1	| PsbQ-like 1 | Chr3:168478-169407 FORWARD LENGTH=220 | 201606	4	3	3.985	24783	AT3G01440.1	7.52508	3.99964e-06	0.00019267	1	AT3G01440.1	6.82755	1.11469e-08	5.14987e-06	1	AT3G01440.1	4.42017	7.71473e-06	0.00251867	1	AT3G01440.1	2.52174	0.000128683	0.00211444	1	AT3G01440.1	1.20542	0.0864416	0.471203	0.414136	AT3G01440.1	1.10478	0.403201	0.801669	0.11784	AT3G01440.1	1.18531	0.0574563	0.742917	0.517068	AT3G01440.1	1.10216	0.311064	0.796387	0.155151	AT3G01440.1	1.70244	0.00333672
plastid	AT1G64770.1	| NDH-dependent cyclic electron flow 1 | Chr1:24057549-24059415 FORWARD LENGTH=348 | 201606	5	5	4.973	38006.4	AT1G64770.1	7.51898	0.000284113	0.00221791	1	AT1G64770.1	7.48224	0.000122643	0.000975386	1	AT1G64770.1	5.24364	0.0043725	0.038442	0.987334	AT1G64770.1	3.16269	0.00197368	0.0115379	0.996343	AT1G64770.1	1.15098	0.706542	0.898335	0.0627256	AT1G64770.1	1.08884	0.59055	0.894785	0.0765469	AT1G64770.1	0.962711	0.888553	0.963907	0.0517317	AT1G64770.1	1.00491	0.926052	0.984492	0.0507785	AT1G64770.1	1.43392	0.114088
plastid	AT5G22830.1;AT5G22830.2	| magnesium (Mg) transporter 10 | Chr5:7627676-7630633 FORWARD LENGTH=459 | 201606 [AT5G22830.1,AT5G22830.2]	4	4	3.981	51095.9	AT5G22830.1;AT5G22830.2	7.44587	0.00111976	0.00544555	0.999452	AT5G22830.1;AT5G22830.2	9.32159	0.00034703	0.0019066	0.999998	AT5G22830.1;AT5G22830.2	6.45947	0.00490841	0.0402981	0.982784	AT5G22830.1;AT5G22830.2	5.2407	0.00156381	0.00977405	0.998222	AT5G22830.1;AT5G22830.2	2.84881	0.291834	0.686412	0.163888	AT5G22830.1;AT5G22830.2	2.34976	0.0630827	0.479353	0.493156	AT5G22830.1;AT5G22830.2	2.0092	0.0359304	0.739908	0.637039	AT5G22830.1;AT5G22830.2	0.798777	0.109554	0.708197	0.35273	AT5G22830.1;AT5G22830.2	1.15271	0.508746
plastid	AT5G03880.1	| Thioredoxin family protein | Chr5:1038674-1041453 REVERSE LENGTH=339 | 201606	4	4	3.986	37040.8	AT5G03880.1	7.39872	1.33629e-06	0.000107012	1	AT5G03880.1	6.80844	1.16335e-06	5.91215e-05	1	AT5G03880.1	4.22533	0.00024604	0.0109682	1	AT5G03880.1	2.3759	0.00152055	0.00957411	0.998379	AT5G03880.1	1.45412	0.0759108	0.459216	0.44633	AT5G03880.1	1.58458	0.0764092	0.499071	0.444693	AT5G03880.1	1.08409	0.760244	0.924897	0.0583007	AT5G03880.1	1.0867	0.247461	0.780988	0.191782	AT5G03880.1	1.75104	0.00258785
cytosol	AT1G14820.1;AT1G14820.2;AT1G14820.3	| Sec14p-like phosphatidylinositol transfer family protein | Chr1:5105237-5106454 REVERSE LENGTH=239 | 201606 [AT1G14820.1,AT1G14820.2,AT1G14820.3]	2	2	1.994	26798.2	AT1G14820.1;AT1G14820.2;AT1G14820.3	7.36233	0.12879	0.193871	0.32054	AT1G14820.1;AT1G14820.2;AT1G14820.3	4.60749	0.116981	0.168988	0.342268	AT1G14820.1;AT1G14820.2;AT1G14820.3	2.33133	0.303668	0.451901	0.150788	AT1G14820.1;AT1G14820.2;AT1G14820.3	2.89324	0.229238	0.342641	0.204409	AT1G14820.1;AT1G14820.2;AT1G14820.3	0.354103	0.464186	0.790676	0.100867	AT1G14820.1;AT1G14820.2;AT1G14820.3	1.32643	0.38512	0.793077	0.123783	AT1G14820.1;AT1G14820.2;AT1G14820.3	1.48415	0.547708	0.860236	0.0834865	AT1G14820.1;AT1G14820.2;AT1G14820.3	1.5979	0.851792	0.962624	0.0531657	AT1G14820.1;AT1G14820.2;AT1G14820.3	3.158	0.288467
cytosol	AT4G24130.1	| DUF538 family protein (Protein of unknown function%2C DUF538) | Chr4:12527861-12528423 FORWARD LENGTH=157 | 201606	3	3	2.991	17954.6	AT4G24130.1	7.3462	0.000901539	0.00469428	0.999769	AT4G24130.1	9.27019	0.00117288	0.00455456	0.999348	AT4G24130.1	8.2959	0.00461061	0.0393627	0.985383	AT4G24130.1	9.41488	0.000517732	0.00478945	0.999983	AT4G24130.1	4.88879	0.00170157	0.105989	0.99767	AT4G24130.1	3.7772	0.00794311	0.184324	0.926368	AT4G24130.1	2.48003	0.0355338	0.739622	0.639821	AT4G24130.1	0.792455	0.355147	0.803914	0.135913	AT4G24130.1	0.885521	0.647115
plastid	AT3G26740.1	| CCR-like protein | Chr3:9827868-9828461 FORWARD LENGTH=141 | 201606	2	2	1.956	15314.4	AT3G26740.1	7.31663	0.0297789	0.0598641	0.683416	AT3G26740.1	7.46602	0.0037274	0.0105707	0.981575	AT3G26740.1	2.10918	0.0122187	0.0652361	0.893542	AT3G26740.1	2.04562	0.0403465	0.0932405	0.60774	AT3G26740.1	1.53607	0.559236	0.833975	0.0815041	AT3G26740.1	3.14629	0.135877	0.6206	0.308702	AT3G26740.1	2.68934	0.602914	0.876182	0.0747502	AT3G26740.1	0.97999	0.719606	0.925416	0.0618339	AT3G26740.1	3.46894	0.154104
peroxisome	AT1G68010.1;AT1G68010.2	| hydroxypyruvate reductase | Chr1:25493418-25495720 FORWARD LENGTH=386 | 201606 [AT1G68010.1,AT1G68010.2]	23	22	25.854	42248.5	AT1G68010.1;AT1G68010.2	7.31037	2.05701e-06	0.000138316	1	AT1G68010.1;AT1G68010.2	7.34505	5.60542e-07	3.79823e-05	1	AT1G68010.1;AT1G68010.2	5.65473	9.15271e-05	0.00710322	1	AT1G68010.1;AT1G68010.2	4.0657	5.3895e-06	0.000418341	1	AT1G68010.1;AT1G68010.2	1.65094	0.0794414	0.4627	0.43499	AT1G68010.1;AT1G68010.2	1.36933	0.0497824	0.443866	0.553916	AT1G68010.1;AT1G68010.2	1.06992	0.516818	0.84985	0.0892588	AT1G68010.1;AT1G68010.2	0.995278	0.91724	0.982562	0.0509761	AT1G68010.1;AT1G68010.2	1.29279	0.0536169
plastid	AT1G03600.1	| photosystem II family protein | Chr1:898916-899440 FORWARD LENGTH=174 | 201606	7	7	8.946	18835.5	AT1G03600.1	7.28941	9.84676e-06	0.000314725	1	AT1G03600.1	6.35944	2.81932e-06	9.74679e-05	1	AT1G03600.1	4.28106	0.00724858	0.0497801	0.957755	AT1G03600.1	3.2302	9.68473e-07	0.000196741	1	AT1G03600.1	1.59466	0.000544915	0.0713041	0.999978	AT1G03600.1	1.34366	0.00549666	0.155216	0.960039	AT1G03600.1	1.00273	0.943617	0.982868	0.0504401	AT1G03600.1	1.14624	0.265237	0.787478	0.180229	AT1G03600.1	1.70271	0.0656602
plastid	AT1G06690.1	| NAD(P)-linked oxidoreductase superfamily protein | Chr1:2049742-2052039 REVERSE LENGTH=377 | 201606	7	6	7.921	41498.2	AT1G06690.1	7.25055	0.000145683	0.00147373	1	AT1G06690.1	5.82094	2.53619e-06	9.33981e-05	1	AT1G06690.1	2.9899	0.183604	0.324096	0.236964	AT1G06690.1	3.49948	2.10857e-05	0.00076138	1	AT1G06690.1	2.18655	0.00122725	0.0946254	0.99923	AT1G06690.1	1.80301	0.0640406	0.48073	0.489312	AT1G06690.1	1.58366	0.0759802	0.742917	0.446101	AT1G06690.1	1.2456	0.302137	0.796387	0.159577	AT1G06690.1	2.42501	0.0734667
golgi	AT5G66030.1;AT5G66030.2;AT5G66030.3	| Golgi-localized GRIP domain-containing protein | Chr5:26405133-26409888 REVERSE LENGTH=788 | 201606 [AT5G66030.1,AT5G66030.2,AT5G66030.3]	11	11	10.874	89860.3	AT5G66030.1;AT5G66030.2;AT5G66030.3	7.2115	5.91197e-05	0.000868342	1	AT5G66030.1;AT5G66030.2;AT5G66030.3	7.45393	0.000124422	0.000986449	1	AT5G66030.1;AT5G66030.2;AT5G66030.3	4.74213	0.00103641	0.0210778	0.99997	AT5G66030.1;AT5G66030.2;AT5G66030.3	3.13167	0.000220867	0.00286524	1	AT5G66030.1;AT5G66030.2;AT5G66030.3	1.28379	0.0792697	0.4627	0.435528	AT5G66030.1;AT5G66030.2;AT5G66030.3	1.24832	0.53717	0.877216	0.085378	AT5G66030.1;AT5G66030.2;AT5G66030.3	1.06126	0.717662	0.90929	0.0617182	AT5G66030.1;AT5G66030.2;AT5G66030.3	0.967476	0.899905	0.977745	0.0514312	AT5G66030.1;AT5G66030.2;AT5G66030.3	1.52073	0.078668
plasma membrane	AT2G30740.1;AT2G30740.10;AT2G30740.11;AT2G30740.12;AT2G30740.13;AT2G30740.14;AT2G30740.15;AT2G30740.2;AT2G30740.3;AT2G30740.4;AT2G30740.5;AT2G30740.6;AT2G30740.7;AT2G30740.8;AT2G30740.9;AT2G30730.1;AT2G30730.2;AT3G62220.1;AT3G62220.3	| Protein kinase superfamily protein | Chr2:13096399-13098285 FORWARD LENGTH=366 | 201606 [AT2G30740.1,AT2G30740.10,AT2G30740.11,AT2G30740.12,AT2G30740.13,AT2G30740.14,AT2G30740.15,AT2G30740.2,AT2G30740.3,AT2G30740.4,AT2G30740.5,AT2G30740.6,AT2G30740.7,AT2G30740.8,AT2G30740.9]	9	6	8.877	40500	AT2G30740.1;AT2G30740.10;AT2G30740.11;AT2G30740.12;AT2G30740.13;AT2G30740.14;AT2G30740.15;AT2G30740.2;AT2G30740.3;AT2G30740.4;AT2G30740.5;AT2G30740.6;AT2G30740.7;AT2G30740.8;AT2G30740.9;AT2G30730.1;AT2G30730.2;AT3G62220.1;AT3G62220.3	7.18668	0.0353559	0.0680086	0.641078	AT2G30740.1;AT2G30740.10;AT2G30740.11;AT2G30740.12;AT2G30740.13;AT2G30740.14;AT2G30740.15;AT2G30740.2;AT2G30740.3;AT2G30740.4;AT2G30740.5;AT2G30740.6;AT2G30740.7;AT2G30740.8;AT2G30740.9;AT2G30730.1;AT2G30730.2;AT3G62220.1;AT3G62220.3	8.01789	0.000409135	0.00214574	0.999996	AT2G30740.1;AT2G30740.10;AT2G30740.11;AT2G30740.12;AT2G30740.13;AT2G30740.14;AT2G30740.15;AT2G30740.2;AT2G30740.3;AT2G30740.4;AT2G30740.5;AT2G30740.6;AT2G30740.7;AT2G30740.8;AT2G30740.9;AT2G30730.1;AT2G30730.2;AT3G62220.1;AT3G62220.3	6.01262	0.000450006	0.0139447	1	AT2G30740.1;AT2G30740.10;AT2G30740.11;AT2G30740.12;AT2G30740.13;AT2G30740.14;AT2G30740.15;AT2G30740.2;AT2G30740.3;AT2G30740.4;AT2G30740.5;AT2G30740.6;AT2G30740.7;AT2G30740.8;AT2G30740.9;AT2G30730.1;AT2G30730.2;AT3G62220.1;AT3G62220.3	2.45514	0.000846858	0.00667246	0.999823	AT2G30740.1;AT2G30740.10;AT2G30740.11;AT2G30740.12;AT2G30740.13;AT2G30740.14;AT2G30740.15;AT2G30740.2;AT2G30740.3;AT2G30740.4;AT2G30740.5;AT2G30740.6;AT2G30740.7;AT2G30740.8;AT2G30740.9;AT2G30730.1;AT2G30730.2;AT3G62220.1;AT3G62220.3	1.09993	0.141842	0.556972	0.299351	AT2G30740.1;AT2G30740.10;AT2G30740.11;AT2G30740.12;AT2G30740.13;AT2G30740.14;AT2G30740.15;AT2G30740.2;AT2G30740.3;AT2G30740.4;AT2G30740.5;AT2G30740.6;AT2G30740.7;AT2G30740.8;AT2G30740.9;AT2G30730.1;AT2G30730.2;AT3G62220.1;AT3G62220.3	1.25813	0.155781	0.639189	0.279409	AT2G30740.1;AT2G30740.10;AT2G30740.11;AT2G30740.12;AT2G30740.13;AT2G30740.14;AT2G30740.15;AT2G30740.2;AT2G30740.3;AT2G30740.4;AT2G30740.5;AT2G30740.6;AT2G30740.7;AT2G30740.8;AT2G30740.9;AT2G30730.1;AT2G30730.2;AT3G62220.1;AT3G62220.3	1.11509	0.468892	0.839276	0.0997269	AT2G30740.1;AT2G30740.10;AT2G30740.11;AT2G30740.12;AT2G30740.13;AT2G30740.14;AT2G30740.15;AT2G30740.2;AT2G30740.3;AT2G30740.4;AT2G30740.5;AT2G30740.6;AT2G30740.7;AT2G30740.8;AT2G30740.9;AT2G30730.1;AT2G30730.2;AT3G62220.1;AT3G62220.3	0.896331	0.503679	0.848569	0.0927761	AT2G30740.1;AT2G30740.10;AT2G30740.11;AT2G30740.12;AT2G30740.13;AT2G30740.14;AT2G30740.15;AT2G30740.2;AT2G30740.3;AT2G30740.4;AT2G30740.5;AT2G30740.6;AT2G30740.7;AT2G30740.8;AT2G30740.9;AT2G30730.1;AT2G30730.2;AT3G62220.1;AT3G62220.3	1.19527	0.849376
plastid	AT1G26090.1	| P-loop containing nucleoside triphosphate hydrolases superfamily protein | Chr1:9020509-9022619 FORWARD LENGTH=455 | 201606	2	2	1.994	49910.4	AT1G26090.1	7.14032	0.00298226	0.0107184	0.988975	AT1G26090.1	5.00357	0.000152112	0.00111414	1	AT1G26090.1	3.90151	0.00320881	0.0329105	0.994987	AT1G26090.1	2.7347	0.00226632	0.0125736	0.994581	AT1G26090.1	1.10164	0.915843	0.97436	0.0509834	AT1G26090.1	1.23759	0.401108	0.801295	0.118504	AT1G26090.1	1.13117	0.467881	0.839276	0.0999702	AT1G26090.1	1.42704	0.404157	0.814421	0.11863	AT1G26090.1	1.83014	0.186457
plastid	AT2G25840.1;AT2G25840.2;AT2G25840.3	| Nucleotidylyl transferase superfamily protein | Chr2:11021924-11025158 FORWARD LENGTH=408 | 201606 [AT2G25840.1,AT2G25840.2,AT2G25840.3]	5	5	4.914	45301.4	AT2G25840.1;AT2G25840.2;AT2G25840.3	7.09268	0.000305439	0.00230645	0.999999	AT2G25840.1;AT2G25840.2;AT2G25840.3	6.75489	8.7926e-05	0.000790366	1	AT2G25840.1;AT2G25840.2;AT2G25840.3	5.08937	0.0180515	0.0814415	0.81991	AT2G25840.1;AT2G25840.2;AT2G25840.3	3.51668	9.45131e-05	0.00176587	1	AT2G25840.1;AT2G25840.2;AT2G25840.3	1.98376	0.000573371	0.0713041	0.999972	AT2G25840.1;AT2G25840.2;AT2G25840.3	1.40447	0.0549884	0.458251	0.528341	AT2G25840.1;AT2G25840.2;AT2G25840.3	1.37834	0.142083	0.752368	0.298985	AT2G25840.1;AT2G25840.2;AT2G25840.3	1.05001	0.898087	0.977745	0.051484	AT2G25840.1;AT2G25840.2;AT2G25840.3	1.39363	0.319383
plastid	AT5G23060.1	| calcium sensing receptor | Chr5:7736760-7738412 REVERSE LENGTH=387 | 201606	17	17	18.715	41287.2	AT5G23060.1	7.07192	6.04518e-05	0.000882805	1	AT5G23060.1	5.67534	2.30041e-05	0.000343844	1	AT5G23060.1	4.10914	0.00169832	0.0247159	0.999583	AT5G23060.1	2.28458	0.0013889	0.00911935	0.998806	AT5G23060.1	1.06831	0.685666	0.888892	0.0647532	AT5G23060.1	1.19607	0.31413	0.75151	0.152557	AT5G23060.1	0.852881	0.347744	0.810716	0.13772	AT5G23060.1	1.24608	0.0671307	0.649697	0.465901	AT5G23060.1	1.72102	0.0161574
plastid	AT2G42530.1	| cold regulated 15b | Chr2:17709191-17709873 REVERSE LENGTH=141 | 201606	2	1	1.94	14960.9	AT2G42530.1	7.05027	0.654581	0.724245	0.0681225	AT2G42530.1	2.39935	0.222716	0.290664	0.209591	AT2G42530.1	2.46541	0.0248991	0.0978632	0.744841	AT2G42530.1	1.7874	0.0717744	0.141274	0.460403	AT2G42530.1	1.60357	0.184465	0.602863	0.245124	AT2G42530.1	1.25218	0.596331	0.895262	0.075696	AT2G42530.1	1.01053	0.907529	0.969736	0.0511887	AT2G42530.1	2.93841	0.886837	0.973482	0.051833	AT2G42530.1	2.85968	0.765696
plasma membrane	AT4G25960.1	| P-glycoprotein 2 | Chr4:13177438-13183425 FORWARD LENGTH=1273 | 201606	2	2	1.994	139915	AT4G25960.1	7.04381	0.000290782	0.00224405	0.999999	AT4G25960.1	4.89687	0.000309227	0.00177442	0.999999	AT4G25960.1	1.67156	0.553496	0.675196	0.0798983	AT4G25960.1	1.27082	0.30627	0.428071	0.156401	AT4G25960.1	1.25889	0.450397	0.7863	0.104337	AT4G25960.1	0.892807	0.704295	0.930518	0.0629351	AT4G25960.1	1.34533	0.31934	0.802443	0.150092	AT4G25960.1	1.43843	0.0168462	0.494837	0.779447	AT4G25960.1	4.21391	0.0138263
cytosol	AT5G05270.1;AT5G05270.2	| Chalcone-flavanone isomerase family protein | Chr5:1563492-1564827 FORWARD LENGTH=209 | 201606 [AT5G05270.1,AT5G05270.2]	9	9	10.914	23331.6	AT5G05270.1;AT5G05270.2	7.0333	0.00104457	0.00526117	0.999581	AT5G05270.1;AT5G05270.2	5.64411	0.000209024	0.00136537	1	AT5G05270.1;AT5G05270.2	4.62179	0.00447086	0.0389428	0.986542	AT5G05270.1;AT5G05270.2	4.16731	0.000481033	0.00458651	0.999989	AT5G05270.1;AT5G05270.2	2.40676	0.00773031	0.20344	0.929355	AT5G05270.1;AT5G05270.2	1.77809	0.0229511	0.317813	0.744427	AT5G05270.1;AT5G05270.2	1.19591	0.398414	0.818738	0.119368	AT5G05270.1;AT5G05270.2	1.24613	0.425062	0.823526	0.112299	AT5G05270.1;AT5G05270.2	1.52177	0.19915
golgi,endoplasmic reticulum	AT4G08810.1	| calcium ion binding protein | Chr4:5616204-5617862 REVERSE LENGTH=552 | 201606	3	3	2.875	64193.3	AT4G08810.1	6.97492	0.000799758	0.00433764	0.999862	AT4G08810.1	7.99903	0.000364791	0.00197679	0.999998	AT4G08810.1	4.85876	0.0183169	0.0821412	0.816758	AT4G08810.1	1.74035	0.0506822	0.109603	0.549309	AT4G08810.1	0.791598	0.47144	0.792019	0.0991185	AT4G08810.1	0.740005	0.429841	0.814522	0.10989	AT4G08810.1	0.383156	0.137487	0.751498	0.306125	AT4G08810.1	0.871971	0.30636	0.796387	0.157458	AT4G08810.1	1.43553	0.189291
extracellular	AT4G27020.1	| inositol-1%2C4%2C5-trisphosphate 5-phosphatase | Chr4:13568604-13571381 REVERSE LENGTH=523 | 201606	3	2	3.844	59683.3	AT4G27020.1	6.95957	0.161476	0.234061	0.271941	AT4G27020.1	1.33275	0.215055	0.281677	0.21597	AT4G27020.1	0.802154	0.38491	0.527966	0.118599	AT4G27020.1	1.01107	0.994905	0.995493	0.0500036	AT4G27020.1	0.946142	0.667284	0.882311	0.0666932	AT4G27020.1	1.21582	0.683077	0.925865	0.0650176	AT4G27020.1	1.10947	0.731853	0.915177	0.0605034	AT4G27020.1	5.22194	0.170891	0.746579	0.259541	AT4G27020.1	8.6761	0.115268
plastid	AT5G42270.1	| FtsH extracellular protease family | Chr5:16902659-16905102 FORWARD LENGTH=704 | 201606	27	8	33.714	75233.1	AT5G42270.1	6.95144	3.07201e-07	5.20398e-05	1	AT5G42270.1	6.24819	4.54729e-08	1.10044e-05	1	AT5G42270.1	6.1411	0.00040116	0.0133534	1	AT5G42270.1	4.08784	1.04526e-06	0.000196741	1	AT5G42270.1	1.86724	0.00531739	0.167814	0.962389	AT5G42270.1	1.70588	0.000657078	0.0582119	0.999944	AT5G42270.1	1.38267	0.0285742	0.722876	0.69338	AT5G42270.1	1.11255	0.0413473	0.595003	0.581987	AT5G42270.1	1.13195	0.345982
golgi	AT3G59040.1;AT3G59040.2	| Tetratricopeptide repeat (TPR)-like superfamily protein | Chr3:21821495-21824233 REVERSE LENGTH=583 | 201606 [AT3G59040.1,AT3G59040.2]	4	4	3.932	66163.4	AT3G59040.1;AT3G59040.2	6.93974	0.00021731	0.00185216	1	AT3G59040.1;AT3G59040.2	9.42744	0.000184962	0.00126002	1	AT3G59040.1;AT3G59040.2	17.1518	5.68375e-05	0.00656473	1	AT3G59040.1;AT3G59040.2	13.5942	0.000175096	0.00249254	1	AT3G59040.1;AT3G59040.2	8.28923	0.0882789	0.473037	0.40899	AT3G59040.1;AT3G59040.2	4.24932	0.0111418	0.219467	0.881981	AT3G59040.1;AT3G59040.2	2.70126	0.00181076	0.44641	0.997175	AT3G59040.1;AT3G59040.2	0.736122	0.20805	0.774118	0.222292	AT3G59040.1;AT3G59040.2	0.404607	0.0025013
plastid	AT1G07320.1	| ribosomal protein L4 | Chr1:2249190-2250189 FORWARD LENGTH=282 | 201606	11	11	11.876	30559.7	AT1G07320.1	6.92782	4.78756e-06	0.000211201	1	AT1G07320.1	5.81615	0.000162388	0.00115744	1	AT1G07320.1	6.08039	4.69087e-06	0.00251867	1	AT1G07320.1	4.24511	3.19562e-06	0.000306418	1	AT1G07320.1	2.5352	0.00316175	0.121727	0.98732	AT1G07320.1	2.02461	0.00522984	0.152423	0.963526	AT1G07320.1	1.27782	0.105629	0.742917	0.36596	AT1G07320.1	1.19113	0.269106	0.792024	0.177865	AT1G07320.1	1.13937	0.233026
plastid	AT2G24820.1	| translocon at the inner envelope membrane of chloroplasts 55-II | Chr2:10575038-10576829 FORWARD LENGTH=539 | 201606	3	3	2.926	60608.4	AT2G24820.1	6.90612	0.000491037	0.00314685	0.999988	AT2G24820.1	5.76625	0.0339586	0.0600271	0.65114	AT2G24820.1	6.30379	0.00288904	0.0311061	0.996477	AT2G24820.1	3.96971	0.000246595	0.0030791	1	AT2G24820.1	1.54274	0.298579	0.692179	0.160319	AT2G24820.1	1.60075	0.0386003	0.399525	0.618969	AT2G24820.1	1.26391	0.690646	0.898921	0.064253	AT2G24820.1	1.19768	0.475855	0.842388	0.0989994	AT2G24820.1	1.09555	0.721234
plastid	AT5G02940.1;AT5G02940.2	| ion channel POLLUX-like protein%2C putative (DUF1012) | Chr5:684671-689674 REVERSE LENGTH=813 | 201606 [AT5G02940.1,AT5G02940.2]	7	7	6.96	92142.3	AT5G02940.1;AT5G02940.2	6.89573	0.0017147	0.00734129	0.997613	AT5G02940.1;AT5G02940.2	10.7524	0.000173761	0.00120635	1	AT5G02940.1;AT5G02940.2	3.74971	0.0103895	0.0603571	0.917692	AT5G02940.1;AT5G02940.2	2.76315	0.0510632	0.11006	0.547383	AT5G02940.1;AT5G02940.2	1.73404	0.302194	0.692285	0.158458	AT5G02940.1;AT5G02940.2	2.19142	0.20919	0.684548	0.22108	AT5G02940.1;AT5G02940.2	1.39964	0.922653	0.977673	0.05083	AT5G02940.1;AT5G02940.2	0.641322	0.0354581	0.569902	0.618316	AT5G02940.1;AT5G02940.2	1.839	0.0545588
plastid	AT3G01480.1	| cyclophilin 38 | Chr3:188569-190674 FORWARD LENGTH=437 | 201606	15	15	19.892	47982.6	AT3G01480.1	6.87968	0.000479692	0.00309365	0.999989	AT3G01480.1	6.97658	4.35036e-06	0.000123869	1	AT3G01480.1	5.2238	0.00143225	0.0230673	0.999817	AT3G01480.1	3.04768	0.000133978	0.0021612	1	AT3G01480.1	1.48413	0.193415	0.611323	0.235916	AT3G01480.1	1.28774	0.138003	0.624165	0.305308	AT3G01480.1	1.54268	0.272313	0.789232	0.174985	AT3G01480.1	0.98611	0.756135	0.937325	0.0588188	AT3G01480.1	1.31699	0.378927
plastid	ATCG00540.1	| photosynthetic electron transfer A | ChrC:61657-62619 FORWARD LENGTH=320 | 201606	18	18	20.801	35358	ATCG00540.1	6.86824	2.08808e-06	0.000138316	1	ATCG00540.1	5.84687	1.11914e-06	5.80355e-05	1	ATCG00540.1	4.43991	0.00265605	0.0297313	0.997384	ATCG00540.1	2.70295	3.69383e-05	0.00107885	1	ATCG00540.1	1.27093	0.0892016	0.473037	0.406453	ATCG00540.1	1.27189	0.017324	0.273418	0.804304	ATCG00540.1	1.02908	0.697778	0.902723	0.0635547	ATCG00540.1	1.17469	0.0108857	0.44949	0.855216	ATCG00540.1	1.54693	0.0460606
plastid	AT2G42540.1;AT2G42540.2;AT2G42540.4	| cold-regulated 15a | Chr2:17711241-17711930 REVERSE LENGTH=127 | 201606 [AT2G42540.1,AT2G42540.2,AT2G42540.4]	3	1	2.93	13452.1	AT2G42540.1;AT2G42540.2;AT2G42540.4	6.83694	0.39615	0.486523	0.120102	AT2G42540.1;AT2G42540.2;AT2G42540.4	8.31464	0.0072974	0.0175428	0.935419	AT2G42540.1;AT2G42540.2;AT2G42540.4	0.395452	0.0522104	0.150843	0.544856	AT2G42540.1;AT2G42540.2;AT2G42540.4	1.29298	0.696294	0.77822	0.0636982	AT2G42540.1;AT2G42540.2;AT2G42540.4	1.77485	0.709077	0.899571	0.0624915	AT2G42540.1;AT2G42540.2;AT2G42540.4	0.690312	0.274136	0.729403	0.173897	AT2G42540.1;AT2G42540.2;AT2G42540.4	0.742455	0.439484	0.835256	0.107226	AT2G42540.1;AT2G42540.2;AT2G42540.4	0.822277	0.371919	0.803914	0.129573	AT2G42540.1;AT2G42540.2;AT2G42540.4	17.2889	0.143137
extracellular	AT2G01890.1;AT2G01890.2;AT2G01890.3	| purple acid phosphatase 8 | Chr2:396985-399168 REVERSE LENGTH=335 | 201606 [AT2G01890.1,AT2G01890.2,AT2G01890.3]	3	2	2.96	38173.9	AT2G01890.1;AT2G01890.2;AT2G01890.3	6.81443	0.000524867	0.00331351	0.999982	AT2G01890.1;AT2G01890.2;AT2G01890.3	5.5291	0.0175577	0.0351155	0.801618	AT2G01890.1;AT2G01890.2;AT2G01890.3	5.45327	0.0104475	0.0603974	0.916927	AT2G01890.1;AT2G01890.2;AT2G01890.3	7.98962	0.0326275	0.0795649	0.661053	AT2G01890.1;AT2G01890.2;AT2G01890.3	3.57374	0.00230604	0.110993	0.994316	AT2G01890.1;AT2G01890.2;AT2G01890.3	3.48737	0.02481	0.333557	0.72667	AT2G01890.1;AT2G01890.2;AT2G01890.3	2.00701	0.0567263	0.742917	0.520349	AT2G01890.1;AT2G01890.2;AT2G01890.3	1.23247	0.368004	0.803914	0.13101	AT2G01890.1;AT2G01890.2;AT2G01890.3	1.24961	0.391981
plastid	AT4G34120.1	| Cystathionine beta-synthase (CBS) family protein | Chr4:16341194-16342893 FORWARD LENGTH=238 | 201606	7	7	6.978	25956.4	AT4G34120.1	6.81371	9.73819e-05	0.00116013	1	AT4G34120.1	6.27181	2.17073e-05	0.000330194	1	AT4G34120.1	5.61486	0.0045072	0.0389551	0.986245	AT4G34120.1	3.96675	8.15426e-05	0.00162141	1	AT4G34120.1	1.66726	0.0275283	0.320135	0.702293	AT4G34120.1	1.38781	0.0388392	0.40118	0.617407	AT4G34120.1	0.757893	0.0834864	0.742917	0.422691	AT4G34120.1	1.0864	0.559473	0.874596	0.0821476	AT4G34120.1	1.21351	0.376754
plastid	AT5G03650.1	| starch branching enzyme 2.2 | Chr5:931924-937470 FORWARD LENGTH=805 | 201606	9	8	9.934	92594.8	AT5G03650.1	6.8121	0.000115158	0.00128314	1	AT5G03650.1	5.71138	3.697e-05	0.000461626	1	AT5G03650.1	3.47063	0.0167603	0.0781429	0.835519	AT5G03650.1	2.62042	0.000685755	0.00573192	0.999932	AT5G03650.1	1.89823	0.0869439	0.471203	0.412717	AT5G03650.1	1.44985	0.10655	0.562576	0.363921	AT5G03650.1	1.26841	0.410551	0.822372	0.115555	AT5G03650.1	1.19273	0.248837	0.780988	0.190845	AT5G03650.1	1.96279	0.0414892
plastid	AT3G24190.1	| Protein kinase superfamily protein | Chr3:8743319-8747703 FORWARD LENGTH=793 | 201606	8	8	7.879	87438.9	AT3G24190.1	6.80784	0.00220196	0.0086412	0.994997	AT3G24190.1	6.55541	6.17721e-07	4.02469e-05	1	AT3G24190.1	7.64192	0.000202607	0.0105066	1	AT3G24190.1	5.11601	4.36109e-05	0.00117063	1	AT3G24190.1	2.10287	0.0119775	0.228834	0.870755	AT3G24190.1	2.13746	0.00729867	0.178326	0.935401	AT3G24190.1	1.42702	0.0945044	0.742917	0.392455	AT3G24190.1	1.03851	0.863836	0.966243	0.0526653	AT3G24190.1	0.890855	0.616123
plastid	AT1G55480.1	| protein containing PDZ domain%2C a K-box domain%2C and a TPR region | Chr1:20713822-20715351 FORWARD LENGTH=335 | 201606	14	14	16.725	37411.9	AT1G55480.1	6.79593	1.03318e-05	0.000319128	1	AT1G55480.1	5.49588	2.32693e-05	0.000344766	1	AT1G55480.1	4.93965	0.00590273	0.0451448	0.973006	AT1G55480.1	3.39504	0.000124594	0.00208969	1	AT1G55480.1	1.39651	0.215375	0.628415	0.215696	AT1G55480.1	1.47603	0.0751553	0.49667	0.448834	AT1G55480.1	1.16532	0.612323	0.879295	0.07344	AT1G55480.1	1.23655	0.00863774	0.44035	0.888176	AT1G55480.1	1.37579	0.147158
plastid	AT1G60950.1	| 2Fe-2S ferredoxin-like superfamily protein | Chr1:22444565-22445011 FORWARD LENGTH=148 | 201606	2	2	1.994	15539.3	AT1G60950.1	6.79421	0.0284704	0.0579496	0.694254	AT1G60950.1	4.47137	0.0421603	0.0718747	0.596534	AT1G60950.1	3.37089	0.132879	0.266194	0.304906	AT1G60950.1	2.25073	0.11331	0.200292	0.349602	AT1G60950.1	1.72572	0.271603	0.673228	0.175413	AT1G60950.1	1.13663	0.770322	0.951155	0.057589	AT1G60950.1	2.89744	0.108576	0.742917	0.359513	AT1G60950.1	1.51949	0.356885	0.803914	0.135234	AT1G60950.1	2.01555	0.180496
plastid	AT5G22510.1;AT5G22510.2	| alkaline/neutral invertase | Chr5:7474974-7477479 REVERSE LENGTH=617 | 201606 [AT5G22510.1,AT5G22510.2]	8	5	7.915	69242.4	AT5G22510.1;AT5G22510.2	6.7402	8.46428e-05	0.001089	1	AT5G22510.1;AT5G22510.2	7.25569	3.4899e-05	0.00044787	1	AT5G22510.1;AT5G22510.2	5.76092	0.00265454	0.0297313	0.997389	AT5G22510.1;AT5G22510.2	3.39392	0.000495161	0.00468241	0.999987	AT5G22510.1;AT5G22510.2	2.05608	0.0079422	0.203955	0.926381	AT5G22510.1;AT5G22510.2	2.32204	0.00204993	0.100639	0.995916	AT5G22510.1;AT5G22510.2	2.01191	0.033742	0.739622	0.652731	AT5G22510.1;AT5G22510.2	0.928954	0.351578	0.803914	0.137326	AT5G22510.1;AT5G22510.2	1.16999	0.372408
plastid	ATCG01120.1	| chloroplast ribosomal protein S15 | ChrC:123296-123562 REVERSE LENGTH=88 | 201606	4	4	3.976	10719.3	ATCG01120.1	6.70204	1.05023e-05	0.000319128	1	ATCG01120.1	6.59236	8.55837e-06	0.000186668	1	ATCG01120.1	6.78458	0.000445887	0.0139447	1	ATCG01120.1	3.2508	0.000152417	0.0023122	1	ATCG01120.1	1.43691	0.0592968	0.42733	0.508983	ATCG01120.1	1.37671	0.0596584	0.4686	0.507426	ATCG01120.1	1.36192	0.572208	0.870494	0.079377	ATCG01120.1	1.01664	0.883493	0.973256	0.0519441	ATCG01120.1	0.987834	0.967451
plastid	AT1G52510.1	| alpha/beta-Hydrolases superfamily protein | Chr1:19563039-19565260 REVERSE LENGTH=380 | 201606	7	7	8.911	41840.8	AT1G52510.1	6.70199	3.6847e-06	0.000190179	1	AT1G52510.1	6.30296	2.70377e-07	2.74811e-05	1	AT1G52510.1	4.92535	0.000489921	0.0143344	1	AT1G52510.1	2.29101	2.11964e-06	0.000259079	1	AT1G52510.1	1.14869	0.165168	0.590827	0.267289	AT1G52510.1	1.1187	0.347529	0.768691	0.137807	AT1G52510.1	0.827064	0.0178803	0.642303	0.797941	AT1G52510.1	1.06331	0.495204	0.845916	0.0946005	AT1G52510.1	1.36071	0.0813584
plastid	AT3G28220.1	| TRAF-like family protein | Chr3:10524420-10526497 FORWARD LENGTH=370 | 201606	3	3	2.983	42888.3	AT3G28220.1	6.69295	0.0181368	0.0405977	0.795042	AT3G28220.1	4.47493	0.0607341	0.0978912	0.502851	AT3G28220.1	1.21743	0.344464	0.490618	0.133001	AT3G28220.1	0.90171	0.584329	0.684704	0.0774841	AT3G28220.1	1.31393	0.686126	0.88906	0.0647066	AT3G28220.1	1.11774	0.650556	0.912066	0.0685911	AT3G28220.1	1.34766	0.081907	0.742917	0.427409	AT3G28220.1	1.49566	0.431097	0.824494	0.110571	AT3G28220.1	5.49762	0.0285106
plastid	AT5G64860.1	| disproportionating enzyme | Chr5:25925373-25928788 REVERSE LENGTH=576 | 201606	8	8	7.891	64414.2	AT5G64860.1	6.68331	3.13541e-05	0.000604382	1	AT5G64860.1	5.59108	5.96679e-05	0.000606086	1	AT5G64860.1	5.05721	0.00154724	0.0236839	0.999732	AT5G64860.1	2.29947	0.0114321	0.0371708	0.878059	AT5G64860.1	1.41903	0.0691428	0.446144	0.469838	AT5G64860.1	1.92014	0.0602581	0.471658	0.504865	AT5G64860.1	1.62206	0.0377397	0.742917	0.624671	AT5G64860.1	1.19535	0.245875	0.780988	0.192872	AT5G64860.1	1.32154	0.186736
plastid	AT1G76080.1	| chloroplastic drought-induced stress protein of 32 kD | Chr1:28548063-28549348 REVERSE LENGTH=302 | 201606	11	9	10.882	33685	AT1G76080.1	6.66798	0.00229045	0.00887199	0.994421	AT1G76080.1	6.53281	0.00241232	0.00766229	0.993579	AT1G76080.1	7.16064	0.00801352	0.0522112	0.948392	AT1G76080.1	3.80243	0.00869554	0.0310765	0.915805	AT1G76080.1	1.41843	0.248121	0.65368	0.190565	AT1G76080.1	1.12107	0.449721	0.82711	0.104512	AT1G76080.1	0.692986	0.62615	0.882796	0.0716007	AT1G76080.1	1.02069	0.623126	0.896813	0.0725045	AT1G76080.1	0.931199	0.312841
plastid	AT1G14030.1	| Rubisco methyltransferase family protein | Chr1:4805493-4807440 REVERSE LENGTH=482 | 201606	7	6	7.866	54614.3	AT1G14030.1	6.64055	1.21622e-06	0.000103014	1	AT1G14030.1	6.20009	1.854e-07	2.24335e-05	1	AT1G14030.1	5.42352	0.000137768	0.00890255	1	AT1G14030.1	3.70191	1.07452e-05	0.00055571	1	AT1G14030.1	1.54221	0.109254	0.507058	0.35806	AT1G14030.1	1.40323	0.0139698	0.249066	0.844872	AT1G14030.1	1.13215	0.10119	0.742917	0.376102	AT1G14030.1	1.07104	0.248156	0.780988	0.191308	AT1G14030.1	1.2244	0.103559
cytosol	AT3G16520.1	| UDP-glucosyl transferase 88A1 | Chr3:5618807-5620833 REVERSE LENGTH=451 | 201606	5	4	4.849	50001.4	AT3G16520.1	6.62941	0.40717	0.497293	0.116597	AT3G16520.1	4.9827	0.00296283	0.00888849	0.989148	AT3G16520.1	11.9416	0.00427452	0.038044	0.988102	AT3G16520.1	4.70251	0.00789707	0.0291737	0.927015	AT3G16520.1	3.1719	0.0473469	0.391884	0.566808	AT3G16520.1	3.48389	0.0565949	0.460922	0.520945	AT3G16520.1	1.50719	0.780133	0.93068	0.0569303	AT3G16520.1	1.33049	0.547858	0.869602	0.0841764	AT3G16520.1	0.555151	0.276462
nucleus	AT2G16940.3	| Splicing factor%2C CC1-like protein | Chr2:7342869-7347052 REVERSE LENGTH=599 | 201606	3	3	2.973	67364.4	AT2G16940.3	6.62699	0.0021757	0.00860298	0.995162	AT2G16940.3	5.6201	0.00341138	0.00987842	0.984878	AT2G16940.3	7.31712	0.0118827	0.0643796	0.89797	AT2G16940.3	5.31928	0.0170901	0.0498362	0.807009	AT2G16940.3	5.5359	0.01171	0.2282	0.874326	AT2G16940.3	5.47943	0.140382	0.624165	0.301592	AT2G16940.3	5.57484	0.119611	0.747071	0.337192	AT2G16940.3	1.17916	0.0806701	0.671611	0.422541	AT2G16940.3	0.905683	0.813698
plasma membrane	AT3G08510.1;AT3G08510.2;AT3G55940.1	| phospholipase C 2 | Chr3:2582626-2585556 REVERSE LENGTH=581 | 201606 [AT3G08510.1,AT3G08510.2]	11	10	11.954	66124	AT3G08510.1;AT3G08510.2;AT3G55940.1	6.60572	0.334175	0.423828	0.143416	AT3G08510.1;AT3G08510.2;AT3G55940.1	1.33434	0.0903762	0.135925	0.403268	AT3G08510.1;AT3G08510.2;AT3G55940.1	1.07911	0.597704	0.713538	0.0734349	AT3G08510.1;AT3G08510.2;AT3G55940.1	0.935212	0.318463	0.438965	0.150502	AT3G08510.1;AT3G08510.2;AT3G55940.1	0.974139	0.779304	0.928652	0.0569847	AT3G08510.1;AT3G08510.2;AT3G55940.1	0.905579	0.438659	0.818453	0.107449	AT3G08510.1;AT3G08510.2;AT3G55940.1	1.01642	0.814789	0.943786	0.054864	AT3G08510.1;AT3G08510.2;AT3G55940.1	4.95055	0.410553	0.816446	0.116634	AT3G08510.1;AT3G08510.2;AT3G55940.1	6.12143	0.369081
plastid	AT4G27700.1	| Rhodanese/Cell cycle control phosphatase superfamily protein | Chr4:13826541-13827673 REVERSE LENGTH=224 | 201606	4	4	3.988	24873	AT4G27700.1	6.60298	0.000358403	0.00256536	0.999998	AT4G27700.1	5.47648	0.000389586	0.00207752	0.999997	AT4G27700.1	4.36338	0.00774813	0.0512797	0.951683	AT4G27700.1	2.4399	0.00542226	0.0223125	0.961017	AT4G27700.1	2.61859	0.0255723	0.30869	0.719649	AT4G27700.1	1.37779	0.229051	0.705048	0.204555	AT4G27700.1	1.42584	0.228826	0.777264	0.204731	AT4G27700.1	1.2057	0.151611	0.735746	0.28348	AT4G27700.1	1.51327	0.0710747
plastid	AT4G09010.1;AT4G09010.2;AT4G09010.3	| ascorbate peroxidase 4 | Chr4:5777502-5779338 REVERSE LENGTH=349 | 201606 [AT4G09010.1,AT4G09010.2,AT4G09010.3]	11	11	14.844	37935.2	AT4G09010.1;AT4G09010.2;AT4G09010.3	6.6003	5.83996e-05	0.000865268	1	AT4G09010.1;AT4G09010.2;AT4G09010.3	6.03056	5.14675e-05	0.000556281	1	AT4G09010.1;AT4G09010.2;AT4G09010.3	4.80097	0.0103593	0.0603571	0.918089	AT4G09010.1;AT4G09010.2;AT4G09010.3	3.48978	0.000272428	0.00319741	1	AT4G09010.1;AT4G09010.2;AT4G09010.3	1.51847	0.0989756	0.48458	0.381369	AT4G09010.1;AT4G09010.2;AT4G09010.3	1.27099	0.155711	0.639189	0.279502	AT4G09010.1;AT4G09010.2;AT4G09010.3	0.848827	0.394732	0.818738	0.120565	AT4G09010.1;AT4G09010.2;AT4G09010.3	1.09447	0.267678	0.792024	0.178732	AT4G09010.1;AT4G09010.2;AT4G09010.3	1.37479	0.186088
cytosol	AT1G04350.1	| 2-oxoglutarate (2OG) and Fe(II)-dependent oxygenase superfamily protein | Chr1:1165296-1166538 FORWARD LENGTH=360 | 201606	4	4	3.858	40798	AT1G04350.1	6.57325	0.00995676	0.0256838	0.898218	AT1G04350.1	10.2488	0.00460204	0.0124336	0.971451	AT1G04350.1	7.62531	0.0312747	0.112412	0.68584	AT1G04350.1	4.85398	0.0183587	0.0525036	0.792551	AT1G04350.1	2.09151	0.253582	0.657283	0.186851	AT1G04350.1	1.11877	0.519487	0.866438	0.0887319	AT1G04350.1	1.37074	0.468728	0.839276	0.0997663	AT1G04350.1	0.641367	0.0226492	0.525516	0.719258	AT1G04350.1	0.862032	0.771793
plastid	AT1G67700.1;AT1G67700.2;AT1G67700.3;AT1G67700.4;AT1G67700.5	| multidrug resistance protein | Chr1:25374295-25375716 FORWARD LENGTH=230 | 201606 [AT1G67700.1,AT1G67700.2,AT1G67700.3,AT1G67700.4,AT1G67700.5]	2	2	1.994	26010.9	AT1G67700.1;AT1G67700.2;AT1G67700.3;AT1G67700.4;AT1G67700.5	6.55405	0.000336368	0.00245607	0.999999	AT1G67700.1;AT1G67700.2;AT1G67700.3;AT1G67700.4;AT1G67700.5	4.59184	0.0162042	0.0328479	0.817424	AT1G67700.1;AT1G67700.2;AT1G67700.3;AT1G67700.4;AT1G67700.5	4.54681	0.00212026	0.0270785	0.998903	AT1G67700.1;AT1G67700.2;AT1G67700.3;AT1G67700.4;AT1G67700.5	2.66021	0.0109237	0.0358618	0.884943	AT1G67700.1;AT1G67700.2;AT1G67700.3;AT1G67700.4;AT1G67700.5	1.10684	0.614508	0.858812	0.0731426	AT1G67700.1;AT1G67700.2;AT1G67700.3;AT1G67700.4;AT1G67700.5	1.92378	0.00479195	0.144956	0.969101	AT1G67700.1;AT1G67700.2;AT1G67700.3;AT1G67700.4;AT1G67700.5	1.64185	0.0547861	0.742917	0.529288	AT1G67700.1;AT1G67700.2;AT1G67700.3;AT1G67700.4;AT1G67700.5	1.42732	0.228758	0.7799	0.205322	AT1G67700.1;AT1G67700.2;AT1G67700.3;AT1G67700.4;AT1G67700.5	1.44146	0.222541
plastid	AT5G07020.1	| proline-rich family protein | Chr5:2180669-2182284 REVERSE LENGTH=235 | 201606	4	3	3.981	24395	AT5G07020.1	6.54473	3.02095e-06	0.000168708	1	AT5G07020.1	5.4632	3.88309e-07	3.27019e-05	1	AT5G07020.1	5.36921	8.52067e-05	0.00710322	1	AT5G07020.1	3.20003	7.24167e-07	0.000191772	1	AT5G07020.1	1.29779	0.486456	0.799915	0.0956569	AT5G07020.1	1.3863	0.000589305	0.0571664	0.999967	AT5G07020.1	1.02962	0.761536	0.924897	0.0582074	AT5G07020.1	1.19796	0.0452489	0.605067	0.56045	AT5G07020.1	1.21894	0.124077
plastid	AT3G60750.1;AT3G60750.2	| Transketolase | Chr3:22454004-22456824 FORWARD LENGTH=741 | 201606 [AT3G60750.1,AT3G60750.2]	31	26	43.736	79970.1	AT3G60750.1;AT3G60750.2	6.50898	4.4897e-06	0.000205555	1	AT3G60750.1;AT3G60750.2	5.96138	1.11684e-06	5.80355e-05	1	AT3G60750.1;AT3G60750.2	4.31432	0.0132026	0.0684651	0.880642	AT3G60750.1;AT3G60750.2	3.10911	1.5616e-05	0.00063541	1	AT3G60750.1;AT3G60750.2	1.55959	0.0179148	0.27177	0.79755	AT3G60750.1;AT3G60750.2	1.4079	0.00453728	0.14269	0.972241	AT3G60750.1;AT3G60750.2	1.09765	0.293763	0.789608	0.162854	AT3G60750.1;AT3G60750.2	1.09186	0.296373	0.796387	0.162544	AT3G60750.1;AT3G60750.2	1.50869	0.133392
extracellular	AT2G38380.1	| Peroxidase superfamily protein | Chr2:16076443-16078314 FORWARD LENGTH=349 | 201606	3	3	3.981	38109.2	AT2G38380.1	6.49869	0.000460503	0.00300421	0.999991	AT2G38380.1	5.26085	2.61975e-05	0.000369822	1	AT2G38380.1	8.65642	0.00137918	0.0229052	0.99985	AT2G38380.1	3.33367	0.00058769	0.0052032	0.999968	AT2G38380.1	1.64829	0.000463786	0.0674891	0.999991	AT2G38380.1	1.24898	0.0572679	0.463433	0.51791	AT2G38380.1	1.06927	0.273723	0.789232	0.174143	AT2G38380.1	1.23529	0.453338	0.833368	0.104561	AT2G38380.1	0.750736	0.420996
plastid	AT1G71920.2;AT1G71920.6;AT5G10330.1;AT5G10330.2	| HISTIDINE BIOSYNTHESIS 6B | Chr1:27067168-27068999 FORWARD LENGTH=417 | 201606 [AT1G71920.2,AT1G71920.6,AT5G10330.1,AT5G10330.2]	2	2	1.992	46636.2	AT1G71920.2;AT1G71920.6;AT5G10330.1;AT5G10330.2	6.47941	0.00156235	0.00688628	0.998228	AT1G71920.2;AT1G71920.6;AT5G10330.1;AT5G10330.2	5.39622	0.00514168	0.0134969	0.964664	AT1G71920.2;AT1G71920.6;AT5G10330.1;AT5G10330.2	1.06491	0.625717	0.735783	0.0698892	AT1G71920.2;AT1G71920.6;AT5G10330.1;AT5G10330.2	1.40427	0.531233	0.63763	0.0864783	AT1G71920.2;AT1G71920.6;AT5G10330.1;AT5G10330.2	1.29466	0.102656	0.49403	0.372694	AT1G71920.2;AT1G71920.6;AT5G10330.1;AT5G10330.2	1.60431	0.0328016	0.370382	0.659738	AT1G71920.2;AT1G71920.6;AT5G10330.1;AT5G10330.2	1.37308	0.0401979	0.742917	0.608678	AT1G71920.2;AT1G71920.6;AT5G10330.1;AT5G10330.2	1.20073	0.599005	0.886943	0.0758828	AT1G71920.2;AT1G71920.6;AT5G10330.1;AT5G10330.2	6.08445	0.0165645
plastid	AT1G21600.1;AT1G21600.2	| plastid transcriptionally active 6 | Chr1:7571514-7573782 REVERSE LENGTH=328 | 201606 [AT1G21600.1,AT1G21600.2]	7	5	6.865	37378.1	AT1G21600.1;AT1G21600.2	6.44502	0.0284731	0.0579496	0.694232	AT1G21600.1;AT1G21600.2	5.71854	0.0465995	0.0783131	0.570894	AT1G21600.1;AT1G21600.2	4.26564	0.234268	0.377952	0.192203	AT1G21600.1;AT1G21600.2	4.42421	0.0462919	0.102732	0.572595	AT1G21600.1;AT1G21600.2	2.50166	0.154291	0.57996	0.281423	AT1G21600.1;AT1G21600.2	1.93119	0.232422	0.705577	0.201958	AT1G21600.1;AT1G21600.2	1.45475	0.338196	0.806284	0.141689	AT1G21600.1;AT1G21600.2	1.12704	0.529389	0.857957	0.0875944	AT1G21600.1;AT1G21600.2	1.51092	0.267792
cytosol	AT5G09890.1;AT5G09890.2	| Protein kinase family protein | Chr5:3085810-3088842 REVERSE LENGTH=515 | 201606 [AT5G09890.1,AT5G09890.2]	2	2	1.993	59254.7	AT5G09890.1;AT5G09890.2	6.43829	0.0212498	0.0460714	0.761519	AT5G09890.1;AT5G09890.2	6.85237	0.0193143	0.0378531	0.782005	AT5G09890.1;AT5G09890.2	4.42249	0.138703	0.272263	0.29535	AT5G09890.1;AT5G09890.2	4.18405	0.0469292	0.103828	0.569085	AT5G09890.1;AT5G09890.2	0.706764	0.525129	0.822786	0.0876367	AT5G09890.1;AT5G09890.2	1.37055	0.516304	0.864249	0.0893607	AT5G09890.1;AT5G09890.2	0.837763	0.909078	0.970486	0.0511489	AT5G09890.1;AT5G09890.2	0.939572	0.600137	0.886974	0.075717	AT5G09890.1;AT5G09890.2	1.45581	0.236162
plastid	AT4G33520.2;AT4G33520.3	| P-type ATP-ase 1 | Chr4:16118993-16125849 FORWARD LENGTH=949 | 201606 [AT4G33520.2,AT4G33520.3]	2	2	1.987	99997	AT4G33520.2;AT4G33520.3	6.43348	0.00012241	0.00132151	1	AT4G33520.2;AT4G33520.3	3.52054	0.00272465	0.00838683	0.991185	AT4G33520.2;AT4G33520.3	4.20849	0.0363679	0.121977	0.645049	AT4G33520.2;AT4G33520.3	1.86946	0.0152469	0.0459034	0.828975	AT4G33520.2;AT4G33520.3	0.888158	0.543769	0.829639	0.0841844	AT4G33520.2;AT4G33520.3	0.579916	0.0227303	0.316481	0.746599	AT4G33520.2;AT4G33520.3	0.777698	0.381047	0.815343	0.125189	AT4G33520.2;AT4G33520.3	1.82741	0.0290992	0.559862	0.663968	AT4G33520.2;AT4G33520.3	1.52869	0.188248
plastid	AT4G22890.1;AT4G22890.2;AT4G22890.3;AT4G22890.4;AT4G22890.5	| PGR5-LIKE A | Chr4:12007157-12009175 FORWARD LENGTH=324 | 201606 [AT4G22890.1,AT4G22890.2,AT4G22890.3,AT4G22890.4,AT4G22890.5]	6	4	7.976	35722.8	AT4G22890.1;AT4G22890.2;AT4G22890.3;AT4G22890.4;AT4G22890.5	6.39044	0.000224022	0.00188522	1	AT4G22890.1;AT4G22890.2;AT4G22890.3;AT4G22890.4;AT4G22890.5	5.05771	0.000440611	0.00226409	0.999993	AT4G22890.1;AT4G22890.2;AT4G22890.3;AT4G22890.4;AT4G22890.5	3.93984	0.00455307	0.0391079	0.985865	AT4G22890.1;AT4G22890.2;AT4G22890.3;AT4G22890.4;AT4G22890.5	1.94903	0.0236756	0.0636159	0.737396	AT4G22890.1;AT4G22890.2;AT4G22890.3;AT4G22890.4;AT4G22890.5	1.11201	0.806166	0.936554	0.0553411	AT4G22890.1;AT4G22890.2;AT4G22890.3;AT4G22890.4;AT4G22890.5	1.19263	0.332037	0.762539	0.144348	AT4G22890.1;AT4G22890.2;AT4G22890.3;AT4G22890.4;AT4G22890.5	0.792736	0.471198	0.839276	0.0991761	AT4G22890.1;AT4G22890.2;AT4G22890.3;AT4G22890.4;AT4G22890.5	1.26351	0.000871427	0.233038	0.998759	AT4G22890.1;AT4G22890.2;AT4G22890.3;AT4G22890.4;AT4G22890.5	1.622	0.00036496
peroxisome	AT5G09660.1	| peroxisomal NAD-malate dehydrogenase 2 | Chr5:2993645-2995551 REVERSE LENGTH=354 | 201606	10	8	11.865	37369.4	AT5G09660.1	6.3635	5.19628e-06	0.000216968	1	AT5G09660.1	5.95775	9.77809e-06	0.000198383	1	AT5G09660.1	4.10093	0.000326589	0.0122942	1	AT5G09660.1	2.88592	0.000156833	0.00234385	1	AT5G09660.1	1.40955	0.12642	0.536283	0.324689	AT5G09660.1	1.32008	0.0585285	0.46548	0.512326	AT5G09660.1	1.08041	0.388878	0.81822	0.122509	AT5G09660.1	1.0681	0.141386	0.727088	0.297859	AT5G09660.1	1.55172	0.000443837
plastid	AT5G35970.1	| P-loop containing nucleoside triphosphate hydrolases superfamily protein | Chr5:14119060-14123078 REVERSE LENGTH=961 | 201606	8	8	8.903	105049	AT5G35970.1	6.3496	0.00630185	0.018353	0.949207	AT5G35970.1	4.49049	0.00697418	0.0169827	0.939926	AT5G35970.1	2.43388	0.181237	0.321588	0.239504	AT5G35970.1	0.775947	0.693155	0.775906	0.0640049	AT5G35970.1	1.20881	0.511603	0.813543	0.0903038	AT5G35970.1	1.38058	0.321683	0.75586	0.149004	AT5G35970.1	1.17869	0.924281	0.978175	0.0507953	AT5G35970.1	1.41401	0.189337	0.756707	0.239798	AT5G35970.1	2.60884	0.0443527
plastid	AT4G20360.1;AT4G20360.2	| RAB GTPase homolog E1B | Chr4:10990036-10991466 FORWARD LENGTH=476 | 201606 [AT4G20360.1,AT4G20360.2]	21	19	25.847	51630.7	AT4G20360.1;AT4G20360.2	6.34801	5.63252e-06	0.000219464	1	AT4G20360.1;AT4G20360.2	6.05659	5.46429e-07	3.76638e-05	1	AT4G20360.1;AT4G20360.2	5.44058	2.84322e-05	0.00516044	1	AT4G20360.1;AT4G20360.2	3.6987	6.05299e-06	0.000433258	1	AT4G20360.1;AT4G20360.2	1.91252	0.0149557	0.256475	0.832551	AT4G20360.1;AT4G20360.2	1.59064	0.000991048	0.0719501	0.99966	AT4G20360.1;AT4G20360.2	1.2738	0.0124576	0.594609	0.864401	AT4G20360.1;AT4G20360.2	1.04812	0.613534	0.892771	0.0738101	AT4G20360.1;AT4G20360.2	1.16679	0.185688
plastid	AT1G79600.1	| Protein kinase superfamily protein | Chr1:29950105-29952516 REVERSE LENGTH=711 | 201606	3	3	2.991	79025.7	AT1G79600.1	6.31271	0.000495737	0.00316499	0.999987	AT1G79600.1	4.91282	0.000456264	0.0023209	0.999992	AT1G79600.1	5.48158	0.00275116	0.0303943	0.997032	AT1G79600.1	4.69601	0.000579096	0.0051631	0.99997	AT1G79600.1	2.13229	0.0297648	0.332142	0.683531	AT1G79600.1	1.74763	0.111984	0.571896	0.352324	AT1G79600.1	1.39797	0.91989	0.976169	0.0508907	AT1G79600.1	1.28495	0.116838	0.713015	0.33856	AT1G79600.1	1.15162	0.466683
plastid	AT3G09050.1	| 8-amino-7-oxononanoate synthase | Chr3:2764860-2765907 FORWARD LENGTH=258 | 201606	6	5	5.904	29250	AT3G09050.1	6.3017	0.000361943	0.00257089	0.999998	AT3G09050.1	7.55929	7.82527e-06	0.000180427	1	AT3G09050.1	3.6054	0.0157768	0.0755679	0.847701	AT3G09050.1	3.32747	4.37661e-05	0.00117063	1	AT3G09050.1	1.9409	0.0148593	0.255983	0.833741	AT3G09050.1	1.46145	0.0298799	0.356634	0.682595	AT3G09050.1	1.01304	0.950384	0.982868	0.0503406	AT3G09050.1	0.833636	0.27022	0.792029	0.177194	AT3G09050.1	1.74785	0.110276
plastid	AT2G20890.1	| photosystem II reaction center PSB29 protein | Chr2:8987783-8989185 FORWARD LENGTH=300 | 201606	4	4	3.981	33797.2	AT2G20890.1	6.30164	1.67147e-05	0.000410359	1	AT2G20890.1	6.98595	1.37057e-05	0.000247753	1	AT2G20890.1	5.52418	0.000244167	0.0109682	1	AT2G20890.1	3.80983	0.000106252	0.0018842	1	AT2G20890.1	1.73698	0.00121706	0.0946254	0.999253	AT2G20890.1	1.30091	0.0168834	0.269558	0.809415	AT2G20890.1	1.16113	0.193381	0.763824	0.23595	AT2G20890.1	0.902045	0.434397	0.824494	0.109645	AT2G20890.1	1.14074	0.396873
plastid	AT5G66190.1;AT5G66190.2	| ferredoxin-NADP[+]-oxidoreductase 1 | Chr5:26451203-26453012 REVERSE LENGTH=360 | 201606	21	21	28.729	40327.5	AT5G66190.1;AT5G66190.2	6.29375	6.63739e-06	0.000237379	1	AT5G66190.1;AT5G66190.2	5.87186	8.1731e-06	0.000182902	1	AT5G66190.1;AT5G66190.2	4.94444	0.000608934	0.0155508	0.999999	AT5G66190.1;AT5G66190.2	3.10959	8.49361e-05	0.00166658	1	AT5G66190.1;AT5G66190.2	1.33025	0.148529	0.565723	0.289471	AT5G66190.1;AT5G66190.2	1.26696	0.0765047	0.499071	0.444381	AT5G66190.1;AT5G66190.2	1.00823	0.96406	0.987675	0.0501786	AT5G66190.1;AT5G66190.2	1.07185	0.0155688	0.494837	0.79436	AT5G66190.1;AT5G66190.2	1.27289	0.0516613
plastid	AT5G45930.1	| magnesium chelatase i2 | Chr5:18628095-18629565 FORWARD LENGTH=418 | 201606	15	6	16.878	46098.3	AT5G45930.1	6.29323	9.23424e-05	0.0011329	1	AT5G45930.1	5.35237	1.73786e-06	7.22883e-05	1	AT5G45930.1	4.16114	0.000291242	0.0117467	1	AT5G45930.1	3.27839	2.82534e-06	0.000289182	1	AT5G45930.1	1.90328	0.00319881	0.122228	0.986968	AT5G45930.1	1.67262	0.000166241	0.036732	1	AT5G45930.1	1.2488	0.0112058	0.593805	0.881114	AT5G45930.1	1.17578	0.340566	0.802862	0.141836	AT5G45930.1	1.51238	0.0736443
plastid	AT1G50250.1	| FTSH protease 1 | Chr1:18614398-18616930 REVERSE LENGTH=716 | 201606	24	5	27.791	76761.1	AT1G50250.1	6.29095	7.77558e-06	0.000265205	1	AT1G50250.1	5.64449	5.1374e-06	0.000135981	1	AT1G50250.1	5.72736	0.000629155	0.0159073	0.999999	AT1G50250.1	3.77052	1.88729e-05	0.00072459	1	AT1G50250.1	1.78421	0.0110187	0.22753	0.883651	AT1G50250.1	1.70689	0.0034234	0.124269	0.984757	AT1G50250.1	1.36142	0.0652929	0.742917	0.484379	AT1G50250.1	1.11453	0.120842	0.71572	0.331225	AT1G50250.1	1.0984	0.458848
plastid	AT4G15110.1	| cytochrome P450%2C family 97%2C subfamily B%2C polypeptide 3 | Chr4:8629922-8632993 REVERSE LENGTH=580 | 201606	4	4	3.988	65178	AT4G15110.1	6.2889	0.0148431	0.0349387	0.833941	AT4G15110.1	12.6553	0.00842784	0.0196921	0.919561	AT4G15110.1	12.1164	0.0330861	0.116282	0.670744	AT4G15110.1	5.76195	0.0420124	0.0957861	0.59743	AT4G15110.1	2.63777	0.114529	0.517658	0.347134	AT4G15110.1	1.59086	0.626006	0.908177	0.0716194	AT4G15110.1	1.66328	0.268797	0.789232	0.177116	AT4G15110.1	0.496937	0.0531097	0.628633	0.522004	AT4G15110.1	0.519042	0.248721
cytosol	AT2G23600.1;AT2G23600.2	| acetone-cyanohydrin lyase | Chr2:10042325-10043641 REVERSE LENGTH=263 | 201606 [AT2G23600.1,AT2G23600.2]	2	2	2.991	29667.5	AT2G23600.1;AT2G23600.2	6.2885	0.000488693	0.00313975	0.999988	AT2G23600.1;AT2G23600.2	6.08011	0.000651012	0.00297862	0.999947	AT2G23600.1;AT2G23600.2	4.38083	0.00684204	0.0484279	0.962553	AT2G23600.1;AT2G23600.2	2.72561	0.00665603	0.0259203	0.944337	AT2G23600.1;AT2G23600.2	1.72386	0.0490699	0.395203	0.557622	AT2G23600.1;AT2G23600.2	1.63456	0.213439	0.689573	0.217357	AT2G23600.1;AT2G23600.2	1.1653	0.648254	0.889185	0.0688625	AT2G23600.1;AT2G23600.2	1.03427	0.68146	0.910834	0.0655524	AT2G23600.1;AT2G23600.2	1.43546	0.0207582
plastid	AT1G32220.1	| NAD(P)-binding Rossmann-fold superfamily protein | Chr1:11608038-11609591 FORWARD LENGTH=296 | 201606	2	2	1.994	31979.1	AT1G32220.1	6.28497	1.47511e-06	0.000111508	1	AT1G32220.1	6.02314	1.37072e-06	6.39134e-05	1	AT1G32220.1	3.7125	8.89661e-05	0.00710322	1	AT1G32220.1	2.10489	0.000163607	0.00240303	1	AT1G32220.1	1.14983	0.155146	0.580966	0.280264	AT1G32220.1	1.0797	0.660375	0.917108	0.0674613	AT1G32220.1	1.20505	0.140195	0.751498	0.30188	AT1G32220.1	1.04347	0.0481706	0.605991	0.545449	AT1G32220.1	1.69292	4.09707e-06
plastid	AT3G48420.1	| Haloacid dehalogenase-like hydrolase (HAD) superfamily protein | Chr3:17929743-17931551 FORWARD LENGTH=319 | 201606	8	8	7.962	34246.4	AT3G48420.1	6.26742	2.21496e-05	0.000493702	1	AT3G48420.1	6.43299	0.000109423	0.00091013	1	AT3G48420.1	5.80819	1.9566e-05	0.00405256	1	AT3G48420.1	4.01233	2.34692e-06	0.000265046	1	AT3G48420.1	1.57005	0.035517	0.353533	0.63994	AT3G48420.1	1.58147	0.00298149	0.121667	0.988981	AT3G48420.1	1.05165	0.792166	0.934491	0.0561676	AT3G48420.1	0.974262	0.94854	0.9899	0.0503762	AT3G48420.1	1.07907	0.617797
plastid	AT1G35340.1;AT1G35340.2;AT1G35340.4;AT1G35340.6;AT1G35340.7	| ATP-dependent protease La (LON) domain protein | Chr1:12977768-12979749 FORWARD LENGTH=316 | 201606 [AT1G35340.1,AT1G35340.2,AT1G35340.4,AT1G35340.6,AT1G35340.7]	7	6	6.971	35322.2	AT1G35340.1;AT1G35340.2;AT1G35340.4;AT1G35340.6;AT1G35340.7	6.24681	9.74762e-05	0.00116013	1	AT1G35340.1;AT1G35340.2;AT1G35340.4;AT1G35340.6;AT1G35340.7	5.4445	4.8544e-05	0.000537474	1	AT1G35340.1;AT1G35340.2;AT1G35340.4;AT1G35340.6;AT1G35340.7	5.07229	0.00108164	0.0214555	0.999961	AT1G35340.1;AT1G35340.2;AT1G35340.4;AT1G35340.6;AT1G35340.7	2.74782	0.00151155	0.00954247	0.99841	AT1G35340.1;AT1G35340.2;AT1G35340.4;AT1G35340.6;AT1G35340.7	1.56129	0.0801416	0.4627	0.43281	AT1G35340.1;AT1G35340.2;AT1G35340.4;AT1G35340.6;AT1G35340.7	2.16766	0.296085	0.742589	0.161623	AT1G35340.1;AT1G35340.2;AT1G35340.4;AT1G35340.6;AT1G35340.7	1.17724	0.396827	0.818738	0.119881	AT1G35340.1;AT1G35340.2;AT1G35340.4;AT1G35340.6;AT1G35340.7	1.14736	0.199597	0.764822	0.229918	AT1G35340.1;AT1G35340.2;AT1G35340.4;AT1G35340.6;AT1G35340.7	1.23156	0.193973
plastid	AT1G73530.1	| RNA-binding (RRM/RBD/RNP motifs) family protein | Chr1:27643801-27645386 REVERSE LENGTH=181 | 201606	2	1	1.994	20063.6	AT1G73530.1	6.22863	3.67113e-05	0.00065903	1	AT1G73530.1	5.78927	0.000367872	0.00198464	0.999998	AT1G73530.1	4.46732	0.942333	0.964449	0.050421	AT1G73530.1	2.42607	0.000432878	0.00429665	0.999994	AT1G73530.1	1.35038	0.153498	0.578942	0.282506	AT1G73530.1	1.36152	0.483898	0.848868	0.096232	AT1G73530.1	0.952229	0.695555	0.901507	0.0637701	AT1G73530.1	1.07589	0.641033	0.899768	0.0701952	AT1G73530.1	1.39426	0.286507
plastid	AT3G55760.1;AT3G55760.2;AT3G55760.3	| hypothetical protein | Chr3:20700648-20702886 FORWARD LENGTH=578 | 201606 [AT3G55760.1,AT3G55760.2,AT3G55760.3]	3	3	2.955	65572	AT3G55760.1;AT3G55760.2;AT3G55760.3	6.16114	0.000467226	0.00304026	0.999991	AT3G55760.1;AT3G55760.2;AT3G55760.3	4.10661	0.00237188	0.00757632	0.993864	AT3G55760.1;AT3G55760.2;AT3G55760.3	2.59608	0.000901106	0.0192413	0.999987	AT3G55760.1;AT3G55760.2;AT3G55760.3	1.44049	0.0566273	0.119759	0.520798	AT3G55760.1;AT3G55760.2;AT3G55760.3	0.937473	0.629498	0.865081	0.0711702	AT3G55760.1;AT3G55760.2;AT3G55760.3	1.25377	0.906149	0.983356	0.0512247	AT3G55760.1;AT3G55760.2;AT3G55760.3	0.892837	0.504385	0.846257	0.0917863	AT3G55760.1;AT3G55760.2;AT3G55760.3	1.5003	0.162384	0.742639	0.26964	AT3G55760.1;AT3G55760.2;AT3G55760.3	2.37325	0.0118451
plastid	AT1G08520.1	| ALBINA 1 | Chr1:2696538-2700819 FORWARD LENGTH=760 | 201606	16	15	16.697	83285.6	AT1G08520.1	6.09984	9.41467e-05	0.00113918	1	AT1G08520.1	5.36169	2.22344e-05	0.000335889	1	AT1G08520.1	5.56727	0.000408897	0.0133534	1	AT1G08520.1	3.62061	0.000217235	0.00285269	1	AT1G08520.1	1.62747	0.174636	0.598854	0.255988	AT1G08520.1	1.41374	0.0549058	0.458251	0.528727	AT1G08520.1	1.30113	0.180108	0.763824	0.249838	AT1G08520.1	1.13767	0.310719	0.796387	0.155319	AT1G08520.1	1.09566	0.573815
plastid	AT1G32990.1	| plastid ribosomal protein l11 | Chr1:11955827-11957139 FORWARD LENGTH=222 | 201606	8	8	8.914	23149.4	AT1G32990.1	6.08974	6.61754e-06	0.000237379	1	AT1G32990.1	5.8204	1.38921e-07	1.87256e-05	1	AT1G32990.1	5.68805	8.33578e-06	0.00251867	1	AT1G32990.1	3.77299	7.40853e-05	0.0015243	1	AT1G32990.1	1.72445	0.0188027	0.275375	0.787615	AT1G32990.1	1.66295	0.010446	0.214926	0.891473	AT1G32990.1	1.30519	0.084684	0.742917	0.419182	AT1G32990.1	1.04628	0.631637	0.896881	0.0713866	AT1G32990.1	1.07062	0.532504
plastid	AT3G07670.1;AT3G07670.2	| Rubisco methyltransferase family protein | Chr3:2451651-2454617 FORWARD LENGTH=504 | 201606 [AT3G07670.1,AT3G07670.2]	5	5	4.985	57616.8	AT3G07670.1;AT3G07670.2	6.08276	5.48437e-05	0.000829512	1	AT3G07670.1;AT3G07670.2	4.99604	0.00164247	0.00573285	0.997917	AT3G07670.1;AT3G07670.2	5.84605	0.00264108	0.0296946	0.997437	AT3G07670.1;AT3G07670.2	4.40081	0.000126236	0.00208969	1	AT3G07670.1;AT3G07670.2	1.77818	0.147927	0.565723	0.290335	AT3G07670.1;AT3G07670.2	1.56439	0.0637167	0.479716	0.490605	AT3G07670.1;AT3G07670.2	1.37328	0.0721365	0.742917	0.459135	AT3G07670.1;AT3G07670.2	1.21752	0.277233	0.795831	0.173061	AT3G07670.1;AT3G07670.2	1.04049	0.699999
plastid	AT5G13410.1	| FKBP-like peptidyl-prolyl cis-trans isomerase family protein | Chr5:4299830-4301706 REVERSE LENGTH=256 | 201606	2	1	1.994	27779.6	AT5G13410.1	6.05399	7.71807e-06	0.000265205	1	AT5G13410.1	5.4126	2.4895e-07	2.63576e-05	1	AT5G13410.1	4.43041	0.00688945	0.048628	0.962	AT5G13410.1	3.2424	6.76574e-07	0.000191772	1	AT5G13410.1	1.59137	0.0195748	0.277875	0.77918	AT5G13410.1	1.53858	0.0113665	0.22132	0.878943	AT5G13410.1	1.2185	0.0462356	0.742917	0.572907	AT5G13410.1	1.1185	0.259166	0.785351	0.184043	AT5G13410.1	1.36646	0.191559
plastid	AT5G52970.1;AT5G52970.2	| thylakoid lumen 15.0 kDa protein | Chr5:21479620-21481018 FORWARD LENGTH=223 | 201606 [AT5G52970.1,AT5G52970.2]	6	5	5.932	24569.5	AT5G52970.1;AT5G52970.2	5.99594	0.000573349	0.00348119	0.999972	AT5G52970.1;AT5G52970.2	5.59891	1.047e-07	1.66748e-05	1	AT5G52970.1;AT5G52970.2	4.71883	0.00160709	0.0241634	0.999678	AT5G52970.1;AT5G52970.2	3.37299	1.47938e-05	0.000630061	1	AT5G52970.1;AT5G52970.2	1.638	0.00861591	0.209503	0.916921	AT5G52970.1;AT5G52970.2	1.62125	0.00328822	0.121667	0.986103	AT5G52970.1;AT5G52970.2	1.12463	0.145086	0.756486	0.294482	AT5G52970.1;AT5G52970.2	1.07091	0.923496	0.983525	0.0508335	AT5G52970.1;AT5G52970.2	1.27064	0.445441
plastid	AT5G04360.1;AT5G04360.2	| limit dextrinase | Chr5:1221566-1228399 FORWARD LENGTH=965 | 201606 [AT5G04360.1,AT5G04360.2]	7	7	6.94	107070	AT5G04360.1;AT5G04360.2	5.96452	0.00110409	0.00540039	0.999481	AT5G04360.1;AT5G04360.2	5.87526	0.000103082	0.000882661	1	AT5G04360.1;AT5G04360.2	3.34772	0.0158894	0.0757505	0.846294	AT5G04360.1;AT5G04360.2	1.97222	0.0124196	0.0394972	0.864901	AT5G04360.1;AT5G04360.2	0.910122	0.714907	0.900263	0.0619632	AT5G04360.1;AT5G04360.2	0.985192	0.937814	0.989721	0.0505357	AT5G04360.1;AT5G04360.2	0.997691	0.905329	0.969377	0.0512463	AT5G04360.1;AT5G04360.2	1.01519	0.888732	0.97467	0.0517716	AT5G04360.1;AT5G04360.2	1.78167	0.0999058
plastid	AT5G61410.1;AT5G61410.2	| D-ribulose-5-phosphate-3-epimerase | Chr5:24684085-24685836 REVERSE LENGTH=281 | 201606 [AT5G61410.1,AT5G61410.2]	3	3	4.97	30008.5	AT5G61410.1;AT5G61410.2	5.96445	0.000133841	0.00140243	1	AT5G61410.1;AT5G61410.2	6.57367	7.58631e-06	0.000177025	1	AT5G61410.1;AT5G61410.2	5.94894	0.000463638	0.0140516	1	AT5G61410.1;AT5G61410.2	4.04236	3.74897e-05	0.0010887	1	AT5G61410.1;AT5G61410.2	1.70684	0.0905872	0.474363	0.402701	AT5G61410.1;AT5G61410.2	1.51691	0.0140167	0.249066	0.844278	AT5G61410.1;AT5G61410.2	0.880002	0.531883	0.853767	0.0863567	AT5G61410.1;AT5G61410.2	0.907324	0.372289	0.803914	0.129438	AT5G61410.1;AT5G61410.2	1.00261	0.993435
plastid	AT4G35250.1	| NAD(P)-binding Rossmann-fold superfamily protein | Chr4:16771401-16773269 REVERSE LENGTH=395 | 201606	7	6	7.931	43723.8	AT4G35250.1	5.96392	4.77938e-05	0.000766209	1	AT4G35250.1	5.15255	6.20582e-05	0.000621113	1	AT4G35250.1	4.98391	0.00222313	0.0277816	0.998671	AT4G35250.1	2.87258	0.000852505	0.00669618	0.999818	AT4G35250.1	1.20711	0.226702	0.638355	0.206398	AT4G35250.1	1.5593	0.041961	0.416248	0.597743	AT4G35250.1	1.05732	0.606988	0.87744	0.074177	AT4G35250.1	1.15747	0.0122399	0.462063	0.836558	AT4G35250.1	1.19663	0.214052
plasma membrane	AT4G27520.1	| early nodulin-like protein 2 | Chr4:13750668-13751819 REVERSE LENGTH=349 | 201606	6	6	7.971	35064.9	AT4G27520.1	5.95094	2.04924e-06	0.000138316	1	AT4G27520.1	5.122	3.19968e-07	3.06807e-05	1	AT4G27520.1	4.99338	7.61952e-06	0.00251867	1	AT4G27520.1	2.82375	4.42694e-08	7.20725e-05	1	AT4G27520.1	1.57955	0.000709782	0.0784154	0.99992	AT4G27520.1	1.35974	0.00389587	0.131992	0.979729	AT4G27520.1	1.19467	0.0221425	0.658059	0.752447	AT4G27520.1	1.16184	0.0815012	0.674442	0.420147	AT4G27520.1	1.19177	0.091316
plastid	AT3G02730.1	| thioredoxin F-type 1 | Chr3:588570-589591 REVERSE LENGTH=178 | 201606	6	5	5.962	19325.5	AT3G02730.1	5.95074	5.05691e-06	0.000216968	1	AT3G02730.1	6.04099	7.67883e-07	4.4504e-05	1	AT3G02730.1	5.64097	0.000599574	0.0155461	0.999999	AT3G02730.1	3.45572	1.05095e-05	0.000550609	1	AT3G02730.1	1.58727	0.0022827	0.110993	0.994472	AT3G02730.1	1.42441	0.00355451	0.128114	0.98341	AT3G02730.1	0.992941	0.935203	0.982123	0.0505817	AT3G02730.1	0.98506	0.773778	0.940007	0.0575406	AT3G02730.1	1.05491	0.642888
plastid	AT1G51100.1	| potassium/sodium hyperpolarization-activated cyclic nucleotide-gated channel protein | Chr1:18934342-18934977 FORWARD LENGTH=211 | 201606	3	3	2.954	24161.9	AT1G51100.1	5.94866	0.000362201	0.00257089	0.999998	AT1G51100.1	6.22884	0.000196962	0.00131676	1	AT1G51100.1	3.37972	0.00630379	0.0462278	0.968664	AT1G51100.1	1.92317	0.0808204	0.154828	0.430717	AT1G51100.1	1.19347	0.441072	0.783435	0.106797	AT1G51100.1	1.53377	0.0464096	0.430199	0.571943	AT1G51100.1	1.1735	0.304595	0.795799	0.157241	AT1G51100.1	0.955019	0.680057	0.909547	0.065701	AT1G51100.1	1.7601	0.0165496
plastid	AT3G63160.1	| outer envelope membrane protein | Chr3:23333773-23333982 REVERSE LENGTH=69 | 201606	3	3	2.977	7256.4	AT3G63160.1	5.94408	1.70513e-06	0.000123004	1	AT3G63160.1	4.2935	3.71569e-07	3.27019e-05	1	AT3G63160.1	3.30991	0.00232838	0.0283761	0.998405	AT3G63160.1	1.9782	5.60822e-06	0.000419132	1	AT3G63160.1	0.936535	0.378143	0.744753	0.126207	AT3G63160.1	0.912253	0.264776	0.723798	0.179606	AT3G63160.1	0.858326	0.00291664	0.44641	0.989557	AT3G63160.1	1.38444	0.00262236	0.335811	0.981914	AT3G63160.1	1.79584	0.0114659
plastid	AT1G16720.1;AT1G16720.2;AT1G16720.3	| high chlorophyll fluorescence phenotype 173 | Chr1:5723161-5726248 FORWARD LENGTH=598 | 201606 [AT1G16720.1,AT1G16720.2,AT1G16720.3]	13	12	12.792	65709.9	AT1G16720.1;AT1G16720.2;AT1G16720.3	5.92777	8.09883e-05	0.00106078	1	AT1G16720.1;AT1G16720.2;AT1G16720.3	4.43703	1.92906e-05	0.000312214	1	AT1G16720.1;AT1G16720.2;AT1G16720.3	4.03317	0.0211111	0.0882324	0.784767	AT1G16720.1;AT1G16720.2;AT1G16720.3	2.72288	0.00147667	0.00941892	0.998529	AT1G16720.1;AT1G16720.2;AT1G16720.3	1.23729	0.463743	0.790676	0.100976	AT1G16720.1;AT1G16720.2;AT1G16720.3	1.52267	0.264528	0.723798	0.179761	AT1G16720.1;AT1G16720.2;AT1G16720.3	1.21531	0.296489	0.789608	0.161411	AT1G16720.1;AT1G16720.2;AT1G16720.3	1.33598	0.0896232	0.681383	0.398131	AT1G16720.1;AT1G16720.2;AT1G16720.3	1.46975	0.201104
golgi	AT1G45201.1;AT1G45201.2;AT1G45201.3	| triacylglycerol lipase-like 1 | Chr1:17123889-17128462 FORWARD LENGTH=479 | 201606 [AT1G45201.1,AT1G45201.2,AT1G45201.3]	7	6	6.893	54779.7	AT1G45201.1;AT1G45201.2;AT1G45201.3	5.90899	0.00558022	0.0168802	0.958934	AT1G45201.1;AT1G45201.2;AT1G45201.3	4.68904	0.00691836	0.0168709	0.940702	AT1G45201.1;AT1G45201.2;AT1G45201.3	3.77491	0.0423442	0.133827	0.603086	AT1G45201.1;AT1G45201.2;AT1G45201.3	3.5148	0.0179724	0.0515438	0.796898	AT1G45201.1;AT1G45201.2;AT1G45201.3	2.26724	0.0864315	0.471203	0.414165	AT1G45201.1;AT1G45201.2;AT1G45201.3	1.78194	0.135916	0.6206	0.308639	AT1G45201.1;AT1G45201.2;AT1G45201.3	1.51901	0.205332	0.769564	0.224556	AT1G45201.1;AT1G45201.2;AT1G45201.3	1.26017	0.171874	0.746579	0.258417	AT1G45201.1;AT1G45201.2;AT1G45201.3	1.56533	0.0929533
mitochondrion	AT1G77930.1;AT1G77930.2	| Chaperone DnaJ-domain superfamily protein | Chr1:29301184-29302467 FORWARD LENGTH=271 | 201606 [AT1G77930.1,AT1G77930.2]	2	2	1.994	31908.5	AT1G77930.1;AT1G77930.2	5.87943	0.00409453	0.0133627	0.977482	AT1G77930.1;AT1G77930.2	6.10998	0.00367343	0.0104643	0.982155	AT1G77930.1;AT1G77930.2	2.90611	0.0762917	0.188028	0.441522	AT1G77930.1;AT1G77930.2	3.06247	0.024893	0.0657858	0.725898	AT1G77930.1;AT1G77930.2	1.88789	0.195471	0.612463	0.233886	AT1G77930.1;AT1G77930.2	1.7475	0.830684	0.964873	0.0540473	AT1G77930.1;AT1G77930.2	0.702479	0.677695	0.895954	0.0655762	AT1G77930.1;AT1G77930.2	0.962266	0.536891	0.864641	0.0861767	AT1G77930.1;AT1G77930.2	2.02313	0.0136539
plastid	AT1G29700.1;AT1G29700.2	| Metallo-hydrolase/oxidoreductase superfamily protein | Chr1:10385196-10386906 REVERSE LENGTH=350 | 201606 [AT1G29700.1,AT1G29700.2]	3	3	2.941	38152.9	AT1G29700.1;AT1G29700.2	5.87264	0.0478552	0.0863637	0.564065	AT1G29700.1;AT1G29700.2	1.39429	0.608205	0.674868	0.0740075	AT1G29700.1;AT1G29700.2	16.5732	0.403142	0.54344	0.112947	AT1G29700.1;AT1G29700.2	0.321305	0.234915	0.348668	0.200073	AT1G29700.1;AT1G29700.2	0.368143	0.30981	0.698038	0.15465	AT1G29700.1;AT1G29700.2	0.59425	0.633902	0.908223	0.0706128	AT1G29700.1;AT1G29700.2	0.617847	0.833227	0.95007	0.053924	AT1G29700.1;AT1G29700.2	4.21194	0.052532	0.628633	0.524632	AT1G29700.1;AT1G29700.2	0.354345	0.739956
extracellular	AT4G37800.1	| xyloglucan endotransglucosylase/hydrolase 7 | Chr4:17775703-17777372 REVERSE LENGTH=293 | 201606	6	5	8.957	33681.3	AT4G37800.1	5.86957	8.73654e-07	8.87981e-05	1	AT4G37800.1	6.20303	4.66606e-07	3.54333e-05	1	AT4G37800.1	6.0259	0.000166764	0.00941661	1	AT4G37800.1	3.6564	5.19041e-05	0.00126209	1	AT4G37800.1	2.63846	1.50522e-05	0.0180138	1	AT4G37800.1	1.48187	0.000881621	0.0668716	0.99979	AT4G37800.1	1.0561	0.625022	0.882796	0.071747	AT4G37800.1	0.946242	0.112967	0.709634	0.345952	AT4G37800.1	0.974056	0.89427
extracellular	AT1G29660.1	| GDSL-like Lipase/Acylhydrolase superfamily protein | Chr1:10371955-10373624 FORWARD LENGTH=364 | 201606	4	4	3.988	40142.8	AT1G29660.1	5.84231	0.000179067	0.00167046	1	AT1G29660.1	4.76277	6.33898e-07	4.03132e-05	1	AT1G29660.1	4.30261	0.000881392	0.0192413	0.999989	AT1G29660.1	2.63962	1.64035e-05	0.000656397	1	AT1G29660.1	1.43703	0.00265047	0.11415	0.991783	AT1G29660.1	1.45715	0.0180512	0.278337	0.796007	AT1G29660.1	1.08942	0.453093	0.836111	0.103643	AT1G29660.1	1.22666	0.286053	0.796387	0.168082	AT1G29660.1	1.35785	0.224242
plastid	ATCG00160.1	| ribosomal protein S2 | ChrC:15013-15723 REVERSE LENGTH=236 | 201606	6	6	5.927	26905.8	ATCG00160.1	5.83315	0.00168127	0.00723475	0.997756	ATCG00160.1	4.81526	0.00495227	0.0131285	0.967084	ATCG00160.1	5.34601	0.00852832	0.054041	0.9419	ATCG00160.1	3.25381	0.00933693	0.032592	0.906831	ATCG00160.1	1.41524	0.405972	0.762925	0.11697	ATCG00160.1	0.982096	0.782768	0.953095	0.0567591	ATCG00160.1	0.85787	0.935983	0.982123	0.0505678	ATCG00160.1	1.21139	0.220956	0.778246	0.21145	ATCG00160.1	1.09112	0.41601
plastid	AT4G18810.1;AT4G18810.2	| NAD(P)-binding Rossmann-fold superfamily protein | Chr4:10322622-10325735 REVERSE LENGTH=596 | 201606 [AT4G18810.1,AT4G18810.2]	10	9	9.959	65469.7	AT4G18810.1;AT4G18810.2	5.82147	8.27796e-05	0.00107318	1	AT4G18810.1;AT4G18810.2	5.43645	9.15622e-05	0.00081566	1	AT4G18810.1;AT4G18810.2	5.24201	0.00147518	0.0230673	0.999788	AT4G18810.1;AT4G18810.2	3.50154	0.000566934	0.00510196	0.999973	AT4G18810.1;AT4G18810.2	1.46507	0.166858	0.590827	0.265207	AT4G18810.1;AT4G18810.2	1.46806	0.056292	0.460168	0.522322	AT4G18810.1;AT4G18810.2	1.17474	0.474185	0.839276	0.0984701	AT4G18810.1;AT4G18810.2	1.07082	0.136367	0.727088	0.305417	AT4G18810.1;AT4G18810.2	1.11054	0.327698
golgi	AT1G30530.1	| UDP-glucosyl transferase 78D1 | Chr1:10814917-10816374 FORWARD LENGTH=453 | 201606	6	3	5.949	50095.4	AT1G30530.1	5.81893	0.000352091	0.00253588	0.999998	AT1G30530.1	6.8734	0.000926528	0.00382814	0.999742	AT1G30530.1	4.62023	0.0161707	0.0763752	0.842792	AT1G30530.1	3.65444	0.00109743	0.00777844	0.999493	AT1G30530.1	2.60512	0.0168381	0.266072	0.809945	AT1G30530.1	2.05128	0.0399028	0.406385	0.610551	AT1G30530.1	1.2868	0.332365	0.80563	0.144204	AT1G30530.1	0.846587	0.50183	0.848569	0.093169	AT1G30530.1	1.25945	0.29401
plastid	AT1G74880.1	| NAD(P)H:plastoquinone dehydrogenase complex subunit O | Chr1:28130112-28131020 REVERSE LENGTH=158 | 201606	2	2	1.994	17657.9	AT1G74880.1	5.80993	5.162e-05	0.000797364	1	AT1G74880.1	5.57267	2.45925e-05	0.000355055	1	AT1G74880.1	5.0085	0.000191622	0.0102161	1	AT1G74880.1	3.16983	0.000119077	0.00204925	1	AT1G74880.1	1.39587	0.184024	0.602833	0.245594	AT1G74880.1	1.60297	0.0358182	0.387413	0.637823	AT1G74880.1	1.5442	0.0254223	0.690889	0.721019	AT1G74880.1	1.04257	0.734153	0.928141	0.0605719	AT1G74880.1	1.16001	0.244532
plastid	AT4G04020.1	| fibrillin | Chr4:1932161-1933546 FORWARD LENGTH=318 | 201606	6	4	6.941	34949.7	AT4G04020.1	5.79802	0.000305368	0.00230645	0.999999	AT4G04020.1	6.99445	2.86033e-05	0.000389097	1	AT4G04020.1	6.11026	0.000394612	0.0133534	1	AT4G04020.1	3.26916	0.00319629	0.0157858	0.986992	AT4G04020.1	2.04389	0.185591	0.604164	0.243931	AT4G04020.1	1.10808	0.775732	0.951501	0.0572217	AT4G04020.1	1.17226	0.908982	0.970486	0.0511514	AT4G04020.1	0.828947	0.23629	0.7799	0.199683	AT4G04020.1	0.9489	0.724048
plastid	AT1G60000.1	| RNA-binding (RRM/RBD/RNP motifs) family protein | Chr1:22093678-22094540 REVERSE LENGTH=258 | 201606	4	4	3.946	28498.6	AT1G60000.1	5.79561	3.72566e-05	0.000662127	1	AT1G60000.1	5.39072	3.7152e-05	0.000461629	1	AT1G60000.1	4.16173	0.0172479	0.0793794	0.829571	AT1G60000.1	3.40917	0.00015368	0.00232441	1	AT1G60000.1	1.43314	0.174051	0.598401	0.256662	AT1G60000.1	1.23711	0.29853	0.74527	0.160344	AT1G60000.1	1.0719	0.73452	0.916032	0.0602837	AT1G60000.1	1.07511	0.235077	0.7799	0.200574	AT1G60000.1	1.39259	0.182599
nucleus	AT3G29760.1;AT3G29760.2;AT3G29760.3;AT3G29760.4;AT3G29760.5	| Haloacid dehalogenase-like hydrolase (HAD) superfamily protein | Chr3:11590064-11591833 REVERSE LENGTH=465 | 201606 [AT3G29760.1,AT3G29760.2,AT3G29760.3,AT3G29760.4,AT3G29760.5]	2	2	1.976	51387.9	AT3G29760.1;AT3G29760.2;AT3G29760.3;AT3G29760.4;AT3G29760.5	5.75068	0.881175	0.90908	0.0519712	AT3G29760.1;AT3G29760.2;AT3G29760.3;AT3G29760.4;AT3G29760.5	8.49891	0.00108856	0.00431335	0.999509	AT3G29760.1;AT3G29760.2;AT3G29760.3;AT3G29760.4;AT3G29760.5	8.17024	0.00288237	0.0311002	0.996505	AT3G29760.1;AT3G29760.2;AT3G29760.3;AT3G29760.4;AT3G29760.5	4.54466	0.74096	0.81488	0.0597643	AT3G29760.1;AT3G29760.2;AT3G29760.3;AT3G29760.4;AT3G29760.5	0.351932	0.0610529	0.428428	0.501512	AT3G29760.1;AT3G29760.2;AT3G29760.3;AT3G29760.4;AT3G29760.5	4.69104	0.721531	0.934952	0.0613793	AT3G29760.1;AT3G29760.2;AT3G29760.3;AT3G29760.4;AT3G29760.5	36.2541	0.391931	0.81832	0.121489	AT3G29760.1;AT3G29760.2;AT3G29760.3;AT3G29760.4;AT3G29760.5	0.676638	0.332137	0.802699	0.145449	AT3G29760.1;AT3G29760.2;AT3G29760.3;AT3G29760.4;AT3G29760.5	0.703857	0.415851
plastid	AT1G74070.1;AT1G74070.2	| Cyclophilin-like peptidyl-prolyl cis-trans isomerase family protein | Chr1:27851749-27852861 REVERSE LENGTH=317 | 201606 [AT1G74070.1,AT1G74070.2]	3	3	2.991	34375	AT1G74070.1;AT1G74070.2	5.73376	0.0105116	0.0267768	0.890574	AT1G74070.1;AT1G74070.2	4.63954	0.0154038	0.0315826	0.82706	AT1G74070.1;AT1G74070.2	3.78162	0.0546397	0.154438	0.532245	AT1G74070.1;AT1G74070.2	2.18663	0.0764755	0.14855	0.444476	AT1G74070.1;AT1G74070.2	0.66401	0.974412	0.992142	0.0500905	AT1G74070.1;AT1G74070.2	0.98083	0.780854	0.953095	0.0568833	AT1G74070.1;AT1G74070.2	0.570883	0.721224	0.911243	0.061406	AT1G74070.1;AT1G74070.2	1.23585	0.0176059	0.494837	0.770888	AT1G74070.1;AT1G74070.2	1.51622	0.00597661
plastid	AT1G68830.1	| Serine/Threonine kinase domain protein | Chr1:25872654-25875473 REVERSE LENGTH=562 | 201606	3	2	2.823	63255	AT1G68830.1	5.73093	0.0231859	0.0492691	0.742132	AT1G68830.1	2.78511	0.294085	0.366938	0.162682	AT1G68830.1	2.53157	0.151244	0.285945	0.276565	AT1G68830.1	0.313911	0.401738	0.519925	0.118304	AT1G68830.1	0.91618	0.74039	0.914155	0.0598097	AT1G68830.1	0.657278	0.782018	0.953095	0.0568076	AT1G68830.1	0.662315	0.925978	0.978341	0.0507599	AT1G68830.1	2.0577	0.122191	0.71572	0.328821	AT1G68830.1	2.26378	0.00393098
plastid	AT2G30390.1;AT2G30390.2	| ferrochelatase 2 | Chr2:12951242-12953985 REVERSE LENGTH=512 | 201606 [AT2G30390.1,AT2G30390.2]	5	5	4.95	56620.4	AT2G30390.1;AT2G30390.2	5.72284	0.00307509	0.0109437	0.98813	AT2G30390.1;AT2G30390.2	4.60535	0.00239234	0.00762248	0.993721	AT2G30390.1;AT2G30390.2	3.16596	0.0194036	0.0844498	0.804056	AT2G30390.1;AT2G30390.2	2.34041	0.0182802	0.0523381	0.79343	AT2G30390.1;AT2G30390.2	1.13653	0.523101	0.821761	0.0880276	AT2G30390.1;AT2G30390.2	1.22306	0.513711	0.861664	0.0898788	AT2G30390.1;AT2G30390.2	1.29198	0.386493	0.817755	0.123315	AT2G30390.1;AT2G30390.2	1.24265	0.363267	0.803914	0.132783	AT2G30390.1;AT2G30390.2	1.80761	0.0430631
cytosol	AT5G60540.1	| pyridoxine biosynthesis 2 | Chr5:24336874-24338647 REVERSE LENGTH=255 | 201606	3	3	2.94	27438.2	AT5G60540.1	5.71234	0.000246675	0.0020122	1	AT5G60540.1	6.74152	0.0059647	0.0150584	0.95379	AT5G60540.1	5.9589	9.22496e-05	0.00710322	1	AT5G60540.1	2.43062	0.0133901	0.0416125	0.852269	AT5G60540.1	1.69636	0.314024	0.700374	0.152608	AT5G60540.1	1.43293	0.674059	0.923812	0.0659608	AT5G60540.1	1.99859	0.165295	0.763824	0.267132	AT5G60540.1	0.847337	0.885188	0.973482	0.0518874	AT5G60540.1	0.958623	0.743417
plastid	AT1G11430.1	| plastid developmental protein DAG | Chr1:3847273-3848938 FORWARD LENGTH=232 | 201606	3	3	2.991	26201.5	AT1G11430.1	5.70806	0.0273557	0.056057	0.703788	AT1G11430.1	5.44057	0.0952027	0.142216	0.390682	AT1G11430.1	5.39697	0.0297356	0.108795	0.699216	AT1G11430.1	2.82459	0.0506322	0.109588	0.549563	AT1G11430.1	1.58358	0.622229	0.86117	0.0721122	AT1G11430.1	1.33264	0.694635	0.927762	0.0638598	AT1G11430.1	1.69896	0.428191	0.831072	0.110356	AT1G11430.1	1.04917	0.745629	0.933955	0.059634	AT1G11430.1	1.05764	0.886122
plastid	AT1G32550.1;AT1G32550.2	| 2Fe-2S ferredoxin-like superfamily protein | Chr1:11771969-11774117 REVERSE LENGTH=181 | 201606 [AT1G32550.1,AT1G32550.2]	2	2	1.994	20376.8	AT1G32550.1;AT1G32550.2	5.69831	1.57578e-05	0.00039644	1	AT1G32550.1;AT1G32550.2	5.68866	1.32055e-05	0.000243153	1	AT1G32550.1;AT1G32550.2	3.60543	0.147673	0.281709	0.281683	AT1G32550.1;AT1G32550.2	2.48963	0.00123987	0.008402	0.999201	AT1G32550.1;AT1G32550.2	1.19007	0.192858	0.610276	0.236472	AT1G32550.1;AT1G32550.2	1.23759	0.171017	0.655931	0.260206	AT1G32550.1;AT1G32550.2	0.864511	0.45335	0.83627	0.103577	AT1G32550.1;AT1G32550.2	1.0017	0.987785	0.997368	0.0500212	AT1G32550.1;AT1G32550.2	1.58048	0.198004
cytosol	AT5G10470.1;AT5G10470.2	| kinesin like protein for actin based chloroplast movement 1 | Chr5:3290121-3297248 REVERSE LENGTH=1273 | 201606 [AT5G10470.1,AT5G10470.2]	16	10	15.935	141040	AT5G10470.1;AT5G10470.2	5.68478	0.00066633	0.0038091	0.99994	AT5G10470.1;AT5G10470.2	4.34038	3.50462e-05	0.000448627	1	AT5G10470.1;AT5G10470.2	2.43876	0.0187787	0.0830576	0.811321	AT5G10470.1;AT5G10470.2	2.11717	0.000149802	0.00229305	1	AT5G10470.1;AT5G10470.2	1.80878	0.00494925	0.161009	0.967122	AT5G10470.1;AT5G10470.2	1.22371	0.229703	0.705349	0.204048	AT5G10470.1;AT5G10470.2	1.17633	0.316438	0.801364	0.151456	AT5G10470.1;AT5G10470.2	1.30974	0.302503	0.796387	0.159392	AT5G10470.1;AT5G10470.2	2.33101	0.0331615
plastid	AT4G04350.1	| tRNA synthetase class I (I%2C L%2C M and V) family protein | Chr4:2128129-2133030 FORWARD LENGTH=973 | 201606	11	11	11.812	111036	AT4G04350.1	5.6667	0.000117912	0.00129984	1	AT4G04350.1	6.12224	1.78281e-05	0.000294164	1	AT4G04350.1	5.23662	0.000159716	0.00919771	1	AT4G04350.1	3.43906	7.86646e-05	0.0015864	1	AT4G04350.1	1.51732	0.0542932	0.41299	0.531611	AT4G04350.1	1.64302	0.0200262	0.294995	0.774336	AT4G04350.1	1.45256	0.0850295	0.742917	0.418181	AT4G04350.1	0.925592	0.486345	0.844434	0.0965732	AT4G04350.1	1.08213	0.660709
plastid	AT4G34830.1	| Pentatricopeptide repeat (PPR) superfamily protein | Chr4:16599976-16605994 REVERSE LENGTH=1089 | 201606	8	7	7.926	119775	AT4G34830.1	5.64132	1.61988e-05	0.000402393	1	AT4G34830.1	5.55064	0.00276929	0.00847802	0.990817	AT4G34830.1	8.98601	0.000398719	0.0133534	1	AT4G34830.1	5.34914	4.49387e-05	0.0011957	1	AT4G34830.1	2.48715	0.0744435	0.45733	0.451221	AT4G34830.1	1.67922	0.0407055	0.409635	0.605486	AT4G34830.1	1.51324	0.0230649	0.666534	0.743313	AT4G34830.1	1.01634	0.739874	0.93115	0.060098	AT4G34830.1	0.627789	0.0355609
plastid	AT4G17560.1	| Ribosomal protein L19 family protein | Chr4:9780343-9781752 FORWARD LENGTH=225 | 201606	3	1	2.899	25519.3	AT4G17560.1	5.61584	0.00101567	0.00515646	0.999625	AT4G17560.1	5.30703	0.00113568	0.00446366	0.999422	AT4G17560.1	4.9974	0.00604423	0.045305	0.971497	AT4G17560.1	3.11652	0.00706225	0.0270373	0.9387	AT4G17560.1	1.28712	0.286782	0.683184	0.166647	AT4G17560.1	1.19743	0.395011	0.798299	0.120474	AT4G17560.1	1.12762	0.578842	0.871193	0.07833	AT4G17560.1	1.05819	0.166303	0.745213	0.264902	AT4G17560.1	1.12375	0.112007
mitochondrion	AT4G01100.1;AT4G01100.2;AT4G01100.3;AT1G14560.1;AT1G14560.2;AT4G26180.1;AT4G26180.2	| adenine nucleotide transporter 1 | Chr4:477411-479590 FORWARD LENGTH=352 | 201606 [AT4G01100.1,AT4G01100.2]	6	6	5.966	38325.2	AT4G01100.1;AT4G01100.2;AT4G01100.3;AT1G14560.1;AT1G14560.2;AT4G26180.1;AT4G26180.2	5.61368	0.000395908	0.0027524	0.999996	AT4G01100.1;AT4G01100.2;AT4G01100.3;AT1G14560.1;AT1G14560.2;AT4G26180.1;AT4G26180.2	5.36414	0.000445679	0.00228091	0.999993	AT4G01100.1;AT4G01100.2;AT4G01100.3;AT1G14560.1;AT1G14560.2;AT4G26180.1;AT4G26180.2	4.39412	0.00469249	0.0393627	0.984686	AT4G01100.1;AT4G01100.2;AT4G01100.3;AT1G14560.1;AT1G14560.2;AT4G26180.1;AT4G26180.2	2.94599	0.00302129	0.0151773	0.988622	AT4G01100.1;AT4G01100.2;AT4G01100.3;AT1G14560.1;AT1G14560.2;AT4G26180.1;AT4G26180.2	2.43905	0.00611066	0.178473	0.951813	AT4G01100.1;AT4G01100.2;AT4G01100.3;AT1G14560.1;AT1G14560.2;AT4G26180.1;AT4G26180.2	1.86586	0.0369775	0.391898	0.629817	AT4G01100.1;AT4G01100.2;AT4G01100.3;AT1G14560.1;AT1G14560.2;AT4G26180.1;AT4G26180.2	2.67463	0.0523731	0.742917	0.540869	AT4G01100.1;AT4G01100.2;AT4G01100.3;AT1G14560.1;AT1G14560.2;AT4G26180.1;AT4G26180.2	1.04652	0.362906	0.803914	0.13292	AT4G01100.1;AT4G01100.2;AT4G01100.3;AT1G14560.1;AT1G14560.2;AT4G26180.1;AT4G26180.2	1.27754	0.0396529
plastid	AT1G14150.1	| PsbQ-like 2 | Chr1:4839885-4840632 FORWARD LENGTH=190 | 201606	6	4	5.82	22158.1	AT1G14150.1	5.60355	0.025686	0.0533455	0.718615	AT1G14150.1	8.47104	0.00134398	0.00494935	0.998935	AT1G14150.1	3.64994	0.12074	0.249735	0.326816	AT1G14150.1	1.99092	0.273074	0.393357	0.17453	AT1G14150.1	1.14966	0.667418	0.882311	0.0666784	AT1G14150.1	1.41399	0.610975	0.900776	0.0736248	AT1G14150.1	1.35771	0.722268	0.911263	0.0613153	AT1G14150.1	0.661494	0.233298	0.7799	0.201892	AT1G14150.1	1.53524	0.472309
plastid	AT4G29670.1;AT4G29670.2	| atypical CYS HIS rich thioredoxin 2 | Chr4:14535772-14537108 REVERSE LENGTH=235 | 201606 [AT4G29670.1,AT4G29670.2]	2	2	1.994	25843.7	AT4G29670.1;AT4G29670.2	5.56303	2.57688e-07	4.51577e-05	1	AT4G29670.1;AT4G29670.2	5.47037	3.33425e-06	0.000103955	1	AT4G29670.1;AT4G29670.2	2.27551	0.413547	0.553502	0.109923	AT4G29670.1;AT4G29670.2	2.91395	1.17079e-05	0.000577667	1	AT4G29670.1;AT4G29670.2	1.64449	0.00109127	0.0946254	0.999504	AT4G29670.1;AT4G29670.2	1.38526	0.00431588	0.139949	0.9749	AT4G29670.1;AT4G29670.2	1.17743	0.0722602	0.742917	0.458703	AT4G29670.1;AT4G29670.2	1.01694	0.765816	0.939658	0.0581036	AT4G29670.1;AT4G29670.2	2.44473	0.0552411
plastid	AT4G26530.1;AT4G26530.2;AT4G26530.3	| Aldolase superfamily protein | Chr4:13391566-13392937 FORWARD LENGTH=358 | 201606 [AT4G26530.1,AT4G26530.2,AT4G26530.3]	10	6	12.875	38294.5	AT4G26530.1;AT4G26530.2;AT4G26530.3	5.54695	0.00615285	0.0180701	0.95124	AT4G26530.1;AT4G26530.2;AT4G26530.3	5.1563	0.00752492	0.017991	0.932235	AT4G26530.1;AT4G26530.2;AT4G26530.3	4.0565	0.0385553	0.126249	0.629012	AT4G26530.1;AT4G26530.2;AT4G26530.3	2.1906	0.0692829	0.137376	0.469325	AT4G26530.1;AT4G26530.2;AT4G26530.3	1.3944	0.267064	0.667267	0.178182	AT4G26530.1;AT4G26530.2;AT4G26530.3	1.32998	0.307762	0.749099	0.155659	AT4G26530.1;AT4G26530.2;AT4G26530.3	1.38195	0.283586	0.789232	0.168432	AT4G26530.1;AT4G26530.2;AT4G26530.3	1.07576	0.25949	0.785351	0.183836	AT4G26530.1;AT4G26530.2;AT4G26530.3	1.36742	0.0435211
plastid	AT3G43540.1;AT3G43540.2	| initiation factor 4F subunit (DUF1350) | Chr3:15430770-15433035 FORWARD LENGTH=373 | 201606 [AT3G43540.1,AT3G43540.2]	4	4	3.987	40980.1	AT3G43540.1;AT3G43540.2	5.54495	0.0191231	0.0423274	0.784092	AT3G43540.1;AT3G43540.2	7.73166	0.00441495	0.0120758	0.973719	AT3G43540.1;AT3G43540.2	3.16999	0.0962606	0.216172	0.381581	AT3G43540.1;AT3G43540.2	1.54406	0.212038	0.323305	0.218573	AT3G43540.1;AT3G43540.2	0.889474	0.904249	0.971439	0.0512751	AT3G43540.1;AT3G43540.2	1.26628	0.69472	0.927762	0.0638515	AT3G43540.1;AT3G43540.2	1.13776	0.464197	0.838412	0.100865	AT3G43540.1;AT3G43540.2	0.717174	0.16391	0.743631	0.267777	AT3G43540.1;AT3G43540.2	1.7492	0.203169
plastid	AT3G59780.1	| Rhodanese/Cell cycle control phosphatase superfamily protein | Chr3:22086906-22090324 FORWARD LENGTH=686 | 201606	10	9	9.961	73936.1	AT3G59780.1	5.5391	1.22072e-05	0.000346575	1	AT3G59780.1	4.64205	7.96904e-07	4.4504e-05	1	AT3G59780.1	4.01437	0.000455657	0.0140209	1	AT3G59780.1	2.15777	0.000331836	0.0036034	0.999999	AT3G59780.1	1.29117	0.138712	0.554631	0.304191	AT3G59780.1	1.13608	0.373998	0.787347	0.127684	AT3G59780.1	0.942768	0.555065	0.861558	0.0822111	AT3G59780.1	1.19324	0.086465	0.677793	0.406409	AT3G59780.1	1.37982	0.0621686
plastid	AT3G24590.1;AT3G24590.2	| plastidic type i signal peptidase 1 | Chr3:8970694-8972020 FORWARD LENGTH=291 | 201606 [AT3G24590.1,AT3G24590.2]	6	5	6.913	32554.6	AT3G24590.1;AT3G24590.2	5.53733	1.0092e-05	0.000318555	1	AT3G24590.1;AT3G24590.2	5.46672	6.46037e-05	0.000637506	1	AT3G24590.1;AT3G24590.2	3.26907	0.13939	0.272873	0.29426	AT3G24590.1;AT3G24590.2	4.11711	4.54506e-05	0.00119674	1	AT3G24590.1;AT3G24590.2	2.12381	0.0194569	0.276975	0.780456	AT3G24590.1;AT3G24590.2	1.62709	0.0240715	0.327984	0.733614	AT3G24590.1;AT3G24590.2	1.25247	0.0967232	0.742917	0.386876	AT3G24590.1;AT3G24590.2	1.01292	0.80781	0.951298	0.0553837	AT3G24590.1;AT3G24590.2	1.69386	0.139892
nucleus	AT1G24300.1;AT1G24300.2	| GYF domain-containing protein | Chr1:8614515-8620420 REVERSE LENGTH=1495 | 201606 [AT1G24300.1,AT1G24300.2]	16	11	15.602	166272	AT1G24300.1;AT1G24300.2	5.50453	0.235141	0.318355	0.199904	AT1G24300.1;AT1G24300.2	1.26046	0.0543592	0.0890853	0.531299	AT1G24300.1;AT1G24300.2	1.34911	0.0964837	0.216324	0.381002	AT1G24300.1;AT1G24300.2	1.40356	0.00102503	0.0074492	0.999611	AT1G24300.1;AT1G24300.2	1.02071	0.668591	0.882311	0.0665502	AT1G24300.1;AT1G24300.2	1.10498	0.298577	0.74527	0.16032	AT1G24300.1;AT1G24300.2	0.983106	0.775353	0.929487	0.0572471	AT1G24300.1;AT1G24300.2	4.36707	0.265588	0.787478	0.180012	AT1G24300.1;AT1G24300.2	4.08012	0.384353
plastid	AT5G57040.1	| Lactoylglutathione lyase / glyoxalase I family protein | Chr5:23084035-23085116 REVERSE LENGTH=197 | 201606	3	3	2.991	22248.1	AT5G57040.1	5.50429	7.59385e-05	0.00101558	1	AT5G57040.1	5.67415	0.00108199	0.00430256	0.99952	AT5G57040.1	3.28647	0.00351868	0.0347516	0.993279	AT5G57040.1	2.17219	0.00129375	0.00865111	0.999069	AT5G57040.1	1.49605	0.0744132	0.45733	0.451323	AT5G57040.1	1.52099	0.167854	0.651668	0.263994	AT5G57040.1	1.32869	0.264102	0.789232	0.180029	AT5G57040.1	0.970064	0.960057	0.994911	0.0502265	AT5G57040.1	1.67483	0.0311578
endoplasmic reticulum	AT5G13930.1	| Chalcone and stilbene synthase family protein | Chr5:4488762-4490035 FORWARD LENGTH=395 | 201606	7	7	7.927	43116.3	AT5G13930.1	5.5025	0.00525056	0.0161521	0.963257	AT5G13930.1	7.35877	0.0033954	0.00984336	0.985039	AT5G13930.1	8.92479	0.00400262	0.0365069	0.990121	AT5G13930.1	12.0328	0.000465185	0.0044774	0.999991	AT5G13930.1	8.04861	0.00404041	0.136889	0.978101	AT5G13930.1	6.23874	0.00274642	0.119293	0.991006	AT5G13930.1	2.04822	0.0490834	0.742917	0.557551	AT5G13930.1	0.747748	0.329271	0.802699	0.146711	AT5G13930.1	0.616542	0.0606548
plastid	AT1G74970.1	| ribosomal protein S9 | Chr1:28157761-28159202 REVERSE LENGTH=208 | 201606	4	3	3.982	22578	AT1G74970.1	5.49592	0.000142041	0.00145829	1	AT1G74970.1	3.95254	0.00248918	0.00784739	0.993021	AT1G74970.1	3.22534	0.0164573	0.077226	0.839246	AT1G74970.1	3.695	0.00114387	0.0079591	0.999407	AT1G74970.1	2.07243	0.0326233	0.343966	0.661085	AT1G74970.1	1.98835	0.00822054	0.189894	0.922472	AT1G74970.1	1.64852	0.0542732	0.742917	0.531706	AT1G74970.1	1.39048	0.120026	0.71572	0.332696	AT1G74970.1	1.70398	0.0597802
plastid	AT2G40490.1	| Uroporphyrinogen decarboxylase | Chr2:16912961-16914988 FORWARD LENGTH=394 | 201606	13	13	16.84	43580.4	AT2G40490.1	5.49543	2.51073e-05	0.000538378	1	AT2G40490.1	5.74153	7.81105e-06	0.000180427	1	AT2G40490.1	5.21692	0.000299375	0.0119797	1	AT2G40490.1	3.61632	4.70454e-05	0.00122607	1	AT2G40490.1	1.79212	0.0620835	0.428428	0.497232	AT2G40490.1	1.62036	0.01193	0.229034	0.871388	AT2G40490.1	1.12181	0.356409	0.810716	0.134271	AT2G40490.1	0.957137	0.510235	0.849575	0.0914054	AT2G40490.1	1.05339	0.634646
nucleus	AT5G66880.1;AT5G66880.2	| sucrose nonfermenting 1(SNF1)-related protein kinase 2.3 | Chr5:26710697-26712732 FORWARD LENGTH=361 | 201606 [AT5G66880.1,AT5G66880.2]	2	1	1.993	41086.2	AT5G66880.1;AT5G66880.2	5.49519	0.0226625	0.0484114	0.747269	AT5G66880.1;AT5G66880.2	7.60725	0.00639069	0.0158581	0.947991	AT5G66880.1;AT5G66880.2	7.20164	0.0322935	0.114526	0.677266	AT5G66880.1;AT5G66880.2	11.1282	0.00102606	0.0074492	0.99961	AT5G66880.1;AT5G66880.2	4.997	0.0127367	0.236233	0.860741	AT5G66880.1;AT5G66880.2	3.06467	0.0155956	0.254846	0.824731	AT5G66880.1;AT5G66880.2	1.1335	0.617895	0.880641	0.0726867	AT5G66880.1;AT5G66880.2	0.722362	0.369232	0.803914	0.130557	AT5G66880.1;AT5G66880.2	0.763047	0.627968
plastid	AT5G19940.1;AT5G19940.2	| Plastid-lipid associated protein PAP / fibrillin family protein | Chr5:6739693-6740661 FORWARD LENGTH=239 | 201606 [AT5G19940.1,AT5G19940.2]	5	4	5.975	26483.1	AT5G19940.1;AT5G19940.2	5.49374	3.37989e-05	0.000629179	1	AT5G19940.1;AT5G19940.2	4.73443	7.49513e-06	0.000176344	1	AT5G19940.1;AT5G19940.2	3.39731	0.000590148	0.0155461	0.999999	AT5G19940.1;AT5G19940.2	3.14422	0.000159347	0.00236784	1	AT5G19940.1;AT5G19940.2	1.56894	0.155881	0.581915	0.279274	AT5G19940.1;AT5G19940.2	1.4062	0.00486097	0.146174	0.968236	AT5G19940.1;AT5G19940.2	1.29268	0.0125123	0.594609	0.863682	AT5G19940.1;AT5G19940.2	1.16038	0.23638	0.7799	0.199618	AT5G19940.1;AT5G19940.2	1.61709	0.0190492
plastid	AT1G75460.1	| ATP-dependent protease La (LON) domain protein | Chr1:28327986-28328822 FORWARD LENGTH=278 | 201606	2	1	1.994	31335.9	AT1G75460.1	5.46734	1.20317e-05	0.000343513	1	AT1G75460.1	5.40614	1.57185e-06	6.85893e-05	1	AT1G75460.1	4.96728	0.000110694	0.00792323	1	AT1G75460.1	3.10103	7.43936e-05	0.00152447	1	AT1G75460.1	1.41857	0.0111966	0.2282	0.881238	AT1G75460.1	1.42844	0.0432409	0.420977	0.590066	AT1G75460.1	1.10738	0.470343	0.839276	0.0993798	AT1G75460.1	1.01132	0.946005	0.989227	0.0504143	AT1G75460.1	1.10067	0.422395
plasma membrane	AT4G29900.1;AT4G29900.2	| autoinhibited Ca(2+)-ATPase 10 | Chr4:14611225-14618775 REVERSE LENGTH=1069 | 201606 [AT4G29900.1,AT4G29900.2]	8	7	7.836	116860	AT4G29900.1;AT4G29900.2	5.46499	0.00192063	0.00790978	0.996626	AT4G29900.1;AT4G29900.2	4.69006	0.00339387	0.00984336	0.985054	AT4G29900.1;AT4G29900.2	2.91166	0.0236693	0.0949164	0.757379	AT4G29900.1;AT4G29900.2	1.31193	0.327795	0.448051	0.146227	AT4G29900.1;AT4G29900.2	0.807347	0.677062	0.885793	0.0656427	AT4G29900.1;AT4G29900.2	0.698432	0.400764	0.801295	0.118614	AT4G29900.1;AT4G29900.2	0.634342	0.285586	0.789232	0.167311	AT4G29900.1;AT4G29900.2	1.16523	0.357196	0.803914	0.135113	AT4G29900.1;AT4G29900.2	1.87693	0.00433302
plastid	AT1G20020.1	| ferredoxin-NADP[+]-oxidoreductase 2 | Chr1:6942851-6944868 FORWARD LENGTH=369 | 201606	18	5	22.727	41169	AT1G20020.1	5.45998	0.00279956	0.0102503	0.990563	AT1G20020.1	4.90377	0.00236398	0.00756537	0.993919	AT1G20020.1	4.56719	0.0101209	0.059947	0.921228	AT1G20020.1	3.06317	0.00817028	0.0298066	0.923178	AT1G20020.1	1.21535	0.687565	0.890244	0.0645612	AT1G20020.1	1.30328	0.342291	0.766985	0.139964	AT1G20020.1	0.869445	0.731013	0.914351	0.0605731	AT1G20020.1	1.11342	0.643716	0.899768	0.069863	AT1G20020.1	1.19548	0.476186
plastid	AT5G35170.1;AT5G35170.2	| adenylate kinase family protein | Chr5:13419278-13423482 FORWARD LENGTH=588 | 201606 [AT5G35170.1,AT5G35170.2]	6	6	5.972	65741.2	AT5G35170.1;AT5G35170.2	5.44004	0.026234	0.0542618	0.713674	AT5G35170.1;AT5G35170.2	2.14822	0.0116259	0.0252924	0.875453	AT5G35170.1;AT5G35170.2	1.37955	0.162295	0.29905	0.26176	AT5G35170.1;AT5G35170.2	0.958149	0.950388	0.966941	0.0503406	AT5G35170.1;AT5G35170.2	0.711009	0.142508	0.556972	0.29834	AT5G35170.1;AT5G35170.2	1.01681	0.962572	0.992834	0.0501937	AT5G35170.1;AT5G35170.2	0.878637	0.616195	0.8798	0.0729149	AT5G35170.1;AT5G35170.2	2.53235	0.114713	0.711464	0.34258	AT5G35170.1;AT5G35170.2	3.94334	0.0521905
plastid	AT5G54770.1	| thiazole biosynthetic enzyme%2C chloroplast (ARA6) (THI1) (THI4) | Chr5:22246634-22247891 FORWARD LENGTH=349 | 201606	22	21	26.78	36664.4	AT5G54770.1	5.39955	1.89215e-07	4.51577e-05	1	AT5G54770.1	5.39603	3.80253e-07	3.27019e-05	1	AT5G54770.1	4.48236	0.00225492	0.0277897	0.998594	AT5G54770.1	1.97863	0.00264895	0.0140816	0.991796	AT5G54770.1	1.15035	0.341861	0.720973	0.140144	AT5G54770.1	0.916016	0.587775	0.893531	0.0769621	AT5G54770.1	0.766356	0.362419	0.81327	0.131959	AT5G54770.1	1.00065	0.965651	0.99659	0.0501674	AT5G54770.1	1.20462	0.248984
plastid	AT1G62180.1	| 5'adenylylphosphosulfate reductase 2 | Chr1:22975794-22977465 REVERSE LENGTH=454 | 201606	5	3	4.971	50656.3	AT1G62180.1	5.38434	0.00774267	0.0214198	0.929182	AT1G62180.1	5.05575	0.00891894	0.0205865	0.912674	AT1G62180.1	4.3385	0.0568776	0.15882	0.521146	AT1G62180.1	2.77286	0.0363821	0.0860773	0.633901	AT1G62180.1	1.14187	0.394248	0.755886	0.120724	AT1G62180.1	0.977553	0.582666	0.89265	0.0777386	AT1G62180.1	0.497583	0.460488	0.838412	0.101779	AT1G62180.1	1.06499	0.287672	0.796387	0.167193	AT1G62180.1	1.24106	0.313244
plastid	AT4G18480.1	| P-loop containing nucleoside triphosphate hydrolases superfamily protein | Chr4:10201897-10203361 REVERSE LENGTH=424 | 201606	16	7	18.84	46270.8	AT4G18480.1	5.38021	0.00019199	0.00171486	1	AT4G18480.1	4.56485	1.57909e-06	6.85893e-05	1	AT4G18480.1	3.92044	0.00449045	0.0389428	0.986382	AT4G18480.1	2.6674	3.91908e-05	0.0011055	1	AT4G18480.1	1.64296	0.0012123	0.0946254	0.999264	AT4G18480.1	1.25896	0.0440831	0.424828	0.58513	AT4G18480.1	1.42782	0.00276891	0.44641	0.99082	AT4G18480.1	1.17862	0.357328	0.803914	0.135061	AT4G18480.1	1.37235	0.225472
plastid	AT3G63140.1	| chloroplast stem-loop binding protein of 41 kDa | Chr3:23327006-23328620 REVERSE LENGTH=406 | 201606	13	12	16.756	43930.7	AT3G63140.1	5.35103	1.51094e-05	0.000392391	1	AT3G63140.1	5.01421	1.02096e-05	0.000204271	1	AT3G63140.1	2.79314	0.0025819	0.0295523	0.997641	AT3G63140.1	2.04868	0.000300287	0.00339879	0.999999	AT3G63140.1	0.767832	0.033767	0.349645	0.652547	AT3G63140.1	1.04392	0.686669	0.926876	0.0646516	AT3G63140.1	0.793225	0.130534	0.749717	0.317549	AT3G63140.1	1.06717	0.435902	0.8255	0.109226	AT3G63140.1	1.91577	0.0033793
plastid	AT5G17050.1	| UDP-glucosyl transferase 78D2 | Chr5:5607828-5609392 REVERSE LENGTH=460 | 201606	5	3	4.974	50486.3	AT5G17050.1	5.34882	0.0056546	0.0170342	0.957947	AT5G17050.1	7.31344	0.00742506	0.0177907	0.933633	AT5G17050.1	4.29623	0.0407394	0.131306	0.613794	AT5G17050.1	4.34778	0.00989201	0.0336876	0.899114	AT5G17050.1	3.23613	0.0358067	0.353533	0.637904	AT5G17050.1	1.48775	0.487259	0.851192	0.0954776	AT5G17050.1	1.3709	0.303812	0.795303	0.157636	AT5G17050.1	0.731368	0.376349	0.804409	0.127976	AT5G17050.1	1.245	0.273437
plastid	AT3G26085.4	| CAAX amino terminal protease family protein | Chr3:9531082-9532397 FORWARD LENGTH=272 | 201606	2	2	1.993	29512.5	AT3G26085.4	5.34727	0.0154009	0.0359518	0.827096	AT3G26085.4	4.87966	0.0211782	0.0406142	0.762256	AT3G26085.4	2.59582	0.69068	0.786486	0.0630659	AT3G26085.4	2.60026	0.0706002	0.139527	0.464564	AT3G26085.4	0.880348	0.989813	0.998409	0.0500143	AT3G26085.4	2.04217	0.436186	0.816765	0.108125	AT3G26085.4	0.749731	0.819974	0.94481	0.0545887	AT3G26085.4	1.09583	0.481537	0.843975	0.0976728	AT3G26085.4	2.05995	0.18318
plastid	AT1G50450.1	| Saccharopine dehydrogenase | Chr1:18687902-18690348 REVERSE LENGTH=428 | 201606	5	4	5.854	46559.5	AT1G50450.1	5.32534	2.21128e-05	0.000493702	1	AT1G50450.1	4.89775	5.17695e-05	0.000557399	1	AT1G50450.1	4.19174	0.000699473	0.0166588	0.999998	AT1G50450.1	3.08369	0.000614755	0.00534049	0.99996	AT1G50450.1	1.03733	0.974626	0.992142	0.050089	AT1G50450.1	1.3128	0.123924	0.601513	0.329169	AT1G50450.1	1.32992	0.340632	0.806284	0.140659	AT1G50450.1	1.0873	0.193882	0.757107	0.235332	AT1G50450.1	1.27044	0.0224256
plastid	AT1G16080.1	| nuclear protein | Chr1:5514394-5515761 FORWARD LENGTH=313 | 201606	14	14	14.845	34130.5	AT1G16080.1	5.31865	3.93881e-05	0.000687266	1	AT1G16080.1	4.95219	6.20146e-06	0.000156795	1	AT1G16080.1	4.31707	0.000306063	0.0120108	1	AT1G16080.1	2.88161	4.78249e-05	0.00122697	1	AT1G16080.1	1.58101	0.00281168	0.115276	0.990461	AT1G16080.1	1.49346	0.00695063	0.172308	0.940254	AT1G16080.1	1.21625	0.0506875	0.742917	0.549282	AT1G16080.1	1.074	0.478937	0.843975	0.0982762	AT1G16080.1	1.232	0.14024
plastid	AT1G10760.1;AT1G10760.2;AT1G10760.3;AT4G24450.1;AT4G24450.2;AT4G24450.3	| Pyruvate phosphate dikinase%2C PEP/pyruvate binding domain-containing protein | Chr1:3581210-3590043 REVERSE LENGTH=1399 | 201606 [AT1G10760.1,AT1G10760.2,AT1G10760.3]	22	22	21.786	156586	AT1G10760.1;AT1G10760.2;AT1G10760.3;AT4G24450.1;AT4G24450.2;AT4G24450.3	5.31027	2.98871e-06	0.000168708	1	AT1G10760.1;AT1G10760.2;AT1G10760.3;AT4G24450.1;AT4G24450.2;AT4G24450.3	4.56668	6.13912e-07	4.02469e-05	1	AT1G10760.1;AT1G10760.2;AT1G10760.3;AT4G24450.1;AT4G24450.2;AT4G24450.3	3.67741	0.000236021	0.0108951	1	AT1G10760.1;AT1G10760.2;AT1G10760.3;AT4G24450.1;AT4G24450.2;AT4G24450.3	2.17982	4.00402e-05	0.0011055	1	AT1G10760.1;AT1G10760.2;AT1G10760.3;AT4G24450.1;AT4G24450.2;AT4G24450.3	1.5058	0.0496178	0.397099	0.554767	AT1G10760.1;AT1G10760.2;AT1G10760.3;AT4G24450.1;AT4G24450.2;AT4G24450.3	1.32697	0.0965298	0.543863	0.387356	AT1G10760.1;AT1G10760.2;AT1G10760.3;AT4G24450.1;AT4G24450.2;AT4G24450.3	1.49046	0.0409469	0.742917	0.60398	AT1G10760.1;AT1G10760.2;AT1G10760.3;AT4G24450.1;AT4G24450.2;AT4G24450.3	1.16283	0.0381046	0.590381	0.601368	AT1G10760.1;AT1G10760.2;AT1G10760.3;AT4G24450.1;AT4G24450.2;AT4G24450.3	1.44402	0.0125556
plastid	AT5G58330.1;AT5G58330.2;AT5G58330.3	| lactate/malate dehydrogenase family protein | Chr5:23580010-23582287 REVERSE LENGTH=443 | 201606 [AT5G58330.1,AT5G58330.2]	11	11	10.936	48317.3	AT5G58330.1;AT5G58330.2;AT5G58330.3	5.30738	5.65344e-06	0.000219464	1	AT5G58330.1;AT5G58330.2;AT5G58330.3	5.17168	4.92186e-06	0.000131788	1	AT5G58330.1;AT5G58330.2;AT5G58330.3	4.39511	0.00156812	0.0238598	0.999714	AT5G58330.1;AT5G58330.2;AT5G58330.3	3.39809	2.66457e-05	0.000875291	1	AT5G58330.1;AT5G58330.2;AT5G58330.3	1.6405	0.0500936	0.398397	0.552313	AT5G58330.1;AT5G58330.2;AT5G58330.3	1.45756	0.0179218	0.278337	0.797471	AT5G58330.1;AT5G58330.2;AT5G58330.3	1.02851	0.766927	0.92735	0.0578248	AT5G58330.1;AT5G58330.2;AT5G58330.3	1.02624	0.53498	0.863246	0.0865341	AT5G58330.1;AT5G58330.2;AT5G58330.3	1.20756	0.201315
plastid	AT5G51820.1	| phosphoglucomutase | Chr5:21063531-21067933 REVERSE LENGTH=623 | 201606	23	22	25.756	67991.7	AT5G51820.1	5.30007	3.03713e-05	0.000600571	1	AT5G51820.1	4.45609	5.48982e-05	0.000577625	1	AT5G51820.1	3.68139	0.00330703	0.0336337	0.994473	AT5G51820.1	2.37798	0.000938375	0.00700976	0.999728	AT5G51820.1	1.19154	0.354131	0.729932	0.135164	AT5G51820.1	1.21129	0.15935	0.641694	0.274686	AT5G51820.1	0.979052	0.963411	0.987675	0.0501851	AT5G51820.1	1.1894	0.00080231	0.233038	0.999035	AT5G51820.1	1.43969	0.030955
plastid	AT3G47860.1	| chloroplastic lipocalin | Chr3:17656778-17658269 REVERSE LENGTH=353 | 201606	5	4	4.975	39116.9	AT3G47860.1	5.2972	0.00228488	0.00885719	0.994458	AT3G47860.1	5.37942	0.00091698	0.00379796	0.999752	AT3G47860.1	3.39838	0.0157134	0.0755385	0.848495	AT3G47860.1	2.16962	0.0215204	0.059213	0.758744	AT3G47860.1	0.948526	0.926214	0.977984	0.0507551	AT3G47860.1	0.943825	0.99035	0.995988	0.0500129	AT3G47860.1	0.767856	0.525614	0.851525	0.0875436	AT3G47860.1	0.984716	0.766301	0.939658	0.0580686	AT3G47860.1	1.55874	0.0781398
extracellular	AT5G09530.1	| hydroxyproline-rich glycoprotein family protein | Chr5:2960080-2961192 REVERSE LENGTH=370 | 201606	8	8	7.826	41612	AT5G09530.1	5.2971	0.000726475	0.00407473	0.999911	AT5G09530.1	4.98568	8.44489e-05	0.000769121	1	AT5G09530.1	4.75801	0.00458369	0.0392821	0.98561	AT5G09530.1	4.50294	0.000136245	0.00218422	1	AT5G09530.1	1.11176	0.609926	0.855773	0.0737693	AT5G09530.1	0.832605	0.339852	0.766985	0.140987	AT5G09530.1	0.710314	0.100678	0.742917	0.377308	AT5G09530.1	1.06246	0.869195	0.96808	0.052457	AT5G09530.1	1.1133	0.653868
cytosol	AT3G04520.1;AT3G04520.3	| threonine aldolase 2 | Chr3:1217397-1219571 REVERSE LENGTH=355 | 201606 [AT3G04520.1,AT3G04520.3]	2	2	1.981	38251.8	AT3G04520.1;AT3G04520.3	5.29633	0.1684	0.242165	0.263333	AT3G04520.1;AT3G04520.3	10.2814	0.114528	0.16601	0.347135	AT3G04520.1;AT3G04520.3	13.9008	0.165965	0.303284	0.25716	AT3G04520.1;AT3G04520.3	6.77615	0.145702	0.24365	0.293573	AT3G04520.1;AT3G04520.3	1.17215	0.354481	0.729932	0.135026	AT3G04520.1;AT3G04520.3	0.686548	0.500013	0.855237	0.0927049	AT3G04520.1;AT3G04520.3	0.777162	0.880088	0.963554	0.0520078	AT3G04520.1;AT3G04520.3	0.515137	0.0835212	0.676154	0.414445	AT3G04520.1;AT3G04520.3	0.38101	0.0559596
cytosol	AT3G27960.1;AT3G27960.3	| Tetratricopeptide repeat (TPR)-like superfamily protein | Chr3:10380513-10382593 REVERSE LENGTH=663 | 201606 [AT3G27960.1,AT3G27960.3]	2	1	1.93	72517.5	AT3G27960.1;AT3G27960.3	5.28955	0.0137289	0.0329228	0.847933	AT3G27960.1;AT3G27960.3	3.23767	0.153121	0.211975	0.283024	AT3G27960.1;AT3G27960.3	4.89367	0.540014	0.664009	0.0821054	AT3G27960.1;AT3G27960.3	4.20839	0.0523569	0.112316	0.540948	AT3G27960.1;AT3G27960.3	2.46033	0.319627	0.70501	0.149958	AT3G27960.1;AT3G27960.3	1.29259	0.97563	0.993835	0.0500821	AT3G27960.1;AT3G27960.3	1.46791	0.703129	0.90467	0.0630447	AT3G27960.1;AT3G27960.3	1.63375	0.159241	0.74039	0.27355	AT3G27960.1;AT3G27960.3	1.0809	0.40923
nucleus	AT4G31200.1;AT4G31200.2;AT4G31200.3	| SWAP (Suppressor-of-White-APricot)/surp RNA-binding domain-containing protein | Chr4:15162323-15164568 REVERSE LENGTH=650 | 201606 [AT4G31200.1,AT4G31200.2,AT4G31200.3]	2	1	1.983	72497.2	AT4G31200.1;AT4G31200.2;AT4G31200.3	5.26889	0.192299	0.270037	0.237031	AT4G31200.1;AT4G31200.2;AT4G31200.3	3.93242	0.0861166	0.130484	0.415061	AT4G31200.1;AT4G31200.2;AT4G31200.3	4.46159	0.59027	0.707989	0.0744442	AT4G31200.1;AT4G31200.2;AT4G31200.3	1.6494	0.308742	0.430106	0.155175	AT4G31200.1;AT4G31200.2;AT4G31200.3	1.30551	0.94064	0.9797	0.050488	AT4G31200.1;AT4G31200.2;AT4G31200.3	2.13092	0.737117	0.939326	0.0600724	AT4G31200.1;AT4G31200.2;AT4G31200.3	3.79203	0.34241	0.808293	0.139914	AT4G31200.1;AT4G31200.2;AT4G31200.3	1.33986	0.807012	0.950934	0.0554298	AT4G31200.1;AT4G31200.2;AT4G31200.3	1.18094	0.657858
cytosol	AT4G04040.1	| Phosphofructokinase family protein | Chr4:1939250-1942765 FORWARD LENGTH=569 | 201606	8	4	7.88	62743.3	AT4G04040.1	5.25015	0.0013742	0.00628284	0.998849	AT4G04040.1	3.7514	7.96131e-05	0.00073966	1	AT4G04040.1	2.83401	0.00156164	0.0238326	0.99972	AT4G04040.1	2.13614	0.00133631	0.00885603	0.998956	AT4G04040.1	1.54062	0.0217154	0.289653	0.756758	AT4G04040.1	1.17566	0.306163	0.749099	0.156455	AT4G04040.1	1.28045	0.099821	0.742917	0.379342	AT4G04040.1	1.39952	0.185103	0.755267	0.244091	AT4G04040.1	1.85255	0.0548939
plastid	AT1G23740.1	| Oxidoreductase%2C zinc-binding dehydrogenase family protein | Chr1:8398245-8399656 REVERSE LENGTH=386 | 201606	14	13	14.789	40986.1	AT1G23740.1	5.24509	3.14041e-05	0.000604382	1	AT1G23740.1	4.80377	3.7304e-05	0.000462388	1	AT1G23740.1	4.44009	0.00439488	0.038442	0.987156	AT1G23740.1	3.35793	0.000125814	0.00208969	1	AT1G23740.1	1.38945	0.110954	0.511677	0.354467	AT1G23740.1	1.52745	0.0293997	0.354892	0.686519	AT1G23740.1	1.01208	0.873995	0.962554	0.0522195	AT1G23740.1	1.09187	0.0871946	0.677793	0.404466	AT1G23740.1	1.1813	0.309323
nucleus	AT3G56860.1;AT3G56860.10;AT3G56860.11;AT3G56860.2;AT3G56860.3;AT3G56860.4;AT3G56860.5;AT3G56860.6;AT3G56860.7;AT3G56860.8;AT3G56860.9	| UBP1-associated protein 2A | Chr3:21050708-21052144 REVERSE LENGTH=478 | 201606 [AT3G56860.1,AT3G56860.10,AT3G56860.11,AT3G56860.2,AT3G56860.3,AT3G56860.4,AT3G56860.5,AT3G56860.6,AT3G56860.7,AT3G56860.8,AT3G56860.9]	7	5	6.944	51438.7	AT3G56860.1;AT3G56860.10;AT3G56860.11;AT3G56860.2;AT3G56860.3;AT3G56860.4;AT3G56860.5;AT3G56860.6;AT3G56860.7;AT3G56860.8;AT3G56860.9	5.23833	0.000689094	0.00392867	0.99993	AT3G56860.1;AT3G56860.10;AT3G56860.11;AT3G56860.2;AT3G56860.3;AT3G56860.4;AT3G56860.5;AT3G56860.6;AT3G56860.7;AT3G56860.8;AT3G56860.9	4.7298	0.000778799	0.00333996	0.999877	AT3G56860.1;AT3G56860.10;AT3G56860.11;AT3G56860.2;AT3G56860.3;AT3G56860.4;AT3G56860.5;AT3G56860.6;AT3G56860.7;AT3G56860.8;AT3G56860.9	4.50069	0.00831034	0.0533247	0.944665	AT3G56860.1;AT3G56860.10;AT3G56860.11;AT3G56860.2;AT3G56860.3;AT3G56860.4;AT3G56860.5;AT3G56860.6;AT3G56860.7;AT3G56860.8;AT3G56860.9	2.18942	0.0126055	0.0400133	0.862458	AT3G56860.1;AT3G56860.10;AT3G56860.11;AT3G56860.2;AT3G56860.3;AT3G56860.4;AT3G56860.5;AT3G56860.6;AT3G56860.7;AT3G56860.8;AT3G56860.9	1.59515	0.108975	0.506687	0.358657	AT3G56860.1;AT3G56860.10;AT3G56860.11;AT3G56860.2;AT3G56860.3;AT3G56860.4;AT3G56860.5;AT3G56860.6;AT3G56860.7;AT3G56860.8;AT3G56860.9	1.0587	0.680248	0.924831	0.0653097	AT3G56860.1;AT3G56860.10;AT3G56860.11;AT3G56860.2;AT3G56860.3;AT3G56860.4;AT3G56860.5;AT3G56860.6;AT3G56860.7;AT3G56860.8;AT3G56860.9	1.15111	0.510848	0.846772	0.090457	AT3G56860.1;AT3G56860.10;AT3G56860.11;AT3G56860.2;AT3G56860.3;AT3G56860.4;AT3G56860.5;AT3G56860.6;AT3G56860.7;AT3G56860.8;AT3G56860.9	1.10752	0.258429	0.784395	0.184515	AT3G56860.1;AT3G56860.10;AT3G56860.11;AT3G56860.2;AT3G56860.3;AT3G56860.4;AT3G56860.5;AT3G56860.6;AT3G56860.7;AT3G56860.8;AT3G56860.9	1.16389	0.34458
plastid	AT1G76450.1	| Photosystem II reaction center PsbP family protein | Chr1:28684618-28686109 FORWARD LENGTH=247 | 201606	4	4	4.931	27490.3	AT1G76450.1	5.19905	5.52248e-05	0.000830333	1	AT1G76450.1	6.02026	6.33441e-05	0.00062874	1	AT1G76450.1	4.25948	0.00143735	0.0230673	0.999814	AT1G76450.1	2.71148	0.000872531	0.00679051	0.999799	AT1G76450.1	1.32386	0.169798	0.595853	0.261655	AT1G76450.1	1.44429	0.0761271	0.498628	0.445618	AT1G76450.1	0.913457	0.662027	0.892068	0.0672757	AT1G76450.1	0.863593	0.0731534	0.656153	0.445524	AT1G76450.1	1.22058	0.0736153
plastid	AT2G27680.1	| NAD(P)-linked oxidoreductase superfamily protein | Chr2:11803981-11805965 REVERSE LENGTH=384 | 201606	5	5	4.9	43155.4	AT2G27680.1	5.18907	7.28345e-05	0.000989693	1	AT2G27680.1	5.29735	0.000106657	0.000897855	1	AT2G27680.1	4.70803	0.000374547	0.0132184	1	AT2G27680.1	3.02253	0.000383862	0.00397309	0.999997	AT2G27680.1	1.2796	0.308467	0.697343	0.155311	AT2G27680.1	1.29748	0.232486	0.705577	0.201909	AT2G27680.1	1.23714	0.0755982	0.742917	0.447363	AT2G27680.1	0.97956	0.902111	0.978415	0.0513683	AT2G27680.1	1.10217	0.455976
plastid	AT3G10940.1	| dual specificity protein phosphatase (DsPTP1) family protein | Chr3:3422259-3423394 REVERSE LENGTH=282 | 201606	3	3	2.981	32088.6	AT3G10940.1	5.17659	0.00626385	0.0182843	0.949727	AT3G10940.1	3.97753	0.0115961	0.0252492	0.875853	AT3G10940.1	1.80506	0.221648	0.363712	0.201877	AT3G10940.1	1.48958	0.314922	0.435175	0.152178	AT3G10940.1	1.98601	0.711391	0.899773	0.0622803	AT3G10940.1	1.24436	0.555638	0.883666	0.0821133	AT3G10940.1	1.60829	0.600018	0.875228	0.0751632	AT3G10940.1	1.30146	0.00501486	0.383706	0.945531	AT3G10940.1	2.86782	0.00324654
mitochondrion	AT4G37930.1	| serine transhydroxymethyltransferase 1 | Chr4:17831891-17834742 REVERSE LENGTH=517 | 201606	29	17	33.726	57401.7	AT4G37930.1	5.17432	0.000195156	0.00173692	1	AT4G37930.1	4.74472	0.000320275	0.00181742	0.999999	AT4G37930.1	3.95374	0.00722547	0.0497548	0.958031	AT4G37930.1	2.34792	0.00228842	0.0126824	0.994434	AT4G37930.1	1.21162	0.392325	0.7553	0.121358	AT4G37930.1	1.0582	0.812097	0.961799	0.0550104	AT4G37930.1	1.01295	0.81006	0.941735	0.0551227	AT4G37930.1	1.09054	0.469835	0.838509	0.100438	AT4G37930.1	1.30871	0.181071
plastid	AT4G01310.1	| Ribosomal L5P family protein | Chr4:544166-545480 REVERSE LENGTH=262 | 201606	11	10	11.872	28344.8	AT4G01310.1	5.17307	4.10935e-06	0.000193368	1	AT4G01310.1	5.33606	2.9441e-06	0.000100415	1	AT4G01310.1	4.45057	7.13591e-05	0.00710322	1	AT4G01310.1	2.70087	5.6236e-05	0.00130498	1	AT4G01310.1	1.43389	0.116607	0.521807	0.343001	AT4G01310.1	1.21464	0.0852332	0.5177	0.417592	AT4G01310.1	0.993769	0.982925	0.995858	0.0500403	AT4G01310.1	0.969454	0.551111	0.87152	0.083599	AT4G01310.1	1.16234	0.0544757
extracellular	AT1G33811.1	| GDSL-like Lipase/Acylhydrolase superfamily protein | Chr1:12267918-12269690 FORWARD LENGTH=370 | 201606	2	1	1.961	41698.8	AT1G33811.1	5.1466	0.000182304	0.00169372	1	AT1G33811.1	4.47048	1.98131e-05	0.000316635	1	AT1G33811.1	7.62758	0.00185233	0.0255109	0.999383	AT1G33811.1	3.38348	0.000575084	0.00514538	0.999971	AT1G33811.1	0.856008	0.437524	0.781284	0.107759	AT1G33811.1	0.734029	0.320667	0.75586	0.149474	AT1G33811.1	0.820106	0.416988	0.823065	0.113613	AT1G33811.1	1.15124	0.455879	0.833368	0.103908	AT1G33811.1	0.674735	0.253931
cytosol	AT1G21130.1;AT1G21130.2	| O-methyltransferase family protein | Chr1:7399170-7400470 REVERSE LENGTH=373 | 201606 [AT1G21130.1,AT1G21130.2]	8	3	7.902	40748.4	AT1G21130.1;AT1G21130.2	5.1376	0.000179142	0.00167046	1	AT1G21130.1;AT1G21130.2	4.64164	0.000108243	0.000904754	1	AT1G21130.1;AT1G21130.2	4.39002	0.000562288	0.015281	1	AT1G21130.1;AT1G21130.2	2.37942	0.00121725	0.00830343	0.999253	AT1G21130.1;AT1G21130.2	1.93895	0.0247719	0.30562	0.727024	AT1G21130.1;AT1G21130.2	1.23958	0.264425	0.723798	0.179826	AT1G21130.1;AT1G21130.2	0.82036	0.392364	0.818738	0.121345	AT1G21130.1;AT1G21130.2	1.10685	0.421648	0.821786	0.113295	AT1G21130.1;AT1G21130.2	1.17029	0.247362
plastid	AT4G25100.1;AT4G25100.2;AT4G25100.3;AT4G25100.5	| Fe superoxide dismutase 1 | Chr4:12884649-12886501 REVERSE LENGTH=212 | 201606 [AT4G25100.1,AT4G25100.2,AT4G25100.3,AT4G25100.5]	4	4	5.982	23791.5	AT4G25100.1;AT4G25100.2;AT4G25100.3;AT4G25100.5	5.13516	0.0572381	0.0999945	0.518044	AT4G25100.1;AT4G25100.2;AT4G25100.3;AT4G25100.5	3.82237	0.0271187	0.0497176	0.705852	AT4G25100.1;AT4G25100.2;AT4G25100.3;AT4G25100.5	4.06093	0.0860591	0.201731	0.410041	AT4G25100.1;AT4G25100.2;AT4G25100.3;AT4G25100.5	1.3912	0.293574	0.414834	0.162955	AT4G25100.1;AT4G25100.2;AT4G25100.3;AT4G25100.5	1.21855	0.395414	0.756471	0.120342	AT4G25100.1;AT4G25100.2;AT4G25100.3;AT4G25100.5	1.0425	0.64081	0.910185	0.0697577	AT4G25100.1;AT4G25100.2;AT4G25100.3;AT4G25100.5	1.0642	0.541552	0.858829	0.084582	AT4G25100.1;AT4G25100.2;AT4G25100.3;AT4G25100.5	1.34345	0.876256	0.970504	0.0521959	AT4G25100.1;AT4G25100.2;AT4G25100.3;AT4G25100.5	1.26453	0.856974
mitochondrion	AT4G33010.1	| glycine decarboxylase P-protein 1 | Chr4:15926852-15931150 REVERSE LENGTH=1037 | 201606	39	17	49.534	112927	AT4G33010.1	5.1036	0.000210055	0.00181548	1	AT4G33010.1	4.64448	0.000262489	0.00158617	1	AT4G33010.1	3.15067	0.00860477	0.0541389	0.940926	AT4G33010.1	2.38111	0.00448927	0.0196887	0.972824	AT4G33010.1	1.23324	0.412453	0.76338	0.114976	AT4G33010.1	0.969906	0.959824	0.992834	0.0502232	AT4G33010.1	0.728258	0.181135	0.763824	0.248712	AT4G33010.1	1.09885	0.0223941	0.525516	0.721672	AT4G33010.1	1.61985	0.007252
plastid	AT2G15620.1	| nitrite reductase 1 | Chr2:6810552-6812666 FORWARD LENGTH=586 | 201606	20	17	20.909	65505.8	AT2G15620.1	5.10003	4.59492e-06	0.000206649	1	AT2G15620.1	4.1274	5.26957e-08	1.21686e-05	1	AT2G15620.1	3.48096	0.0072351	0.0497548	0.957916	AT2G15620.1	2.49222	9.72564e-06	0.000531532	1	AT2G15620.1	1.62362	0.00933035	0.214556	0.906923	AT2G15620.1	1.53143	0.0303697	0.357922	0.678643	AT2G15620.1	1.13812	0.322797	0.802443	0.148492	AT2G15620.1	1.23565	0.0173591	0.494837	0.773644	AT2G15620.1	1.46512	0.0967049
nucleus	AT3G17330.1;AT3G17330.2;AT3G17330.3	| evolutionarily conserved C-terminal region 6 | Chr3:5917253-5919458 REVERSE LENGTH=595 | 201606 [AT3G17330.1,AT3G17330.2,AT3G17330.3]	4	3	3.954	65651.4	AT3G17330.1;AT3G17330.2;AT3G17330.3	5.0723	0.025608	0.0532269	0.719324	AT3G17330.1;AT3G17330.2;AT3G17330.3	7.02458	0.00827929	0.0194523	0.921647	AT3G17330.1;AT3G17330.2;AT3G17330.3	5.33195	0.0358784	0.121394	0.648753	AT3G17330.1;AT3G17330.2;AT3G17330.3	4.67396	0.0136035	0.0420516	0.849533	AT3G17330.1;AT3G17330.2;AT3G17330.3	2.94878	0.0430675	0.383308	0.591094	AT3G17330.1;AT3G17330.2;AT3G17330.3	2.18193	0.154214	0.639189	0.281528	AT3G17330.1;AT3G17330.2;AT3G17330.3	1.64231	0.193891	0.763824	0.235443	AT3G17330.1;AT3G17330.2;AT3G17330.3	0.722079	0.334914	0.802699	0.144242	AT3G17330.1;AT3G17330.2;AT3G17330.3	0.951303	0.839253
peroxisome	AT4G18360.1;AT4G18360.4	| Aldolase-type TIM barrel family protein | Chr4:10146141-10148386 REVERSE LENGTH=368 | 201606 [AT4G18360.1,AT4G18360.4]	8	1	9.917	40483	AT4G18360.1;AT4G18360.4	5.01189	2.3973e-06	0.000147102	1	AT4G18360.1;AT4G18360.4	4.82917	7.58509e-08	1.37669e-05	1	AT4G18360.1;AT4G18360.4	4.14464	4.41748e-05	0.00584509	1	AT4G18360.1;AT4G18360.4	2.75715	1.30332e-05	0.000611294	1	AT4G18360.1;AT4G18360.4	1.56758	0.00833702	0.208492	0.920836	AT4G18360.1;AT4G18360.4	1.23309	0.00173703	0.095372	0.997515	AT4G18360.1;AT4G18360.4	1.21938	0.0476529	0.742917	0.565154	AT4G18360.1;AT4G18360.4	1.03784	0.601663	0.887634	0.0754948	AT4G18360.1;AT4G18360.4	1.20925	0.0850052
cytosol	AT3G51240.1	| flavanone 3-hydroxylase | Chr3:19025409-19026658 FORWARD LENGTH=358 | 201606	11	9	10.855	40276	AT3G51240.1	5.00999	0.00609271	0.0179393	0.952057	AT3G51240.1	5.17703	0.00623794	0.015578	0.95008	AT3G51240.1	6.12226	0.0140468	0.0711725	0.86969	AT3G51240.1	5.551	0.00680811	0.0262909	0.942232	AT3G51240.1	4.63814	0.0077661	0.20344	0.928853	AT3G51240.1	3.50341	0.0157957	0.256447	0.822315	AT3G51240.1	1.41897	0.208606	0.769699	0.2216	AT3G51240.1	0.967733	0.751035	0.936943	0.0592094	AT3G51240.1	0.818323	0.0413865
plastid	AT1G26230.1;AT1G26230.3;AT1G26230.4	| TCP-1/cpn60 chaperonin family protein | Chr1:9072388-9075272 REVERSE LENGTH=611 | 201606 [AT1G26230.1,AT1G26230.3,AT1G26230.4]	4	3	3.971	66798	AT1G26230.1;AT1G26230.3;AT1G26230.4	5.00277	0.00564165	0.0170154	0.958119	AT1G26230.1;AT1G26230.3;AT1G26230.4	4.04605	0.0311058	0.055701	0.672797	AT1G26230.1;AT1G26230.3;AT1G26230.4	2.01753	0.129052	0.261293	0.311506	AT1G26230.1;AT1G26230.3;AT1G26230.4	1.7355	0.264541	0.383784	0.179753	AT1G26230.1;AT1G26230.3;AT1G26230.4	0.644575	0.364998	0.737182	0.130987	AT1G26230.1;AT1G26230.3;AT1G26230.4	1.51579	0.368716	0.783696	0.129606	AT1G26230.1;AT1G26230.3;AT1G26230.4	0.947172	0.945957	0.982868	0.0504043	AT1G26230.1;AT1G26230.3;AT1G26230.4	1.23646	0.418971	0.819731	0.114087	AT1G26230.1;AT1G26230.3;AT1G26230.4	2.47964	0.0154976
nucleus	AT1G20960.1;AT1G20960.2;AT2G42270.1	| U5 small nuclear ribonucleoprotein helicase | Chr1:7302591-7309914 REVERSE LENGTH=2171 | 201606 [AT1G20960.1,AT1G20960.2]	17	17	18.74	247109	AT1G20960.1;AT1G20960.2;AT2G42270.1	5.00255	9.70347e-05	0.00116013	1	AT1G20960.1;AT1G20960.2;AT2G42270.1	3.93164	0.000121139	0.000968418	1	AT1G20960.1;AT1G20960.2;AT2G42270.1	2.12218	0.782556	0.8549	0.0562004	AT1G20960.1;AT1G20960.2;AT2G42270.1	0.918121	0.548423	0.652341	0.0833609	AT1G20960.1;AT1G20960.2;AT2G42270.1	1.09186	0.760032	0.91942	0.0583161	AT1G20960.1;AT1G20960.2;AT2G42270.1	1.17269	0.490512	0.85308	0.094757	AT1G20960.1;AT1G20960.2;AT2G42270.1	1.18842	0.438816	0.835256	0.107407	AT1G20960.1;AT1G20960.2;AT2G42270.1	1.27238	0.164485	0.743631	0.267081	AT1G20960.1;AT1G20960.2;AT2G42270.1	2.35727	0.0815755
plastid	AT1G74640.1	| alpha/beta-Hydrolases superfamily protein | Chr1:28032849-28034659 FORWARD LENGTH=370 | 201606	3	3	2.985	41058.9	AT1G74640.1	4.99441	0.000251279	0.00203344	1	AT1G74640.1	4.71791	3.77186e-05	0.000464405	1	AT1G74640.1	3.40278	0.00971728	0.0583037	0.926525	AT1G74640.1	1.85668	0.000931273	0.00700976	0.999736	AT1G74640.1	1.64496	0.00548301	0.167814	0.960218	AT1G74640.1	1.16825	0.590491	0.894785	0.0765557	AT1G74640.1	1.42648	0.136949	0.751498	0.306982	AT1G74640.1	1.05861	0.80503	0.949943	0.0555451	AT1G74640.1	1.46774	0.165438
cytosol	AT2G20340.1;AT2G20340.2	| Pyridoxal phosphate (PLP)-dependent transferases superfamily protein | Chr2:8779804-8782490 FORWARD LENGTH=490 | 201606 [AT2G20340.1,AT2G20340.2]	3	3	2.912	54424.4	AT2G20340.1;AT2G20340.2	4.97385	0.00145944	0.00657523	0.998586	AT2G20340.1;AT2G20340.2	3.30241	0.000105397	0.000892712	1	AT2G20340.1;AT2G20340.2	1.24373	0.714441	0.803984	0.0610025	AT2G20340.1;AT2G20340.2	1.3452	0.854323	0.897125	0.0529789	AT2G20340.1;AT2G20340.2	0.700925	0.0868769	0.471203	0.412906	AT2G20340.1;AT2G20340.2	0.910517	0.610763	0.900724	0.0736539	AT2G20340.1;AT2G20340.2	1.60847	0.0660151	0.742917	0.481581	AT2G20340.1;AT2G20340.2	1.50613	0.127024	0.72179	0.320475	AT2G20340.1;AT2G20340.2	3.99914	0.0352872
plastid	AT5G40950.1	| ribosomal protein large subunit 27 | Chr5:16410866-16411845 FORWARD LENGTH=198 | 201606	2	2	1.994	21738	AT5G40950.1	4.9326	0.00424353	0.0137099	0.975752	AT5G40950.1	3.58872	0.00308972	0.00918518	0.987995	AT5G40950.1	4.78596	0.0148205	0.0732665	0.859774	AT5G40950.1	4.28561	0.00230849	0.0127658	0.994299	AT5G40950.1	2.70673	0.0419733	0.379052	0.597668	AT5G40950.1	1.8746	0.0901208	0.527571	0.403956	AT5G40950.1	1.77846	0.0558831	0.742917	0.524195	AT5G40950.1	1.37448	0.193553	0.757107	0.23565	AT5G40950.1	1.03064	0.911475
plastid	AT5G35630.1;AT5G35630.2;AT5G35630.3	| glutamine synthetase 2 | Chr5:13831220-13833239 FORWARD LENGTH=430 | 201606 [AT5G35630.1,AT5G35630.2,AT5G35630.3]	21	19	28.726	47411.3	AT5G35630.1;AT5G35630.2;AT5G35630.3	4.91956	7.21211e-05	0.000985268	1	AT5G35630.1;AT5G35630.2;AT5G35630.3	4.2037	6.04912e-05	0.000609953	1	AT5G35630.1;AT5G35630.2;AT5G35630.3	3.83986	2.94752e-05	0.00516527	1	AT5G35630.1;AT5G35630.2;AT5G35630.3	2.45676	1.37704e-05	0.000613617	1	AT5G35630.1;AT5G35630.2;AT5G35630.3	1.36971	0.0369719	0.361329	0.629855	AT5G35630.1;AT5G35630.2;AT5G35630.3	1.16884	0.0568664	0.462094	0.519716	AT5G35630.1;AT5G35630.2;AT5G35630.3	1.02278	0.673952	0.894036	0.0659722	AT5G35630.1;AT5G35630.2;AT5G35630.3	1.17029	0.308207	0.796387	0.156546	AT5G35630.1;AT5G35630.2;AT5G35630.3	1.28118	0.123662
plastid	AT3G55330.1	| PsbP-like protein 1 | Chr3:20514031-20515275 REVERSE LENGTH=230 | 201606	7	7	8.821	25623.7	AT3G55330.1	4.91703	0.00171976	0.00735677	0.997591	AT3G55330.1	3.92118	0.00723428	0.0174488	0.936301	AT3G55330.1	5.16064	0.00397297	0.0364452	0.990331	AT3G55330.1	4.38387	0.000169748	0.00245074	1	AT3G55330.1	2.02698	0.0104856	0.223898	0.89093	AT3G55330.1	1.62286	0.108909	0.566505	0.358798	AT3G55330.1	1.19752	0.491744	0.843416	0.0944867	AT3G55330.1	1.25397	0.387623	0.804409	0.124051	AT3G55330.1	0.952795	0.858712
plastid	AT3G08920.1	| Rhodanese/Cell cycle control phosphatase superfamily protein | Chr3:2712274-2713117 FORWARD LENGTH=214 | 201606	3	3	2.896	23780.2	AT3G08920.1	4.88964	0.000632726	0.00368752	0.999954	AT3G08920.1	3.46221	0.00279066	0.00851591	0.990638	AT3G08920.1	3.63004	0.0291974	0.107523	0.704018	AT3G08920.1	1.85543	0.0160857	0.047583	0.818836	AT3G08920.1	0.893771	0.666354	0.881966	0.0667953	AT3G08920.1	2.75818	0.350429	0.769487	0.136636	AT3G08920.1	1.25742	0.599894	0.875228	0.0751811	AT3G08920.1	1.41229	0.0988795	0.695384	0.375696	AT3G08920.1	1.34699	0.263661
plastid	AT3G10060.1	| FKBP-like peptidyl-prolyl cis-trans isomerase family protein | Chr3:3102291-3103801 FORWARD LENGTH=230 | 201606	5	4	4.98	24504.8	AT3G10060.1	4.87798	9.9845e-05	0.00118003	1	AT3G10060.1	4.55115	0.000127826	0.00100687	1	AT3G10060.1	4.17847	0.00196004	0.0263748	0.999211	AT3G10060.1	2.44449	0.00151553	0.00955572	0.998397	AT3G10060.1	1.3151	0.339725	0.72044	0.141041	AT3G10060.1	1.16479	0.373875	0.787347	0.127728	AT3G10060.1	1.21718	0.370658	0.8138	0.128894	AT3G10060.1	1.07181	0.0413519	0.595003	0.58196	AT3G10060.1	1.16741	0.125033
plastid	AT2G03420.1	| hypothetical protein | Chr2:1035100-1035937 REVERSE LENGTH=170 | 201606	2	2	2.984	19029	AT2G03420.1	4.87627	0.000596954	0.00355237	0.999965	AT2G03420.1	4.33032	3.92525e-07	3.27019e-05	1	AT2G03420.1	2.73362	0.174396	0.314061	0.247133	AT2G03420.1	2.89174	2.37882e-05	0.000828024	1	AT2G03420.1	1.65804	0.009516	0.214935	0.904336	AT2G03420.1	1.1137	0.506702	0.85719	0.0913058	AT2G03420.1	1.09116	0.605944	0.877051	0.074323	AT2G03420.1	1.12608	0.668472	0.906128	0.0669615	AT2G03420.1	1.78381	0.171351
plastid	AT1G77490.1;AT1G77490.2	| thylakoidal ascorbate peroxidase | Chr1:29117688-29120046 FORWARD LENGTH=426 | 201606 [AT1G77490.1,AT1G77490.2]	9	7	12.953	46094.3	AT1G77490.1;AT1G77490.2	4.87463	2.81421e-05	0.00057437	1	AT1G77490.1;AT1G77490.2	4.19791	2.12567e-05	0.000330194	1	AT1G77490.1;AT1G77490.2	2.95039	0.00843081	0.0536909	0.94314	AT1G77490.1;AT1G77490.2	1.75	0.0021761	0.0123006	0.99516	AT1G77490.1;AT1G77490.2	0.989467	0.949369	0.983627	0.0503548	AT1G77490.1;AT1G77490.2	0.997636	0.991448	0.996341	0.0500101	AT1G77490.1;AT1G77490.2	0.874253	0.284174	0.789232	0.168101	AT1G77490.1;AT1G77490.2	1.1612	0.0336697	0.564761	0.630408	AT1G77490.1;AT1G77490.2	1.6522	0.0252905
plastid	AT5G65840.1	| Thioredoxin superfamily protein | Chr5:26344097-26346057 REVERSE LENGTH=275 | 201606	2	2	1.983	29884.2	AT5G65840.1	4.8676	4.44107e-05	0.000735164	1	AT5G65840.1	4.69397	3.61393e-05	0.000454603	1	AT5G65840.1	3.44772	0.0738644	0.184552	0.450108	AT5G65840.1	3.1799	0.000142181	0.00223398	1	AT5G65840.1	1.98295	0.00156524	0.104665	0.998217	AT5G65840.1	1.60111	0.00975039	0.209106	0.901078	AT5G65840.1	1.62338	0.0116532	0.594609	0.875087	AT5G65840.1	1.03699	0.583141	0.880517	0.078283	AT5G65840.1	1.41183	0.233819
plasma membrane	AT5G11330.1	| FAD/NAD(P)-binding oxidoreductase family protein | Chr5:3617342-3618861 REVERSE LENGTH=408 | 201606	4	3	3.988	45765.7	AT5G11330.1	4.86424	0.764883	0.818172	0.0579687	AT5G11330.1	4.97144	0.117705	0.169888	0.340858	AT5G11330.1	1.3108	0.711695	0.802493	0.0612301	AT5G11330.1	0.540024	0.113098	0.200037	0.350035	AT5G11330.1	3.63923	0.398351	0.757927	0.119388	AT5G11330.1	1.03121	0.912037	0.985223	0.0510749	AT5G11330.1	1.77342	0.09514	0.742917	0.390841	AT5G11330.1	0.978438	0.469589	0.838363	0.100497	AT5G11330.1	3.71091	0.870782
plastid	AT5G13510.1	| Ribosomal protein L10 family protein | Chr5:4341294-4341956 FORWARD LENGTH=220 | 201606	9	8	9.931	24736.6	AT5G13510.1	4.86403	0.000744433	0.00413848	0.9999	AT5G13510.1	4.91315	0.000324201	0.00182256	0.999999	AT5G13510.1	6.18412	0.000141385	0.00890255	1	AT5G13510.1	3.28203	8.33897e-05	0.00164897	1	AT5G13510.1	1.5238	0.0923813	0.476673	0.397944	AT5G13510.1	1.34092	0.0404953	0.40895	0.606804	AT5G13510.1	1.10058	0.276436	0.789232	0.172541	AT5G13510.1	0.990002	0.916963	0.982562	0.0509827	AT5G13510.1	0.786537	0.237329
plastid	AT3G53130.1	| Cytochrome P450 superfamily protein | Chr3:19692812-19695278 FORWARD LENGTH=539 | 201606	7	5	6.957	60557.5	AT3G53130.1	4.83025	0.00167309	0.00721785	0.997791	AT3G53130.1	5.12425	0.00139429	0.00507216	0.99879	AT3G53130.1	3.90454	0.0110153	0.0623601	0.909429	AT3G53130.1	2.19988	0.0128762	0.040657	0.85892	AT3G53130.1	1.35105	0.357508	0.731375	0.133843	AT3G53130.1	1.05094	0.904315	0.983356	0.0512733	AT3G53130.1	0.956962	0.952891	0.982868	0.050307	AT3G53130.1	0.942627	0.739307	0.931102	0.0601444	AT3G53130.1	1.23709	0.331213
plastid	AT1G02475.1	| Polyketide cyclase/dehydrase and lipid transport superfamily protein | Chr1:514110-515331 REVERSE LENGTH=219 | 201606	2	1	1.968	25037.9	AT1G02475.1	4.81996	0.00535222	0.016356	0.961934	AT1G02475.1	3.77321	0.0015324	0.00540809	0.998337	AT1G02475.1	4.89482	0.0221955	0.09126	0.772938	AT1G02475.1	3.02154	0.00492227	0.0208735	0.967463	AT1G02475.1	1.01079	0.972855	0.99156	0.0501018	AT1G02475.1	1.06287	0.986127	0.995988	0.0500266	AT1G02475.1	1.26087	0.258209	0.787972	0.183799	AT1G02475.1	1.27742	0.503352	0.848569	0.0928455	AT1G02475.1	0.984706	0.926203
plastid	AT3G15360.1	| thioredoxin M-type 4 | Chr3:5188448-5189457 FORWARD LENGTH=193 | 201606	8	8	9.946	21172.6	AT3G15360.1	4.8169	0.000441369	0.00292026	0.999993	AT3G15360.1	5.21632	3.78591e-05	0.000464405	1	AT3G15360.1	4.30864	0.000724539	0.0170468	0.999997	AT3G15360.1	2.94953	0.000142819	0.00223398	1	AT3G15360.1	1.51544	0.0126765	0.235978	0.861528	AT3G15360.1	1.15577	0.345149	0.768682	0.138781	AT3G15360.1	1.02338	0.760761	0.924897	0.0582633	AT3G15360.1	0.923429	0.532722	0.861203	0.0869595	AT3G15360.1	1.11796	0.63963
plastid	AT1G45474.1;AT1G45474.2	| photosystem I light harvesting complex protein 5 | Chr1:17179353-17180439 FORWARD LENGTH=256 | 201606 [AT1G45474.1,AT1G45474.2]	3	3	2.919	27802.9	AT1G45474.1;AT1G45474.2	4.81524	0.00061574	0.00361473	0.999959	AT1G45474.1;AT1G45474.2	4.26299	0.000744812	0.00325463	0.9999	AT1G45474.1;AT1G45474.2	4.04	0.00398211	0.0364623	0.990267	AT1G45474.1;AT1G45474.2	2.50457	0.00603744	0.0241213	0.952806	AT1G45474.1;AT1G45474.2	1.68897	0.0809751	0.4627	0.430243	AT1G45474.1;AT1G45474.2	1.0288	0.918278	0.986615	0.0509271	AT1G45474.1;AT1G45474.2	1.146	0.445931	0.835634	0.105503	AT1G45474.1;AT1G45474.2	1.12955	0.118844	0.71572	0.334847	AT1G45474.1;AT1G45474.2	1.19189	0.0637706
cytosol	AT3G19710.1	| branched-chain aminotransferase4 | Chr3:6847202-6849429 REVERSE LENGTH=354 | 201606	2	2	1.984	39019.9	AT3G19710.1	4.78368	0.0175273	0.0395378	0.801967	AT3G19710.1	0.303946	0.0284477	0.0517249	0.694446	AT3G19710.1	0.318633	0.0615108	0.165952	0.499604	AT3G19710.1	0.435596	0.0187116	0.0533029	0.788622	AT3G19710.1	0.746502	0.438794	0.781617	0.107413	AT3G19710.1	0.314752	0.0177752	0.277097	0.799136	AT3G19710.1	0.632653	0.167415	0.763824	0.264528	AT3G19710.1	15.7386	0.000857583	0.233038	0.998818	AT3G19710.1	15.0131	0.00340595
plastid	AT2G24060.1	| Translation initiation factor 3 protein | Chr2:10229453-10231390 FORWARD LENGTH=312 | 201606	11	8	12.919	35143	AT2G24060.1	4.78325	8.63387e-05	0.00110034	1	AT2G24060.1	4.26171	3.43008e-05	0.000446767	1	AT2G24060.1	3.87599	0.000970704	0.0203848	0.99998	AT2G24060.1	2.94158	0.000113306	0.00197199	1	AT2G24060.1	1.42024	0.0942968	0.478569	0.392985	AT2G24060.1	1.37275	0.0292881	0.354386	0.687438	AT2G24060.1	1.02625	0.919732	0.976169	0.0508942	AT2G24060.1	1.12238	0.2627	0.787478	0.181807	AT2G24060.1	1.23407	0.161864
plastid	AT5G35100.1;AT5G35100.3	| Cyclophilin-like peptidyl-prolyl cis-trans isomerase family protein | Chr5:13360459-13361404 REVERSE LENGTH=290 | 201606 [AT5G35100.1,AT5G35100.3]	4	4	3.972	31386.6	AT5G35100.1;AT5G35100.3	4.76864	9.25411e-05	0.0011329	1	AT5G35100.1;AT5G35100.3	4.65653	0.000147178	0.00109338	1	AT5G35100.1;AT5G35100.3	3.39474	0.0011097	0.0216904	0.999954	AT5G35100.1;AT5G35100.3	2.32357	0.0029788	0.015033	0.989006	AT5G35100.1;AT5G35100.3	1.15212	0.520003	0.819428	0.0886308	AT5G35100.1;AT5G35100.3	1.2255	0.137015	0.622956	0.306877	AT5G35100.1;AT5G35100.3	1.15232	0.473864	0.839276	0.0985456	AT5G35100.1;AT5G35100.3	1.02407	0.830725	0.961264	0.0541504	AT5G35100.1;AT5G35100.3	1.40471	0.0309098
plastid	AT3G63410.1	| S-adenosyl-L-methionine-dependent methyltransferases superfamily protein | Chr3:23415816-23417002 REVERSE LENGTH=338 | 201606	5	5	4.98	37927.8	AT3G63410.1	4.7519	0.000148745	0.00149688	1	AT3G63410.1	4.20015	0.000289092	0.00170635	1	AT3G63410.1	3.34726	0.0183573	0.0821412	0.81628	AT3G63410.1	2.49203	0.00396306	0.0181281	0.978977	AT3G63410.1	1.30391	0.507381	0.812284	0.0911658	AT3G63410.1	1.19782	0.240607	0.71152	0.195879	AT3G63410.1	1.04924	0.717214	0.909146	0.0617579	AT3G63410.1	1.13136	0.116147	0.712882	0.339857	AT3G63410.1	1.41964	0.115849
plastid	AT5G45170.1	| Haloacid dehalogenase-like hydrolase (HAD) superfamily protein | Chr5:18270555-18273129 REVERSE LENGTH=372 | 201606	8	7	7.971	40741.7	AT5G45170.1	4.74896	0.000192352	0.00171497	1	AT5G45170.1	4.49161	0.000164005	0.00116569	1	AT5G45170.1	3.05996	0.00503346	0.0408039	0.981643	AT5G45170.1	2.24173	0.0029063	0.014919	0.989647	AT5G45170.1	1.20724	0.225515	0.637407	0.207341	AT5G45170.1	0.944251	0.840528	0.965723	0.0535813	AT5G45170.1	1.06974	0.68951	0.898921	0.0643662	AT5G45170.1	1.0573	0.439473	0.828558	0.108243	AT5G45170.1	1.55197	0.00904313
cytosol	AT2G35390.1;AT2G35390.2;AT2G35390.3;AT2G35390.4	| Phosphoribosyltransferase family protein | Chr2:14895528-14897098 REVERSE LENGTH=352 | 201606 [AT2G35390.1,AT2G35390.2,AT2G35390.3,AT2G35390.4]	5	2	4.93	38272.4	AT2G35390.1;AT2G35390.2;AT2G35390.3;AT2G35390.4	4.74712	0.0170738	0.0388228	0.807199	AT2G35390.1;AT2G35390.2;AT2G35390.3;AT2G35390.4	5.61449	0.0132198	0.027958	0.854464	AT2G35390.1;AT2G35390.2;AT2G35390.3;AT2G35390.4	6.52507	0.0344236	0.119007	0.660024	AT2G35390.1;AT2G35390.2;AT2G35390.3;AT2G35390.4	6.39744	0.0096953	0.0332941	0.901843	AT2G35390.1;AT2G35390.2;AT2G35390.3;AT2G35390.4	2.42851	0.233429	0.642974	0.201193	AT2G35390.1;AT2G35390.2;AT2G35390.3;AT2G35390.4	2.68231	0.0620128	0.475338	0.497524	AT2G35390.1;AT2G35390.2;AT2G35390.3;AT2G35390.4	1.64347	0.225085	0.774095	0.207683	AT2G35390.1;AT2G35390.2;AT2G35390.3;AT2G35390.4	0.845512	0.19268	0.757107	0.236499	AT2G35390.1;AT2G35390.2;AT2G35390.3;AT2G35390.4	0.72752	0.267947
plastid	ATCG00780.1	| ribosomal protein L14 | ChrC:80696-81064 REVERSE LENGTH=122 | 201606	6	5	6.972	13582	ATCG00780.1	4.74378	1.05497e-05	0.000319128	1	ATCG00780.1	5.08173	1.51008e-05	0.000261919	1	ATCG00780.1	4.34804	0.000606245	0.0155508	0.999999	ATCG00780.1	3.56358	7.66959e-05	0.00155907	1	ATCG00780.1	1.91378	0.0677397	0.444198	0.475032	ATCG00780.1	1.66003	0.00198945	0.100639	0.996257	ATCG00780.1	1.21846	0.0737211	0.742917	0.453669	ATCG00780.1	0.933497	0.216909	0.778246	0.214752	ATCG00780.1	1.09102	0.350364
plastid	AT1G78630.1	| Ribosomal protein L13 family protein | Chr1:29575997-29577406 FORWARD LENGTH=241 | 201606	5	5	7.913	26788.9	AT1G78630.1	4.73999	0.00805816	0.0220525	0.924753	AT1G78630.1	4.37912	0.0030401	0.00906985	0.988451	AT1G78630.1	5.887	0.00800181	0.0522018	0.948538	AT1G78630.1	3.88997	0.00518643	0.0216322	0.964087	AT1G78630.1	1.76815	0.191253	0.609524	0.238085	AT1G78630.1	1.49075	0.184388	0.666166	0.245206	AT1G78630.1	2.46368	0.296766	0.789608	0.161265	AT1G78630.1	1.08241	0.918679	0.982843	0.0509423	AT1G78630.1	0.805162	0.387015
plastid	AT4G15510.1;AT4G15510.3;AT4G15510.4;AT4G15510.5	| Photosystem II reaction center PsbP family protein | Chr4:8860701-8862529 FORWARD LENGTH=287 | 201606 [AT4G15510.1,AT4G15510.3,AT4G15510.4,AT4G15510.5]	3	3	2.991	32266.5	AT4G15510.1;AT4G15510.3;AT4G15510.4;AT4G15510.5	4.73693	0.000479292	0.00309365	0.999989	AT4G15510.1;AT4G15510.3;AT4G15510.4;AT4G15510.5	4.47048	0.000493414	0.00244131	0.999987	AT4G15510.1;AT4G15510.3;AT4G15510.4;AT4G15510.5	3.64502	0.016295	0.0767479	0.841252	AT4G15510.1;AT4G15510.3;AT4G15510.4;AT4G15510.5	3.16567	0.00164399	0.0100812	0.997911	AT4G15510.1;AT4G15510.3;AT4G15510.4;AT4G15510.5	1.48921	0.330042	0.714342	0.145226	AT4G15510.1;AT4G15510.3;AT4G15510.4;AT4G15510.5	1.74538	0.0497843	0.443866	0.553906	AT4G15510.1;AT4G15510.3;AT4G15510.4;AT4G15510.5	0.902964	0.671251	0.893784	0.0662618	AT4G15510.1;AT4G15510.3;AT4G15510.4;AT4G15510.5	1.0596	0.492998	0.845916	0.0950853	AT4G15510.1;AT4G15510.3;AT4G15510.4;AT4G15510.5	1.29956	0.202659
cytosol	AT4G37470.1	| alpha/beta-Hydrolases superfamily protein | Chr4:17617045-17618363 REVERSE LENGTH=270 | 201606	4	4	4.961	29790.9	AT4G37470.1	4.73407	0.00105164	0.00528108	0.99957	AT4G37470.1	3.30605	0.138586	0.195095	0.30439	AT4G37470.1	5.21328	0.0118759	0.0643796	0.89806	AT4G37470.1	4.31579	0.000324646	0.00354866	0.999999	AT4G37470.1	4.52163	0.00172115	0.105989	0.997585	AT4G37470.1	3.02499	0.00203725	0.100639	0.995989	AT4G37470.1	2.48685	0.0356567	0.739622	0.638956	AT4G37470.1	1.43194	0.291499	0.796387	0.165122	AT4G37470.1	0.908079	0.913835
plastid	AT3G60370.1;AT3G60370.2	| FKBP-like peptidyl-prolyl cis-trans isomerase family protein | Chr3:22315000-22316533 REVERSE LENGTH=242 | 201606 [AT3G60370.1,AT3G60370.2]	5	5	4.978	27193	AT3G60370.1;AT3G60370.2	4.72477	0.000101488	0.0011922	1	AT3G60370.1;AT3G60370.2	4.37858	6.04521e-07	4.02469e-05	1	AT3G60370.1;AT3G60370.2	3.49533	0.0002365	0.0108951	1	AT3G60370.1;AT3G60370.2	2.77039	1.96706e-05	0.000735042	1	AT3G60370.1;AT3G60370.2	1.47772	0.13188	0.545778	0.315276	AT3G60370.1;AT3G60370.2	1.09672	0.961443	0.992834	0.0502056	AT3G60370.1;AT3G60370.2	1.06562	0.305273	0.795799	0.1569	AT3G60370.1;AT3G60370.2	1.07906	0.629505	0.896881	0.0716631	AT3G60370.1;AT3G60370.2	1.35174	0.115471
mitochondrion	AT4G36400.1;AT4G36400.2	| FAD-linked oxidases family protein | Chr4:17197265-17200472 FORWARD LENGTH=559 | 201606 [AT4G36400.1,AT4G36400.2]	4	2	3.944	61447.8	AT4G36400.1;AT4G36400.2	4.71562	0.0359646	0.0688927	0.6368	AT4G36400.1;AT4G36400.2	6.44879	0.0281406	0.0512766	0.697046	AT4G36400.1;AT4G36400.2	3.87812	0.0548344	0.154667	0.53126	AT4G36400.1;AT4G36400.2	2.6923	0.0603446	0.124807	0.504498	AT4G36400.1;AT4G36400.2	1.8498	0.288679	0.683527	0.165602	AT4G36400.1;AT4G36400.2	2.14646	0.674479	0.923812	0.0659161	AT4G36400.1;AT4G36400.2	2.15439	0.43563	0.83417	0.108278	AT4G36400.1;AT4G36400.2	0.731241	0.639239	0.899768	0.0704193	AT4G36400.1;AT4G36400.2	1.21596	0.806694
plastid	AT4G36530.1;AT4G36530.2	| alpha/beta-Hydrolases superfamily protein | Chr4:17240120-17241518 REVERSE LENGTH=321 | 201606 [AT4G36530.1,AT4G36530.2]	2	2	1.994	35777.1	AT4G36530.1;AT4G36530.2	4.69813	0.00905717	0.0240609	0.910739	AT4G36530.1;AT4G36530.2	4.68043	0.147193	0.205151	0.291397	AT4G36530.1;AT4G36530.2	4.18071	0.0406986	0.131306	0.614071	AT4G36530.1;AT4G36530.2	3.45021	0.019408	0.054704	0.780987	AT4G36530.1;AT4G36530.2	1.21921	0.659125	0.879255	0.0676026	AT4G36530.1;AT4G36530.2	0.888914	0.888408	0.981926	0.0517363	AT4G36530.1;AT4G36530.2	0.945126	0.907322	0.969718	0.0511941	AT4G36530.1;AT4G36530.2	1.00378	0.577143	0.879999	0.0792295	AT4G36530.1;AT4G36530.2	1.12376	0.501365
nucleus	AT4G28080.1	| Tetratricopeptide repeat (TPR)-like superfamily protein | Chr4:13948993-13957840 REVERSE LENGTH=1819 | 201606	38	31	41.551	199116	AT4G28080.1	4.69431	1.51746e-05	0.000392391	1	AT4G28080.1	4.12533	1.73611e-05	0.000289275	1	AT4G28080.1	3.5648	0.00123832	0.0218728	0.999915	AT4G28080.1	3.12161	7.66326e-05	0.00155907	1	AT4G28080.1	1.99269	0.000850731	0.0831426	0.99982	AT4G28080.1	1.75876	0.00138716	0.0820781	0.998811	AT4G28080.1	1.39917	0.00747738	0.567165	0.932901	AT4G28080.1	1.13792	0.0721816	0.656153	0.448685	AT4G28080.1	1.31685	0.0581513
plastid	AT5G28500.1	| rubisco accumulation factor-like protein | Chr5:10477810-10479114 FORWARD LENGTH=434 | 201606	8	8	10.912	48237.2	AT5G28500.1	4.68222	0.000316138	0.00236615	0.999999	AT5G28500.1	5.16912	0.000120362	0.000966319	1	AT5G28500.1	5.30419	0.0035076	0.0347516	0.993345	AT5G28500.1	3.96874	0.000552463	0.00503808	0.999977	AT5G28500.1	1.72245	0.0343315	0.349645	0.648422	AT5G28500.1	1.3288	0.619906	0.90581	0.0724189	AT5G28500.1	1.42078	0.0955165	0.742917	0.389891	AT5G28500.1	0.905807	0.220306	0.778246	0.211975	AT5G28500.1	0.88274	0.629491
peroxisome	AT3G14415.1;AT3G14415.3	| Aldolase-type TIM barrel family protein | Chr3:4818667-4820748 FORWARD LENGTH=367 | 201606 [AT3G14415.1,AT3G14415.3]	27	13	34.824	40307.7	AT3G14415.1;AT3G14415.3	4.67054	1.31538e-06	0.000107012	1	AT3G14415.1;AT3G14415.3	4.40353	6.27509e-08	1.21686e-05	1	AT3G14415.1;AT3G14415.3	3.35709	0.00618222	0.045907	0.970001	AT3G14415.1;AT3G14415.3	2.60626	4.02975e-05	0.0011055	1	AT3G14415.1;AT3G14415.3	1.53838	0.0197895	0.278218	0.776869	AT3G14415.1;AT3G14415.3	1.21827	0.000635332	0.0582119	0.999953	AT3G14415.1;AT3G14415.3	1.18414	0.0769159	0.742917	0.443041	AT3G14415.1;AT3G14415.3	1.06063	0.314518	0.796387	0.153491	AT3G14415.1;AT3G14415.3	1.39125	0.110132
peroxisome	AT5G26000.1;AT5G26000.2;AT5G25980.2	| thioglucoside glucohydrolase 1 | Chr5:9079678-9082347 REVERSE LENGTH=541 | 201606 [AT5G26000.1,AT5G26000.2]	18	16	18.891	61134.8	AT5G26000.1;AT5G26000.2;AT5G25980.2	4.64706	7.97736e-06	0.000270273	1	AT5G26000.1;AT5G26000.2;AT5G25980.2	3.96511	5.20746e-06	0.000136563	1	AT5G26000.1;AT5G26000.2;AT5G25980.2	2.98494	0.00108895	0.0214555	0.999959	AT5G26000.1;AT5G26000.2;AT5G25980.2	1.94974	0.000199746	0.00272879	1	AT5G26000.1;AT5G26000.2;AT5G25980.2	1.361	0.119318	0.525411	0.337752	AT5G26000.1;AT5G26000.2;AT5G25980.2	1.51681	0.00380446	0.130694	0.980738	AT5G26000.1;AT5G26000.2;AT5G25980.2	1.23539	0.114063	0.743909	0.348072	AT5G26000.1;AT5G26000.2;AT5G25980.2	1.17199	0.030921	0.559862	0.650101	AT5G26000.1;AT5G26000.2;AT5G25980.2	1.55684	0.00832461
cytosol	AT5G10240.1;AT5G10240.2	| asparagine synthetase 3 | Chr5:3212934-3216418 REVERSE LENGTH=578 | 201606 [AT5G10240.1,AT5G10240.2]	4	1	3.988	65228.5	AT5G10240.1;AT5G10240.2	4.63953	0.000632284	0.00368752	0.999954	AT5G10240.1;AT5G10240.2	2.93308	0.00194221	0.00654531	0.996512	AT5G10240.1;AT5G10240.2	2.50689	0.0251492	0.0983899	0.742339	AT5G10240.1;AT5G10240.2	1.83584	0.00164247	0.0100812	0.997917	AT5G10240.1;AT5G10240.2	0.824386	0.171468	0.596033	0.259674	AT5G10240.1;AT5G10240.2	1.2184	0.962422	0.992834	0.0501952	AT5G10240.1;AT5G10240.2	1.02342	0.765359	0.926967	0.0579351	AT5G10240.1;AT5G10240.2	1.58179	0.0730191	0.656153	0.445958	AT5G10240.1;AT5G10240.2	1.85071	0.0655855
	AT1G20020.2	| ferredoxin-NADP[+]-oxidoreductase 2 | Chr1:6943465-6944868 FORWARD LENGTH=255 | 201606	13	1	15.909	28694.7	AT1G20020.2	4.63912	0.00174576	0.00744917	0.997476	AT1G20020.2	4.13905	0.00212674	0.00699101	0.995463	AT1G20020.2	3.69132	0.018442	0.0821946	0.81528	AT1G20020.2	2.20854	0.0177126	0.0509995	0.799849	AT1G20020.2	1.17977	0.695245	0.893901	0.0638002	AT1G20020.2	1.29825	0.405907	0.803288	0.11699	AT1G20020.2	0.971949	0.974615	0.991392	0.050089	AT1G20020.2	1.12082	0.35668	0.803914	0.135314	AT1G20020.2	1.25676	0.239186
plastid	AT1G70070.1	| DEAD/DEAH box helicase | Chr1:26390016-26394148 REVERSE LENGTH=1171 | 201606	7	7	6.869	132442	AT1G70070.1	4.63612	0.00531769	0.0162857	0.962385	AT1G70070.1	4.41989	0.00555099	0.0143636	0.959321	AT1G70070.1	5.73177	0.011781	0.0643796	0.899312	AT1G70070.1	4.49685	0.00349163	0.0167646	0.98406	AT1G70070.1	1.71927	0.313027	0.69987	0.153087	AT1G70070.1	1.54816	0.203322	0.67623	0.226406	AT1G70070.1	1.5502	0.143457	0.756274	0.296909	AT1G70070.1	1.04892	0.849612	0.962218	0.0532611	AT1G70070.1	0.808845	0.481911
cytosol	AT4G34270.1	| TIP41-like family protein | Chr4:16404138-16406153 REVERSE LENGTH=290 | 201606	4	4	4.934	33075.2	AT4G34270.1	4.62843	0.203602	0.282629	0.226146	AT4G34270.1	4.32601	0.0054478	0.0141833	0.960682	AT4G34270.1	1.1044	0.797323	0.865072	0.0553596	AT4G34270.1	0.807487	0.221627	0.334414	0.210478	AT4G34270.1	1.02477	0.581596	0.844698	0.0779033	AT4G34270.1	1.12169	0.840415	0.965723	0.0535865	AT4G34270.1	1.37152	0.63024	0.883637	0.0710756	AT4G34270.1	1.06991	0.712999	0.922018	0.0624348	AT4G34270.1	4.19089	0.214726
cytosol	AT1G73600.1;AT1G73600.2	| S-adenosyl-L-methionine-dependent methyltransferases superfamily protein | Chr1:27670825-27673400 FORWARD LENGTH=490 | 201606 [AT1G73600.1,AT1G73600.2]	8	7	7.804	56369.7	AT1G73600.1;AT1G73600.2	4.62535	0.000109233	0.00123361	1	AT1G73600.1;AT1G73600.2	2.18042	0.00550432	0.0142938	0.959937	AT1G73600.1;AT1G73600.2	0.975544	0.865777	0.911892	0.0523074	AT1G73600.1;AT1G73600.2	1.30883	0.923431	0.948198	0.0508133	AT1G73600.1;AT1G73600.2	1.50982	0.0637766	0.431575	0.490365	AT1G73600.1;AT1G73600.2	1.28199	0.246538	0.712429	0.191663	AT1G73600.1;AT1G73600.2	2.08924	0.183233	0.763824	0.24644	AT1G73600.1;AT1G73600.2	2.12132	0.000254998	0.143961	0.999989	AT1G73600.1;AT1G73600.2	4.74131	0.000325014
plastid	AT1G74470.1	| Pyridine nucleotide-disulfide oxidoreductase family protein | Chr1:27991248-27992845 FORWARD LENGTH=467 | 201606	19	19	22.882	51838.8	AT1G74470.1	4.61354	1.04007e-06	9.38761e-05	1	AT1G74470.1	4.46379	7.79914e-07	4.4504e-05	1	AT1G74470.1	4.40868	8.90271e-05	0.00710322	1	AT1G74470.1	3.24143	7.8135e-06	0.000491515	1	AT1G74470.1	1.7252	0.0765619	0.459216	0.444194	AT1G74470.1	1.30602	0.0142879	0.250337	0.840861	AT1G74470.1	1.19449	0.0478618	0.742917	0.564029	AT1G74470.1	1.03355	0.485305	0.844434	0.0968092	AT1G74470.1	1.04647	0.55067
plastid	AT1G16880.1	| uridylyltransferase-like protein | Chr1:5773796-5776125 FORWARD LENGTH=290 | 201606	8	7	7.969	31295.8	AT1G16880.1	4.6024	8.35326e-05	0.00108018	1	AT1G16880.1	4.50287	6.13952e-06	0.000156005	1	AT1G16880.1	3.13691	0.000598712	0.0155461	0.999999	AT1G16880.1	2.60946	0.000188157	0.00264147	1	AT1G16880.1	1.36966	0.023621	0.303149	0.73792	AT1G16880.1	1.27616	0.0279677	0.351448	0.698519	AT1G16880.1	1.02283	0.705827	0.90467	0.062792	AT1G16880.1	1.0221	0.923304	0.983525	0.0508377	AT1G16880.1	1.46717	0.0292161
plastid	AT3G56650.1	| thylakoid lumenal protein (Mog1/PsbP/DUF1795-like photosystem II reaction center PsbP family protein) | Chr3:20984807-20985913 FORWARD LENGTH=262 | 201606	5	4	6.979	28630.3	AT3G56650.1	4.59587	0.00130899	0.00610303	0.999029	AT3G56650.1	5.62763	0.000151059	0.00111414	1	AT3G56650.1	5.18167	0.00110257	0.0216341	0.999956	AT3G56650.1	3.60932	0.000866993	0.00677855	0.999804	AT3G56650.1	1.78052	0.0695184	0.446569	0.468467	AT3G56650.1	1.55041	0.0877763	0.523567	0.410385	AT3G56650.1	1.40694	0.336166	0.806284	0.142557	AT3G56650.1	0.816662	0.17705	0.754059	0.25264	AT3G56650.1	0.886949	0.43333
extracellular	AT3G56630.1;AT1G34540.1	| cytochrome P450%2C family 94%2C subfamily D%2C polypeptide 2 | Chr3:20978953-20980512 FORWARD LENGTH=499 | 201606	2	2	1.994	57129.2	AT3G56630.1;AT1G34540.1	4.58573	0.0565193	0.0990111	0.521288	AT3G56630.1;AT1G34540.1	3.09019	0.063701	0.101833	0.490668	AT3G56630.1;AT1G34540.1	12.6676	0.07908	0.192381	0.432054	AT3G56630.1;AT1G34540.1	11.5776	0.0392722	0.0914253	0.614595	AT3G56630.1;AT1G34540.1	4.00898	0.0636552	0.431575	0.490851	AT3G56630.1;AT1G34540.1	4.87755	0.317952	0.754709	0.150742	AT3G56630.1;AT1G34540.1	4.56583	0.0534344	0.742917	0.53571	AT3G56630.1;AT1G34540.1	1.48396	0.427447	0.823526	0.111611	AT3G56630.1;AT1G34540.1	0.362005	0.14401
plastid	AT3G20680.1	| plant/protein (DUF1995) | Chr3:7230147-7231163 REVERSE LENGTH=338 | 201606	4	3	3.987	37437.8	AT3G20680.1	4.58379	0.0527115	0.0932729	0.539213	AT3G20680.1	3.10633	0.0189278	0.03724	0.786236	AT3G20680.1	1.88397	0.0686031	0.176184	0.469923	AT3G20680.1	1.78605	0.0559534	0.118432	0.523872	AT3G20680.1	1.24822	0.931688	0.978676	0.0506468	AT3G20680.1	0.560635	0.106534	0.562576	0.363955	AT3G20680.1	1.05845	0.931243	0.980965	0.0506553	AT3G20680.1	1.47563	0.632569	0.896881	0.0712664	AT3G20680.1	2.43305	0.241253
plastid	AT5G27560.1;AT5G27560.2;AT5G27560.3;AT5G27560.4	| DUF1995 domain protein%2C putative (DUF1995) | Chr5:9731758-9733644 FORWARD LENGTH=341 | 201606 [AT5G27560.1,AT5G27560.2,AT5G27560.3,AT5G27560.4]	4	4	3.98	38046.8	AT5G27560.1;AT5G27560.2;AT5G27560.3;AT5G27560.4	4.58321	0.000107377	0.00122626	1	AT5G27560.1;AT5G27560.2;AT5G27560.3;AT5G27560.4	5.21497	2.75842e-05	0.000380931	1	AT5G27560.1;AT5G27560.2;AT5G27560.3;AT5G27560.4	2.50558	0.0250218	0.098242	0.743612	AT5G27560.1;AT5G27560.2;AT5G27560.3;AT5G27560.4	2.30443	0.00108964	0.00773399	0.999507	AT5G27560.1;AT5G27560.2;AT5G27560.3;AT5G27560.4	1.60957	0.0162593	0.266072	0.816768	AT5G27560.1;AT5G27560.2;AT5G27560.3;AT5G27560.4	1.29817	0.161516	0.644916	0.271889	AT5G27560.1;AT5G27560.2;AT5G27560.3;AT5G27560.4	1.20994	0.385392	0.817239	0.12369	AT5G27560.1;AT5G27560.2;AT5G27560.3;AT5G27560.4	0.878857	0.117886	0.714775	0.336609	AT5G27560.1;AT5G27560.2;AT5G27560.3;AT5G27560.4	1.8292	0.023108
plastid	AT5G49910.1	| chloroplast heat shock protein 70-2 | Chr5:20303470-20306295 FORWARD LENGTH=718 | 201606	41	15	49.63	76997.5	AT5G49910.1	4.57629	4.10681e-05	0.000708376	1	AT5G49910.1	4.15282	1.15796e-05	0.000221773	1	AT5G49910.1	3.84744	0.00116717	0.0218072	0.999939	AT5G49910.1	2.66062	3.13175e-05	0.000976414	1	AT5G49910.1	1.53373	0.0408378	0.37635	0.60466	AT5G49910.1	1.49283	0.0162836	0.261051	0.816479	AT5G49910.1	1.07191	0.573876	0.870619	0.0791112	AT5G49910.1	1.10197	0.380702	0.804409	0.126437	AT5G49910.1	1.18944	0.288242
plastid	AT1G20810.2	| FKBP-like peptidyl-prolyl cis-trans isomerase family protein | Chr1:7232025-7233235 FORWARD LENGTH=229 | 201606	3	2	2.971	25477.8	AT1G20810.2	4.55983	0.0095167	0.024853	0.904326	AT1G20810.2	3.26213	0.031091	0.0556942	0.672913	AT1G20810.2	3.60329	0.0385473	0.126249	0.629068	AT1G20810.2	1.68659	0.276832	0.397306	0.172309	AT1G20810.2	1.17489	0.620115	0.859662	0.0723911	AT1G20810.2	1.07325	0.551103	0.882838	0.0828933	AT1G20810.2	0.980995	0.810765	0.941735	0.0550836	AT1G20810.2	1.3978	0.134487	0.727088	0.308339	AT1G20810.2	1.26546	0.196934
plastid	AT4G33350.1	| Tic22-like family protein | Chr4:16064638-16066715 REVERSE LENGTH=268 | 201606	2	2	1.994	30106.3	AT4G33350.1	4.55683	0.000222297	0.00188522	1	AT4G33350.1	4.90233	0.000367101	0.00198258	0.999998	AT4G33350.1	3.49097	0.0017814	0.025183	0.999481	AT4G33350.1	2.89738	0.000816004	0.0065101	0.999849	AT4G33350.1	1.69285	0.210762	0.626123	0.21969	AT4G33350.1	1.48143	0.127647	0.605751	0.322529	AT4G33350.1	1.39073	0.0594159	0.742917	0.508469	AT4G33350.1	0.929525	0.663999	0.904789	0.0674645	AT4G33350.1	1.30532	0.06416
golgi	AT5G65010.1;AT5G65010.2	| asparagine synthetase 2 | Chr5:25969224-25972278 FORWARD LENGTH=578 | 201606 [AT5G65010.1,AT5G65010.2]	10	6	11.956	65031.8	AT5G65010.1;AT5G65010.2	4.5438	0.000150814	0.00150812	1	AT5G65010.1;AT5G65010.2	3.20786	0.000549982	0.00263929	0.999977	AT5G65010.1;AT5G65010.2	2.72915	0.0189252	0.0834933	0.809608	AT5G65010.1;AT5G65010.2	1.83668	0.00381066	0.0175697	0.98067	AT5G65010.1;AT5G65010.2	1.15887	0.339524	0.72044	0.141126	AT5G65010.1;AT5G65010.2	0.751683	0.116047	0.582221	0.344105	AT5G65010.1;AT5G65010.2	0.97748	0.86732	0.95966	0.0524642	AT5G65010.1;AT5G65010.2	1.41646	0.0263508	0.544262	0.686259	AT5G65010.1;AT5G65010.2	1.66492	0.0470427
plastid	AT1G31800.1	| cytochrome P450%2C family 97%2C subfamily A%2C polypeptide 3 | Chr1:11396440-11399470 FORWARD LENGTH=595 | 201606	7	7	6.944	66848.6	AT1G31800.1	4.45021	6.12938e-05	0.000889986	1	AT1G31800.1	4.59293	0.000214683	0.00138798	1	AT1G31800.1	3.703	0.000653231	0.0162271	0.999999	AT1G31800.1	2.62968	0.000349064	0.0037157	0.999998	AT1G31800.1	1.29719	0.137184	0.553122	0.306608	AT1G31800.1	1.08589	0.532772	0.874115	0.0861906	AT1G31800.1	0.987505	0.944708	0.982868	0.0504232	AT1G31800.1	0.968927	0.863505	0.966191	0.0526784	AT1G31800.1	1.20178	0.0300322
plastid	AT4G14870.1	| secE/sec61-gamma protein transport protein | Chr4:8517248-8517781 FORWARD LENGTH=177 | 201606	4	3	3.988	19120.6	AT4G14870.1	4.43798	0.000167041	0.00161082	1	AT4G14870.1	4.60317	5.74703e-05	0.000594387	1	AT4G14870.1	2.17112	0.213041	0.354279	0.208977	AT4G14870.1	2.17556	0.00220222	0.0123939	0.994995	AT4G14870.1	1.28049	0.185586	0.604164	0.243936	AT4G14870.1	1.08097	0.708674	0.930924	0.0625286	AT4G14870.1	0.926757	0.634509	0.8849	0.0705366	AT4G14870.1	0.964114	0.729223	0.926387	0.0609903	AT4G14870.1	2.04409	0.0655118
plastid	AT3G55400.1	| methionyl-tRNA synthetase / methionine-tRNA ligase / MetRS (cpMetRS) | Chr3:20535809-20538999 REVERSE LENGTH=616 | 201606	7	7	6.867	69275.9	AT3G55400.1	4.42115	0.00404788	0.0132633	0.978016	AT3G55400.1	7.04252	2.52841e-05	0.000362977	1	AT3G55400.1	7.25544	0.00214805	0.0270878	0.998843	AT3G55400.1	4.84641	2.61011e-06	0.000277122	1	AT3G55400.1	1.03981	0.705965	0.898275	0.0627792	AT3G55400.1	1.04829	0.934066	0.988941	0.0506024	AT3G55400.1	1.16938	0.396183	0.818738	0.120091	AT3G55400.1	0.62778	0.0799466	0.669977	0.424646	AT3G55400.1	0.609357	0.210534
plastid	AT4G01050.1;AT4G01050.2	| thylakoid rhodanese-like protein | Chr4:455874-458175 FORWARD LENGTH=466 | 201606 [AT4G01050.1,AT4G01050.2]	9	8	8.825	49388.8	AT4G01050.1;AT4G01050.2	4.41799	3.4943e-06	0.000187804	1	AT4G01050.1;AT4G01050.2	3.8595	8.23506e-07	4.54897e-05	1	AT4G01050.1;AT4G01050.2	3.0601	0.00396203	0.0364323	0.990408	AT4G01050.1;AT4G01050.2	2.29519	2.97702e-05	0.000953164	1	AT4G01050.1;AT4G01050.2	1.15405	0.172574	0.597526	0.258376	AT4G01050.1;AT4G01050.2	1.13665	0.0604189	0.471658	0.504182	AT4G01050.1;AT4G01050.2	0.937881	0.235611	0.78383	0.199553	AT4G01050.1;AT4G01050.2	1.1447	0.0307935	0.559862	0.65105	AT4G01050.1;AT4G01050.2	1.44374	0.053141
plastid	AT1G12250.1	| Pentapeptide repeat-containing protein | Chr1:4159287-4161269 FORWARD LENGTH=280 | 201606	8	7	7.976	30065.9	AT1G12250.1	4.39772	7.55022e-05	0.00101495	1	AT1G12250.1	3.9451	4.57919e-05	0.000518295	1	AT1G12250.1	3.74781	0.00148718	0.0231127	0.999779	AT1G12250.1	2.26328	0.000274819	0.00321804	1	AT1G12250.1	1.03243	0.686303	0.889063	0.0646886	AT1G12250.1	1.04576	0.830034	0.964873	0.0540791	AT1G12250.1	0.76535	0.182129	0.763824	0.247632	AT1G12250.1	1.11473	0.339752	0.802699	0.142178	AT1G12250.1	1.17341	0.315341
plastid	AT1G15710.1;AT5G34930.1;AT5G34930.2;AT5G34930.3	| prephenate dehydrogenase family protein | Chr1:5404505-5405581 FORWARD LENGTH=358 | 201606	2	2	1.994	40634.8	AT1G15710.1;AT5G34930.1;AT5G34930.2;AT5G34930.3	4.38028	0.0282217	0.0575532	0.696357	AT1G15710.1;AT5G34930.1;AT5G34930.2;AT5G34930.3	3.42335	0.0309643	0.0554869	0.673912	AT1G15710.1;AT5G34930.1;AT5G34930.2;AT5G34930.3	2.85538	0.145338	0.279246	0.285126	AT1G15710.1;AT5G34930.1;AT5G34930.2;AT5G34930.3	1.60543	0.396588	0.514673	0.119959	AT1G15710.1;AT5G34930.1;AT5G34930.2;AT5G34930.3	0.652816	0.492872	0.8036	0.0942402	AT1G15710.1;AT5G34930.1;AT5G34930.2;AT5G34930.3	1.06233	0.913754	0.985505	0.0510332	AT1G15710.1;AT5G34930.1;AT5G34930.2;AT5G34930.3	0.986514	0.894793	0.965395	0.0515416	AT1G15710.1;AT5G34930.1;AT5G34930.2;AT5G34930.3	1.27953	0.40937	0.815817	0.116999	AT1G15710.1;AT5G34930.1;AT5G34930.2;AT5G34930.3	1.53404	0.249534
plastid	AT4G17300.1;AT4G17300.2	| Class II aminoacyl-tRNA and biotin synthetases superfamily protein | Chr4:9681558-9684833 FORWARD LENGTH=567 | 201606 [AT4G17300.1,AT4G17300.2]	5	3	4.893	63700	AT4G17300.1;AT4G17300.2	4.37623	0.144654	0.213701	0.295122	AT4G17300.1;AT4G17300.2	5.45681	0.104052	0.153038	0.369502	AT4G17300.1;AT4G17300.2	7.75608	0.145479	0.279264	0.284916	AT4G17300.1;AT4G17300.2	4.16348	0.125339	0.217175	0.326615	AT4G17300.1;AT4G17300.2	2.10571	0.228978	0.64008	0.204612	AT4G17300.1;AT4G17300.2	2.18266	0.201166	0.674966	0.228418	AT4G17300.1;AT4G17300.2	2.38738	0.184935	0.763824	0.244625	AT4G17300.1;AT4G17300.2	0.801976	0.358249	0.803914	0.134704	AT4G17300.1;AT4G17300.2	0.564232	0.192544
plastid	AT1G54500.1	| Rubredoxin-like superfamily protein | Chr1:20357084-20357671 REVERSE LENGTH=195 | 201606	4	4	3.981	21875.4	AT1G54500.1	4.35546	0.000543587	0.00338129	0.999978	AT1G54500.1	4.29244	3.74729e-06	0.000111367	1	AT1G54500.1	3.15968	0.00859262	0.0541389	0.941081	AT1G54500.1	2.51423	8.04463e-07	0.00019468	1	AT1G54500.1	1.27091	0.0182968	0.273993	0.793245	AT1G54500.1	1.13489	0.125574	0.603454	0.326196	AT1G54500.1	0.934126	0.0550201	0.742917	0.528193	AT1G54500.1	1.01468	0.93862	0.987191	0.0505357	AT1G54500.1	1.37845	0.261017
mitochondrion	AT4G30930.1	| Ribosomal protein L21 | Chr4:15050170-15051630 REVERSE LENGTH=270 | 201606	2	1	1.994	30908.2	AT4G30930.1	4.34953	0.224476	0.306663	0.208171	AT4G30930.1	5.23981	0.063498	0.101573	0.491481	AT4G30930.1	3.78207	0.182468	0.323102	0.238177	AT4G30930.1	3.17173	0.13071	0.224339	0.31725	AT4G30930.1	3.03917	0.141086	0.556556	0.300507	AT4G30930.1	2.39115	0.326924	0.759052	0.146617	AT4G30930.1	3.37371	0.129691	0.749717	0.318989	AT4G30930.1	0.830094	0.441448	0.829178	0.107706	AT4G30930.1	1.15004	0.830011
plastid	AT4G09350.1	| Chaperone DnaJ-domain superfamily protein | Chr4:5931317-5932152 REVERSE LENGTH=249 | 201606	2	2	1.985	28497.3	AT4G09350.1	4.34362	0.134498	0.201094	0.310941	AT4G09350.1	4.31352	0.154479	0.213564	0.281167	AT4G09350.1	1.17393	0.369191	0.513052	0.123869	AT4G09350.1	0.565523	0.612541	0.708935	0.0734102	AT4G09350.1	0.139603	0.711845	0.8999	0.062239	AT4G09350.1	0.25381	0.937263	0.989646	0.0505452	AT4G09350.1	0.756611	0.556026	0.861796	0.0820473	AT4G09350.1	1.00698	0.735523	0.928659	0.0604572	AT4G09350.1	3.70007	0.0536913
extracellular	AT1G28600.1	| GDSL-like Lipase/Acylhydrolase superfamily protein | Chr1:10051228-10053073 REVERSE LENGTH=393 | 201606	3	3	2.902	43612	AT1G28600.1	4.33972	0.566027	0.64569	0.0803772	AT1G28600.1	0.668316	0.166725	0.22734	0.265371	AT1G28600.1	1.03551	0.84222	0.897874	0.0532059	AT1G28600.1	0.607354	0.0133915	0.0416125	0.852251	AT1G28600.1	0.646691	0.0928314	0.476673	0.396768	AT1G28600.1	0.827213	0.373009	0.786895	0.12804	AT1G28600.1	0.71136	0.0979999	0.742917	0.383736	AT1G28600.1	6.49351	0.244485	0.780988	0.193836	AT1G28600.1	4.19091	0.592961
endoplasmic reticulum	AT5G45160.1	| Root hair defective 3 GTP-binding protein (RHD3) | Chr5:18264991-18270035 FORWARD LENGTH=834 | 201606	4	3	3.927	93572.2	AT5G45160.1	4.33457	0.000451331	0.00297107	0.999992	AT5G45160.1	2.93894	0.00442555	0.0120917	0.973592	AT5G45160.1	2.01282	0.0180942	0.0814482	0.819401	AT5G45160.1	0.692285	0.216856	0.328876	0.21444	AT5G45160.1	0.888765	0.630144	0.865192	0.0710878	AT5G45160.1	0.876476	0.572842	0.890731	0.0792758	AT5G45160.1	0.95076	0.905921	0.969392	0.0512307	AT5G45160.1	1.47487	0.0449925	0.605067	0.56181	AT5G45160.1	2.15348	0.00100465
plastid	AT2G22360.1	| DNAJ heat shock family protein | Chr2:9498162-9500459 FORWARD LENGTH=442 | 201606	3	3	2.979	47762	AT2G22360.1	4.32954	2.66041e-05	0.000557879	1	AT2G22360.1	3.92838	0.000426683	0.00221266	0.999994	AT2G22360.1	3.43471	0.00465665	0.0393627	0.984993	AT2G22360.1	2.67105	0.00244817	0.0133494	0.993321	AT2G22360.1	1.95689	0.00398962	0.136889	0.978677	AT2G22360.1	1.28005	0.384205	0.792962	0.124097	AT2G22360.1	0.965937	0.771993	0.928365	0.0574745	AT2G22360.1	1.10212	0.42972	0.824494	0.110962	AT2G22360.1	1.26052	0.189623
plastid	AT3G04550.1	| rubisco accumulation factor-like protein | Chr3:1225961-1227310 FORWARD LENGTH=449 | 201606	7	7	7.92	50200.5	AT3G04550.1	4.31502	0.00236973	0.00908335	0.993879	AT3G04550.1	4.60222	0.000229303	0.0014494	1	AT3G04550.1	3.17787	0.00862839	0.0541389	0.940624	AT3G04550.1	2.2538	0.00438402	0.0194751	0.974089	AT3G04550.1	1.51652	0.142725	0.556972	0.298011	AT3G04550.1	1.28196	0.146251	0.63122	0.292768	AT3G04550.1	1.18569	0.375194	0.8138	0.127255	AT3G04550.1	0.937597	0.570575	0.878246	0.0802911	AT3G04550.1	1.35784	0.273515
plastid	AT1G30380.1	| photosystem I subunit K | Chr1:10722325-10723013 FORWARD LENGTH=130 | 201606	2	2	1.993	13207	AT1G30380.1	4.31482	0.910959	0.933366	0.0511016	AT1G30380.1	6.58877	0.000327335	0.00182907	0.999999	AT1G30380.1	4.82333	0.0642058	0.169152	0.487889	AT1G30380.1	1.29977	0.258367	0.376545	0.183696	AT1G30380.1	0.846938	0.671411	0.884254	0.0662447	AT1G30380.1	0.46425	0.0696236	0.488954	0.468085	AT1G30380.1	0.742061	0.454328	0.836859	0.103328	AT1G30380.1	0.654875	0.213346	0.778165	0.217731	AT1G30380.1	0.894574	0.463431
cytosol	AT1G55290.1;AT3G13610.1	| 2-oxoglutarate (2OG) and Fe(II)-dependent oxygenase superfamily protein | Chr1:20626208-20627397 REVERSE LENGTH=361 | 201606	2	2	1.82	40876	AT1G55290.1;AT3G13610.1	4.31461	5.54377e-06	0.000219464	1	AT1G55290.1;AT3G13610.1	4.1536	9.62159e-06	0.000198383	1	AT1G55290.1;AT3G13610.1	3.37655	0.00599553	0.0452375	0.972019	AT1G55290.1;AT3G13610.1	2.1823	0.000175066	0.00249254	1	AT1G55290.1;AT3G13610.1	0.9361	0.37596	0.744218	0.126981	AT1G55290.1;AT3G13610.1	1.02921	0.887293	0.981926	0.0517715	AT1G55290.1;AT3G13610.1	0.645662	0.124535	0.747071	0.328063	AT1G55290.1;AT3G13610.1	1.03876	0.620197	0.896813	0.072898	AT1G55290.1;AT3G13610.1	1.27781	0.193535
plastid	AT2G47940.1	| DEGP protease 2 | Chr2:19618372-19622164 REVERSE LENGTH=607 | 201606	7	7	6.918	66802.2	AT2G47940.1	4.30983	2.10324e-06	0.000138316	1	AT2G47940.1	4.19741	1.72923e-06	7.22883e-05	1	AT2G47940.1	3.7821	0.000138758	0.00890255	1	AT2G47940.1	3.01481	5.07744e-05	0.00124777	1	AT2G47940.1	1.65367	0.0292617	0.33056	0.687656	AT2G47940.1	1.54049	0.00617349	0.162503	0.950959	AT2G47940.1	1.23946	0.0216698	0.651632	0.757222	AT2G47940.1	1.02678	0.505213	0.848591	0.0924523	AT2G47940.1	1.13953	0.108609
cytosol	AT1G37130.1	| nitrate reductase 2 | Chr1:14158617-14161652 FORWARD LENGTH=917 | 201606	13	12	13.917	102846	AT1G37130.1	4.30566	0.000532608	0.00334575	0.999981	AT1G37130.1	3.91562	0.00249732	0.00785845	0.992961	AT1G37130.1	3.61761	0.0030234	0.031615	0.995885	AT1G37130.1	3.38912	0.000825959	0.0065484	0.999841	AT1G37130.1	1.8138	0.0173066	0.267332	0.804504	AT1G37130.1	1.5231	0.071956	0.491793	0.459766	AT1G37130.1	1.11539	0.638194	0.885796	0.0700787	AT1G37130.1	1.09961	0.499761	0.847822	0.0936119	AT1G37130.1	1.1902	0.10874
plastid	AT4G24770.1;AT4G24770.2	| 31-kDa RNA binding protein | Chr4:12766223-12767952 REVERSE LENGTH=329 | 201606 [AT4G24770.1,AT4G24770.2]	10	10	11.942	35786.9	AT4G24770.1;AT4G24770.2	4.30066	6.6795e-06	0.000237379	1	AT4G24770.1;AT4G24770.2	3.9395	0.000285155	0.00169492	1	AT4G24770.1;AT4G24770.2	4.34105	0.000918199	0.0195242	0.999986	AT4G24770.1;AT4G24770.2	3.74974	8.81664e-06	0.000527131	1	AT4G24770.1;AT4G24770.2	2.04632	0.000132103	0.0369024	1	AT4G24770.1;AT4G24770.2	1.62699	0.0128965	0.238674	0.858656	AT4G24770.1;AT4G24770.2	1.3568	0.00282373	0.44641	0.990359	AT4G24770.1;AT4G24770.2	1.09168	0.45064	0.832686	0.105261	AT4G24770.1;AT4G24770.2	0.990694	0.948922
extracellular	AT5G24460.1	| RING-H2 zinc finger protein | Chr5:8354815-8355717 FORWARD LENGTH=300 | 201606	2	2	1.988	33449.2	AT5G24460.1	4.29665	0.576566	0.65463	0.0786863	AT5G24460.1	5.10052	0.0220796	0.0419786	0.753078	AT5G24460.1	2.06153	0.386731	0.52977	0.118013	AT5G24460.1	2.08841	0.132687	0.227042	0.313929	AT5G24460.1	1.22628	0.846219	0.950094	0.0533257	AT5G24460.1	1.05336	0.632701	0.908223	0.0707638	AT5G24460.1	0.847311	0.571508	0.87048	0.0794891	AT5G24460.1	0.842395	0.43092	0.824494	0.110621	AT5G24460.1	2.0842	0.959413
plastid	AT1G77090.1	| thylakoid lumenal protein (Mog1/PsbP/DUF1795-like photosystem II reaction center PsbP family protein) | Chr1:28960576-28961875 REVERSE LENGTH=260 | 201606	6	6	5.982	28501.5	AT1G77090.1	4.28076	9.81606e-06	0.000314725	1	AT1G77090.1	4.04921	1.37083e-06	6.39134e-05	1	AT1G77090.1	3.01931	0.0194092	0.0844498	0.803992	AT1G77090.1	2.33813	2.1932e-05	0.000774017	1	AT1G77090.1	1.313	0.104035	0.496093	0.369539	AT1G77090.1	1.20397	0.0456341	0.429613	0.576267	AT1G77090.1	0.832395	0.0954565	0.742917	0.390042	AT1G77090.1	1.05718	0.404378	0.814421	0.11856	AT1G77090.1	1.41779	0.140696
extracellular	AT2G22990.4	| sinapoylglucose 1 | Chr2:9786393-9789870 FORWARD LENGTH=416 | 201606	7	7	8.858	47585.8	AT2G22990.4	4.26267	1.43636e-05	0.000384789	1	AT2G22990.4	4.32715	1.03094e-05	0.00020546	1	AT2G22990.4	4.25319	0.000891094	0.0192413	0.999988	AT2G22990.4	2.89613	3.77242e-05	0.00108929	1	AT2G22990.4	1.55109	0.0229673	0.298517	0.744268	AT2G22990.4	1.17994	0.437444	0.81783	0.10778	AT2G22990.4	1.02293	0.912452	0.971523	0.0510648	AT2G22990.4	0.985099	0.780647	0.941334	0.0570731	AT2G22990.4	1.00223	0.889604
nucleus	AT2G34740.1	| protein phosphatase 2C family protein | Chr2:14658730-14660305 FORWARD LENGTH=339 | 201606	2	1	1.994	37880.7	AT2G34740.1	4.24957	0.134683	0.201193	0.310639	AT2G34740.1	5.03728	0.0879739	0.132902	0.409835	AT2G34740.1	3.23169	0.136022	0.269393	0.299679	AT2G34740.1	2.7836	0.179689	0.285995	0.250299	AT2G34740.1	1.05927	0.200272	0.620066	0.229261	AT2G34740.1	5.50902	0.110348	0.568677	0.355739	AT2G34740.1	3.63249	0.0989048	0.742917	0.38154	AT2G34740.1	0.843623	0.703564	0.919189	0.0633237	AT2G34740.1	1.31497	0.744651
plastid	AT3G27160.1	| Ribosomal protein S21 family protein | Chr3:10017531-10018854 FORWARD LENGTH=183 | 201606	5	5	6.955	20911.8	AT3G27160.1	4.23913	3.47548e-05	0.000644613	1	AT3G27160.1	3.52433	0.00212541	0.00699101	0.995471	AT3G27160.1	1.17736	0.858496	0.907798	0.0525686	AT3G27160.1	1.41206	0.0679551	0.135548	0.474227	AT3G27160.1	1.12863	0.546563	0.829639	0.0836883	AT3G27160.1	1.18565	0.535027	0.876567	0.0857722	AT3G27160.1	0.689275	0.0918101	0.742917	0.399447	AT3G27160.1	1.20282	0.291191	0.796387	0.165287	AT3G27160.1	3.60055	0.0242181
plastid	AT3G55040.1	| glutathione transferase lambda 2 | Chr3:20398718-20400305 REVERSE LENGTH=292 | 201606	7	7	7.968	33058.6	AT3G55040.1	4.2355	0.000121137	0.00132151	1	AT3G55040.1	5.27467	0.000406072	0.00213408	0.999996	AT3G55040.1	3.50724	0.0102584	0.0602001	0.919419	AT3G55040.1	2.30793	0.00106257	0.00761631	0.999552	AT3G55040.1	1.38224	0.232107	0.64107	0.202198	AT3G55040.1	1.30472	0.0755771	0.497696	0.447433	AT3G55040.1	0.905457	0.62542	0.882796	0.0716953	AT3G55040.1	0.802989	0.223933	0.778246	0.209077	AT3G55040.1	1.20764	0.298344
plastid	AT2G33800.1	| Ribosomal protein S5 family protein | Chr2:14300925-14302352 REVERSE LENGTH=303 | 201606	9	9	8.877	32645.2	AT2G33800.1	4.23216	7.87224e-07	8.33474e-05	1	AT2G33800.1	4.07946	7.78394e-07	4.4504e-05	1	AT2G33800.1	4.16696	3.3339e-05	0.00529465	1	AT2G33800.1	3.12747	1.37e-05	0.000613617	1	AT2G33800.1	1.62718	0.0194425	0.276975	0.780612	AT2G33800.1	1.53127	0.00037595	0.0508637	0.999997	AT2G33800.1	1.25118	0.010261	0.593805	0.894018	AT2G33800.1	1.03743	0.28172	0.796213	0.170498	AT2G33800.1	1.01565	0.744532
plastid	AT1G32440.1	| plastidial pyruvate kinase 3 | Chr1:11712205-11714963 FORWARD LENGTH=571 | 201606	4	2	3.987	62615.8	AT1G32440.1	4.22942	5.65717e-06	0.000219464	1	AT1G32440.1	3.79613	1.93804e-05	0.000312366	1	AT1G32440.1	2.2218	0.0181549	0.0815767	0.81868	AT1G32440.1	1.87412	0.00257135	0.0137409	0.992402	AT1G32440.1	1.5716	0.0732035	0.454237	0.45544	AT1G32440.1	1.16008	0.132795	0.616643	0.313748	AT1G32440.1	1.1911	0.0871602	0.742917	0.412108	AT1G32440.1	1.11414	0.114966	0.711502	0.342096	AT1G32440.1	1.9036	0.0084135
cytosol	AT1G49660.1;AT1G49640.1	| carboxyesterase 5 | Chr1:18378777-18379736 REVERSE LENGTH=319 | 201606	6	4	5.964	35197.3	AT1G49660.1;AT1G49640.1	4.21626	4.01869e-06	0.00019267	1	AT1G49660.1;AT1G49640.1	2.95716	0.0291996	0.0527712	0.688168	AT1G49660.1;AT1G49640.1	2.48319	0.0175759	0.0802325	0.825607	AT1G49660.1;AT1G49640.1	2.52115	6.27748e-05	0.0013934	1	AT1G49660.1;AT1G49640.1	1.55138	0.0115038	0.2282	0.877093	AT1G49660.1;AT1G49640.1	1.63211	0.000821878	0.0662312	0.999845	AT1G49660.1;AT1G49640.1	1.29629	0.0206715	0.642303	0.76752	AT1G49660.1;AT1G49640.1	1.42578	0.159714	0.74039	0.272955	AT1G49660.1;AT1G49640.1	1.69792	0.0276584
	AT1G72640.2;AT1G72640.3	| NAD(P)-binding Rossmann-fold superfamily protein | Chr1:27346409-27348147 REVERSE LENGTH=311 | 201606 [AT1G72640.2,AT1G72640.3]	3	1	2.954	33565.2	AT1G72640.2;AT1G72640.3	4.20016	0.019731	0.0433144	0.777497	AT1G72640.2;AT1G72640.3	6.64137	0.00967207	0.0219533	0.902166	AT1G72640.2;AT1G72640.3	3.56511	0.0448655	0.13827	0.587019	AT1G72640.2;AT1G72640.3	1.82637	0.116522	0.204547	0.343169	AT1G72640.2;AT1G72640.3	1.27283	0.536932	0.829639	0.0854216	AT1G72640.2;AT1G72640.3	0.763254	0.844061	0.965723	0.0534215	AT1G72640.2;AT1G72640.3	0.862916	0.970758	0.990045	0.0501182	AT1G72640.2;AT1G72640.3	0.632423	0.221321	0.778246	0.211157	AT1G72640.2;AT1G72640.3	1.17813	0.657994
plastid	AT5G65220.1	| Ribosomal L29 family protein | Chr5:26061301-26062506 FORWARD LENGTH=173 | 201606	3	3	3.988	19378	AT5G65220.1	4.19246	3.02018e-05	0.000599554	1	AT5G65220.1	3.51645	3.5791e-05	0.000452462	1	AT5G65220.1	2.17314	0.0817028	0.195608	0.423511	AT5G65220.1	1.56024	0.0155427	0.0466007	0.825372	AT5G65220.1	1.43827	0.0981248	0.484146	0.383431	AT5G65220.1	1.15108	0.321709	0.75586	0.148992	AT5G65220.1	0.830225	0.149348	0.760209	0.288301	AT5G65220.1	1.19224	0.0418113	0.596751	0.579328	AT5G65220.1	1.92922	0.0338817
plastid	AT4G11175.1	| Nucleic acid-binding%2C OB-fold-like protein | Chr4:6818162-6818806 FORWARD LENGTH=141 | 201606	3	3	2.989	15733.9	AT4G11175.1	4.19174	4.61497e-05	0.000751708	1	AT4G11175.1	3.7589	5.67312e-05	0.000589587	1	AT4G11175.1	3.72089	0.00134358	0.0226891	0.999869	AT4G11175.1	2.67777	0.00051406	0.00478459	0.999984	AT4G11175.1	1.74424	0.210224	0.625869	0.220164	AT4G11175.1	1.18607	0.245192	0.712429	0.192607	AT4G11175.1	1.00239	0.97448	0.991392	0.05009	AT4G11175.1	1.11515	0.0518604	0.625484	0.527723	AT4G11175.1	1.12654	0.260736
plastid	AT1G01790.1;AT1G01790.2	| K+ efflux antiporter 1 | Chr1:284781-290869 FORWARD LENGTH=1193 | 201606 [AT1G01790.1,AT1G01790.2]	12	10	13.884	128037	AT1G01790.1;AT1G01790.2	4.18956	0.000412922	0.00281974	0.999995	AT1G01790.1;AT1G01790.2	3.04852	2.64968e-05	0.000371754	1	AT1G01790.1;AT1G01790.2	2.65033	0.000415231	0.0133534	1	AT1G01790.1;AT1G01790.2	1.60079	0.00155672	0.00974293	0.998248	AT1G01790.1;AT1G01790.2	1.10933	0.470763	0.792019	0.0992797	AT1G01790.1;AT1G01790.2	0.957296	0.649329	0.911479	0.0687354	AT1G01790.1;AT1G01790.2	0.947055	0.610825	0.878587	0.0736454	AT1G01790.1;AT1G01790.2	1.37429	0.0800165	0.669977	0.424442	AT1G01790.1;AT1G01790.2	1.58077	0.0459415
plastid	AT1G19740.1	| ATP-dependent protease La (LON) domain protein | Chr1:6824396-6825232 FORWARD LENGTH=278 | 201606	2	1	1.994	31371.8	AT1G19740.1	4.16554	0.0025798	0.00963302	0.992337	AT1G19740.1	8.41935	0.0160488	0.0325807	0.819277	AT1G19740.1	3.84649	0.00468453	0.0393627	0.984754	AT1G19740.1	2.3968	0.00432421	0.0192769	0.974801	AT1G19740.1	5.66036	0.207443	0.625541	0.222643	AT1G19740.1	1.77006	0.0570278	0.462226	0.518988	AT1G19740.1	1.31208	0.428553	0.831072	0.110254	AT1G19740.1	0.494758	0.36557	0.803914	0.131917	AT1G19740.1	1.08295	0.800441
plastid	AT3G04870.1;AT3G04870.2;AT3G04870.3;AT3G04870.4	| zeta-carotene desaturase | Chr3:1342842-1346189 FORWARD LENGTH=558 | 201606 [AT3G04870.1,AT3G04870.2,AT3G04870.3,AT3G04870.4]	8	8	7.972	61636.2	AT3G04870.1;AT3G04870.2;AT3G04870.3;AT3G04870.4	4.16295	9.26995e-05	0.0011329	1	AT3G04870.1;AT3G04870.2;AT3G04870.3;AT3G04870.4	4.01237	3.4617e-06	0.000105991	1	AT3G04870.1;AT3G04870.2;AT3G04870.3;AT3G04870.4	3.40823	5.78496e-06	0.00251867	1	AT3G04870.1;AT3G04870.2;AT3G04870.3;AT3G04870.4	2.80831	3.17627e-05	0.000984256	1	AT3G04870.1;AT3G04870.2;AT3G04870.3;AT3G04870.4	1.58273	0.0982838	0.48446	0.383044	AT3G04870.1;AT3G04870.2;AT3G04870.3;AT3G04870.4	1.60694	0.00153327	0.0885464	0.998334	AT3G04870.1;AT3G04870.2;AT3G04870.3;AT3G04870.4	1.39763	0.125806	0.747071	0.32578	AT3G04870.1;AT3G04870.2;AT3G04870.3;AT3G04870.4	1.03753	0.837335	0.962218	0.0538263	AT3G04870.1;AT3G04870.2;AT3G04870.3;AT3G04870.4	1.22144	0.197345
plasma membrane	AT5G58140.1;AT5G58140.2;AT5G58140.5;AT5G58140.6;AT5G58140.7	| phototropin 2 | Chr5:23524771-23529993 FORWARD LENGTH=915 | 201606 [AT5G58140.1,AT5G58140.2,AT5G58140.5,AT5G58140.6,AT5G58140.7]	14	12	13.621	102476	AT5G58140.1;AT5G58140.2;AT5G58140.5;AT5G58140.6;AT5G58140.7	4.15936	0.0120446	0.0297429	0.869863	AT5G58140.1;AT5G58140.2;AT5G58140.5;AT5G58140.6;AT5G58140.7	4.15355	0.0097313	0.0220385	0.901343	AT5G58140.1;AT5G58140.2;AT5G58140.5;AT5G58140.6;AT5G58140.7	3.9292	0.000690708	0.0166359	0.999998	AT5G58140.1;AT5G58140.2;AT5G58140.5;AT5G58140.6;AT5G58140.7	2.3656	0.0100288	0.0340002	0.897222	AT5G58140.1;AT5G58140.2;AT5G58140.5;AT5G58140.6;AT5G58140.7	1.07161	0.746052	0.914751	0.0593646	AT5G58140.1;AT5G58140.2;AT5G58140.5;AT5G58140.6;AT5G58140.7	1.57489	0.279538	0.733215	0.170738	AT5G58140.1;AT5G58140.2;AT5G58140.5;AT5G58140.6;AT5G58140.7	1.01895	0.786891	0.933197	0.0564959	AT5G58140.1;AT5G58140.2;AT5G58140.5;AT5G58140.6;AT5G58140.7	1.0014	0.976423	0.996653	0.0500789	AT5G58140.1;AT5G58140.2;AT5G58140.5;AT5G58140.6;AT5G58140.7	1.05857	0.92146
plastid	AT3G10970.1;AT3G10970.2;AT3G10970.3	| Haloacid dehalogenase-like hydrolase (HAD) superfamily protein | Chr3:3433276-3436077 REVERSE LENGTH=365 | 201606 [AT3G10970.1,AT3G10970.2,AT3G10970.3]	2	1	1.954	41569.1	AT3G10970.1;AT3G10970.2;AT3G10970.3	4.15575	0.0611072	0.105808	0.501284	AT3G10970.1;AT3G10970.2;AT3G10970.3	3.19009	0.0759319	0.1179	0.44626	AT3G10970.1;AT3G10970.2;AT3G10970.3	1.78088	0.99955	0.999557	0.05	AT3G10970.1;AT3G10970.2;AT3G10970.3	0.260866	0.324088	0.444728	0.147901	AT3G10970.1;AT3G10970.2;AT3G10970.3	0.243612	0.218667	0.632119	0.212921	AT3G10970.1;AT3G10970.2;AT3G10970.3	0.309139	0.217225	0.692512	0.21413	AT3G10970.1;AT3G10970.2;AT3G10970.3	0.0819921	0.0410183	0.742917	0.603537	AT3G10970.1;AT3G10970.2;AT3G10970.3	1.30271	0.527229	0.857526	0.0880101	AT3G10970.1;AT3G10970.2;AT3G10970.3	2.33354	0.1122
plastid	AT3G04790.1	| Ribose 5-phosphate isomerase%2C type A protein | Chr3:1313365-1314195 FORWARD LENGTH=276 | 201606	7	7	9.962	29306.6	AT3G04790.1	4.14948	1.17189e-05	0.000338383	1	AT3G04790.1	4.81169	2.78446e-05	0.000383486	1	AT3G04790.1	5.12746	0.000130112	0.00872291	1	AT3G04790.1	3.33257	1.02641e-05	0.000543354	1	AT3G04790.1	1.50899	0.0540571	0.41249	0.532731	AT3G04790.1	1.38477	0.146755	0.63122	0.292033	AT3G04790.1	1.07887	0.367705	0.81327	0.129979	AT3G04790.1	0.862377	0.164197	0.743631	0.267429	AT3G04790.1	0.809267	0.074926
cytosol	AT3G50210.1;AT3G50210.3;AT3G50210.4;AT3G49630.2;AT3G49630.3	| 2-oxoglutarate (2OG) and Fe(II)-dependent oxygenase superfamily protein | Chr3:18614338-18616229 REVERSE LENGTH=332 | 201606 [AT3G50210.1,AT3G50210.3,AT3G50210.4]	7	7	6.919	37222.4	AT3G50210.1;AT3G50210.3;AT3G50210.4;AT3G49630.2;AT3G49630.3	4.1492	0.0835207	0.136876	0.422589	AT3G50210.1;AT3G50210.3;AT3G50210.4;AT3G49630.2;AT3G49630.3	0.916788	0.601073	0.668122	0.0750122	AT3G50210.1;AT3G50210.3;AT3G50210.4;AT3G49630.2;AT3G49630.3	1.66139	0.0656869	0.171749	0.481684	AT3G50210.1;AT3G50210.3;AT3G50210.4;AT3G49630.2;AT3G49630.3	1.50989	0.0520621	0.111778	0.542401	AT3G50210.1;AT3G50210.3;AT3G50210.4;AT3G49630.2;AT3G49630.3	0.951898	0.742532	0.914751	0.0596399	AT3G50210.1;AT3G50210.3;AT3G50210.4;AT3G49630.2;AT3G49630.3	0.990583	0.941273	0.990793	0.0504776	AT3G50210.1;AT3G50210.3;AT3G50210.4;AT3G49630.2;AT3G49630.3	0.911753	0.451516	0.835977	0.104048	AT3G50210.1;AT3G50210.3;AT3G50210.4;AT3G49630.2;AT3G49630.3	4.52581	0.0384713	0.590381	0.599103	AT3G50210.1;AT3G50210.3;AT3G50210.4;AT3G49630.2;AT3G49630.3	2.49743	0.26834
endoplasmic reticulum	AT2G36290.1	| alpha/beta-Hydrolases superfamily protein | Chr2:15208867-15210768 REVERSE LENGTH=364 | 201606	2	2	1.994	40459.5	AT2G36290.1	4.14733	0.00124288	0.00588889	0.999194	AT2G36290.1	3.40539	0.0165513	0.0333785	0.813311	AT2G36290.1	2.97216	0.0205298	0.0870854	0.791242	AT2G36290.1	2.55794	0.00789905	0.0291737	0.926987	AT2G36290.1	1.67189	0.310403	0.698038	0.15436	AT2G36290.1	1.68997	0.265945	0.723798	0.178876	AT2G36290.1	0.939713	0.996289	0.998803	0.0500019	AT2G36290.1	1.21787	0.317739	0.797964	0.151968	AT2G36290.1	1.39539	0.0722221
plastid	AT5G09820.3	| Plastid-lipid associated protein PAP / fibrillin family protein | Chr5:3056464-3057380 REVERSE LENGTH=236 | 201606	2	2	1.891	26584.3	AT5G09820.3	4.13554	0.00281948	0.0102935	0.990395	AT5G09820.3	4.92506	0.000132133	0.0010238	1	AT5G09820.3	4.04959	0.0226214	0.0921907	0.768381	AT5G09820.3	5.08269	0.000190183	0.00265525	1	AT5G09820.3	1.34659	0.999834	0.999958	0.05	AT5G09820.3	2.04291	0.0429607	0.419052	0.591729	AT5G09820.3	1.18586	0.713032	0.909146	0.0621317	AT5G09820.3	0.839693	0.309961	0.796387	0.155687	AT5G09820.3	1.02122	0.850039
plastid	AT1G21640.1;AT1G21640.2	| NAD kinase 2 | Chr1:7588726-7592669 FORWARD LENGTH=985 | 201606 [AT1G21640.1,AT1G21640.2]	3	3	2.928	109190	AT1G21640.1;AT1G21640.2	4.13217	9.3403e-05	0.0011329	1	AT1G21640.1;AT1G21640.2	3.52698	5.39916e-05	0.000573711	1	AT1G21640.1;AT1G21640.2	4.16496	0.00236312	0.0285937	0.99831	AT1G21640.1;AT1G21640.2	2.30053	0.000280601	0.00324658	1	AT1G21640.1;AT1G21640.2	1.55433	0.0299987	0.332142	0.681632	AT1G21640.1;AT1G21640.2	1.31411	0.0240433	0.327984	0.733881	AT1G21640.1;AT1G21640.2	1.39777	0.398261	0.818738	0.119417	AT1G21640.1;AT1G21640.2	1.17159	0.155232	0.74039	0.278688	AT1G21640.1;AT1G21640.2	0.992128	0.943415
plastid	AT5G67370.1	| DUF1230 family protein (DUF1230) | Chr5:26877667-26879465 REVERSE LENGTH=327 | 201606	2	2	1.925	36114.5	AT5G67370.1	4.12743	0.00281941	0.0102935	0.990396	AT5G67370.1	3.59833	0.0043678	0.0119855	0.974283	AT5G67370.1	2.38007	0.0579093	0.160235	0.516186	AT5G67370.1	1.22611	0.492903	0.603672	0.0942334	AT5G67370.1	0.806542	0.408919	0.76338	0.116056	AT5G67370.1	0.909902	0.846259	0.965723	0.0533239	AT5G67370.1	0.688655	0.377247	0.814352	0.126524	AT5G67370.1	1.14704	0.126496	0.72179	0.321367	AT5G67370.1	1.73417	0.0108677
plastid	AT2G37660.1	| NAD(P)-binding Rossmann-fold superfamily protein | Chr2:15795481-15796977 REVERSE LENGTH=325 | 201606	12	11	15.866	34880.4	AT2G37660.1	4.12514	0.000222112	0.00188522	1	AT2G37660.1	4.04107	4.24479e-05	0.000504684	1	AT2G37660.1	3.11278	0.00864452	0.0541389	0.940418	AT2G37660.1	2.25369	0.000643598	0.00549709	0.99995	AT2G37660.1	1.33361	0.0889518	0.473037	0.407137	AT2G37660.1	1.34795	0.0474086	0.435041	0.566474	AT2G37660.1	1.03541	0.71097	0.908095	0.0623185	AT2G37660.1	1.0208	0.933963	0.986783	0.0506203	AT2G37660.1	1.32523	0.184792
plastid	AT3G56290.1	| potassium transporter | Chr3:20878743-20879541 REVERSE LENGTH=173 | 201606	2	1	1.993	19922.8	AT3G56290.1	4.12315	0.00561941	0.0169684	0.958415	AT3G56290.1	2.40132	0.0614872	0.0989168	0.499699	AT3G56290.1	2.6383	0.0218328	0.0902757	0.776858	AT3G56290.1	1.89285	0.0970665	0.178019	0.386027	AT3G56290.1	1.53845	0.23155	0.640786	0.202624	AT3G56290.1	1.17145	0.496492	0.855237	0.0934565	AT3G56290.1	0.817752	0.640567	0.886846	0.0697875	AT3G56290.1	1.71704	0.0904536	0.681383	0.39601	AT3G56290.1	1.56281	0.112741
plastid	AT2G43030.1	| Ribosomal protein L3 family protein | Chr2:17894898-17895713 FORWARD LENGTH=271 | 201606	9	9	9.909	29364.3	AT2G43030.1	4.12248	1.23332e-05	0.000348208	1	AT2G43030.1	4.45977	9.08707e-06	0.000192419	1	AT2G43030.1	5.01182	0.000130449	0.00872291	1	AT2G43030.1	3.26066	0.000121595	0.00206671	1	AT2G43030.1	1.73669	0.0525633	0.407788	0.539936	AT2G43030.1	1.36339	0.0117062	0.227064	0.874378	AT2G43030.1	1.17887	0.0871457	0.742917	0.412149	AT2G43030.1	0.924372	0.0222583	0.525516	0.722965	AT2G43030.1	0.822552	0.0150179
plastid	AT4G17740.1;AT4G17740.2	| Peptidase S41 family protein | Chr4:9867088-9869719 REVERSE LENGTH=515 | 201606 [AT4G17740.1,AT4G17740.2]	5	5	4.963	55764	AT4G17740.1;AT4G17740.2	4.08937	0.00286667	0.0103912	0.989991	AT4G17740.1;AT4G17740.2	3.11954	0.00216372	0.00707139	0.995237	AT4G17740.1;AT4G17740.2	4.99023	0.005519	0.0433501	0.976962	AT4G17740.1;AT4G17740.2	2.81802	0.000959898	0.00711108	0.999701	AT4G17740.1;AT4G17740.2	7.65933	0.174099	0.598401	0.256607	AT4G17740.1;AT4G17740.2	1.70748	0.513525	0.861664	0.0899162	AT4G17740.1;AT4G17740.2	0.899687	0.662315	0.892068	0.0672434	AT4G17740.1;AT4G17740.2	1.31089	0.290205	0.796387	0.165818	AT4G17740.1;AT4G17740.2	0.819474	0.527924
golgi	AT2G25450.1	| 2-oxoglutarate (2OG) and Fe(II)-dependent oxygenase superfamily protein | Chr2:10830286-10831563 REVERSE LENGTH=359 | 201606	10	10	14.923	40351.7	AT2G25450.1	4.0762	2.63443e-06	0.000155676	1	AT2G25450.1	3.2992	1.99662e-05	0.000317088	1	AT2G25450.1	3.53849	0.00107582	0.0214555	0.999962	AT2G25450.1	3.08046	9.28797e-06	0.000531532	1	AT2G25450.1	2.38793	0.000142837	0.0369024	1	AT2G25450.1	1.74145	0.000494921	0.0562353	0.999987	AT2G25450.1	1.14822	0.315172	0.801364	0.152058	AT2G25450.1	1.23551	0.0152135	0.492355	0.798629	AT2G25450.1	1.15196	0.252437
nucleus	AT3G24080.1;AT3G24080.2;AT3G24080.3;AT3G24080.4	| KRR1 family protein | Chr3:8695191-8697107 REVERSE LENGTH=638 | 201606 [AT3G24080.1,AT3G24080.2,AT3G24080.3,AT3G24080.4]	3	3	2.922	74961.8	AT3G24080.1;AT3G24080.2;AT3G24080.3;AT3G24080.4	4.05957	0.00966682	0.0251417	0.902238	AT3G24080.1;AT3G24080.2;AT3G24080.3;AT3G24080.4	2.22489	0.790058	0.832139	0.0562977	AT3G24080.1;AT3G24080.2;AT3G24080.3;AT3G24080.4	0.646361	0.328025	0.476052	0.13972	AT3G24080.1;AT3G24080.2;AT3G24080.3;AT3G24080.4	3.2601	0.0497446	0.108359	0.554111	AT3G24080.1;AT3G24080.2;AT3G24080.3;AT3G24080.4	2.19966	0.467857	0.792019	0.0999759	AT3G24080.1;AT3G24080.2;AT3G24080.3;AT3G24080.4	0.342375	0.0867377	0.521035	0.413299	AT3G24080.1;AT3G24080.2;AT3G24080.3;AT3G24080.4	0.902156	0.870729	0.961605	0.0523376	AT3G24080.1;AT3G24080.2;AT3G24080.3;AT3G24080.4	1.82462	0.300665	0.796387	0.160326	AT3G24080.1;AT3G24080.2;AT3G24080.3;AT3G24080.4	6.28065	0.121894
plastid	AT1G48350.1	| Ribosomal L18p/L5e family protein | Chr1:17867269-17868215 FORWARD LENGTH=170 | 201606	3	3	3.987	18726.5	AT1G48350.1	4.03217	0.000213142	0.00183591	1	AT1G48350.1	3.92906	5.33497e-05	0.000570785	1	AT1G48350.1	3.64454	0.00163634	0.0243643	0.99965	AT1G48350.1	2.48653	0.000656077	0.00559427	0.999945	AT1G48350.1	1.55705	0.0815938	0.4627	0.428357	AT1G48350.1	1.55459	0.00470431	0.144893	0.970191	AT1G48350.1	0.972055	0.852203	0.956259	0.0530677	AT1G48350.1	1.02624	0.889686	0.974874	0.0517411	AT1G48350.1	1.10636	0.539447
nucleus	AT4G11860.1	| FAM63A-like protein (DUF544) | Chr4:7134237-7138361 REVERSE LENGTH=682 | 201606	7	7	6.936	74428.8	AT4G11860.1	4.03041	0.013385	0.0323147	0.852335	AT4G11860.1	1.99914	0.161099	0.221093	0.272424	AT4G11860.1	4.74328	0.0113159	0.0632634	0.905456	AT4G11860.1	1.71363	0.040125	0.092773	0.60914	AT4G11860.1	1.23636	0.146472	0.564345	0.292445	AT4G11860.1	1.21867	0.271681	0.727249	0.175366	AT4G11860.1	1.08372	0.479382	0.841817	0.0972618	AT4G11860.1	2.01607	0.115184	0.711985	0.34168	AT4G11860.1	0.849709	0.689548
plastid	AT1G54780.1	| thylakoid lumen 18.3 kDa protein | Chr1:20439533-20440953 FORWARD LENGTH=285 | 201606	10	10	11.955	31139.8	AT1G54780.1	4.01668	0.000489813	0.00314297	0.999988	AT1G54780.1	3.35514	0.000309354	0.00177442	0.999999	AT1G54780.1	3.05615	0.00741877	0.0500639	0.955706	AT1G54780.1	2.16647	0.000348308	0.0037157	0.999998	AT1G54780.1	1.09032	0.555265	0.833627	0.0821769	AT1G54780.1	1.13649	0.267033	0.724535	0.178202	AT1G54780.1	0.950245	0.674507	0.894036	0.0659132	AT1G54780.1	1.19717	0.327794	0.802686	0.147368	AT1G54780.1	1.31429	0.25619
plastid	AT1G31190.1	| myo-inositol monophosphatase like 1 | Chr1:11144861-11146800 FORWARD LENGTH=371 | 201606	5	5	5.982	40445.6	AT1G31190.1	4.00854	0.000102089	0.00119461	1	AT1G31190.1	4.83682	0.000421696	0.00219576	0.999995	AT1G31190.1	4.06702	0.0214268	0.0889634	0.781289	AT1G31190.1	2.74851	0.000224393	0.00286524	1	AT1G31190.1	0.909209	0.488507	0.801612	0.0952001	AT1G31190.1	1.95537	0.224914	0.701101	0.20782	AT1G31190.1	1.51372	0.0450994	0.742917	0.57929	AT1G31190.1	0.828755	0.340675	0.802862	0.14179	AT1G31190.1	0.985622	0.765693
mitochondrion	AT5G26780.1;AT5G26780.4	| serine hydroxymethyltransferase 2 | Chr5:9418299-9421725 FORWARD LENGTH=517 | 201606 [AT5G26780.1,AT5G26780.4]	23	10	26.796	57343.5	AT5G26780.1;AT5G26780.4	3.99617	3.52629e-05	0.00064855	1	AT5G26780.1;AT5G26780.4	3.60196	2.36753e-05	0.00034774	1	AT5G26780.1;AT5G26780.4	2.79386	0.00250018	0.0293322	0.997906	AT5G26780.1;AT5G26780.4	1.57212	0.00310307	0.0154303	0.987871	AT5G26780.1;AT5G26780.4	0.916851	0.543688	0.829639	0.0841989	AT5G26780.1;AT5G26780.4	1.04151	0.692329	0.927762	0.0640863	AT5G26780.1;AT5G26780.4	0.93501	0.562275	0.865169	0.080996	AT5G26780.1;AT5G26780.4	1.10944	0.0902574	0.681383	0.396509	AT5G26780.1;AT5G26780.4	1.43034	0.0207395
nucleus	AT4G21660.1;AT4G21660.2;AT4G21660.3	| proline-rich spliceosome-associated (PSP) family protein | Chr4:11506259-11509772 REVERSE LENGTH=584 | 201606 [AT4G21660.1,AT4G21660.2,AT4G21660.3]	3	3	2.958	66834.3	AT4G21660.1;AT4G21660.2;AT4G21660.3	3.99201	0.0151119	0.0354446	0.83063	AT4G21660.1;AT4G21660.2;AT4G21660.3	3.8648	0.00562002	0.0144591	0.958406	AT4G21660.1;AT4G21660.2;AT4G21660.3	2.64736	0.0388903	0.127182	0.626627	AT4G21660.1;AT4G21660.2;AT4G21660.3	3.82215	0.0234202	0.0630076	0.739858	AT4G21660.1;AT4G21660.2;AT4G21660.3	1.41249	0.747523	0.914751	0.0592509	AT4G21660.1;AT4G21660.2;AT4G21660.3	1.51219	0.531313	0.873287	0.0864633	AT4G21660.1;AT4G21660.2;AT4G21660.3	6.19563	0.426588	0.82935	0.110813	AT4G21660.1;AT4G21660.2;AT4G21660.3	1.03291	0.906919	0.980218	0.0512364	AT4G21660.1;AT4G21660.2;AT4G21660.3	1.50792	0.265648
plastid	AT3G29185.1	| glutamate NMDA receptor subunit epsilon-1%2C putative (DUF3598) | Chr3:11155092-11157207 REVERSE LENGTH=396 | 201606	9	8	9.906	44677.3	AT3G29185.1	3.94881	0.000183759	0.0016951	1	AT3G29185.1	4.33926	0.000515168	0.00251981	0.999984	AT3G29185.1	2.37265	0.0541787	0.154153	0.534592	AT3G29185.1	3.02681	0.000138446	0.00219869	1	AT3G29185.1	1.57413	0.0146421	0.255983	0.836434	AT3G29185.1	1.49636	0.0366625	0.390414	0.631971	AT3G29185.1	1.13718	0.734337	0.916029	0.0602987	AT3G29185.1	0.910017	0.649289	0.900639	0.0691843	AT3G29185.1	1.6643	0.075885
plastid	AT2G22450.1	| riboflavin biosynthesis protein | Chr2:9530654-9532691 FORWARD LENGTH=476 | 201606	3	3	2.99	52200.8	AT2G22450.1	3.94025	0.00372894	0.0125525	0.981559	AT2G22450.1	4.75494	0.000196242	0.00131676	1	AT2G22450.1	3.34819	0.00352166	0.0347516	0.993262	AT2G22450.1	2.24512	0.00853024	0.0306582	0.918124	AT2G22450.1	1.29492	0.515794	0.816593	0.0894623	AT2G22450.1	1.4394	0.142329	0.62679	0.298611	AT2G22450.1	1.74301	0.0514671	0.742917	0.545357	AT2G22450.1	0.828665	0.305166	0.796387	0.158053	AT2G22450.1	1.17683	0.6239
plasma membrane	AT2G36800.1	| don-glucosyltransferase 1 | Chr2:15423493-15424980 REVERSE LENGTH=495 | 201606	3	2	2.991	55799.3	AT2G36800.1	3.93991	0.00442513	0.0141259	0.973597	AT2G36800.1	3.07165	0.00195274	0.00656771	0.996456	AT2G36800.1	3.96564	0.00455566	0.0391079	0.985844	AT2G36800.1	2.77366	0.000687508	0.00573714	0.999931	AT2G36800.1	2.01086	0.0115445	0.2282	0.876546	AT2G36800.1	1.79625	0.00779988	0.184324	0.928379	AT2G36800.1	1.05256	0.663221	0.892068	0.0671423	AT2G36800.1	1.28267	0.412436	0.817075	0.116056	AT2G36800.1	0.993511	0.886662
plastid	AT5G20130.1;AT5G20130.2	| sulfate adenylyltransferase subunit | Chr5:6797485-6798700 FORWARD LENGTH=202 | 201606 [AT5G20130.1,AT5G20130.2]	2	2	1.993	21948.5	AT5G20130.1;AT5G20130.2	3.93955	0.000953687	0.00491546	0.999709	AT5G20130.1;AT5G20130.2	3.28018	0.00179003	0.00615491	0.997273	AT5G20130.1;AT5G20130.2	1.34025	0.720892	0.809451	0.0604787	AT5G20130.1;AT5G20130.2	1.73972	0.00248445	0.0134749	0.993056	AT5G20130.1;AT5G20130.2	1.48545	0.0170344	0.267159	0.807657	AT5G20130.1;AT5G20130.2	1.15062	0.176469	0.658507	0.253898	AT5G20130.1;AT5G20130.2	0.900193	0.362839	0.81327	0.131801	AT5G20130.1;AT5G20130.2	1.20101	0.438833	0.828323	0.108419	AT5G20130.1;AT5G20130.2	2.93941	0.0220698
extracellular	AT3G32980.1	| Peroxidase superfamily protein | Chr3:13526404-13529949 REVERSE LENGTH=352 | 201606	8	5	10.918	38847.8	AT3G32980.1	3.93511	0.000725858	0.00407473	0.999911	AT3G32980.1	3.48136	9.41596e-05	0.000832207	1	AT3G32980.1	3.1616	0.00696765	0.0487736	0.961085	AT3G32980.1	1.93449	0.00193831	0.0113878	0.996533	AT3G32980.1	1.40454	0.0262669	0.310254	0.71338	AT3G32980.1	1.14527	0.19968	0.674443	0.229823	AT3G32980.1	1.22488	0.136464	0.751498	0.307758	AT3G32980.1	1.13034	0.508989	0.849575	0.0916632	AT3G32980.1	1.24466	0.359659
golgi	AT1G05010.1	| ethylene-forming enzyme | Chr1:1431419-1432695 REVERSE LENGTH=323 | 201606	10	8	12.879	36678	AT1G05010.1	3.93278	0.000237227	0.00195264	1	AT1G05010.1	3.80466	8.67455e-06	0.000186797	1	AT1G05010.1	3.52882	0.00350129	0.0347516	0.993382	AT1G05010.1	2.4855	4.74845e-05	0.00122697	1	AT1G05010.1	1.022	0.794341	0.933039	0.0560349	AT1G05010.1	0.894084	0.289628	0.736313	0.165083	AT1G05010.1	0.965358	0.691333	0.898921	0.0641848	AT1G05010.1	1.03367	0.902901	0.978415	0.0513462	AT1G05010.1	1.11447	0.585271
plastid	AT5G47840.1;AT5G47840.2	| adenosine monophosphate kinase | Chr5:19375488-19378058 FORWARD LENGTH=283 | 201606 [AT5G47840.1,AT5G47840.2]	5	4	4.926	31452.7	AT5G47840.1;AT5G47840.2	3.92374	0.00888433	0.0237758	0.913159	AT5G47840.1;AT5G47840.2	4.02689	0.00665765	0.0163867	0.944315	AT5G47840.1;AT5G47840.2	3.414	0.033394	0.116932	0.668245	AT5G47840.1;AT5G47840.2	2.45682	0.0283966	0.0721558	0.694877	AT5G47840.1;AT5G47840.2	1.62775	0.160031	0.586355	0.273802	AT5G47840.1;AT5G47840.2	1.42007	0.229518	0.705205	0.204192	AT5G47840.1;AT5G47840.2	1.13971	0.488379	0.842546	0.0952286	AT5G47840.1;AT5G47840.2	0.974384	0.766155	0.939658	0.0580791	AT5G47840.1;AT5G47840.2	1.14931	0.445907
mitochondrion,plastid	AT5G08740.1	| NAD(P)H dehydrogenase C1 | Chr5:2848752-2851323 REVERSE LENGTH=519 | 201606	8	7	7.914	57020.4	AT5G08740.1	3.92301	0.000613279	0.00361223	0.99996	AT5G08740.1	3.56243	0.000823428	0.00348895	0.999843	AT5G08740.1	3.19802	0.00563586	0.0439286	0.975779	AT5G08740.1	1.8448	0.014779	0.0448131	0.834735	AT5G08740.1	1.17636	0.872639	0.958036	0.0522682	AT5G08740.1	0.936065	0.828477	0.964873	0.0541558	AT5G08740.1	0.936046	0.80642	0.940317	0.0553267	AT5G08740.1	1.10122	0.409525	0.815817	0.116951	AT5G08740.1	1.2267	0.173175
nucleus	AT1G14170.1;AT1G14170.2	| RNA-binding KH domain-containing protein | Chr1:4843463-4845253 REVERSE LENGTH=454 | 201606	2	1	1.918	49769.9	AT1G14170.1;AT1G14170.2	3.92069	0.799483	0.847689	0.0557275	AT1G14170.1;AT1G14170.2	0.810735	0.610071	0.676644	0.0737492	AT1G14170.1;AT1G14170.2	2.58779	0.427927	0.56649	0.105966	AT1G14170.1;AT1G14170.2	1.18205	0.752867	0.822823	0.0588447	AT1G14170.1;AT1G14170.2	1.24621	0.546384	0.829639	0.0837198	AT1G14170.1;AT1G14170.2	0.554219	0.209638	0.685407	0.220683	AT1G14170.1;AT1G14170.2	1.0354	0.49973	0.845133	0.0927651	AT1G14170.1;AT1G14170.2	4.83598	0.564259	0.876126	0.0813375	AT1G14170.1;AT1G14170.2	1.51508	0.325467
plastid	AT2G43560.1;AT2G43560.2	| FKBP-like peptidyl-prolyl cis-trans isomerase family protein | Chr2:18073995-18075385 REVERSE LENGTH=223 | 201606 [AT2G43560.1,AT2G43560.2]	5	4	4.983	23564.9	AT2G43560.1;AT2G43560.2	3.9124	1.39054e-05	0.00038406	1	AT2G43560.1;AT2G43560.2	3.76111	4.55212e-06	0.000126415	1	AT2G43560.1;AT2G43560.2	3.52556	0.00976343	0.0585115	0.925921	AT2G43560.1;AT2G43560.2	2.63804	1.08255e-05	0.00055571	1	AT2G43560.1;AT2G43560.2	1.42071	0.0148116	0.255983	0.834331	AT2G43560.1;AT2G43560.2	1.22852	0.0429032	0.419052	0.592071	AT2G43560.1;AT2G43560.2	1.00561	0.939009	0.982868	0.0505152	AT2G43560.1;AT2G43560.2	1.04023	0.580027	0.879999	0.0787716	AT2G43560.1;AT2G43560.2	1.10973	0.502926
cytosol	AT2G47710.1	| Adenine nucleotide alpha hydrolases-like superfamily protein | Chr2:19555045-19555956 REVERSE LENGTH=162 | 201606	2	2	2.982	17300.2	AT2G47710.1	3.90896	0.0269743	0.0554769	0.707116	AT2G47710.1	3.7077	0.0317998	0.0567685	0.667384	AT2G47710.1	4.38044	0.0542054	0.154153	0.534456	AT2G47710.1	3.43871	0.0336421	0.0816863	0.653468	AT2G47710.1	2.69456	0.0615901	0.428428	0.499272	AT2G47710.1	1.44647	0.540044	0.879005	0.0848543	AT2G47710.1	1.87399	0.182488	0.763824	0.247243	AT2G47710.1	1.05428	0.596767	0.88624	0.0762126	AT2G47710.1	0.892368	0.446313
plastid	AT3G14930.3	| Uroporphyrinogen decarboxylase | Chr3:5021290-5022577 FORWARD LENGTH=341 | 201606	8	7	8.766	38268	AT3G14930.3	3.90696	2.62142e-05	0.000553231	1	AT3G14930.3	4.26453	3.62409e-06	0.000109629	1	AT3G14930.3	4.59465	9.20032e-05	0.00710322	1	AT3G14930.3	3.57365	8.7169e-06	0.000527131	1	AT3G14930.3	1.49542	0.158206	0.585521	0.276184	AT3G14930.3	1.6228	0.00303898	0.121667	0.988461	AT3G14930.3	1.11131	0.319568	0.802443	0.149985	AT3G14930.3	0.916152	0.186555	0.755461	0.242604	AT3G14930.3	0.850328	0.116352
plastid	AT4G19710.2	| aspartate kinase-homoserine dehydrogenase ii | Chr4:10725229-10729536 FORWARD LENGTH=916 | 201606	10	7	9.673	100253	AT4G19710.2	3.90501	0.0039242	0.0129921	0.979413	AT4G19710.2	3.10083	0.00472428	0.0126896	0.969943	AT4G19710.2	2.59413	0.0429173	0.134883	0.599355	AT4G19710.2	1.46708	0.108518	0.194872	0.359637	AT4G19710.2	1.136	0.658788	0.879255	0.0676409	AT4G19710.2	1.64528	0.202839	0.675775	0.226853	AT4G19710.2	1.26971	0.367281	0.81327	0.130137	AT4G19710.2	1.25934	0.243357	0.780988	0.194624	AT4G19710.2	1.50533	0.136909
cytosol	AT1G74090.1	| desulfo-glucosinolate sulfotransferase 18 | Chr1:27863003-27864055 FORWARD LENGTH=350 | 201606	3	2	3.971	40466.4	AT1G74090.1	3.90238	0.25573	0.341108	0.185424	AT1G74090.1	1.15618	0.806175	0.844216	0.0553406	AT1G74090.1	0.603682	0.0325407	0.115162	0.675218	AT1G74090.1	0.573203	0.00875252	0.0311487	0.915006	AT1G74090.1	0.129484	0.186553	0.606567	0.24292	AT1G74090.1	0.671874	0.255119	0.719113	0.185828	AT1G74090.1	0.692845	0.340791	0.806284	0.140592	AT1G74090.1	3.37524	0.233431	0.7799	0.201793	AT1G74090.1	6.4643	0.110952
plastid	AT3G46630.1	| DCL protein (DUF3223) | Chr3:17181138-17182346 REVERSE LENGTH=207 | 201606	4	3	3.885	24192.6	AT3G46630.1	3.89693	0.0018495	0.00770635	0.996987	AT3G46630.1	3.5237	0.00134793	0.00496031	0.998924	AT3G46630.1	1.66273	0.697514	0.791066	0.0624503	AT3G46630.1	2.0934	0.0149737	0.0453765	0.832329	AT3G46630.1	1.36822	0.305284	0.693642	0.156895	AT3G46630.1	0.830109	0.417346	0.809708	0.113506	AT3G46630.1	0.922662	0.682832	0.898331	0.0650427	AT3G46630.1	1.10592	0.690167	0.913928	0.0646495	AT3G46630.1	2.3437	0.0976702
cytosol	AT1G52100.1;AT1G52100.2;AT1G52100.5	| Mannose-binding lectin superfamily protein | Chr1:19383291-19385123 REVERSE LENGTH=437 | 201606	15	13	15.821	47658.8	AT1G52100.1;AT1G52100.2;AT1G52100.5	3.89445	2.85775e-06	0.000163181	1	AT1G52100.1;AT1G52100.2;AT1G52100.5	4.25437	1.12632e-05	0.000217642	1	AT1G52100.1;AT1G52100.2;AT1G52100.5	3.29947	0.000989832	0.0207009	0.999977	AT1G52100.1;AT1G52100.2;AT1G52100.5	2.61128	2.20042e-06	0.000259079	1	AT1G52100.1;AT1G52100.2;AT1G52100.5	1.32443	0.197713	0.616494	0.231707	AT1G52100.1;AT1G52100.2;AT1G52100.5	1.28059	0.00521364	0.152423	0.963736	AT1G52100.1;AT1G52100.2;AT1G52100.5	1.08106	0.211354	0.769699	0.21917	AT1G52100.1;AT1G52100.2;AT1G52100.5	0.915401	0.31524	0.796387	0.153148	AT1G52100.1;AT1G52100.2;AT1G52100.5	1.18033	0.197599
plastid	AT5G14200.1	| isopropylmalate dehydrogenase 1 | Chr5:4576220-4578111 FORWARD LENGTH=409 | 201606	9	4	8.885	44163.6	AT5G14200.1	3.87235	0.000153427	0.00151696	1	AT5G14200.1	1.42081	0.0286882	0.0519949	0.692424	AT5G14200.1	1.23136	0.414416	0.554519	0.109677	AT5G14200.1	1.28912	0.158532	0.26031	0.275755	AT5G14200.1	0.936542	0.680933	0.88598	0.0652386	AT5G14200.1	1.07396	0.606405	0.898208	0.0742584	AT5G14200.1	0.878178	0.400239	0.819023	0.118782	AT5G14200.1	2.72545	3.41834e-05	0.0434214	1	AT5G14200.1	3.14478	0.00100697
plastid	AT3G02660.1;AT3G02660.2	| Tyrosyl-tRNA synthetase%2C class Ib%2C bacterial/mitochondrial | Chr3:570221-571756 REVERSE LENGTH=511 | 201606 [AT3G02660.1,AT3G02660.2]	8	7	8.923	56621	AT3G02660.1;AT3G02660.2	3.86111	0.000214947	0.00183899	1	AT3G02660.1;AT3G02660.2	3.40478	0.000461822	0.00233546	0.999991	AT3G02660.1;AT3G02660.2	1.65731	0.00857468	0.0541323	0.94131	AT3G02660.1;AT3G02660.2	1.61117	0.00492605	0.0208735	0.967416	AT3G02660.1;AT3G02660.2	1.13298	0.605571	0.8552	0.0743753	AT3G02660.1;AT3G02660.2	1.53084	0.0276273	0.349259	0.701438	AT3G02660.1;AT3G02660.2	1.16888	0.301245	0.791995	0.158943	AT3G02660.1;AT3G02660.2	1.13403	0.402269	0.814421	0.11923	AT3G02660.1;AT3G02660.2	2.32974	0.00084714
plastid	AT5G24300.1;AT5G24300.2	| Glycogen/starch synthases%2C ADP-glucose type | Chr5:8266934-8270860 FORWARD LENGTH=652 | 201606 [AT5G24300.1,AT5G24300.2]	9	8	9.738	72099.4	AT5G24300.1;AT5G24300.2	3.85287	0.000531142	0.00334415	0.999981	AT5G24300.1;AT5G24300.2	3.4863	0.000376644	0.00202551	0.999997	AT5G24300.1;AT5G24300.2	2.74007	0.00380693	0.0358407	0.991468	AT5G24300.1;AT5G24300.2	1.78801	0.0276045	0.0707984	0.701636	AT5G24300.1;AT5G24300.2	1.16933	0.685163	0.888892	0.0648044	AT5G24300.1;AT5G24300.2	1.07521	0.724574	0.93673	0.0611168	AT5G24300.1;AT5G24300.2	1.0193	0.937239	0.982471	0.0505457	AT5G24300.1;AT5G24300.2	1.10515	0.427567	0.823526	0.111577	AT5G24300.1;AT5G24300.2	1.40612	0.0398162
plastid	AT3G52380.1	| chloroplast RNA-binding protein 33 | Chr3:19421619-19422855 FORWARD LENGTH=329 | 201606	10	10	9.963	35743.5	AT3G52380.1	3.84179	1.4386e-05	0.000384789	1	AT3G52380.1	3.45403	4.63728e-07	3.54333e-05	1	AT3G52380.1	3.14718	0.000464516	0.0140516	1	AT3G52380.1	2.20666	1.76045e-05	0.000688201	1	AT3G52380.1	1.2381	0.0407915	0.37635	0.604949	AT3G52380.1	1.17544	0.10933	0.567531	0.357899	AT3G52380.1	0.99381	0.887268	0.963907	0.0517723	AT3G52380.1	1.11226	0.189367	0.756707	0.239768	AT3G52380.1	1.22071	0.137117
plastid	AT5G42070.1	| hypothetical protein | Chr5:16819118-16820119 REVERSE LENGTH=164 | 201606	3	2	2.924	17681.9	AT5G42070.1	3.82999	0.10464	0.163128	0.368172	AT5G42070.1	3.19398	0.04255	0.0724662	0.594184	AT5G42070.1	2.76835	0.126851	0.258379	0.315427	AT5G42070.1	2.27266	0.566074	0.668709	0.0803696	AT5G42070.1	1.75515	0.697544	0.894955	0.0635773	AT5G42070.1	1.70072	0.363357	0.778712	0.131605	AT5G42070.1	1.24774	0.987894	0.997439	0.0500202	AT5G42070.1	1.19913	0.964637	0.996523	0.0501775	AT5G42070.1	1.3835	0.78999
vacuole	AT2G20230.1	| Tetraspanin family protein | Chr2:8725762-8727388 FORWARD LENGTH=270 | 201606	3	3	2.991	29722.6	AT2G20230.1	3.79783	0.00045606	0.00298389	0.999992	AT2G20230.1	3.43072	0.000238459	0.00148876	1	AT2G20230.1	2.13129	0.0151667	0.0741814	0.855379	AT2G20230.1	1.63342	0.00948698	0.0329318	0.90474	AT2G20230.1	0.94099	0.700845	0.895271	0.0632609	AT2G20230.1	0.7	0.154586	0.639189	0.281022	AT2G20230.1	1.14252	0.485905	0.842546	0.0957804	AT2G20230.1	1.10701	0.487578	0.844434	0.0962944	AT2G20230.1	1.78194	0.0177998
plastid	AT1G08550.1;AT1G08550.2;AT1G08550.3	| non-photochemical quenching 1 | Chr1:2707462-2709387 FORWARD LENGTH=462 | 201606 [AT1G08550.1,AT1G08550.2,AT1G08550.3]	8	8	7.945	52018.4	AT1G08550.1;AT1G08550.2;AT1G08550.3	3.79739	0.013141	0.0318772	0.855482	AT1G08550.1;AT1G08550.2;AT1G08550.3	3.53797	0.0139354	0.029096	0.845307	AT1G08550.1;AT1G08550.2;AT1G08550.3	2.62742	0.163012	0.299938	0.260848	AT1G08550.1;AT1G08550.2;AT1G08550.3	1.65238	0.198155	0.307182	0.231281	AT1G08550.1;AT1G08550.2;AT1G08550.3	0.914094	0.910529	0.973608	0.0511123	AT1G08550.1;AT1G08550.2;AT1G08550.3	0.495684	0.291905	0.738407	0.16385	AT1G08550.1;AT1G08550.2;AT1G08550.3	0.416196	0.18218	0.763824	0.247576	AT1G08550.1;AT1G08550.2;AT1G08550.3	1.07333	0.527241	0.857526	0.0880079	AT1G08550.1;AT1G08550.2;AT1G08550.3	1.44529	0.21654
plastid	AT5G24650.1	| Mitochondrial import inner membrane translocase subunit Tim17/Tim22/Tim23 family protein | Chr5:8437123-8438859 FORWARD LENGTH=259 | 201606	3	3	4.93	27773.1	AT5G24650.1	3.79498	0.00154307	0.00683089	0.998298	AT5G24650.1	4.04548	0.000319109	0.00181742	0.999999	AT5G24650.1	3.83025	0.0213178	0.0887558	0.782486	AT5G24650.1	2.05213	0.000868681	0.00678131	0.999803	AT5G24650.1	1.2513	0.358077	0.73141	0.133623	AT5G24650.1	1.17488	0.822005	0.964873	0.0544832	AT5G24650.1	1.44049	0.113783	0.743909	0.348639	AT5G24650.1	0.938079	0.684048	0.910834	0.0652806	AT5G24650.1	0.990791	0.861884
plastid	AT2G40100.1	| light harvesting complex photosystem II | Chr2:16745884-16747190 FORWARD LENGTH=276 | 201606	2	2	1.994	30213	AT2G40100.1	3.78239	0.0311438	0.061777	0.672498	AT2G40100.1	9.69936	0.0259975	0.0480085	0.715797	AT2G40100.1	4.17978	0.0538499	0.153337	0.536279	AT2G40100.1	2.56817	0.0703041	0.139039	0.465626	AT2G40100.1	1.02625	0.658204	0.879255	0.0677073	AT2G40100.1	1.10302	0.685228	0.926202	0.0647977	AT2G40100.1	1.30301	0.431312	0.832847	0.109476	AT2G40100.1	0.389963	0.187479	0.756616	0.241666	AT2G40100.1	0.904925	0.37051
cytosol	AT5G05860.1	| UDP-glucosyl transferase 76C2 | Chr5:1765545-1767348 FORWARD LENGTH=450 | 201606	3	3	2.989	50426.4	AT5G05860.1	3.78208	0.0155438	0.0361858	0.825359	AT5G05860.1	2.66205	0.0200131	0.0388935	0.774476	AT5G05860.1	2.85993	0.0152816	0.0743658	0.853927	AT5G05860.1	2.44503	0.00628047	0.0248784	0.9495	AT5G05860.1	1.43276	0.2991	0.692179	0.160048	AT5G05860.1	1.24365	0.940791	0.990793	0.0504855	AT5G05860.1	1.24955	0.400208	0.819023	0.118792	AT5G05860.1	1.42074	0.359836	0.803914	0.134092	AT5G05860.1	1.32244	0.54053
	AT1G76890.2	| Duplicated homeodomain-like superfamily protein | Chr1:28873211-28875203 REVERSE LENGTH=575 | 201606	2	2	1.919	65838.7	AT1G76890.2	3.77751	0.0344597	0.0666885	0.647493	AT1G76890.2	3.33415	0.0373217	0.0648219	0.627482	AT1G76890.2	2.61552	0.119997	0.248836	0.328253	AT1G76890.2	2.13193	0.201188	0.31093	0.228398	AT1G76890.2	2.5598	0.0654033	0.433916	0.483949	AT1G76890.2	2.01571	0.294247	0.74138	0.162596	AT1G76890.2	3.82379	0.0322996	0.736083	0.663546	AT1G76890.2	1.13297	0.58378	0.880812	0.0781834	AT1G76890.2	1.44427	0.179763
plasma membrane	AT3G47960.1	| Major facilitator superfamily protein | Chr3:17698126-17700771 REVERSE LENGTH=636 | 201606	3	3	2.987	71042.3	AT3G47960.1	3.77262	0.00622711	0.0182189	0.950228	AT3G47960.1	3.70097	0.00343756	0.00993725	0.984613	AT3G47960.1	2.89029	0.0291152	0.107475	0.704756	AT3G47960.1	2.23368	0.0261368	0.0682368	0.714546	AT3G47960.1	1.25353	0.640544	0.871552	0.0697901	AT3G47960.1	1.32339	0.875229	0.97642	0.0521758	AT3G47960.1	1.4894	0.154596	0.763824	0.281009	AT3G47960.1	1.01936	0.975751	0.996653	0.0500834	AT3G47960.1	1.30527	0.234919
mitochondrion	AT2G35370.1	| glycine decarboxylase complex H | Chr2:14891239-14892050 FORWARD LENGTH=165 | 201606	10	5	16.871	17947.3	AT2G35370.1	3.7684	4.84595e-05	0.000769598	1	AT2G35370.1	3.34181	3.54413e-05	0.000450093	1	AT2G35370.1	2.63663	0.0934495	0.212014	0.389028	AT2G35370.1	2.10218	1.6731e-05	0.000664272	1	AT2G35370.1	1.21147	0.0254636	0.30811	0.720641	AT2G35370.1	1.1799	0.0336235	0.372276	0.653605	AT2G35370.1	0.921701	0.283963	0.789232	0.16822	AT2G35370.1	1.12765	0.328835	0.802699	0.146904	AT2G35370.1	1.42925	0.215051
plastid	AT5G19220.1	| ADP glucose pyrophosphorylase large subunit 1 | Chr5:6463931-6466775 REVERSE LENGTH=522 | 201606	18	18	22.716	57676.7	AT5G19220.1	3.76402	0.00303418	0.0108589	0.988505	AT5G19220.1	4.00386	1.3948e-05	0.000248714	1	AT5G19220.1	3.57725	0.000432515	0.0136524	1	AT5G19220.1	2.13848	0.000882153	0.00680738	0.999789	AT5G19220.1	1.2649	0.0691779	0.446144	0.469709	AT5G19220.1	1.28875	0.0631026	0.479353	0.493075	AT5G19220.1	1.16066	0.412494	0.822372	0.114963	AT5G19220.1	0.940097	0.576387	0.879859	0.0793503	AT5G19220.1	1.05221	0.985098
plastid	AT1G04420.1	| NAD(P)-linked oxidoreductase superfamily protein | Chr1:1191634-1193699 FORWARD LENGTH=412 | 201606	6	6	5.982	46428.2	AT1G04420.1	3.74935	0.00337955	0.0116915	0.985198	AT1G04420.1	3.60719	0.00416152	0.0115631	0.976709	AT1G04420.1	2.65534	0.0496545	0.146626	0.558804	AT1G04420.1	2.48423	0.0151182	0.0457052	0.830553	AT1G04420.1	1.30895	0.518074	0.818419	0.0890101	AT1G04420.1	1.19666	0.385639	0.793152	0.123606	AT1G04420.1	0.902548	0.972723	0.99115	0.0501028	AT1G04420.1	1.03941	0.489269	0.845283	0.0959144	AT1G04420.1	1.412	0.0652337
plastid	AT2G47910.1;AT2G47910.2	| chlororespiratory reduction 6 | Chr2:19614741-19615559 FORWARD LENGTH=246 | 201606 [AT2G47910.1,AT2G47910.2]	4	4	3.952	28029	AT2G47910.1;AT2G47910.2	3.74028	0.000137597	0.00142417	1	AT2G47910.1;AT2G47910.2	3.88421	0.000118213	0.000959676	1	AT2G47910.1;AT2G47910.2	3.45439	0.00550867	0.0433501	0.977065	AT2G47910.1;AT2G47910.2	2.92484	0.000553177	0.00503808	0.999976	AT2G47910.1;AT2G47910.2	1.4071	0.208026	0.625541	0.222119	AT2G47910.1;AT2G47910.2	1.53113	0.0686527	0.48814	0.471639	AT2G47910.1;AT2G47910.2	1.26046	0.412415	0.822372	0.114987	AT2G47910.1;AT2G47910.2	0.962944	0.0712022	0.656153	0.451919	AT2G47910.1;AT2G47910.2	1.08276	0.487276
golgi	AT4G02030.1;AT4G02030.2	| Vps51/Vps67 family (components of vesicular transport) protein | Chr4:892262-897175 FORWARD LENGTH=780 | 201606 [AT4G02030.1,AT4G02030.2]	2	2	1.992	88519.3	AT4G02030.1;AT4G02030.2	3.73179	0.249991	0.334722	0.189279	AT4G02030.1;AT4G02030.2	1.76169	0.633107	0.696871	0.0707126	AT4G02030.1;AT4G02030.2	0.334819	0.0528302	0.151771	0.54158	AT4G02030.1;AT4G02030.2	0.405714	0.00561294	0.0228932	0.9585	AT4G02030.1;AT4G02030.2	0.63235	0.0746919	0.45733	0.450385	AT4G02030.1;AT4G02030.2	0.994206	0.966492	0.992834	0.0501552	AT4G02030.1;AT4G02030.2	1.10019	0.490108	0.842546	0.0948461	AT4G02030.1;AT4G02030.2	2.1183	0.433991	0.824494	0.109758	AT4G02030.1;AT4G02030.2	11.1457	0.0385452
plastid	AT1G51110.1	| Plastid-lipid associated protein PAP / fibrillin family protein | Chr1:18935380-18937484 FORWARD LENGTH=409 | 201606	7	7	7.941	45767.5	AT1G51110.1	3.73106	0.0084963	0.0230038	0.9186	AT1G51110.1	2.93269	0.00799922	0.0189697	0.92558	AT1G51110.1	1.53478	0.190841	0.331348	0.229486	AT1G51110.1	0.665275	0.337318	0.457867	0.142063	AT1G51110.1	0.600902	0.26414	0.665523	0.180005	AT1G51110.1	0.699563	0.427958	0.81381	0.110423	AT1G51110.1	0.622539	0.255202	0.787972	0.185772	AT1G51110.1	1.27223	0.252318	0.781634	0.188507	AT1G51110.1	2.431	0.00803897
plastid	AT4G24280.1	| chloroplast heat shock protein 70-1 | Chr4:12590094-12593437 FORWARD LENGTH=718 | 201606	41	15	51.627	76508.6	AT4G24280.1	3.7237	4.1954e-05	0.000715269	1	AT4G24280.1	3.50641	2.1766e-05	0.000330194	1	AT4G24280.1	3.51289	0.00136249	0.0228521	0.999859	AT4G24280.1	2.50313	1.11152e-05	0.000563315	1	AT4G24280.1	1.47873	0.0306778	0.33456	0.676182	AT4G24280.1	1.47327	0.0174197	0.274077	0.803202	AT4G24280.1	1.09455	0.428782	0.831072	0.110189	AT4G24280.1	1.06197	0.563993	0.876126	0.0813822	AT4G24280.1	1.06001	0.650214
plastid	AT2G47450.1	| chloroplast signal recognition particle component (CAO) | Chr2:19472781-19473902 FORWARD LENGTH=373 | 201606	9	8	10.966	41279	AT2G47450.1	3.7232	6.72999e-05	0.000940318	1	AT2G47450.1	3.31793	8.63268e-05	0.00077845	1	AT2G47450.1	2.79294	0.000585664	0.0155461	0.999999	AT2G47450.1	2.37354	0.000281728	0.00324658	1	AT2G47450.1	1.4485	0.103598	0.495749	0.370533	AT2G47450.1	1.3367	0.0291543	0.354165	0.688543	AT2G47450.1	0.985179	0.920357	0.976169	0.0508803	AT2G47450.1	1.12215	0.213552	0.778165	0.217557	AT2G47450.1	1.33308	0.0155523
plastid	AT1G26761.1	| Arabinanase/levansucrase/invertase | Chr1:9250269-9251603 REVERSE LENGTH=444 | 201606	2	2	1.972	49740.6	AT1G26761.1	3.71775	0.0438266	0.0804649	0.586624	AT1G26761.1	3.54586	0.0103226	0.0230388	0.89317	AT1G26761.1	4.47823	0.0257742	0.100141	0.736158	AT1G26761.1	1.39953	0.353633	0.473936	0.13536	AT1G26761.1	1.47187	0.89052	0.964746	0.0516706	AT1G26761.1	0.413637	0.194562	0.673972	0.23478	AT1G26761.1	0.74029	0.303722	0.795303	0.157682	AT1G26761.1	1.04848	0.899477	0.977745	0.0514435	AT1G26761.1	0.830182	0.643363
plastid	AT5G24490.1	| 30S ribosomal protein | Chr5:8365690-8367178 FORWARD LENGTH=308 | 201606	3	3	2.988	34856.3	AT5G24490.1	3.70434	0.000465099	0.0030303	0.999991	AT5G24490.1	3.67772	0.000272358	0.00163608	1	AT5G24490.1	2.37643	0.176007	0.315735	0.245297	AT5G24490.1	2.23637	0.00145572	0.0093883	0.998598	AT5G24490.1	1.6683	0.00909132	0.212839	0.910262	AT5G24490.1	1.7416	0.00623537	0.162503	0.950115	AT5G24490.1	1.30322	0.0782972	0.742917	0.438601	AT5G24490.1	1.00724	0.990975	0.998213	0.0500116	AT5G24490.1	1.55878	0.174831
plastid	AT4G39980.1	| 3-deoxy-D-arabino-heptulosonate 7-phosphate synthase 1 | Chr4:18539654-18541832 FORWARD LENGTH=525 | 201606	5	3	4.972	57979.5	AT4G39980.1	3.70174	0.000238099	0.0019548	1	AT4G39980.1	3.3398	5.48138e-05	0.000577625	1	AT4G39980.1	2.48572	0.00295586	0.0313605	0.996189	AT4G39980.1	1.72491	0.00280586	0.0145504	0.99051	AT4G39980.1	1.27388	0.107458	0.502855	0.361932	AT4G39980.1	1.2893	0.19056	0.671153	0.238787	AT4G39980.1	1.14495	0.174403	0.763824	0.256256	AT4G39980.1	1.10837	0.438311	0.828323	0.108562	AT4G39980.1	1.4892	0.0434536
plastid	AT2G04700.1;AT2G04700.3	| ferredoxin thioredoxin reductase catalytic beta chain family protein | Chr2:1646961-1648345 FORWARD LENGTH=146 | 201606 [AT2G04700.1,AT2G04700.3]	3	2	2.974	16433.7	AT2G04700.1;AT2G04700.3	3.70146	0.000117609	0.00129933	1	AT2G04700.1;AT2G04700.3	3.10286	3.23302e-06	0.000102689	1	AT2G04700.1;AT2G04700.3	3.03949	0.00052342	0.0147575	1	AT2G04700.1;AT2G04700.3	2.05225	3.26806e-05	0.000998065	1	AT2G04700.1;AT2G04700.3	1.25891	0.0216177	0.289109	0.757751	AT2G04700.1;AT2G04700.3	1.40008	0.00620653	0.162503	0.950509	AT2G04700.1;AT2G04700.3	1.10952	0.80072	0.938408	0.0556549	AT2G04700.1;AT2G04700.3	1.19292	0.167502	0.745213	0.263482	AT2G04700.1;AT2G04700.3	1.21779	0.239071
plastid	AT3G14110.1;AT3G14110.3	| Tetratricopeptide repeat (TPR)-like superfamily protein | Chr3:4676222-4677602 REVERSE LENGTH=316 | 201606 [AT3G14110.1,AT3G14110.3]	6	6	6.933	34588.6	AT3G14110.1;AT3G14110.3	3.68688	2.62355e-05	0.000553231	1	AT3G14110.1;AT3G14110.3	3.66505	4.00073e-05	0.000482938	1	AT3G14110.1;AT3G14110.3	2.96136	0.000712904	0.0168511	0.999998	AT3G14110.1;AT3G14110.3	2.41527	0.000119365	0.00204925	1	AT3G14110.1;AT3G14110.3	1.03765	0.854743	0.954473	0.0529614	AT3G14110.1;AT3G14110.3	1.07462	0.86275	0.972388	0.0526393	AT3G14110.1;AT3G14110.3	1.02392	0.803995	0.939233	0.055465	AT3G14110.1;AT3G14110.3	1.00596	0.9026	0.978415	0.0513546	AT3G14110.1;AT3G14110.3	1.245	0.0239236
plastid	AT4G34350.1	| 4-hydroxy-3-methylbut-2-enyl diphosphate reductase | Chr4:16428681-16431038 REVERSE LENGTH=466 | 201606	18	14	20.837	52781.5	AT4G34350.1	3.68062	0.000428013	0.0028724	0.999994	AT4G34350.1	3.46866	0.000242605	0.0014999	1	AT4G34350.1	3.112	0.00521856	0.0417178	0.979904	AT4G34350.1	2.42637	0.00125062	0.00845062	0.999175	AT4G34350.1	1.55813	0.069639	0.446569	0.468028	AT4G34350.1	1.40723	0.0456465	0.429613	0.576198	AT4G34350.1	1.19792	0.222147	0.774095	0.210053	AT4G34350.1	1.0611	0.561322	0.875448	0.0818329	AT4G34350.1	1.18272	0.27702
plastid	AT1G79850.1	| ribosomal protein S17 | Chr1:30041473-30041922 REVERSE LENGTH=149 | 201606	5	4	5.965	16282.2	AT1G79850.1	3.66417	3.25898e-05	0.000611148	1	AT1G79850.1	3.45827	5.35197e-05	0.000571402	1	AT1G79850.1	3.41612	0.000243926	0.0109682	1	AT1G79850.1	2.21398	1.49133e-05	0.000630061	1	AT1G79850.1	1.31051	0.0827122	0.463359	0.424991	AT1G79850.1	1.33581	0.0756043	0.497696	0.447342	AT1G79850.1	1.25242	0.013794	0.60432	0.847103	AT1G79850.1	1.05954	0.619248	0.896155	0.0730265	AT1G79850.1	1.07261	0.586984
plastid	AT1G69740.1;AT1G69740.2;AT1G69740.3	| Aldolase superfamily protein | Chr1:26232197-26234713 FORWARD LENGTH=430 | 201606 [AT1G69740.1,AT1G69740.2,AT1G69740.3]	13	12	12.957	46691.5	AT1G69740.1;AT1G69740.2;AT1G69740.3	3.66379	1.42422e-05	0.000384789	1	AT1G69740.1;AT1G69740.2;AT1G69740.3	3.58394	1.61937e-05	0.0002766	1	AT1G69740.1;AT1G69740.2;AT1G69740.3	3.27342	0.00162246	0.0242511	0.999663	AT1G69740.1;AT1G69740.2;AT1G69740.3	2.95421	8.16765e-05	0.00162141	1	AT1G69740.1;AT1G69740.2;AT1G69740.3	1.60979	0.0512889	0.4042	0.546248	AT1G69740.1;AT1G69740.2;AT1G69740.3	1.48922	0.0143803	0.250337	0.839702	AT1G69740.1;AT1G69740.2;AT1G69740.3	1.17685	0.0914897	0.742917	0.400294	AT1G69740.1;AT1G69740.2;AT1G69740.3	1.02228	0.268744	0.792024	0.178084	AT1G69740.1;AT1G69740.2;AT1G69740.3	1.11925	0.278146
plastid	AT3G44890.1	| ribosomal protein L9 | Chr3:16386505-16387963 FORWARD LENGTH=197 | 201606	10	8	11.908	22134.5	AT3G44890.1	3.65448	2.72801e-05	0.000563566	1	AT3G44890.1	3.3073	1.36288e-05	0.000247753	1	AT3G44890.1	3.2346	0.000305389	0.0120108	1	AT3G44890.1	2.15414	0.000495698	0.00468241	0.999987	AT3G44890.1	1.50429	0.0337388	0.349645	0.652755	AT3G44890.1	1.44945	0.00740159	0.178635	0.933962	AT3G44890.1	1.07624	0.35189	0.810716	0.136052	AT3G44890.1	1.10497	0.127236	0.72179	0.320118	AT3G44890.1	1.12981	0.18077
plasma membrane	AT1G49340.1;AT1G49340.2;AT1G49340.3;AT1G49340.4	| Phosphatidylinositol 3- and 4-kinase family protein | Chr1:18252355-18263967 FORWARD LENGTH=2028 | 201606 [AT1G49340.1,AT1G49340.2,AT1G49340.3,AT1G49340.4]	4	3	3.932	224021	AT1G49340.1;AT1G49340.2;AT1G49340.3;AT1G49340.4	3.65011	0.00350349	0.0119897	0.983938	AT1G49340.1;AT1G49340.2;AT1G49340.3;AT1G49340.4	2.87421	0.00876145	0.020285	0.91488	AT1G49340.1;AT1G49340.2;AT1G49340.3;AT1G49340.4	1.25758	0.915943	0.948164	0.0508971	AT1G49340.1;AT1G49340.2;AT1G49340.3;AT1G49340.4	1.49409	0.139465	0.235547	0.303014	AT1G49340.1;AT1G49340.2;AT1G49340.3;AT1G49340.4	1.16567	0.80531	0.93609	0.0553898	AT1G49340.1;AT1G49340.2;AT1G49340.3;AT1G49340.4	0.395412	0.0765989	0.499071	0.444073	AT1G49340.1;AT1G49340.2;AT1G49340.3;AT1G49340.4	0.700897	0.42681	0.829464	0.11075	AT1G49340.1;AT1G49340.2;AT1G49340.3;AT1G49340.4	1.26995	0.146537	0.730531	0.290453	AT1G49340.1;AT1G49340.2;AT1G49340.3;AT1G49340.4	2.90249	0.0288456
plastid	AT4G29060.1	| elongation factor Ts family protein | Chr4:14317744-14321315 FORWARD LENGTH=953 | 201606	38	36	47.619	103782	AT4G29060.1	3.64766	4.86761e-05	0.000770133	1	AT4G29060.1	3.40168	4.45275e-05	0.000514292	1	AT4G29060.1	3.12068	0.0225628	0.0921738	0.769005	AT4G29060.1	2.63823	0.000254533	0.00311696	1	AT4G29060.1	1.49031	0.0360186	0.354741	0.636424	AT4G29060.1	1.51952	0.072419	0.492682	0.45815	AT4G29060.1	1.08485	0.632681	0.884047	0.0707663	AT4G29060.1	1.07231	0.11916	0.71572	0.334268	AT4G29060.1	1.16887	0.388119
plastid	AT3G54900.1	| CAX interacting protein 1 | Chr3:20341850-20342371 REVERSE LENGTH=173 | 201606	2	1	1.994	19309.6	AT3G54900.1	3.63058	0.0446201	0.0816627	0.582028	AT3G54900.1	4.09396	0.0286215	0.0519122	0.692984	AT3G54900.1	3.96561	0.0752512	0.186781	0.445162	AT3G54900.1	3.38738	0.041625	0.0953305	0.599794	AT3G54900.1	2.25211	0.407147	0.762925	0.116604	AT3G54900.1	1.46336	0.69456	0.927762	0.0638671	AT3G54900.1	1.33199	0.366509	0.81327	0.130423	AT3G54900.1	0.886815	0.392624	0.805898	0.12237	AT3G54900.1	0.915516	0.72314
plastid	AT4G25650.1;AT4G25650.2	| ACD1-like protein | Chr4:13081021-13083153 REVERSE LENGTH=536 | 201606 [AT4G25650.1,AT4G25650.2]	2	2	1.984	61264.7	AT4G25650.1;AT4G25650.2	3.63048	0.0071688	0.0202512	0.937215	AT4G25650.1;AT4G25650.2	3.68161	0.00360819	0.0103656	0.982847	AT4G25650.1;AT4G25650.2	4.5261	0.0070713	0.0490983	0.959864	AT4G25650.1;AT4G25650.2	2.73645	0.00189509	0.0112642	0.996758	AT4G25650.1;AT4G25650.2	1.6839	0.0240565	0.303149	0.733756	AT4G25650.1;AT4G25650.2	1.64253	0.144121	0.629513	0.295915	AT4G25650.1;AT4G25650.2	1.5199	0.0798173	0.742917	0.433817	AT4G25650.1;AT4G25650.2	0.986113	0.910573	0.981708	0.0511406	AT4G25650.1;AT4G25650.2	0.802122	0.487114
plastid	AT5G03900.2	| Iron-sulfur cluster biosynthesis family protein | Chr5:1048338-1051869 FORWARD LENGTH=523 | 201606	2	2	1.987	59503.4	AT5G03900.2	3.63041	0.000415283	0.00282377	0.999995	AT5G03900.2	3.78816	0.000401716	0.00212659	0.999996	AT5G03900.2	2.90278	0.0769164	0.189109	0.439365	AT5G03900.2	3.14223	0.00164449	0.0100812	0.997909	AT5G03900.2	1.26497	0.726932	0.905088	0.0609159	AT5G03900.2	2.10449	0.0722828	0.492414	0.458625	AT5G03900.2	1.61528	0.175086	0.763824	0.255472	AT5G03900.2	0.958357	0.524598	0.855418	0.0885214	AT5G03900.2	1.25067	0.325023
plastid	AT5G51070.1	| Clp ATPase | Chr5:20764479-20768481 FORWARD LENGTH=945 | 201606	3	1	2.948	103240	AT5G51070.1	3.6295	0.00248124	0.00939616	0.99308	AT5G51070.1	4.61013	6.78658e-06	0.000165815	1	AT5G51070.1	4.24294	0.0172159	0.0793794	0.829959	AT5G51070.1	3.64916	0.00015586	0.00234343	1	AT5G51070.1	1.71152	0.0242812	0.303149	0.731627	AT5G51070.1	1.39213	0.00363574	0.128311	0.982556	AT5G51070.1	1.215	0.0130129	0.594609	0.857142	AT5G51070.1	0.787289	0.19637	0.75903	0.232948	AT5G51070.1	0.855423	0.779619
plasma membrane	AT5G03280.1	| NRAMP metal ion transporter family protein | Chr5:788589-793066 FORWARD LENGTH=1294 | 201606	7	5	6.95	140959	AT5G03280.1	3.62527	0.341893	0.431356	0.14013	AT5G03280.1	1.06893	0.849729	0.8786	0.053173	AT5G03280.1	0.969492	0.960251	0.976143	0.0501997	AT5G03280.1	1.05688	0.653124	0.741053	0.0682913	AT5G03280.1	0.949498	0.996073	0.998974	0.0500021	AT5G03280.1	0.91896	0.819659	0.964873	0.0546052	AT5G03280.1	0.820826	0.554924	0.861558	0.0822353	AT5G03280.1	3.39149	0.305365	0.796387	0.157953	AT5G03280.1	3.73935	0.337379
nucleus	AT5G58190.1;AT5G58190.2	| evolutionarily conserved C-terminal region 10 | Chr5:23546434-23549363 FORWARD LENGTH=527 | 201606 [AT5G58190.1,AT5G58190.2]	3	3	2.991	58342.5	AT5G58190.1;AT5G58190.2	3.62116	0.0184053	0.0409727	0.79203	AT5G58190.1;AT5G58190.2	1.90253	0.163888	0.224193	0.268886	AT5G58190.1;AT5G58190.2	1.24535	0.710597	0.80161	0.0613219	AT5G58190.1;AT5G58190.2	1.2209	0.470707	0.584466	0.0992929	AT5G58190.1;AT5G58190.2	1.74771	0.121301	0.52616	0.334005	AT5G58190.1;AT5G58190.2	1.26052	0.847912	0.965986	0.0532516	AT5G58190.1;AT5G58190.2	0.987238	0.924484	0.978186	0.050791	AT5G58190.1;AT5G58190.2	1.90333	0.0624594	0.640197	0.483111	AT5G58190.1;AT5G58190.2	2.90774	0.119429
cytosol	AT4G39540.1;AT4G39540.2	| shikimate kinase 2 | Chr4:18378561-18380253 FORWARD LENGTH=300 | 201606 [AT4G39540.1,AT4G39540.2]	2	1	1.956	33778.5	AT4G39540.1;AT4G39540.2	3.61591	0.0170037	0.0387155	0.808013	AT4G39540.1;AT4G39540.2	4.62873	0.0280135	0.0510817	0.698128	AT4G39540.1;AT4G39540.2	1.39685	0.0575481	0.159704	0.517911	AT4G39540.1;AT4G39540.2	0.843944	0.392615	0.510853	0.121262	AT4G39540.1;AT4G39540.2	2.04547	0.0765431	0.459216	0.444255	AT4G39540.1;AT4G39540.2	0.883837	0.554057	0.882838	0.0823837	AT4G39540.1;AT4G39540.2	1.47824	0.39166	0.81832	0.121579	AT4G39540.1;AT4G39540.2	0.781189	0.725449	0.926106	0.061317	AT4G39540.1;AT4G39540.2	2.58862	0.0542482
plastid	AT4G04770.1;AT5G44316.1	| ATP binding cassette protein 1 | Chr4:2427998-2429785 REVERSE LENGTH=557 | 201606	12	12	11.917	61869.8	AT4G04770.1;AT5G44316.1	3.60814	9.30987e-06	0.000309234	1	AT4G04770.1;AT5G44316.1	3.21466	9.18058e-06	0.000193592	1	AT4G04770.1;AT5G44316.1	2.84235	9.53293e-05	0.00714033	1	AT4G04770.1;AT5G44316.1	2.0992	3.27975e-05	0.000998065	1	AT4G04770.1;AT5G44316.1	1.60101	0.0418657	0.379052	0.598323	AT4G04770.1;AT5G44316.1	1.33669	0.129283	0.607154	0.31969	AT4G04770.1;AT5G44316.1	1.21786	0.138543	0.751498	0.304456	AT4G04770.1;AT5G44316.1	1.1224	0.0975086	0.695384	0.37886	AT4G04770.1;AT5G44316.1	1.26942	0.0117777
plastid	AT4G19170.1	| nine-cis-epoxycarotenoid dioxygenase 4 | Chr4:10481835-10483622 FORWARD LENGTH=595 | 201606	2	2	1.97	65603.3	AT4G19170.1	3.60473	0.0286321	0.0581804	0.692894	AT4G19170.1	3.04994	0.0317702	0.0567509	0.667613	AT4G19170.1	1.86662	0.167052	0.304466	0.255826	AT4G19170.1	0.667818	0.579751	0.680237	0.0781886	AT4G19170.1	0.77654	0.68863	0.890714	0.0644542	AT4G19170.1	0.205796	0.0270024	0.345658	0.706869	AT4G19170.1	0.297752	0.113473	0.743909	0.349269	AT4G19170.1	1.1819	0.632636	0.896881	0.0712578	AT4G19170.1	1.93115	0.0775152
vacuole	AT4G28770.1;AT4G28770.2	| Tetraspanin family protein | Chr4:14212177-14213518 REVERSE LENGTH=281 | 201606 [AT4G28770.1,AT4G28770.2]	3	3	2.991	30978.2	AT4G28770.1;AT4G28770.2	3.60371	0.00234876	0.00904957	0.994025	AT4G28770.1;AT4G28770.2	3.47234	0.00200771	0.00669941	0.996155	AT4G28770.1;AT4G28770.2	2.57314	0.086258	0.201825	0.409446	AT4G28770.1;AT4G28770.2	2.68308	0.00870757	0.0310976	0.915636	AT4G28770.1;AT4G28770.2	1.72416	0.137939	0.553122	0.305409	AT4G28770.1;AT4G28770.2	1.77346	0.113433	0.575317	0.34935	AT4G28770.1;AT4G28770.2	2.12083	0.101558	0.742917	0.375242	AT4G28770.1;AT4G28770.2	1.03783	0.699854	0.917214	0.0636832	AT4G28770.1;AT4G28770.2	1.40051	0.190075
mitochondrion	AT1G15810.1	| S15/NS1%2C RNA-binding protein | Chr1:5444496-5446271 FORWARD LENGTH=419 | 201606	2	2	1.99	47330.8	AT1G15810.1	3.60054	0.00315656	0.0111674	0.987369	AT1G15810.1	1.55586	0.743378	0.793165	0.0595733	AT1G15810.1	2.08147	0.080451	0.194229	0.427546	AT1G15810.1	0.983202	0.901732	0.932371	0.0513435	AT1G15810.1	0.995324	0.981259	0.995332	0.0500485	AT1G15810.1	0.98271	0.916615	0.986079	0.0509654	AT1G15810.1	0.99374	0.999039	0.999039	0.0500001	AT1G15810.1	2.31418	0.079134	0.669977	0.427037	AT1G15810.1	1.7298	0.127031
mitochondrion	AT3G58840.1;AT3G58840.2	| Tropomyosin-like protein | Chr3:21757499-21758455 REVERSE LENGTH=318 | 201606 [AT3G58840.1,AT3G58840.2]	6	6	5.909	36595.7	AT3G58840.1;AT3G58840.2	3.59476	0.00675913	0.0194287	0.942911	AT3G58840.1;AT3G58840.2	3.79501	0.00703694	0.0171109	0.939053	AT3G58840.1;AT3G58840.2	3.63606	0.0172358	0.0793794	0.829718	AT3G58840.1;AT3G58840.2	1.47999	0.107931	0.194023	0.360905	AT3G58840.1;AT3G58840.2	1.16504	0.435605	0.780588	0.108284	AT3G58840.1;AT3G58840.2	0.826023	0.659728	0.917108	0.0675344	AT3G58840.1;AT3G58840.2	0.892674	0.890152	0.964348	0.0516819	AT3G58840.1;AT3G58840.2	0.947235	0.837393	0.962218	0.0538235	AT3G58840.1;AT3G58840.2	0.988644	0.970412
cytosol	AT2G39390.1;AT3G55170.1;AT3G55170.2;AT3G55170.5;AT5G02610.2	| Ribosomal L29 family protein | Chr2:16450803-16451762 REVERSE LENGTH=123 | 201606	2	2	2.968	14232.1	AT2G39390.1;AT3G55170.1;AT3G55170.2;AT3G55170.5;AT5G02610.2	3.59447	6.86493e-05	0.000950615	1	AT2G39390.1;AT3G55170.1;AT3G55170.2;AT3G55170.5;AT5G02610.2	2.95675	0.000153162	0.00111817	1	AT2G39390.1;AT3G55170.1;AT3G55170.2;AT3G55170.5;AT5G02610.2	3.06832	0.0413578	0.132272	0.609622	AT2G39390.1;AT3G55170.1;AT3G55170.2;AT3G55170.5;AT5G02610.2	1.46671	0.0133959	0.0416125	0.852194	AT2G39390.1;AT3G55170.1;AT3G55170.2;AT3G55170.5;AT5G02610.2	1.59244	0.0274779	0.320135	0.702729	AT2G39390.1;AT3G55170.1;AT3G55170.2;AT3G55170.5;AT5G02610.2	1.27103	0.200513	0.674966	0.229034	AT2G39390.1;AT3G55170.1;AT3G55170.2;AT3G55170.5;AT5G02610.2	1.38473	0.0646944	0.742917	0.486724	AT2G39390.1;AT3G55170.1;AT3G55170.2;AT3G55170.5;AT5G02610.2	1.21568	0.123409	0.719837	0.326679	AT2G39390.1;AT3G55170.1;AT3G55170.2;AT3G55170.5;AT5G02610.2	1.17148	0.435279
plastid	AT5G30510.1	| ribosomal protein S1 | Chr5:11619262-11621223 REVERSE LENGTH=416 | 201606	16	13	15.774	45111.1	AT5G30510.1	3.58889	0.000127559	0.00135092	1	AT5G30510.1	3.38226	2.6627e-05	0.000371754	1	AT5G30510.1	3.23282	0.00795223	0.0520733	0.949156	AT5G30510.1	2.66526	5.0824e-05	0.00124777	1	AT5G30510.1	1.18015	0.556165	0.833627	0.0820234	AT5G30510.1	1.36165	0.00792271	0.184324	0.926655	AT5G30510.1	1.10111	0.20655	0.769564	0.223449	AT5G30510.1	1.06109	0.617385	0.894477	0.0732801	AT5G30510.1	1.11014	0.534164
plastid	AT3G16000.1	| MAR binding filament-like protein 1 | Chr3:5431041-5433613 REVERSE LENGTH=726 | 201606	25	22	28.778	81975.7	AT3G16000.1	3.58626	1.08867e-05	0.000327373	1	AT3G16000.1	3.07604	1.42133e-05	0.00025168	1	AT3G16000.1	3.17988	0.0191111	0.0838763	0.807443	AT3G16000.1	2.38471	3.5446e-05	0.00104731	1	AT3G16000.1	1.30327	0.0655529	0.434098	0.483368	AT3G16000.1	1.21309	0.132678	0.616643	0.313944	AT3G16000.1	0.991422	0.912786	0.971675	0.0510566	AT3G16000.1	1.16587	0.0305853	0.559862	0.652606	AT3G16000.1	1.1278	0.456246
plasma membrane	AT1G08820.1;AT1G08820.2;AT1G08820.3;AT1G08820.4;AT1G08820.5	| vamp/synaptobrevin-associated protein 27-2 | Chr1:2821810-2824412 REVERSE LENGTH=386 | 201606 [AT1G08820.1,AT1G08820.2,AT1G08820.3,AT1G08820.4,AT1G08820.5]	6	5	5.94	43270.1	AT1G08820.1;AT1G08820.2;AT1G08820.3;AT1G08820.4;AT1G08820.5	3.56383	0.0414809	0.0769646	0.600678	AT1G08820.1;AT1G08820.2;AT1G08820.3;AT1G08820.4;AT1G08820.5	1.21442	0.370088	0.446107	0.129102	AT1G08820.1;AT1G08820.2;AT1G08820.3;AT1G08820.4;AT1G08820.5	1.04679	0.902037	0.93899	0.0512209	AT1G08820.1;AT1G08820.2;AT1G08820.3;AT1G08820.4;AT1G08820.5	0.509549	0.38061	0.500843	0.125342	AT1G08820.1;AT1G08820.2;AT1G08820.3;AT1G08820.4;AT1G08820.5	0.543217	0.448863	0.785473	0.104735	AT1G08820.1;AT1G08820.2;AT1G08820.3;AT1G08820.4;AT1G08820.5	0.697586	0.769787	0.951155	0.0576259	AT1G08820.1;AT1G08820.2;AT1G08820.3;AT1G08820.4;AT1G08820.5	0.747556	0.857752	0.956782	0.0528381	AT1G08820.1;AT1G08820.2;AT1G08820.3;AT1G08820.4;AT1G08820.5	2.93459	0.012337	0.462063	0.835254	AT1G08820.1;AT1G08820.2;AT1G08820.3;AT1G08820.4;AT1G08820.5	3.40455	0.0408871
plasma membrane	AT4G12980.1	| Auxin-responsive family protein | Chr4:7589670-7591074 REVERSE LENGTH=394 | 201606	4	4	3.977	42230.1	AT4G12980.1	3.56298	0.000786055	0.00430054	0.999872	AT4G12980.1	2.84905	0.00146185	0.00523917	0.998578	AT4G12980.1	2.12403	0.116878	0.244772	0.334425	AT4G12980.1	1.8726	0.00875249	0.0311487	0.915006	AT4G12980.1	1.07915	0.582103	0.844698	0.0778251	AT4G12980.1	1.28542	0.176469	0.658507	0.253898	AT4G12980.1	1.29211	0.172477	0.763824	0.258489	AT4G12980.1	1.25059	0.0827516	0.674897	0.416599	AT4G12980.1	1.67746	0.0824289
nucleus	AT5G58320.1;AT5G58320.2;AT5G58320.4;AT5G58320.5	| Kinase interacting (KIP1-like) family protein | Chr5:23577728-23579641 FORWARD LENGTH=525 | 201606 [AT5G58320.1,AT5G58320.2,AT5G58320.4,AT5G58320.5]	2	1	1.978	60124.9	AT5G58320.1;AT5G58320.2;AT5G58320.4;AT5G58320.5	3.55624	0.917745	0.938801	0.0509393	AT5G58320.1;AT5G58320.2;AT5G58320.4;AT5G58320.5	0.499758	0.0800246	0.122903	0.433173	AT5G58320.1;AT5G58320.2;AT5G58320.4;AT5G58320.5	0.856053	0.635765	0.744118	0.0687112	AT5G58320.1;AT5G58320.2;AT5G58320.4;AT5G58320.5	0.624316	0.152287	0.252092	0.284175	AT5G58320.1;AT5G58320.2;AT5G58320.4;AT5G58320.5	0.859242	0.58837	0.849459	0.0768727	AT5G58320.1;AT5G58320.2;AT5G58320.4;AT5G58320.5	0.824598	0.46316	0.835474	0.101119	AT5G58320.1;AT5G58320.2;AT5G58320.4;AT5G58320.5	1.11265	0.534405	0.855027	0.0858873	AT5G58320.1;AT5G58320.2;AT5G58320.4;AT5G58320.5	7.11594	0.667699	0.906128	0.0670478	AT5G58320.1;AT5G58320.2;AT5G58320.4;AT5G58320.5	4.15423	0.986885
mitochondrion,plastid	AT3G13490.1	| Lysyl-tRNA synthetase%2C class II | Chr3:4395984-4399302 REVERSE LENGTH=602 | 201606	5	4	4.97	67590	AT3G13490.1	3.55147	0.000609754	0.00359904	0.999961	AT3G13490.1	3.74769	0.000103168	0.000882661	1	AT3G13490.1	4.54626	0.00297823	0.0314664	0.996089	AT3G13490.1	2.91417	0.0013366	0.00885603	0.998955	AT3G13490.1	1.42713	0.644336	0.873831	0.0693304	AT3G13490.1	1.17885	0.972361	0.992933	0.0501056	AT3G13490.1	1.15975	0.129341	0.749717	0.31959	AT3G13490.1	0.947644	0.687228	0.911699	0.0649506	AT3G13490.1	0.781186	0.386571
nucleus	AT5G45420.1;AT5G45420.2;AT5G45420.3	| Duplicated homeodomain-like superfamily protein | Chr5:18405668-18406597 REVERSE LENGTH=309 | 201606 [AT5G45420.1,AT5G45420.2,AT5G45420.3]	6	6	5.909	34364	AT5G45420.1;AT5G45420.2;AT5G45420.3	3.53935	0.00053424	0.00334656	0.99998	AT5G45420.1;AT5G45420.2;AT5G45420.3	2.78003	0.000733174	0.00324281	0.999907	AT5G45420.1;AT5G45420.2;AT5G45420.3	1.54831	0.417302	0.556914	0.108866	AT5G45420.1;AT5G45420.2;AT5G45420.3	1.00795	0.865485	0.905765	0.0525337	AT5G45420.1;AT5G45420.2;AT5G45420.3	0.953632	0.739855	0.913716	0.0598524	AT5G45420.1;AT5G45420.2;AT5G45420.3	0.865502	0.358323	0.775141	0.133528	AT5G45420.1;AT5G45420.2;AT5G45420.3	0.842775	0.204895	0.769564	0.224957	AT5G45420.1;AT5G45420.2;AT5G45420.3	1.27313	0.153607	0.737184	0.28082	AT5G45420.1;AT5G45420.2;AT5G45420.3	2.28594	0.0376435
cytosol	AT5G10230.1	| annexin 7 | Chr5:3209738-3211396 REVERSE LENGTH=316 | 201606	2	1	1.993	36497.4	AT5G10230.1	3.5385	0.0764578	0.127188	0.444534	AT5G10230.1	3.40072	0.0958143	0.142881	0.389143	AT5G10230.1	1.88492	0.37528	0.518817	0.121782	AT5G10230.1	1.34778	0.47563	0.588832	0.0981315	AT5G10230.1	0.735139	0.850527	0.952021	0.0531388	AT5G10230.1	1.09104	0.391924	0.797341	0.121491	AT5G10230.1	0.929335	0.561084	0.864993	0.0811945	AT5G10230.1	1.04052	0.727629	0.926282	0.0611276	AT5G10230.1	1.87727	0.129613
plastid	AT4G31530.1	| NAD(P)-binding Rossmann-fold superfamily protein | Chr4:15282281-15284064 FORWARD LENGTH=324 | 201606	2	1	1.994	35228.7	AT4G31530.1	3.53682	0.00408951	0.0133627	0.97754	AT4G31530.1	2.89939	0.00640954	0.0158894	0.947732	AT4G31530.1	3.17212	0.0175249	0.0801334	0.826221	AT4G31530.1	2.16083	0.0221833	0.0604563	0.752038	AT4G31530.1	1.02645	0.854938	0.954481	0.0529533	AT4G31530.1	0.917362	0.978376	0.995019	0.0500646	AT4G31530.1	0.810914	0.603991	0.876294	0.0745978	AT4G31530.1	1.21985	0.0400197	0.591426	0.589748	AT4G31530.1	1.11497	0.368997
plastid	AT1G58080.1	| ATP phosphoribosyl transferase 1 | Chr1:21504562-21507429 REVERSE LENGTH=411 | 201606	5	4	5.815	44556.8	AT1G58080.1	3.52795	0.000121506	0.00132151	1	AT1G58080.1	2.56024	0.00593069	0.0150024	0.954249	AT1G58080.1	2.75977	0.00210282	0.0270785	0.998939	AT1G58080.1	1.95468	0.00137851	0.00908636	0.998837	AT1G58080.1	1.21534	0.369419	0.739421	0.129347	AT1G58080.1	1.29133	0.0926596	0.535109	0.397216	AT1G58080.1	1.04454	0.649239	0.889814	0.0687461	AT1G58080.1	1.37797	0.0676003	0.650433	0.464243	AT1G58080.1	1.27835	0.041103
plastid	AT2G41680.1	| NADPH-dependent thioredoxin reductase C | Chr2:17376349-17379028 REVERSE LENGTH=529 | 201606	9	8	9.845	57949.8	AT2G41680.1	3.5279	0.000115387	0.00128314	1	AT2G41680.1	3.54022	2.58545e-05	0.000367019	1	AT2G41680.1	3.36373	0.00418863	0.0374764	0.988758	AT2G41680.1	2.30834	0.000373614	0.00390681	0.999997	AT2G41680.1	1.3287	0.179166	0.599818	0.250877	AT2G41680.1	1.0915	0.411877	0.805721	0.115151	AT2G41680.1	0.986175	0.884636	0.963554	0.0518568	AT2G41680.1	0.99652	0.899122	0.977745	0.0514538	AT2G41680.1	1.04881	0.685164
golgi	AT5G01010.1;AT5G01010.2;AT5G01010.3;AT5G01010.4;AT5G01010.5	| retinal-binding protein | Chr5:1388-4924 REVERSE LENGTH=438 | 201606 [AT5G01010.1,AT5G01010.2,AT5G01010.3,AT5G01010.4,AT5G01010.5]	11	8	10.914	50435.5	AT5G01010.1;AT5G01010.2;AT5G01010.3;AT5G01010.4;AT5G01010.5	3.524	7.30312e-05	0.000989718	1	AT5G01010.1;AT5G01010.2;AT5G01010.3;AT5G01010.4;AT5G01010.5	2.9552	5.34942e-06	0.000138703	1	AT5G01010.1;AT5G01010.2;AT5G01010.3;AT5G01010.4;AT5G01010.5	1.66273	0.0501021	0.147413	0.556308	AT5G01010.1;AT5G01010.2;AT5G01010.3;AT5G01010.4;AT5G01010.5	1.32758	0.00576504	0.0233636	0.956474	AT5G01010.1;AT5G01010.2;AT5G01010.3;AT5G01010.4;AT5G01010.5	0.977922	0.795086	0.93317	0.0559898	AT5G01010.1;AT5G01010.2;AT5G01010.3;AT5G01010.4;AT5G01010.5	1.11716	0.555367	0.883648	0.0821596	AT5G01010.1;AT5G01010.2;AT5G01010.3;AT5G01010.4;AT5G01010.5	1.06329	0.462342	0.838412	0.10132	AT5G01010.1;AT5G01010.2;AT5G01010.3;AT5G01010.4;AT5G01010.5	1.19248	0.0925615	0.683612	0.390726	AT5G01010.1;AT5G01010.2;AT5G01010.3;AT5G01010.4;AT5G01010.5	2.11941	0.00602
cytosol	AT5G59540.1;AT5G43440.1;AT5G59530.1	| 2-oxoglutarate (2OG) and Fe(II)-dependent oxygenase superfamily protein | Chr5:23996293-23997576 REVERSE LENGTH=366 | 201606	3	2	2.991	41540.4	AT5G59540.1;AT5G43440.1;AT5G59530.1	3.51993	5.86859e-05	0.000866981	1	AT5G59540.1;AT5G43440.1;AT5G59530.1	3.24632	2.57106e-05	0.000365999	1	AT5G59540.1;AT5G43440.1;AT5G59530.1	2.04723	0.121845	0.250999	0.324699	AT5G59540.1;AT5G43440.1;AT5G59530.1	2.67116	0.000103565	0.00186743	1	AT5G59540.1;AT5G43440.1;AT5G59530.1	1.75419	0.000912854	0.0859097	0.999757	AT5G59540.1;AT5G43440.1;AT5G59530.1	1.37046	0.0198307	0.294995	0.776426	AT5G59540.1;AT5G43440.1;AT5G59530.1	1.26113	0.219365	0.773054	0.21234	AT5G59540.1;AT5G43440.1;AT5G59530.1	1.08428	0.219607	0.778246	0.212542	AT5G59540.1;AT5G43440.1;AT5G59530.1	1.71936	0.0606354
plastid	AT1G62780.1	| dimethylallyl%2C adenosine tRNA methylthiotransferase | Chr1:23249349-23251066 REVERSE LENGTH=237 | 201606	14	12	14.931	27220.5	AT1G62780.1	3.51458	1.02629e-05	0.000319128	1	AT1G62780.1	3.53474	6.23534e-06	0.000156871	1	AT1G62780.1	3.31328	0.00179241	0.0252327	0.999467	AT1G62780.1	2.56719	1.36694e-05	0.000613617	1	AT1G62780.1	1.41933	0.0133252	0.24272	0.853104	AT1G62780.1	1.34452	0.00266241	0.117649	0.991688	AT1G62780.1	0.982692	0.838876	0.9515	0.0536574	AT1G62780.1	0.994296	0.895959	0.977601	0.0515472	AT1G62780.1	1.06076	0.582162
plastid	ATCG00420.1	| NADH dehydrogenase subunit J | ChrC:48677-49153 REVERSE LENGTH=158 | 201606	4	4	5.97	18558.7	ATCG00420.1	3.51247	0.0226089	0.0483462	0.747799	ATCG00420.1	3.05874	0.0312756	0.0559263	0.671464	ATCG00420.1	1.45082	0.3637	0.50834	0.125804	ATCG00420.1	1.38867	0.240619	0.355765	0.19587	ATCG00420.1	1.0145	0.834086	0.944488	0.0538828	ATCG00420.1	1.23145	0.414873	0.808119	0.114245	ATCG00420.1	1.31991	0.455781	0.837925	0.102959	ATCG00420.1	1.14834	0.150621	0.733901	0.284817	ATCG00420.1	2.42103	0.00633933
extracellular	AT1G56680.1;AT1G56680.2	| Chitinase family protein | Chr1:21250428-21251417 REVERSE LENGTH=280 | 201606 [AT1G56680.1,AT1G56680.2]	2	2	1.985	31183.5	AT1G56680.1;AT1G56680.2	3.50643	0.0199398	0.0436785	0.775259	AT1G56680.1;AT1G56680.2	4.7235	0.00700085	0.0170394	0.939555	AT1G56680.1;AT1G56680.2	10.5423	0.0263196	0.101484	0.730846	AT1G56680.1;AT1G56680.2	1.75569	0.747082	0.818777	0.059285	AT1G56680.1;AT1G56680.2	0.694858	0.594135	0.851718	0.076017	AT1G56680.1;AT1G56680.2	0.66978	0.560296	0.883745	0.0813262	AT1G56680.1;AT1G56680.2	1.5764	0.311213	0.799856	0.153965	AT1G56680.1;AT1G56680.2	0.742339	0.0541467	0.630929	0.517359	AT1G56680.1;AT1G56680.2	0.332606	0.0927916
plastid	AT1G63970.1	| isoprenoid F | Chr1:23738923-23740336 REVERSE LENGTH=231 | 201606	5	5	4.924	24812.7	AT1G63970.1	3.50138	0.000704183	0.00398514	0.999923	AT1G63970.1	2.82784	9.98119e-05	0.000870058	1	AT1G63970.1	3.09449	0.000667349	0.0162271	0.999998	AT1G63970.1	1.97255	1.38855e-05	0.000613617	1	AT1G63970.1	1.20769	0.0650481	0.433916	0.485335	AT1G63970.1	1.09169	0.496799	0.855237	0.0933905	AT1G63970.1	0.99034	0.860059	0.957229	0.0527454	AT1G63970.1	1.23818	0.25317	0.781634	0.187942	AT1G63970.1	1.13149	0.584323
plastid	AT3G04340.1	| FtsH extracellular protease family | Chr3:1146943-1153341 REVERSE LENGTH=1320 | 201606	2	2	1.994	152262	AT3G04340.1	3.49937	0.174007	0.24861	0.256712	AT3G04340.1	1.28009	0.331659	0.406632	0.144514	AT3G04340.1	1.46554	0.3596	0.504931	0.127282	AT3G04340.1	2.25115	0.209245	0.320972	0.221032	AT3G04340.1	0.55104	0.445889	0.784086	0.105514	AT3G04340.1	1.78397	0.290924	0.737683	0.164379	AT3G04340.1	0.894322	0.842278	0.952744	0.0535017	AT3G04340.1	2.7337	0.0460824	0.605067	0.556077	AT3G04340.1	2.38777	0.0585051
golgi	AT2G30520.1;AT2G30520.2;AT2G30520.3	| Phototropic-responsive NPH3 family protein | Chr2:13002920-13005573 REVERSE LENGTH=593 | 201606	9	7	8.754	65855.7	AT2G30520.1;AT2G30520.2;AT2G30520.3	3.49926	0.0298342	0.0599444	0.682967	AT2G30520.1;AT2G30520.2;AT2G30520.3	4.05571	0.00888365	0.0205306	0.913168	AT2G30520.1;AT2G30520.2;AT2G30520.3	1.506	0.979049	0.9876	0.0500554	AT2G30520.1;AT2G30520.2;AT2G30520.3	3.87225	0.00972309	0.0333645	0.901457	AT2G30520.1;AT2G30520.2;AT2G30520.3	3.19298	0.0161706	0.266072	0.817823	AT2G30520.1;AT2G30520.2;AT2G30520.3	2.64468	0.0869789	0.521035	0.412618	AT2G30520.1;AT2G30520.2;AT2G30520.3	1.87307	0.120526	0.747071	0.33546	AT2G30520.1;AT2G30520.2;AT2G30520.3	0.862797	0.405146	0.814622	0.118318	AT2G30520.1;AT2G30520.2;AT2G30520.3	2.32354	0.124707
golgi	AT1G24020.1;AT1G24020.2	| MLP-like protein 423 | Chr1:8500653-8501458 REVERSE LENGTH=155 | 201606 [AT1G24020.1,AT1G24020.2]	7	6	7.936	17055.2	AT1G24020.1;AT1G24020.2	3.49647	0.000161466	0.00157492	1	AT1G24020.1;AT1G24020.2	3.16905	3.46211e-06	0.000105991	1	AT1G24020.1;AT1G24020.2	2.6968	2.15307e-05	0.00405256	1	AT1G24020.1;AT1G24020.2	1.82485	0.000349489	0.0037157	0.999998	AT1G24020.1;AT1G24020.2	1.49602	0.00497412	0.161009	0.966806	AT1G24020.1;AT1G24020.2	1.29079	0.0150019	0.250789	0.831981	AT1G24020.1;AT1G24020.2	0.927248	0.298443	0.789608	0.160389	AT1G24020.1;AT1G24020.2	1.10332	0.466281	0.837165	0.101303	AT1G24020.1;AT1G24020.2	1.29653	0.103829
plastid	AT2G36250.1;AT2G36250.2;AT2G36250.3	| Tubulin/FtsZ family protein | Chr2:15197661-15199932 REVERSE LENGTH=478 | 201606 [AT2G36250.1,AT2G36250.2,AT2G36250.3]	11	7	10.901	50722.1	AT2G36250.1;AT2G36250.2;AT2G36250.3	3.49598	0.000173387	0.00164394	1	AT2G36250.1;AT2G36250.2;AT2G36250.3	3.4058	0.000131457	0.00102307	1	AT2G36250.1;AT2G36250.2;AT2G36250.3	2.46669	0.0207239	0.0876928	0.789069	AT2G36250.1;AT2G36250.2;AT2G36250.3	1.65608	0.00391588	0.017977	0.979506	AT2G36250.1;AT2G36250.2;AT2G36250.3	1.14289	0.551712	0.832004	0.0827877	AT2G36250.1;AT2G36250.2;AT2G36250.3	1.25343	0.14676	0.63122	0.292025	AT2G36250.1;AT2G36250.2;AT2G36250.3	1.01402	0.860979	0.957229	0.0527089	AT2G36250.1;AT2G36250.2;AT2G36250.3	1.02648	0.782931	0.942404	0.0569212	AT2G36250.1;AT2G36250.2;AT2G36250.3	1.41728	0.0972749
plastid	AT4G34620.1	| small subunit ribosomal protein 16 | Chr4:16535084-16536092 REVERSE LENGTH=113 | 201606	4	4	4.977	12698.9	AT4G34620.1	3.48608	0.000536029	0.00334656	0.99998	AT4G34620.1	3.72167	0.000674958	0.0030436	0.999937	AT4G34620.1	3.97678	0.0019501	0.0263575	0.999228	AT4G34620.1	3.06005	0.000820972	0.00652923	0.999845	AT4G34620.1	1.66056	0.0413989	0.377749	0.601183	AT4G34620.1	1.40165	0.233668	0.705577	0.201012	AT4G34620.1	1.14432	0.462886	0.838412	0.101186	AT4G34620.1	0.936698	0.50201	0.848569	0.0931306	AT4G34620.1	0.87661	0.106303
plastid	AT2G27820.1;AT3G44720.1;AT5G22630.1	| prephenate dehydratase 1 | Chr2:11856808-11858082 FORWARD LENGTH=424 | 201606	4	4	3.981	46102	AT2G27820.1;AT3G44720.1;AT5G22630.1	3.47798	0.0309269	0.0614908	0.674208	AT2G27820.1;AT3G44720.1;AT5G22630.1	2.46197	0.0412486	0.0705571	0.60211	AT2G27820.1;AT3G44720.1;AT5G22630.1	2.41249	0.0724931	0.182652	0.455109	AT2G27820.1;AT3G44720.1;AT5G22630.1	2.46812	0.0386956	0.0904143	0.618345	AT2G27820.1;AT3G44720.1;AT5G22630.1	2.12615	0.0594495	0.42733	0.508324	AT2G27820.1;AT3G44720.1;AT5G22630.1	1.40866	0.326529	0.759052	0.146795	AT2G27820.1;AT3G44720.1;AT5G22630.1	1.50728	0.24809	0.787972	0.190586	AT2G27820.1;AT3G44720.1;AT5G22630.1	1.41268	0.319415	0.797964	0.151186	AT2G27820.1;AT3G44720.1;AT5G22630.1	1.44165	0.357737
plastid	AT5G08410.1;AT5G08410.2	| ferredoxin/thioredoxin reductase subunit A (variable subunit) 2 | Chr5:2709974-2710528 REVERSE LENGTH=184 | 201606 [AT5G08410.1,AT5G08410.2]	3	2	2.984	20146.6	AT5G08410.1;AT5G08410.2	3.46981	0.000124969	0.00133704	1	AT5G08410.1;AT5G08410.2	3.53795	1.88786e-05	0.000308492	1	AT5G08410.1;AT5G08410.2	4.08686	0.000457984	0.0140209	1	AT5G08410.1;AT5G08410.2	2.91804	0.000267193	0.0031512	1	AT5G08410.1;AT5G08410.2	1.61077	0.00438832	0.145073	0.974038	AT5G08410.1;AT5G08410.2	1.65545	0.000596187	0.0571664	0.999965	AT5G08410.1;AT5G08410.2	1.14952	0.412834	0.822372	0.11486	AT5G08410.1;AT5G08410.2	0.98074	0.78369	0.942404	0.0568711	AT5G08410.1;AT5G08410.2	0.849016	0.284811
plastid	AT1G77590.1	| long chain acyl-CoA synthetase 9 | Chr1:29148501-29151776 REVERSE LENGTH=691 | 201606	5	4	5.842	76177.1	AT1G77590.1	3.46942	0.0378492	0.071753	0.623939	AT1G77590.1	3.33745	0.00282036	0.00858253	0.990388	AT1G77590.1	1.79906	0.226226	0.368724	0.198271	AT1G77590.1	1.14874	0.254605	0.37256	0.186169	AT1G77590.1	1.75587	0.438483	0.781617	0.107497	AT1G77590.1	0.974764	0.84624	0.965723	0.0533248	AT1G77590.1	0.999309	0.973857	0.991286	0.0500944	AT1G77590.1	1.03954	0.789609	0.945558	0.0564878	AT1G77590.1	1.92847	0.257369
plastid	ATCG00800.1	| structural constituent of ribosome | ChrC:82826-83482 REVERSE LENGTH=218 | 201606	9	7	9.914	25189.8	ATCG00800.1	3.46693	0.000811155	0.00439418	0.999853	ATCG00800.1	3.51929	0.000542962	0.00262045	0.999979	ATCG00800.1	3.27679	0.011674	0.0643796	0.900725	ATCG00800.1	2.92835	0.00147715	0.00941892	0.998528	ATCG00800.1	2.46611	0.205619	0.625541	0.224295	ATCG00800.1	1.28907	0.190263	0.671153	0.239089	ATCG00800.1	1.27669	0.130185	0.749717	0.318144	ATCG00800.1	0.985122	0.84519	0.962218	0.0534592	ATCG00800.1	1.05803	0.673658
mitochondrion	AT4G09750.1	| NAD(P)-binding Rossmann-fold superfamily protein | Chr4:6146770-6148698 FORWARD LENGTH=322 | 201606	4	3	3.877	35159.6	AT4G09750.1	3.46477	0.0171126	0.0388242	0.806748	AT4G09750.1	2.71997	0.0687949	0.108543	0.471115	AT4G09750.1	4.8739	0.0412597	0.132042	0.61028	AT4G09750.1	3.4983	0.0295444	0.0740724	0.685331	AT4G09750.1	3.22468	0.112215	0.512649	0.351848	AT4G09750.1	1.03943	0.94068	0.990793	0.0504873	AT4G09750.1	0.570064	0.44929	0.835977	0.104624	AT4G09750.1	1.27382	0.295859	0.796387	0.162813	AT4G09750.1	0.710882	0.431694
plasma membrane	AT4G15630.1	| Uncharacterized protein family (UPF0497) | Chr4:8917527-8918683 FORWARD LENGTH=190 | 201606	2	1	1.984	20109.7	AT4G15630.1	3.46	0.00408629	0.0133627	0.977577	AT4G15630.1	1.73447	0.00192379	0.00650045	0.996609	AT4G15630.1	1.97904	0.0718544	0.181674	0.457476	AT4G15630.1	1.90733	0.000434189	0.00430127	0.999994	AT4G15630.1	1.64425	0.178352	0.599818	0.251783	AT4G15630.1	1.5793	0.0121062	0.231292	0.869045	AT4G15630.1	1.69606	1.81458e-05	0.030739	1	AT4G15630.1	1.99485	0.0229051	0.525516	0.716855	AT4G15630.1	1.74832	0.13173
plastid	AT4G31390.1	| Protein kinase superfamily protein | Chr4:15233126-15236764 FORWARD LENGTH=682 | 201606	5	5	4.985	76759.2	AT4G31390.1	3.44071	0.0283443	0.0577568	0.695319	AT4G31390.1	2.87664	0.0431428	0.0733528	0.590647	AT4G31390.1	5.10798	0.0462208	0.140396	0.57874	AT4G31390.1	1.88543	0.114822	0.202375	0.346545	AT4G31390.1	1.41057	0.380863	0.747604	0.125253	AT4G31390.1	1.01841	0.97086	0.992933	0.0501174	AT4G31390.1	1.54768	0.493222	0.844115	0.0941638	AT4G31390.1	1.19609	0.475226	0.842388	0.0991481	AT4G31390.1	0.673594	0.386342
plastid	AT4G01883.1	| Polyketide cyclase / dehydrase and lipid transport protein | Chr4:813162-814800 FORWARD LENGTH=224 | 201606	5	4	5.963	25289.6	AT4G01883.1	3.44027	4.87963e-05	0.000770133	1	AT4G01883.1	3.28286	5.15519e-05	0.000556281	1	AT4G01883.1	2.56303	0.00263779	0.0296946	0.997448	AT4G01883.1	1.71875	0.00350644	0.0167724	0.983908	AT4G01883.1	1.59549	0.303945	0.692418	0.157569	AT4G01883.1	1.21394	0.604064	0.897618	0.0745874	AT4G01883.1	0.863258	0.326062	0.802443	0.147006	AT4G01883.1	1.04795	0.635392	0.898885	0.0709051	AT4G01883.1	1.34227	0.0681665
plastid	AT5G03940.1	| chloroplast signal recognition particle 54 kDa subunit | Chr5:1060265-1063257 REVERSE LENGTH=564 | 201606	17	13	17.786	61232.8	AT5G03940.1	3.42995	2.66754e-05	0.000557879	1	AT5G03940.1	3.40367	6.7241e-07	4.1673e-05	1	AT5G03940.1	3.31112	9.4165e-06	0.00251867	1	AT5G03940.1	2.81443	2.66404e-05	0.000875291	1	AT5G03940.1	1.436	0.0813794	0.4627	0.429009	AT5G03940.1	1.42944	0.000572916	0.0570894	0.999972	AT5G03940.1	0.887532	0.196555	0.76563	0.232828	AT5G03940.1	1.00772	0.979381	0.997095	0.0500603	AT5G03940.1	1.03589	0.738659
plastid	AT5G19620.1	| outer envelope protein of 80 kDa | Chr5:6623323-6627641 FORWARD LENGTH=732 | 201606	2	1	1.991	79937.2	AT5G19620.1	3.42751	0.0484919	0.0871617	0.560668	AT5G19620.1	2.47822	0.136613	0.192852	0.307519	AT5G19620.1	2.1647	0.317612	0.466234	0.144279	AT5G19620.1	4.03598	0.164688	0.267537	0.267886	AT5G19620.1	2.14543	0.567415	0.836069	0.0801505	AT5G19620.1	2.28965	0.261413	0.723798	0.181733	AT5G19620.1	1.36133	0.539966	0.858829	0.0848686	AT5G19620.1	1.38305	0.280672	0.796213	0.171092	AT5G19620.1	1.58337	0.217496
cytosol	AT2G43910.1;AT2G43910.2;AT2G43910.3	| HARMLESS TO OZONE LAYER 1 | Chr2:18184658-18186951 REVERSE LENGTH=227 | 201606 [AT2G43910.1,AT2G43910.2]	15	15	22.819	25288.6	AT2G43910.1;AT2G43910.2;AT2G43910.3	3.42545	4.31793e-05	0.000726613	1	AT2G43910.1;AT2G43910.2;AT2G43910.3	3.52557	8.11058e-06	0.000182902	1	AT2G43910.1;AT2G43910.2;AT2G43910.3	3.83176	8.63272e-05	0.00710322	1	AT2G43910.1;AT2G43910.2;AT2G43910.3	3.16648	9.35161e-06	0.000531532	1	AT2G43910.1;AT2G43910.2;AT2G43910.3	2.70823	1.77231e-05	0.0180138	1	AT2G43910.1;AT2G43910.2;AT2G43910.3	2.1142	0.0523123	0.452898	0.541167	AT2G43910.1;AT2G43910.2;AT2G43910.3	1.50887	0.00235518	0.44641	0.99398	AT2G43910.1;AT2G43910.2;AT2G43910.3	0.971602	0.70028	0.917515	0.0636417	AT2G43910.1;AT2G43910.2;AT2G43910.3	0.893964	0.297126
plastid	AT3G03890.1	| FMN binding protein | Chr3:999667-1001996 REVERSE LENGTH=321 | 201606	3	3	3.946	35052.6	AT3G03890.1	3.42361	0.0139577	0.033349	0.845025	AT3G03890.1	3.27295	0.0040816	0.0113658	0.977631	AT3G03890.1	4.53755	0.0139506	0.0710307	0.870933	AT3G03890.1	3.87332	0.00253863	0.0136732	0.992651	AT3G03890.1	1.69042	0.105824	0.499599	0.365525	AT3G03890.1	1.97908	0.0371679	0.3925	0.628522	AT3G03890.1	1.45249	0.162167	0.763824	0.27106	AT3G03890.1	1.04603	0.984798	0.997232	0.0500328	AT3G03890.1	0.754506	0.378701
plastid	AT4G30690.1	| Translation initiation factor 3 protein | Chr4:14960742-14962328 FORWARD LENGTH=281 | 201606	7	4	7.943	31824.4	AT4G30690.1	3.42212	0.00103074	0.00521218	0.999603	AT4G30690.1	2.87485	0.00145153	0.00522039	0.998612	AT4G30690.1	2.89768	0.046796	0.141612	0.575299	AT4G30690.1	1.98462	0.00734843	0.0278692	0.934705	AT4G30690.1	1.184	0.556315	0.833627	0.081998	AT4G30690.1	1.25399	0.234595	0.705577	0.200314	AT4G30690.1	0.816266	0.385785	0.817239	0.123556	AT4G30690.1	1.19037	0.167487	0.745213	0.263499	AT4G30690.1	1.18099	0.422911
plastid	AT5G05730.1;AT5G05730.2	| anthranilate synthase alpha subunit 1 | Chr5:1719740-1722811 REVERSE LENGTH=595 | 201606 [AT5G05730.1,AT5G05730.2]	5	5	4.919	66311.8	AT5G05730.1;AT5G05730.2	3.40629	0.00137483	0.00628284	0.998847	AT5G05730.1;AT5G05730.2	3.062	0.00144658	0.00521286	0.998628	AT5G05730.1;AT5G05730.2	1.81753	0.163182	0.300007	0.260633	AT5G05730.1;AT5G05730.2	1.68244	0.0873306	0.163951	0.41163	AT5G05730.1;AT5G05730.2	1.36111	0.596668	0.853919	0.075647	AT5G05730.1;AT5G05730.2	1.7589	0.171848	0.657616	0.259227	AT5G05730.1;AT5G05730.2	1.31442	0.52107	0.84985	0.0884223	AT5G05730.1;AT5G05730.2	1.11244	0.240844	0.780988	0.196398	AT5G05730.1;AT5G05730.2	1.87413	0.0336116
plastid	AT5G38660.1	| acclimation of photosynthesis to environment | Chr5:15473285-15475497 REVERSE LENGTH=286 | 201606	7	6	7.963	31438.3	AT5G38660.1	3.39769	0.061993	0.107123	0.497605	AT5G38660.1	3.87504	0.00308511	0.00917946	0.988038	AT5G38660.1	2.16621	0.073146	0.18366	0.452714	AT5G38660.1	1.46306	0.144152	0.241457	0.295869	AT5G38660.1	0.740969	0.48064	0.79743	0.096973	AT5G38660.1	0.769063	0.545838	0.880642	0.0838165	AT5G38660.1	0.535754	0.102014	0.742917	0.37418	AT5G38660.1	0.876815	0.460348	0.835913	0.102775	AT5G38660.1	1.5685	0.477692
plastid	AT4G18240.1	| starch synthase 4 | Chr4:10082221-10087044 FORWARD LENGTH=1040 | 201606	6	6	5.977	117751	AT4G18240.1	3.39665	5.30863e-06	0.000216968	1	AT4G18240.1	3.21358	0.00184023	0.00627777	0.997033	AT4G18240.1	3.55979	0.0361232	0.121575	0.646895	AT4G18240.1	2.37155	0.0140227	0.0431183	0.844203	AT4G18240.1	1.36246	0.218483	0.632119	0.213075	AT4G18240.1	1.04606	0.810008	0.961277	0.0551256	AT4G18240.1	0.81282	0.351333	0.810716	0.136274	AT4G18240.1	1.05697	0.620914	0.896813	0.0728014	AT4G18240.1	0.95417	0.802949
mitochondrion	AT1G11860.3	| Glycine cleavage T-protein family | Chr1:4001485-4003245 FORWARD LENGTH=423 | 201606	19	17	27.806	46353.3	AT1G11860.3	3.3962	0.000103961	0.001209	1	AT1G11860.3	3.51088	4.29972e-05	0.000506988	1	AT1G11860.3	2.95657	0.00105556	0.0212029	0.999966	AT1G11860.3	2.06806	0.000583722	0.00517709	0.999969	AT1G11860.3	1.19066	0.372936	0.741235	0.128066	AT1G11860.3	1.16814	0.135023	0.620343	0.310085	AT1G11860.3	0.96496	0.797281	0.936907	0.055858	AT1G11860.3	0.967336	0.596873	0.88624	0.0761969	AT1G11860.3	1.1487	0.19047
plastid	AT4G33760.1	| tRNA synthetase class II (D%2C K and N) family protein | Chr4:16189285-16193260 REVERSE LENGTH=664 | 201606	8	7	7.879	74519.2	AT4G33760.1	3.38316	0.000282967	0.00221577	1	AT4G33760.1	3.50944	0.00384393	0.010817	0.980304	AT4G33760.1	3.33197	0.00178392	0.025183	0.999478	AT4G33760.1	2.18374	0.000380718	0.00395546	0.999997	AT4G33760.1	1.28499	0.167761	0.591673	0.264107	AT4G33760.1	1.26407	0.101948	0.555902	0.374331	AT4G33760.1	1.2178	0.156793	0.763824	0.278055	AT4G33760.1	0.964015	0.999252	1	0.0500001	AT4G33760.1	1.01536	0.908321
cytosol	AT3G51780.1	| BCL-2-associated athanogene 4 | Chr3:19207029-19208178 REVERSE LENGTH=269 | 201606	2	2	2.957	29209.8	AT3G51780.1	3.37481	0.00319597	0.0112374	0.986995	AT3G51780.1	3.62165	0.000447256	0.00228447	0.999993	AT3G51780.1	1.75793	0.118273	0.246711	0.331636	AT3G51780.1	1.15104	0.272079	0.392256	0.175126	AT3G51780.1	1.02375	0.807839	0.937371	0.0552466	AT3G51780.1	0.987077	0.918795	0.986754	0.0509153	AT3G51780.1	0.971489	0.843905	0.953898	0.0534284	AT3G51780.1	0.931845	0.639674	0.899768	0.0703648	AT3G51780.1	1.91977	0.0651402
plastid	AT1G44446.1;AT1G44446.2	| Pheophorbide a oxygenase family protein with Rieske 2Fe-2S domain-containing protein | Chr1:16848664-16851152 REVERSE LENGTH=536 | 201606	8	8	7.765	60332	AT1G44446.1;AT1G44446.2	3.37218	0.000161963	0.00157492	1	AT1G44446.1;AT1G44446.2	2.55151	0.000470936	0.00236492	0.99999	AT1G44446.1;AT1G44446.2	2.92048	0.00130022	0.0224251	0.99989	AT1G44446.1;AT1G44446.2	2.12704	0.00196138	0.0114936	0.99641	AT1G44446.1;AT1G44446.2	1.07979	0.618179	0.858826	0.0726487	AT1G44446.1;AT1G44446.2	0.674387	0.15908	0.641624	0.275038	AT1G44446.1;AT1G44446.2	0.867752	0.409284	0.822372	0.115944	AT1G44446.1;AT1G44446.2	1.32164	0.0155725	0.494837	0.794316	AT1G44446.1;AT1G44446.2	1.15467	0.18474
plastid	AT2G29690.1;AT2G29690.2	| anthranilate synthase 2 | Chr2:12693899-12696791 FORWARD LENGTH=621 | 201606 [AT2G29690.1,AT2G29690.2]	3	3	2.989	69817.2	AT2G29690.1;AT2G29690.2	3.36733	0.000816085	0.00440812	0.999849	AT2G29690.1;AT2G29690.2	2.91098	4.44138e-05	0.000514292	1	AT2G29690.1;AT2G29690.2	2.7712	0.00507207	0.0408499	0.981285	AT2G29690.1;AT2G29690.2	2.24511	0.00232014	0.0128162	0.994221	AT2G29690.1;AT2G29690.2	1.40093	0.207581	0.625541	0.222519	AT2G29690.1;AT2G29690.2	0.951288	0.599412	0.895944	0.0752503	AT2G29690.1;AT2G29690.2	1.07367	0.859003	0.956892	0.0527876	AT2G29690.1;AT2G29690.2	1.15677	0.433691	0.824494	0.109842	AT2G29690.1;AT2G29690.2	1.21511	0.399423
plastid	AT1G05190.1	| Ribosomal protein L6 family | Chr1:1502515-1503738 REVERSE LENGTH=223 | 201606	12	11	13.916	24705.8	AT1G05190.1	3.36491	0.0146166	0.0344855	0.836751	AT1G05190.1	3.07836	0.0157484	0.032129	0.822885	AT1G05190.1	3.68276	0.00151852	0.0233145	0.999756	AT1G05190.1	2.20202	0.00565303	0.023003	0.957968	AT1G05190.1	1.39139	0.288771	0.683527	0.165551	AT1G05190.1	1.24559	0.21496	0.691595	0.21605	AT1G05190.1	0.838194	0.361504	0.81327	0.132307	AT1G05190.1	1.09308	0.818095	0.955353	0.0548089	AT1G05190.1	0.913692	0.576999
plastid	AT3G26900.1;AT3G26900.2;AT3G26900.3	| shikimate kinase like 1 | Chr3:9912314-9914424 REVERSE LENGTH=280 | 201606 [AT3G26900.1,AT3G26900.2,AT3G26900.3]	7	7	8.946	30475.4	AT3G26900.1;AT3G26900.2;AT3G26900.3	3.36458	0.00142296	0.00644515	0.998703	AT3G26900.1;AT3G26900.2;AT3G26900.3	3.5073	0.000850744	0.00358201	0.99982	AT3G26900.1;AT3G26900.2;AT3G26900.3	3.26976	0.0463013	0.140396	0.578256	AT3G26900.1;AT3G26900.2;AT3G26900.3	2.33644	0.00642426	0.025289	0.94753	AT3G26900.1;AT3G26900.2;AT3G26900.3	1.55128	0.0594038	0.42733	0.508521	AT3G26900.1;AT3G26900.2;AT3G26900.3	1.29028	0.169529	0.655106	0.261976	AT3G26900.1;AT3G26900.2;AT3G26900.3	0.937103	0.872646	0.961674	0.0522679	AT3G26900.1;AT3G26900.2;AT3G26900.3	0.959309	0.599616	0.886943	0.0757933	AT3G26900.1;AT3G26900.2;AT3G26900.3	1.029	0.70396
plastid	AT1G15140.1	| FAD/NAD(P)-binding oxidoreductase | Chr1:5210403-5212137 REVERSE LENGTH=295 | 201606	7	6	6.918	31924.4	AT1G15140.1	3.36028	2.98445e-05	0.000594784	1	AT1G15140.1	3.58905	3.47274e-07	3.20881e-05	1	AT1G15140.1	2.64082	0.044142	0.137205	0.591539	AT1G15140.1	2.53857	1.6884e-06	0.000238346	1	AT1G15140.1	1.39383	0.0251821	0.307114	0.723225	AT1G15140.1	1.37543	0.0101369	0.210255	0.895728	AT1G15140.1	1.0964	0.337097	0.806284	0.142157	AT1G15140.1	0.936258	0.337578	0.802699	0.1431	AT1G15140.1	1.27244	0.289313
mitochondrion	AT5G53070.1	| Ribosomal protein L9/RNase H1 | Chr5:21518837-21520167 FORWARD LENGTH=221 | 201606	3	3	2.862	25351.4	AT5G53070.1	3.35886	0.608536	0.685716	0.0739615	AT5G53070.1	2.92629	0.235626	0.304385	0.199541	AT5G53070.1	2.45066	0.241734	0.38547	0.186852	AT5G53070.1	0.981558	0.36313	0.483476	0.13169	AT5G53070.1	0.0639719	0.843719	0.948624	0.0534368	AT5G53070.1	0.755453	0.810108	0.961277	0.05512	AT5G53070.1	1.00777	0.771042	0.928252	0.0575396	AT5G53070.1	1.14782	0.603122	0.887735	0.0752836	AT5G53070.1	1.37059	0.557641
plastid	AT5G64580.1	| AAA-type ATPase family protein | Chr5:25817391-25821465 REVERSE LENGTH=855 | 201606	3	3	2.96	96858.2	AT5G64580.1	3.35005	0.00900224	0.0239651	0.911508	AT5G64580.1	3.30885	0.00594751	0.01503	0.954022	AT5G64580.1	2.73069	0.118679	0.246982	0.330834	AT5G64580.1	2.6374	0.0159697	0.04731	0.820225	AT5G64580.1	1.76891	0.322144	0.706777	0.148792	AT5G64580.1	1.70844	0.0743108	0.493012	0.451668	AT5G64580.1	1.22782	0.423572	0.827694	0.11168	AT5G64580.1	1.01245	0.985957	0.997232	0.050028	AT5G64580.1	1.22681	0.416681
mitochondrion,plastid	AT1G11870.1;AT1G11870.2;AT1G11870.4;AT1G11870.5	| Seryl-tRNA synthetase | Chr1:4003895-4006556 FORWARD LENGTH=512 | 201606 [AT1G11870.1,AT1G11870.2,AT1G11870.4,AT1G11870.5]	5	5	4.956	57183.2	AT1G11870.1;AT1G11870.2;AT1G11870.4;AT1G11870.5	3.31674	1.54264e-05	0.000393956	1	AT1G11870.1;AT1G11870.2;AT1G11870.4;AT1G11870.5	3.02172	3.65229e-06	0.000109828	1	AT1G11870.1;AT1G11870.2;AT1G11870.4;AT1G11870.5	2.94146	0.00469149	0.0393627	0.984694	AT1G11870.1;AT1G11870.2;AT1G11870.4;AT1G11870.5	2.21502	6.84352e-05	0.00145339	1	AT1G11870.1;AT1G11870.2;AT1G11870.4;AT1G11870.5	1.38648	0.0513878	0.4042	0.545753	AT1G11870.1;AT1G11870.2;AT1G11870.4;AT1G11870.5	1.23618	0.0464736	0.430199	0.571589	AT1G11870.1;AT1G11870.2;AT1G11870.4;AT1G11870.5	1.13589	0.12116	0.747071	0.334269	AT1G11870.1;AT1G11870.2;AT1G11870.4;AT1G11870.5	1.09763	0.146795	0.730531	0.290091	AT1G11870.1;AT1G11870.2;AT1G11870.4;AT1G11870.5	1.12758	0.397673
plastid	AT5G64940.1;AT5G64940.2	| ABC2 homolog 13 | Chr5:25949116-25953326 FORWARD LENGTH=761 | 201606 [AT5G64940.1,AT5G64940.2]	7	7	7.855	86026	AT5G64940.1;AT5G64940.2	3.30578	0.00698721	0.0199153	0.939745	AT5G64940.1;AT5G64940.2	2.33297	0.0327091	0.0580774	0.660436	AT5G64940.1;AT5G64940.2	1.71245	0.190689	0.331197	0.229639	AT5G64940.1;AT5G64940.2	1.74771	0.0764965	0.14855	0.444407	AT5G64940.1;AT5G64940.2	1.27793	0.578146	0.844051	0.0784385	AT5G64940.1;AT5G64940.2	1.30441	0.346084	0.76869	0.138397	AT5G64940.1;AT5G64940.2	1.04471	0.910258	0.970512	0.0511191	AT5G64940.1;AT5G64940.2	1.41698	0.0479757	0.605991	0.546422	AT5G64940.1;AT5G64940.2	1.93044	0.012513
mitochondrion,plastid	AT2G04842.1;AT2G04842.2	| threonyl-tRNA synthetase%2C putative / threonine-tRNA ligase | Chr2:1698466-1701271 REVERSE LENGTH=650 | 201606 [AT2G04842.1,AT2G04842.2]	12	11	11.814	74786.9	AT2G04842.1;AT2G04842.2	3.30466	0.00235181	0.00905448	0.994004	AT2G04842.1;AT2G04842.2	3.19196	0.00161109	0.00564562	0.998042	AT2G04842.1;AT2G04842.2	2.37835	0.028466	0.106401	0.71065	AT2G04842.1;AT2G04842.2	1.55773	0.0640828	0.130215	0.489144	AT2G04842.1;AT2G04842.2	0.954144	0.963503	0.987662	0.0501842	AT2G04842.1;AT2G04842.2	0.772044	0.4385	0.818453	0.107493	AT2G04842.1;AT2G04842.2	0.816043	0.538764	0.858829	0.0850868	AT2G04842.1;AT2G04842.2	1.03531	0.776581	0.940374	0.0573478	AT2G04842.1;AT2G04842.2	1.38948	0.073959
plastid	AT1G56050.1	| GTP-binding protein-like protein | Chr1:20963793-20966181 FORWARD LENGTH=421 | 201606	8	7	8.96	45628.8	AT1G56050.1	3.30099	0.000424427	0.0028662	0.999995	AT1G56050.1	3.22366	5.40747e-05	0.000573711	1	AT1G56050.1	2.72877	0.000850679	0.0190447	0.999991	AT1G56050.1	2.30096	0.000275984	0.00322425	1	AT1G56050.1	2.45224	0.269289	0.67019	0.176815	AT1G56050.1	1.20994	0.140237	0.624165	0.301815	AT1G56050.1	0.954484	0.694366	0.900445	0.0638861	AT1G56050.1	1.02399	0.919203	0.982843	0.0509301	AT1G56050.1	1.2097	0.207275
plastid	AT1G56190.1	| Phosphoglycerate kinase family protein | Chr1:21028403-21030454 FORWARD LENGTH=478 | 201606	23	9	26.781	49939.5	AT1G56190.1	3.29658	5.72429e-05	0.000853104	1	AT1G56190.1	3.10484	2.65001e-06	9.4272e-05	1	AT1G56190.1	2.07897	0.0496151	0.146595	0.559024	AT1G56190.1	1.61862	0.000429811	0.00429136	0.999994	AT1G56190.1	1.10548	0.468717	0.792019	0.099769	AT1G56190.1	0.942033	0.589364	0.894785	0.0767238	AT1G56190.1	0.990318	0.846867	0.954649	0.0532973	AT1G56190.1	1.06176	0.524164	0.855418	0.0886062	AT1G56190.1	1.58568	0.069259
plastid	AT5G46420.1	| 16S rRNA processing protein RimM family | Chr5:18829999-18832893 FORWARD LENGTH=653 | 201606	8	8	8.871	73785.3	AT5G46420.1	3.29587	0.00160372	0.00700785	0.998071	AT5G46420.1	3.35617	0.000122387	0.000974875	1	AT5G46420.1	3.43263	0.00185051	0.0255109	0.999385	AT5G46420.1	2.67529	0.000426929	0.00427098	0.999994	AT5G46420.1	1.2813	0.0992853	0.484695	0.380624	AT5G46420.1	1.50653	0.0169203	0.269558	0.808985	AT5G46420.1	1.14575	0.475945	0.839553	0.098058	AT5G46420.1	0.982033	0.791982	0.946013	0.0563374	AT5G46420.1	0.960157	0.799806
plastid	AT2G21370.1	| xylulose kinase-1 | Chr2:9137582-9140050 REVERSE LENGTH=478 | 201606	5	5	4.854	52469.5	AT2G21370.1	3.29201	9.49037e-05	0.00114409	1	AT2G21370.1	4.02438	0.000242282	0.00149973	1	AT2G21370.1	2.803	0.00012656	0.00869159	1	AT2G21370.1	1.67036	0.00106131	0.00761631	0.999554	AT2G21370.1	0.806475	0.140057	0.555201	0.302095	AT2G21370.1	1.34949	0.833689	0.964873	0.0539018	AT2G21370.1	1.7117	0.752172	0.92257	0.0588969	AT2G21370.1	0.818017	0.231516	0.7799	0.203227	AT2G21370.1	1.17446	0.182901
nucleus	AT4G32910.1	| nuclear pore complex Nup85-like protein | Chr4:15881364-15885210 FORWARD LENGTH=716 | 201606	3	3	3.955	80851.1	AT4G32910.1	3.27669	0.623343	0.698221	0.071966	AT4G32910.1	0.46647	0.167411	0.228092	0.264532	AT4G32910.1	0.466459	0.240384	0.384588	0.187801	AT4G32910.1	1.0103	0.843672	0.890455	0.0534389	AT4G32910.1	1.02733	0.923546	0.977278	0.0508109	AT4G32910.1	1.38043	0.315016	0.752309	0.152133	AT4G32910.1	1.15829	0.579122	0.871255	0.0782864	AT4G32910.1	7.02445	0.182913	0.755267	0.246366	AT4G32910.1	7.02461	0.258118
plastid	AT1G60990.1;AT1G60990.2;AT1G60990.3	| Glycine cleavage T-protein family | Chr1:22462771-22465416 REVERSE LENGTH=432 | 201606 [AT1G60990.1,AT1G60990.2,AT1G60990.3]	3	3	2.984	47009.7	AT1G60990.1;AT1G60990.2;AT1G60990.3	3.27598	0.00145213	0.00657006	0.99861	AT1G60990.1;AT1G60990.2;AT1G60990.3	3.2757	0.00152586	0.0053966	0.99836	AT1G60990.1;AT1G60990.2;AT1G60990.3	3.46601	0.00302005	0.031615	0.9959	AT1G60990.1;AT1G60990.2;AT1G60990.3	3.0231	0.00150045	0.00950781	0.998449	AT1G60990.1;AT1G60990.2;AT1G60990.3	1.54535	0.142805	0.556972	0.297891	AT1G60990.1;AT1G60990.2;AT1G60990.3	1.5718	0.0852647	0.5177	0.417502	AT1G60990.1;AT1G60990.2;AT1G60990.3	1.16747	0.346793	0.810498	0.138107	AT1G60990.1;AT1G60990.2;AT1G60990.3	1.00009	0.998251	0.999825	0.0500004	AT1G60990.1;AT1G60990.2;AT1G60990.3	0.945175	0.570306
plastid	AT3G59400.1	| protein GENOMES UNCOUPLED 4 | Chr3:21948881-21949678 REVERSE LENGTH=265 | 201606	4	3	3.95	29665.1	AT3G59400.1	3.25448	0.0360685	0.0690397	0.636076	AT3G59400.1	5.23168	0.0016375	0.00571942	0.997937	AT3G59400.1	7.54594	0.0131319	0.0683076	0.881564	AT3G59400.1	5.69295	0.00078273	0.00632406	0.999875	AT3G59400.1	2.76743	0.160359	0.586688	0.273376	AT3G59400.1	2.57659	0.61802	0.905092	0.07267	AT3G59400.1	2.32074	0.0278914	0.722876	0.699171	AT3G59400.1	0.622071	0.113701	0.709722	0.344526	AT3G59400.1	0.431289	0.131525
plastid	AT1G11750.1	| CLP protease proteolytic subunit 6 | Chr1:3967609-3969535 FORWARD LENGTH=271 | 201606	5	5	4.91	29382.7	AT1G11750.1	3.2433	0.00084232	0.00451548	0.999827	AT1G11750.1	2.88003	0.000489757	0.00243061	0.999988	AT1G11750.1	1.96249	0.0424564	0.134034	0.602352	AT1G11750.1	1.97483	0.00658589	0.0257817	0.945306	AT1G11750.1	1.31915	0.149056	0.565723	0.288717	AT1G11750.1	1.3988	0.0517134	0.450493	0.544128	AT1G11750.1	1.28436	0.102953	0.742917	0.372008	AT1G11750.1	1.12613	0.31148	0.796387	0.15495	AT1G11750.1	1.65264	0.0327869
plastid	AT5G26742.2	| DEAD box RNA helicase (RH3) | Chr5:9285540-9288871 REVERSE LENGTH=748 | 201606	19	17	18.828	81159.2	AT5G26742.2	3.2347	0.000419214	0.00284059	0.999995	AT5G26742.2	2.77849	3.6631e-05	0.000459652	1	AT5G26742.2	4.02491	2.11081e-05	0.00405256	1	AT5G26742.2	2.90632	0.000103698	0.00186743	1	AT5G26742.2	2.09062	0.0153736	0.262022	0.827428	AT5G26742.2	1.87553	1.4485e-05	0.0104088	1	AT5G26742.2	1.57766	0.00220704	0.44641	0.994965	AT5G26742.2	1.16419	0.331731	0.802699	0.145626	AT5G26742.2	0.803671	0.160727
plastid	AT1G69830.1	| alpha-amylase-like 3 | Chr1:26288518-26293003 REVERSE LENGTH=887 | 201606	11	8	10.776	99843.9	AT1G69830.1	3.23131	3.94887e-05	0.000687266	1	AT1G69830.1	2.61062	3.13075e-05	0.000417597	1	AT1G69830.1	1.61208	0.0572048	0.159239	0.519562	AT1G69830.1	1.1888	0.227816	0.341321	0.20552	AT1G69830.1	1.28623	0.0932894	0.477439	0.395578	AT1G69830.1	1.20221	0.397129	0.800559	0.119783	AT1G69830.1	1.02822	0.836754	0.950465	0.0537564	AT1G69830.1	1.23776	0.0341084	0.566104	0.627391	AT1G69830.1	2.00443	0.00596931
plastid	AT3G48870.2	| Clp ATPase | Chr3:18122363-18125915 REVERSE LENGTH=921 | 201606	34	8	36.779	102245	AT3G48870.2	3.22342	0.000201384	0.00177065	1	AT3G48870.2	3.01938	1.21463e-06	6.05173e-05	1	AT3G48870.2	3.49027	0.000263723	0.011358	1	AT3G48870.2	2.42709	2.48239e-05	0.000852398	1	AT3G48870.2	1.72455	0.0125011	0.23443	0.863829	AT3G48870.2	1.58048	0.00202277	0.100639	0.996071	AT3G48870.2	1.23209	0.0762765	0.742917	0.445127	AT3G48870.2	1.06758	0.604423	0.887979	0.0750962	AT3G48870.2	0.923543	0.563958
plastid	AT4G29590.1	| S-adenosyl-L-methionine-dependent methyltransferases superfamily protein | Chr4:14512736-14514404 REVERSE LENGTH=317 | 201606	6	6	5.981	35374.1	AT4G29590.1	3.21728	0.00199433	0.00808238	0.99623	AT4G29590.1	3.32887	0.00211988	0.00697747	0.995505	AT4G29590.1	2.68595	0.0251479	0.0983899	0.742352	AT4G29590.1	2.53415	0.00449021	0.0196887	0.972812	AT4G29590.1	1.36667	0.262792	0.665095	0.180855	AT4G29590.1	1.30355	0.147751	0.63122	0.290589	AT4G29590.1	0.929202	0.832562	0.949887	0.053956	AT4G29590.1	0.966481	0.83639	0.962123	0.0538718	AT4G29590.1	1.19782	0.350432
plastid	AT1G62640.1;AT1G62640.2	| 3-ketoacyl-acyl carrier protein synthase III | Chr1:23192502-23194737 FORWARD LENGTH=404 | 201606 [AT1G62640.1,AT1G62640.2]	6	6	6.926	42846.7	AT1G62640.1;AT1G62640.2	3.20697	0.421028	0.510693	0.11242	AT1G62640.1;AT1G62640.2	0.923237	0.982863	0.986357	0.0500406	AT1G62640.1;AT1G62640.2	3.3082	0.224311	0.366779	0.199766	AT1G62640.1;AT1G62640.2	1.325	0.349318	0.470261	0.137082	AT1G62640.1;AT1G62640.2	4.00329	0.131189	0.544249	0.316439	AT1G62640.1;AT1G62640.2	5.88755	0.174062	0.657616	0.256649	AT1G62640.1;AT1G62640.2	4.49463	0.181956	0.763824	0.247819	AT1G62640.1;AT1G62640.2	3.47361	0.327713	0.802686	0.147404	AT1G62640.1;AT1G62640.2	0.969399	0.814028
cytosol	AT2G41090.1	| Calcium-binding EF-hand family protein | Chr2:17135823-17136618 FORWARD LENGTH=191 | 201606	2	2	1.994	21728.5	AT2G41090.1	3.20289	0.00681446	0.0195325	0.942144	AT2G41090.1	1.98056	0.0401075	0.0688393	0.609251	AT2G41090.1	1.0741	0.98114	0.989199	0.0500449	AT2G41090.1	0.875138	0.8306	0.88197	0.0540514	AT2G41090.1	0.522064	0.186755	0.606836	0.242708	AT2G41090.1	0.9666	0.707854	0.930924	0.0626041	AT2G41090.1	0.981901	0.997061	0.998829	0.0500012	AT2G41090.1	1.61716	0.0016037	0.303032	0.993692	AT2G41090.1	2.98192	0.0192734
nucleus	AT1G15290.1	| Tetratricopeptide repeat (TPR)-like superfamily protein | Chr1:5257327-5264814 REVERSE LENGTH=1608 | 201606	5	3	4.946	177637	AT1G15290.1	3.2008	0.00763231	0.0211914	0.93073	AT1G15290.1	2.82046	0.00228092	0.00737851	0.994484	AT1G15290.1	4.27301	0.00348733	0.0347516	0.993464	AT1G15290.1	4.34644	0.000437882	0.00432941	0.999993	AT1G15290.1	3.14477	0.00212965	0.110993	0.995445	AT1G15290.1	2.52007	0.00430514	0.139949	0.975027	AT1G15290.1	1.7498	0.0532189	0.742917	0.536749	AT1G15290.1	1.13485	0.648278	0.900251	0.0693064	AT1G15290.1	0.749073	0.201368
cytosol	AT4G14040.1	| selenium-binding protein 2 | Chr4:8100691-8102828 REVERSE LENGTH=487 | 201606	10	5	9.935	53939.3	AT4G14040.1	3.19142	3.9105e-06	0.000191088	1	AT4G14040.1	2.04214	3.87972e-05	0.000472824	1	AT4G14040.1	1.78729	0.0584308	0.161121	0.513716	AT4G14040.1	1.67186	0.000695436	0.0057843	0.999927	AT4G14040.1	1.22946	0.247825	0.65368	0.190769	AT4G14040.1	1.136	0.071167	0.491793	0.462546	AT4G14040.1	1.05091	0.662559	0.892068	0.0672161	AT4G14040.1	1.56278	1.82472e-05	0.0434214	1	AT4G14040.1	1.78562	0.0155887
	AT1G62850.2;AT1G62850.3;AT1G62850.4	| Class I peptide chain release factor | Chr1:23272608-23274211 REVERSE LENGTH=236 | 201606 [AT1G62850.2,AT1G62850.3,AT1G62850.4]	2	2	2.988	26072.9	AT1G62850.2;AT1G62850.3;AT1G62850.4	3.18792	0.0242704	0.0510945	0.731729	AT1G62850.2;AT1G62850.3;AT1G62850.4	2.5494	0.0516751	0.0853192	0.544319	AT1G62850.2;AT1G62850.3;AT1G62850.4	3.03858	0.094968	0.214066	0.38497	AT1G62850.2;AT1G62850.3;AT1G62850.4	2.72293	0.0308671	0.076346	0.67468	AT1G62850.2;AT1G62850.3;AT1G62850.4	2.5565	0.0397638	0.372841	0.611438	AT1G62850.2;AT1G62850.3;AT1G62850.4	1.98124	0.0998356	0.547898	0.379307	AT1G62850.2;AT1G62850.3;AT1G62850.4	1.34806	0.318004	0.802443	0.150718	AT1G62850.2;AT1G62850.3;AT1G62850.4	1.25046	0.234339	0.7799	0.20112	AT1G62850.2;AT1G62850.3;AT1G62850.4	1.04915	0.671277
plasma membrane	AT4G01070.1	| UDP-Glycosyltransferase superfamily protein | Chr4:461858-463300 REVERSE LENGTH=480 | 201606	2	1	1.976	52930.5	AT4G01070.1	3.18485	0.0056239	0.0169719	0.958355	AT4G01070.1	2.15327	0.000989744	0.00403682	0.999662	AT4G01070.1	1.63753	0.334268	0.482052	0.137102	AT4G01070.1	0.877201	0.26038	0.37883	0.182394	AT4G01070.1	0.936769	0.657304	0.878827	0.0678098	AT4G01070.1	0.98377	0.847938	0.965986	0.0532505	AT4G01070.1	1.4223	0.475268	0.839525	0.0982161	AT4G01070.1	1.47908	0.144083	0.730531	0.293939	AT4G01070.1	1.94492	0.108551
plastid	AT1G01080.2	| RNA-binding (RRM/RBD/RNP motifs) family protein | Chr1:45503-46789 REVERSE LENGTH=294 | 201606	7	5	6.913	32675.1	AT1G01080.2	3.18424	0.000405238	0.00279433	0.999996	AT1G01080.2	3.38985	9.23107e-05	0.000818714	1	AT1G01080.2	2.21154	0.18923	0.329367	0.231113	AT1G01080.2	2.04814	0.00134302	0.00888705	0.998937	AT1G01080.2	1.41253	0.0746396	0.45733	0.450561	AT1G01080.2	1.3322	0.0775172	0.500818	0.441097	AT1G01080.2	0.85407	0.353517	0.810716	0.135406	AT1G01080.2	0.939348	0.415457	0.818713	0.115139	AT1G01080.2	1.43983	0.218783
plastid	AT4G33510.1	| 3-deoxy-d-arabino-heptulosonate 7-phosphate synthase | Chr4:16116496-16118549 FORWARD LENGTH=507 | 201606	9	5	8.954	56150	AT4G33510.1	3.174	2.78409e-06	0.000160781	1	AT4G33510.1	3.14674	2.39135e-06	8.87068e-05	1	AT4G33510.1	2.52267	0.000174354	0.00973703	1	AT4G33510.1	1.89535	0.000163364	0.00240303	1	AT4G33510.1	1.3892	0.00753627	0.20052	0.932076	AT4G33510.1	1.12639	0.187315	0.667678	0.242125	AT4G33510.1	1.07567	0.477654	0.841059	0.0976608	AT4G33510.1	1.00866	0.820967	0.956947	0.0546546	AT4G33510.1	1.25819	0.00700512
plastid	AT2G21170.1;AT2G21170.3	| triosephosphate isomerase | Chr2:9071047-9073106 REVERSE LENGTH=315 | 201606 [AT2G21170.1,AT2G21170.3]	13	11	16.869	33345.4	AT2G21170.1;AT2G21170.3	3.17255	0.000189367	0.00171205	1	AT2G21170.1;AT2G21170.3	2.78758	9.7839e-06	0.000198383	1	AT2G21170.1;AT2G21170.3	2.34568	0.0002255	0.0108951	1	AT2G21170.1;AT2G21170.3	1.79522	6.3434e-05	0.00140117	1	AT2G21170.1;AT2G21170.3	1.17035	0.291586	0.686355	0.164021	AT2G21170.1;AT2G21170.3	1.16707	0.237423	0.708108	0.198206	AT2G21170.1;AT2G21170.3	0.953683	0.515072	0.84927	0.0896063	AT2G21170.1;AT2G21170.3	1.1381	0.254944	0.782224	0.186774	AT2G21170.1;AT2G21170.3	1.35251	0.0468979
plastid	AT3G53900.1;AT3G53900.2	| uracil phosphoribosyltransferase | Chr3:19956914-19958699 REVERSE LENGTH=231 | 201606 [AT3G53900.1,AT3G53900.2]	10	10	12.82	25162	AT3G53900.1;AT3G53900.2	3.16476	2.20504e-05	0.000493702	1	AT3G53900.1;AT3G53900.2	3.10375	7.98498e-05	0.000740505	1	AT3G53900.1;AT3G53900.2	3.199	0.000237969	0.0108951	1	AT3G53900.1;AT3G53900.2	2.17626	8.13544e-05	0.00162141	1	AT3G53900.1;AT3G53900.2	1.18408	0.415553	0.766674	0.114041	AT3G53900.1;AT3G53900.2	1.43888	0.00312322	0.121667	0.987683	AT3G53900.1;AT3G53900.2	1.14659	0.124191	0.747071	0.328685	AT3G53900.1;AT3G53900.2	1.01966	0.762946	0.939309	0.058312	AT3G53900.1;AT3G53900.2	0.989298	0.890181
[truncated: 4,450 more rows]
[truncated: 97 more columns]

## Sheet: cp proteins
								FC > 8
								FC between 4 and 8
								FC between 2 and 4
								FC between 0.5 and 2
								FC between 0.5 and 0.25
								FC between 0.25 and 0.125
								FC < 0.125
[truncated: 1,125 more rows]
[truncated: 97 more columns]

## Sheet: Normalization factors
	Max/min:
[truncated: 34 more rows]
