# Supplementary material for: A multifaceted analysis reveals two distinct phases of chloroplast biogenesis during de-etiolation in Arabidopsis
Source: eLife. 2021 Feb 25;10:e62709. doi: 10.7554/eLife.62709 (PMC7906606; doi:10.7554/eLife.62709)
Supplement: Figure 6—source data 1. [file elife-62709-fig6-data1.xlsx]

## Sheet: Foglio1
time points	raw data								ng PetC	raw data										sample list
	bio1	ng PsaC	tot PsaC	ng/seedling	nmol/seedling	surface nm2	surface in um2		3	3.81804e+06										BIO1	mg FW	ul SB4V		BIO2	mg FW	ul SB4V		BIO3	mg FW	ul SB4V		BIO4	mg FW	ul SB4V
0	278592	-0.729225	-27.3605	-0.273605	-3.04006e-05	-5.49308e+12	-5.49308e+06		1.5	2.91849e+06										T0.1	46.9	187.6		T0.2	49.7	198.8		T0.3	50.6	202.4		T0.4	46	184
4	487439	-0.518115	-19.4811	-0.194811	-2.16457e-05	-3.91116e+12	-3.91116e+06		0.75	1.64465e+06										T4.1	47	188		T4.2	48.4	193.6		T4.3	40.8	163.2		T4.4	41.1	164.4
8	564049	-0.440676	-14.8067	-0.148067	-1.64519e-05	-2.97269e+12	-2.97269e+06		0.325	1.19819e+06										T8.1	42	168		T8.2	36.5	146		T8.3	50.5	202		T8.4	45.2	180.8
12	1.1198e+06	0.121103	3.14867	0.0314867	3.49852e-06	6.32148e+11	632148													T12.1	32.5	130		T12.2	36.6	146.4		T12.3	42	168		T12.4	41.3	165.2
24	2.95635e+06	1.97755	77.0453	0.770453	8.56059e-05	1.54681e+13	1.54681e+07		intercept	1000000										T24.1	48.7	194.8		T24.2	50.4	201.6		T24.3	46.6	186.4		T24.4	48.2	192.8
48	4.10544e+06	3.1391	153.69	1.5369	0.000170767	3.08558e+13	3.08558e+07		slope	989280										T48.1	61.2	244.8		T48.2	53.3	213.2		T48.3	46.3	185.2		T48.4	50.3	201.2
72	4449015	3.48639	172.088	1.72088	0.000191209	3.45496e+13	3.45496e+07													T72.1	61.7	246.8		T72.2	60.9	243.6		T72.3	54.8	219.2		T72.4	57.2	228.8
96	5.31509e+06	4.36185	259.966	2.59966	0.000288851	5.21925e+13	5.21925e+07													T96.1	74.5	298		T96.2	63.7	254.8		T96.3	65.2	260.8		T96.4	63.3	253.2
T72/3	2.89816e+06	5.75618	284.125	2.84125	0.000315694	5.70428e+13	5.70428e+07
T96/4	2.20412e+06	4.86867	290.173	2.90173	0.000322414	5.8257e+13	5.8257e+07											loading volume	5
																		nb seedling	100
	bio2	ng PsaC	tot PsaC	ng/seedling	nmol/seedling	surface nm2	surface in um2		ng PsaC	raw data								Da PetC	9000
0	93556.7	-0.2738	-10.8863	-0.108863	-1.20959e-05	-2.1856e+12	-2.1856e+06		3	5.10617e+06								avogradro constant	602300000000000
4	163191	-0.238983	-9.25343	-0.0925343	-1.02816e-05	-1.85778e+12	-1.85778e+06		1.5	3.52389e+06								surface	300
8	475572	-0.0827925	-2.41754	-0.0241754	-2.68616e-06	-485361648100	-485362		0.75	1.89702e+06
12	858390	0.108616	3.18028	0.0318028	3.53365e-06	6.38495e+11	638495		0.325	789221
24*	473916	-0.167241	-6.74317	-0.0674317	-7.49241e-06	-1.3538e+12	-1.3538e+06
48	2.10805e+06	0.733447	31.2742	0.312742	3.47491e-05	6.27881e+12	6.27881e+06		intercept	641157
72	5.07368e+06	2.21626	107.976	1.07976	0.000119974	2.1678e+13	2.1678e+07		slope	2000000
96	4.67237e+06	2.01561	102.715	1.02715	0.000114128	2.06218e+13	2.06218e+07
T72/3	1.04861e+06	0.611187	29.777	0.29777	3.30856e-05	5.97823e+12	5.97823e+06
T96/4	1.32217e+06	1.36203	69.4089	0.694089	7.7121e-05	1.3935e+13	1.3935e+07
	bio3	ng PsaC	tot PsaC	ng/seedling	nmol/seedling	surface nm2	surface in um2		ng PsaC	raw data											surface			nmol/seedling
0	88926.5	-0.632841	-25.6174	-0.256174	-2.84638e-05	-5.14312e+12	-5.14312e+06		3	3019429											mean	sd		mean	sd
4	328878	-0.340616	-11.1177	-0.111177	-1.2353e-05	-2.23207e+12	-2.23207e+06		1.5	2.01654e+06										T0	-4.27394e+06	1.81699e+06		-1.18715e-05	1.00559e-05
8	400483	-0.253412	-10.2378	-0.102378	-1.13754e-05	-2.05542e+12	-2.05542e+06		0.75	1.06739e+06										T4	-2.667e+06	1.09361e+06		-3.80647e-06	6.05238e-06
12	780614	0.209531	7.04024	0.0704024	7.82248e-06	1.41344e+12	1.41344e+06		0.325	908640										T8	-1.83782e+06	1.25786e+06		3.04254e-07	6.96143e-06
24	1.52009e+06	1.1101	41.3845	0.413845	4.59827e-05	8.30862e+12	8.30862e+06													T12	894696	449261		1.61668e-05	2.48636e-06
48	3.46525e+06	3.47902	128.863	1.28863	0.000143181	2.58714e+13	2.58714e+07		intercept	608564										T24	1.32738e+07	4.30959e+06		7.34616e-05	2.38508e-05
72	3.87061e+06	3.97268	174.162	1.74162	0.000193514	3.4966e+13	3.4966e+07		slope	821119										T48	2.1002e+07	1.29919e+07		0.000116232	7.19019e-05
96	4.87186e+06	5.19205	270.818	2.70818	0.000300908	5.43711e+13	5.43711e+07													T72	3.03979e+07	7.55448e+06		0.000168232	4.18091e-05
T72/3	1.00339e+06	1.4425	63.2393	0.632393	7.02659e-05	1.26964e+13	1.26964e+07													T96	4.23952e+07	1.88877e+07		0.000234629	0.000104531
T96/4	917067	1.50284	78.3882	0.783882	8.7098e-05	1.57377e+13	1.57377e+07													T72/3	2.52391e+07	2.77469e+07		0.000139682	0.000153561
																				T96/4	2.93099e+07	2.50851e+07		0.000162211	0.000138829
	bio4	ng PsaC	tot PsaC	ng/seedling	nmol/seedling	surface nm2	surface in um2		ng PsaC	raw data
0	581249	0.587305	21.6128	0.216128	2.40143e-05	4.33913e+12	4.33913e+06		2.1	2.81193e+06
4	322103	0.32816	10.7899	0.107899	1.19888e-05	2.16625e+12	2.16625e+06		0.75	787792
8	607101	0.613158	22.1718	0.221718	2.46353e-05	4.45135e+12	4.45135e+06		0.325	571743
12	1.74008e+06	1.74614	57.6923	0.576923	6.41026e-05	1.15827e+13	1.15827e+07
24	2.06647e+06	2.07252	79.9165	0.799165	8.87961e-05	1.60446e+13	1.60446e+07		1.5	1.36497e+06
48	3.31031e+06	3.31636	133.45	1.3345	0.000148278	2.67924e+13	2.67924e+07
72	2.60362e+06	2.60967	119.419	1.19419	0.000132687	2.39753e+13	2.39753e+07		intercept	1000000
96	4.39551e+06	4.40157	222.895	2.22895	0.000247662	4.475e+13	4.475e+07		slope	-6056.3
																		loading volume	5
	bio1	ng PsbA	tot PsbA	ng/seedling	nmol/seedling	surface nm2	surface in um2		ng PsbA	raw data								nb seedling	100
0	44944.1	0.500833	18.7913	0.187913	4.94507e-06	1.47134e+12	1.47134e+06		10	7.08591e+06								Da PsbA	38000
4	526735	1.13345	42.6178	0.426178	1.12152e-05	3.33693e+12	3.33693e+06		5	4.01454e+06								avogradro constant	602300000000000
8	953274	1.69352	56.9023	0.569023	1.49743e-05	4.45539e+12	4.45539e+06		2.5	1.29228e+06								surface	494
12	3.798e+06	5.4288	141.149	1.41149	3.71444e-05	1.10518e+13	1.10518e+07		1.25	541034
24	7.11443e+06	9.78346	381.163	3.81163	0.000100306	2.98447e+13	2.98447e+07
48	9.53493e+06	12.9617	634.605	6.34605	0.000167001	4.96889e+13	4.96889e+07		intercept	-336482											surface	sd		nmol/seedling
752	1.32701e+07	17.8662	881.875	8.81875	0.000232072	6.90499e+13	6.90499e+07		slope	761583										0	2.04003e+06	537965		6.85641e-06	1.80807e-06
96	1.58878e+07	21.3033	1269.68	12.6968	0.000334126	9.94146e+13	9.94146e+07													4	2.73589e+06	530287		9.19515e-06	1.78226e-06
24/2,	4.01736e+06	11.4337	445.456	4.45456	0.000117225	3.48787e+13	3.48787e+07													8	4.40194e+06	212172		1.47946e-05	7.13097e-07
48/2	6080431	16.8515	825.05	8.2505	0.000217118	6.46006e+13	6.46006e+07													12	9.91297e+06	1.28863e+06		3.33168e-05	4.331e-06
72/3	7.01012e+06	28.9395	1428.45	14.2845	0.000375909	1.11846e+14	1.11846e+08													24	2.55118e+07	5.27426e+06		8.57435e-05	1.77265e-05
96/4	7.41581e+06	40.7167	2426.72	24.2672	0.00063861	1.9001e+14	1.9001e+08													48	5.31743e+07	1.85148e+07		0.000178715	6.2227e-05
96/8	4.48034e+06	50.598	3015.64	30.1564	0.000793589	2.36122e+14	2.36122e+08													72	8.50838e+07	1.61391e+07		0.000285961	5.42425e-05
																				96	1.12291e+08	2.26129e+07		0.000377403	7.60004e-05
	bio2	ng PsbA	tot PsbA	ng/seedling	nmol/seedling	surface nm2	surface in um2		ng PsbA	raw data										24 /2,	2.75403e+07	6.41814e+06		9.25611e-05	2.1571e-05
0	8632.85	-1.00226	-39.8499	-0.398499	-1.04868e-05	-3.12021e+12	-3.12021e+06		10	4.90568e+06										48/2	6.05971e+07	1.84933e+07		0.000203663	6.21548e-05
4	140124	-0.709716	-27.4802	-0.274802	-7.23163e-06	-2.15167e+12	-2.15167e+06		5	4.00065e+06										72/3	1.14756e+08	1.18941e+07		0.000385689	3.99753e-05
8	410095	-0.10908	-3.18513	-0.0318513	-8.38193e-07	-2.49393e+11	-249393		2.5	1.92018e+06										96/4	1.64848e+08	4.1066e+07		0.000554044	0.00013802
12	2.04928e+06	3.53781	103.587	1.03587	2.72598e-05	8.11076e+12	8.11076e+06		1.25	731796										96/8	1.83e+08	5.16687e+07		0.000615051	0.000173655
24	2.60463e+06	4.77336	192.462	1.92462	5.06479e-05	1.50696e+13	1.50696e+07
48	5156968	10.4518	445.667	4.45667	0.000117281	3.48953e+13	3.48953e+07																	3.70445e+11
72	1.1438e+07	24.426	1190.04	11.9004	0.000313167	9.31786e+13	9.31786e+07		slope	449475														2.22267e+12
96	1.62155e+07	35.0551	1786.41	17.8641	0.000470108	1.39874e+14	1.39874e+08		intercept	459124														2.22267e+06
24 /2,	1.3286e+06	3.86885	155.992	1.55992	4.10505e-05	1.2214e+13	1.2214e+07																	1.48178e+06
48/2	3.09219e+06	11.7162	499.578	4.99578	0.000131468	3.91164e+13	3.91164e+07
72/3	5.64539e+06	34.6155	1686.47	16.8647	0.000443807	1.32049e+14	1.32049e+08
96/4	5.48766e+06	44.7503	2280.48	22.8048	0.000600126	1.78559e+14	1.78559e+08
96/8	2675435	39.4471	2010.22	20.1022	0.000529006	1.57399e+14	1.57399e+08
	bio3	ng PsbA	tot PsbA	ng/seedling	nmol/seedling	surface nm2	surface in um2		ng PsbA	raw data
0	39951	0.801636	32.4502	0.324502	8.53953e-06	2.54082e+12	2.54082e+06		ng	value
4	115435	0.992575	32.3976	0.323976	8.5257e-06	2.5367e+12	2.5367e+06		8.3	3.09109e+06
8	295707	1.44858	58.5227	0.585227	1.54007e-05	4.58227e+12	4.58227e+06		4.15	1.13895e+06
12	1.00244e+06	3.23629	108.739	1.08739	2.86156e-05	8.51418e+12	8.51418e+06		2.075	609664
24	3.38675e+06	9.26751	345.493	3.45493	9.09191e-05	2.70517e+13	2.70517e+07		1.0375	204551
48	9698817	25.2342	934.674	9.34674	0.000245967	7.3184e+13	7.3184e+07
72	1.13925e+07	29.5185	1294.09	12.9409	0.000340551	1.01326e+14	1.01326e+08		slope	395328
96	1.31199e+07	33.8881	1767.6	17.676	0.000465158	1.38401e+14	1.38401e+08		intercept	-276958
24 /2,	1.40018e+06	8.48481	316.314	3.16314	8.32404e-05	2.4767e+13	2.4767e+07
48/2	4.9547e+06	26.4674	980.353	9.80353	0.000257988	7.67607e+13	7.67607e+07
72/3	4.63055e+06	37.2413	1632.66	16.3266	0.000429647	1.27835e+14	1.27835e+08
96/4	4.25014e+06	45.806	2389.24	23.8924	0.000628748	1.87075e+14	1.87075e+08
96/8	1.9005e+06	44.0638	2298.37	22.9837	0.000604834	1.7996e+14	1.7996e+08
	bio4	ng PsbA	tot PsbA	ng/seedling	nmol/seedling	surface nm2	surface in um2		recombinant prot
0	13321.6	0.731566	26.9216	0.269216	7.08464e-06	2.10794e+12	2.10794e+06		ng Psba	raw data
4	100154	0.906608	29.8093	0.298093	7.84454e-06	2.33404e+12	2.33404e+06		10	4635159
8	380713	1.47217	53.2338	0.532338	1.40089e-05	4.16815e+12	4.16815e+06		2.5	722119
12	1.60112e+06	3.93232	129.924	1.29924	3.41905e-05	1.01729e+13	1.01729e+07		1.25	414898
24	2.87717e+06	6.50467	250.82	2.5082	6.60053e-05	1.9639e+13	1.9639e+07
48	5.42072e+06	11.6321	468.075	4.68075	0.000123178	3.66498e+13	3.66498e+07		5	1.41392e+06
72	1.14015e+07	23.6886	1083.99	10.8399	0.00028526	8.48752e+13	8.48752e+07
96	12043469	24.9826	1265.12	12.6512	0.000332926	9.90574e+13	9.90574e+07		slope	496068
24 /2,	1.53786e+06	7.60962	293.427	2.93427	7.72176e-05	2.2975e+13	2.2975e+07		intercept	-349585
48/2	2833147	12.8318	516.353	5.16353	0.000135882	4.04299e+13	4.04299e+07
72/3	4.47719e+06	29.1902	1335.74	13.3574	0.000351511	1.04587e+14	1.04587e+08
96/4	3.32424e+06	29.6236	1500.14	15.0014	0.000394773	117459388788257	1.17459e+08
96/8	1.72909e+06	33.5224	1697.57	16.9757	0.00044673	1.32918e+14	1.32918e+08
	bio 1	ng PetC	tot PetC	ng/seedling	nmol/seedling	surface nm2	surface in um2		ng Psba	raw data								loading volume	5
0	24602.1	1.52338	57.157	0.57157	2.72176e-05	8.11463e+11	811463		10	663917								nb seedling	100
4	30971.4	1.61258	60.6329	0.606329	2.88728e-05	8.60809e+11	860809		5	207377								Da PetC	21000
8	26332.6	1.54761	51.9997	0.519997	2.47618e-05	7.38244e+11	738244		2.5	52406.1								avogradro constant	602300000000000		surface			nmol/seedling
12	145787	3.22055	83.7343	0.837343	3.98735e-05	1.18878e+12	1.18878e+06		1.25	78435.3								surface	49.5		mean	sd		mean	sd
24	430090	7.20216	280.596	2.80596	0.000133617	3.98364e+12	3.98364e+06													0	798645	232979		2.67877e-05	7.81445e-06
48	1.03508e+06	15.6749	767.442	7.67442	0.000365448	1.08954e+13	1.08954e+07													4	843239	291098		2.82835e-05	9.76384e-06
72	2.45506e+06	35.5615	1755.32	17.5532	0.000835865	2.49203e+13	2.49203e+07													8	749515	132906		2.51398e-05	4.45787e-06
96	4.22353e+06	60.3286	3595.59	35.9559	0.00171218	5.10468e+13	5.10468e+07													12	1.5711e+06	670729		5.26968e-05	2.24972e-05
24_/2	108381	5.39336	210.125	2.10125	0.00010006	2.98316e+12	2.98316e+06		slope	71404										24	3.58934e+06	1.13308e+06		0.000120392	3.80051e-05
48/2	244817	9.21489	451.161	4.51161	0.000214839	6.40516e+12	6.40516e+06		intercept	-84173										48	7.99732e+06	3.00843e+06		0.000268242	0.000100907
72/3	418516	21.1202	1042.49	10.4249	0.000496426	1.48004e+13	1.48004e+07													72	2.9619e+07	9.39405e+06		0.000993465	0.00031509
96/4	318413	22.5526	1344.13	13.4413	0.000640063	1.90827e+13	1.90827e+07													96	4.38011e+07	2.30366e+07		0.00146915	0.000772683
96/8	155436	26.8454	1599.99	15.9999	0.000761898	2.27151e+13	2.27151e+07													24_/2	3.44253e+06	1.22271e+06		0.000115468	4.10114e-05
																				48/2	5.3006e+06	1.01456e+06		0.00017779	3.40297e-05
	bio 2	ng PetC	tot PetC	ng/seedling	nmol/seedling	surface nm2	surface in um2		ng PetC	raw data										72/3	1.68729e+07	5.4796e+06		0.000565943	0.000183794
0	2388.5	1.81576	72.1945	0.721945	3.43783e-05	1.02495e+12	1.02495e+06		10	432169										96/4	2.37016e+07	1.10504e+07		0.000794985	0.000370645
4	13816.3	2.04681	79.2525	0.792525	3.77393e-05	1.12515e+12	1.12515e+06		5	104405										96/8	1.80378e+07	6.31183e+06		0.000605014	0.000211708
8	18491	2.14133	62.5268	0.625268	2.97747e-05	8.87698e+11	887698		2.5	27687.3
12	191659	5.64258	165.215	1.65215	7.86737e-05	2.34556e+12	2.34556e+06		1.25	13429
24	299025	7.81337	315.035	3.15035	0.000150017	4.47258e+12	4.47258e+06
48	583106	13.5572	578.077	5.78077	0.000275275	8.207e+12	8.207e+06		slope	49459
72	2.80393e+06	58.4595	2848.15	28.4815	0.00135626	4.04353e+13	4.04353e+07		intercept	-87417
96	4.17456e+06	86.1719	4391.32	43.9132	0.0020911	6.23439e+13	6.23439e+07
24_/2	121176	8.43497	340.098	3.40098	0.000161951	4.82839e+12	4.82839e+06
48/2	120365	8.40219	358.27	3.5827	0.000170605	5.08638e+12	5.08638e+06
72/3	462853	33.3774	1626.15	16.2615	0.000774355	2.30865e+13	2.30865e+07
96/4	533176	50.1905	2557.71	25.5771	0.00121796	3.6312e+13	3.6312e+07
96/8	88101.1	28.3901	1446.76	14.4676	0.000688932	2.05397e+13	2.05397e+07
	bio 4	ng PetC	tot PetC	ng/seedling	nmol/seedling	surface nm2	surface in um2		ng PetC	raw data
0	8570.27	1.07095	39.4111	0.394111	1.87672e-05	5.59522e+11	559522		10	1108924
4	20112.6	1.16486	38.3005	0.383005	1.82383e-05	5.43754e+11	543754		2.5	164474
8	26004	1.21279	43.8543	0.438543	2.0883e-05	6.22603e+11	622603		1.25	47507.4
12	185865	2.51335	83.041	0.83041	3.95433e-05	1.17894e+12	1.17894e+06
24	395999	4.22291	162.835	1.62835	7.75407e-05	2.31179e+12	2.31179e+06		5	335441
48	928948	8.55875	344.404	3.44404	0.000164002	4.88953e+12	4.88953e+06
72	4.32345e+06	36.1749	1655.37	16.5537	0.000788269	2.35013e+13	2.35013e+07		slope	122917
96	2.95657e+06	25.0546	1268.76	12.6876	0.000604173	1.80127e+13	1.80127e+07		intercept	-123068
24_/2	159396	4.59602	177.222	1.77222	8.43916e-05	2.51604e+12	2.51604e+06
48/2	351381	7.71983	310.646	3.10646	0.000147927	4.41026e+12	4.41026e+06
72/3	679902	19.5979	896.799	8.96799	0.000427047	1.27319e+13	1.27319e+07
96/4	548416	21.8516	1106.57	11.0657	0.000526937	1.571e+13	1.571e+07
96/8	108993	15.1036	764.845	7.64845	0.000364212	1.08586e+13	1.08586e+07
