# Supplementary material for: A multifaceted analysis reveals two distinct phases of chloroplast biogenesis during de-etiolation in Arabidopsis
Source: eLife. 2021 Feb 25;10:e62709. doi: 10.7554/eLife.62709 (PMC7906606; doi:10.7554/eLife.62709)
Supplement: Figure 8—source data 1. [file elife-62709-fig8-data1.xlsx]

## Sheet: 8 A
NUMBER CHLOROPLAST / CELL
	T0	T4	T24	T96		MEAN	SD
REPLICATE 1	17	19	29	135		22.5	6.22093
REPLICATE 2	25	19	26	82		25.5	7.86766
REPLICATE 3	34	28	36	86		26.4286	5.91205
REPLICATE 4	20	35	16	113		112.4	28.5535
REPLICATE 5	20	34	27	146
REPLICATE 6	19	18	26
REPLICATE 7			25

## Sheet: 8 B
CELL VOLUME (um3)
	T0	T4	T24	T96			MEAN	SD
REPLICATE 1	992.438	1593.49	6742.34	56212		0	1173.31	284.401
REPLICATE 2	1171.41	1896.49	4315.92	33847		4	1890.75	362.093
REPLICATE 3	1566.57	1545.06	5931.41	61281.6		24	6102.84	1309.21
REPLICATE 4	1419.31	2538.82	5677.15	59048.1		96	52597.2	12671.1
REPLICATE 5	1106.81	2002.81	7847.4
REPLICATE 6	783.298	1767.84

## Sheet: 8 E
VOLUME DIVIDING CHLOROPLAST (um3)
	T24	T96			MEAN	SD
REPLICATE 1	103.983	147		T24	96.0777	10.0702
REPLICATE 2	99.51	115		T96	135.591	17.8673
REPLICATE 3	84.74	144.774

## Sheet: 8 supp 1
	VOLUME (um3)
	T48	T72			MEAN	SD
REPLICATE 1	81.35	99.5		T48	70.142	10.2108
REPLICATE 2	57.9	44.4		T72	85	22.901
REPLICATE 3	78.47	91.1
REPLICATE 4	71.27	96
REPLICATE 5	61.72	94
