# Supplementary material for: A multifaceted analysis reveals two distinct phases of chloroplast biogenesis during de-etiolation in Arabidopsis
Source: eLife. 2021 Feb 25;10:e62709. doi: 10.7554/eLife.62709 (PMC7906606; doi:10.7554/eLife.62709)
Supplement: Figure 9—source data 1. [file elife-62709-fig9-data1.xlsx]

## Sheet: thyl surface and model data
THYLAKOID SURFACE PER SEEDLING
				MOLECULAR DATA
	MORPHOMETRIC
	T4.1	#REF!			PSI				PSII				CYT B5F				MGDG				DGDG
	T4.2	#REF!		T0	0	0	0		1.47134e+06	2.54082e+06	2.10794e+06		811463	1.02495e+06	559522		1.14074e+07	1.0705e+07	1.12198e+07		3.299e+06	3.53709e+06	4.08686e+06
	T4.3	#REF!		T4	0	0	0		3.33693e+06	2.5367e+06	2.33404e+06		860809	1.12515e+06	543754		1.22543e+07	1.03744e+07	1.19655e+07		4.43357e+06	3.62644e+06	4.62259e+06
	T24.1	#REF!		T8	0	0	0		4.45539e+06	4.58227e+06	4.16815e+06		738244	887698	622603		1.23367e+07	1.05877e+07	1.03118e+07		4.24394e+06	4.08665e+06	3.9834e+06
	T24.2	#REF!		T12	632148	638495	1.41344e+06		1.10518e+07	8.51418e+06	1.01729e+07		1.18878e+06	2.34556e+06	1.17894e+06		1.84859e+07	1.8641e+07	1.5459e+07		6.22351e+06	6.74685e+06	5.80898e+06
	T24.4	#REF!		T24	1.54681e+07	1.60446e+07	8.30862e+06		3.48787e+07	2.4767e+07	2.2975e+07		2.98316e+06	4.82839e+06	2.51604e+06		4.64779e+07	3.85908e+07	3.97168e+07		1.43253e+07	1.24711e+07	1.28888e+07
	T96.4	#REF!		T48	3.08558e+07	6.27881e+06	2.58714e+07		6.46006e+07	7.67607e+07	4.04299e+07		6.40516e+06	5.08638e+06	4.41026e+06		8.06046e+07	9.25103e+07	8.62433e+07		2.19745e+07	2.52907e+07	2.22973e+07
	T96.5	#REF!		T72	3.45496e+07	2.1678e+07	3.4966e+07		1.11846e+08	1.27835e+08	1.04587e+08		1.48004e+07	2.30865e+07	1.27319e+07		1.58831e+08	1.67329e+08	1.76543e+08		3.73651e+07	3.92841e+07	4.24348e+07
	T96.6	#REF!		T96	5.21925e+07	2.06218e+07	5.43711e+07		2.36122e+08	1.7996e+08	1.32918e+08		1.90827e+07	3.6312e+07	1.571e+07		2.14733e+08	2.53276e+08	2.38308e+08		5.08044e+07	5.81316e+07	5.54588e+07
				FOR PSI:NEGATIVE VALUES CONVERTED IN 0									REPLICATES FOR MATH MODEL
												T0	1.69892e+07	1.78079e+07	1.79741e+07
												T4	2.08856e+07	1.76627e+07	1.94659e+07
												T8	2.17743e+07	2.01444e+07	1.9086e+07
												T12	3.75821e+07	3.68861e+07	3.40333e+07
												T24	1.14133e+08	9.67019e+07	8.64053e+07
												T48	2.04441e+08	2.05927e+08	1.79252e+08
												T72	3.57392e+08	3.79213e+08	3.71263e+08
												T96	5.72935e+08	5.48302e+08	4.96767e+08
												data organized for R			CALCULATION OF THE 4 COEFFICIENTS (a,b,c and d)
												temps	aire	replica			Coefficient	Value	SE (+/-)	t value
												0	1.69892e+07	1			a	23.923	0.12	191.52
												4	2.08856e+07	1			b	29.649	0.4	73.57
												8	2.17743e+07	1			c	0.884	0.11	7.68
												12	3.75821e+07	1			d	4.962	0.16	30.79
												24	1.14133e+08	1
												48	2.04441e+08	1
												72	3.57392e+08	1
												96	5.72935e+08	1
												0	1.78079e+07	2
													4	1.76627e+07	2
													8	2.01444e+07	2
													12	3.68861e+07	2
													24	9.67019e+07	2
													48	2.05927e+08	2
													72	3.79213e+08	2
													96	5.48302e+08	2
													0	1.79741e+07	3
													4	1.94659e+07	3
													8	1.9086e+07	3
													12	3.40333e+07	3
													24	8.64053e+07	3
													48	1.79252e+08	3
													72	3.71263e+08	3
													96	4.96767e+08	3

## Sheet: EQUATION.4_CALCULATION
	COEFFICIENTS CALCULATED USING R SCRIPT			EQUATION
NON LINEAR MODEL , DATA GENERATED IN R	A	23.923		A+ (B-A)/1 + E (D-X)/C				1 + E (D-X)/C	B-A
	B	29.649						B-A	5.726
	C	0.884
	D	4.962
	CALCULATIONS
		LOG BASE 2	(D-X)/C	EXP	1+ EXP VALUE			POTENZA	MODEL DATA
	0	0	5.61312	273.998	274.998	0.0208219	23.9438	1.61365e+07
	4	2	3.35068	28.5221	29.5221	0.193956	24.117	1.8194e+07
	8	3	2.21946	9.20233	10.2023	0.561244	24.4842	2.34689e+07
	12	3.58496	1.55773	4.74805	5.74805	0.996163	24.9192	3.1726e+07
	24	4.58496	0.426513	1.53191	2.53191	2.26154	26.1845	7.6266e+07
	48	5.58496	-0.704709	0.494253	1.49425	3.83202	27.755	2.26513e+08
	72	6.16993	-1.36643	0.255015	1.25502	4.56249	28.4855	3.75827e+08
	96	6.58496	-1.83593	0.159465	1.15947	4.93848	28.8615	4.87722e+08

## Sheet: FIG 9 _DATA
TIME	MODEL	MORPHO
0	1.61365e+07	4	#REF!
4	1.8194e+07	4	#REF!
		4	#REF!
		24	#REF!
8	2.34689e+07	24	#REF!
12	3.1726e+07	24	#REF!
24	7.6266e+07	96	#REF!
		96	#REF!
		96	#REF!
48	2.26513e+08
72	3.75827e+08
96	4.87722e+08

## Sheet: Fig9 supp1
IMAGE J MEASURE
	COTYLEDON SURFACE (mm2)	THICKNESS			TOTAL COTYLEDON VOLUME		MEAN		VOLUME ONLY OF CELLS	NB CELLS PER COTYLEDON	NB CELLS PER SEEDLING
							T24	17895000	9.45758e+06	#REF!	#REF!
T24	0.351	60			T24	21060000	T96	1.49127e+08	7.21658e+07	#REF!	#REF!	#REF!
	0.32					19200000
	0.308					18480000
	0.214					12840000	T24	17895000	3.54097e+06
T96	1.391	104.333			T96	1.45128e+08	T96	1.49127e+08	7.56854e+06
	1.384					1.44397e+08
	1.513					1.57856e+08
IDENTIFICATION OF ZONES WITH PALISADE AND SPONGY CELLS (2D IMAGES)
T24								T24	1.79	0.35
TOT AREA	5730.61	TOT AREA	9531.27	TOT AREA	8839.66	%		T96	14.9	0.7
FIRST PALISADE	2064.67	FIRST PALISADE	1438.54	FIRST PALISADE	1691
SPONGY	815.544	SECOND PALISADE	1327.48	SECOND PALISADE	1445.92	0.502601	0.528504
		FIRST SPONGY	1090.62	FIRST SPONGY	1625.71	0.495036
		SECOND SPONGY	861.677	SECOND SPONGY	434	0.587876
	T96			%
IMAGE	100-103	400-403	33-36
TOT AREA	19110.2	20250.1	18546.2	0.545971	0.483922
FIRST PALISADE	7656	6437	6088.43	0.442764
SPONGY	2777.63	2529	2499	0.463029
														0.0183165
														0.0438759
