# Supplementary material for: A multifaceted analysis reveals two distinct phases of chloroplast biogenesis during de-etiolation in Arabidopsis
Source: eLife. 2021 Feb 25;10:e62709. doi: 10.7554/eLife.62709 (PMC7906606; doi:10.7554/eLife.62709)
Supplement: Table 2—source data 1. [file elife-62709-table2-data1.xlsx]

## Sheet: Feuil1
			THYLAKOID SURFACE PER SEEDLING
			MGDG			DGDG			PSII			PSI			cytb6f
			MEAN	SD		MEAN	SD		MEAN	SD		MEAN	SD		MEAN	SD
		T0	1.11107e+07	363664		3.64099e+06	404075		2.04003e+06	537965		0	0		798645	232979
		T4	1.15314e+07	1.01237e+06		4.22753e+06	529069		2.73589e+06	530287		0	0		843239	291098
		T8	1.10787e+07	1.09811e+06		4.10466e+06	131199		4.40194e+06	212172		0	0		749515	132906
		T12	1.75286e+07	1.79403e+06		6.25978e+06	469982		9.91297e+06	1.28863e+06		894696	449261		1.5711e+06	670729
		T24	4.15951e+07	4.26589e+06		1.32284e+07	972620		2.75403e+07	6.41814e+06		1.32738e+07	4.30959e+06		3.44253e+06	1.22271e+06
		T48	8.64527e+07	5.95564e+06		2.31875e+07	1.82857e+06		6.05971e+07	1.84933e+07		2.1002e+07	1.29919e+07		5.3006e+06	1.01456e+06
		T72	1.67568e+08	8.85846e+06		3.96946e+07	2.55966e+06		1.14756e+08	1.18941e+07		3.03979e+07	7.55448e+06		1.68729e+07	5.4796e+06
		T96	2.35439e+08	1.94309e+07		5.47983e+07	3.70795e+06		1.83e+08	5.16687e+07		4.23952e+07	1.88877e+07		2.37016e+07	1.10504e+07
		PHOTOSYNTHETIC PROTEINS					GLs				RATIO PROTEIN/GLs				MEAN	SD
	T0	2.2828e+06	3.56577e+06	2.66746e+06			1.47064e+07	1.42421e+07	1.53067e+07		0.155225	0.250368	0.174268		0.193287	0.0503422
	T4	4.19774e+06	3.66186e+06	2.87779e+06			1.66879e+07	1.40008e+07	1.65881e+07		0.251544	0.261546	0.173485		0.228858	0.0482147
	T8	5.19364e+06	5.46997e+06	4.79075e+06			1.65806e+07	1.46744e+07	1.42952e+07		0.313235	0.372756	0.33513		0.340374	0.0301051
	T12	1.28727e+07	1.14982e+07	1.27653e+07			2.47094e+07	2.53879e+07	2.1268e+07		0.520965	0.452903	0.600212		0.524693	0.0737252
	T24	5.333e+07	4.564e+07	3.37997e+07			6.08032e+07	5.10619e+07	5.26056e+07		0.877092	0.893817	0.642511		0.804474	0.140513
	T48	1.01862e+08	8.81259e+07	7.07116e+07			1.02579e+08	1.17801e+08	1.08541e+08		0.993005	0.748091	0.651476		0.797524	0.176049
	T72	1.61196e+08	1.726e+08	1.52285e+08			1.96196e+08	2.06613e+08	2.18978e+08		0.821609	0.835377	0.695437		0.784141	0.0771275
	T96	3.07397e+08	2.36894e+08	2.03e+08			2.65538e+08	3.11408e+08	2.93767e+08		1.15764	0.760719	0.691022		0.869793	0.251705
